# Supplementary material
Source: publisher figshare collection journal article supplement (https://acs.figshare.com/ndownloader/files/3765121)
Supplement: Supplementary file 1 [file 3765121]

data_cpj01_sq
_audit_creation_date              2015-06-08
_audit_creation_method
;
Olex2 1.2-alpha
(compiled 2015.05.19 svn.r3182 for OlexSys, GUI svn.r3563)
;
_publ_contact_author_address      ?
_publ_contact_author_email        ?
_publ_contact_author_name         ''
_publ_contact_author_phone        ?
_publ_section_references
;
Dolomanov, O.V., Bourhis, L.J., Gildea, R.J, Howard, J.A.K. & Puschmann, H.
 (2009), J. Appl. Cryst. 42, 339-341.

Sheldrick, G.M. (2015). Acta Cryst. A71, 3-8.

Sheldrick, G.M. (2015). Acta Cryst. C71, 3-8.
;
_chemical_name_common             ?
_chemical_name_systematic         ?
_chemical_formula_moiety
'C144 H162 Ag25 S18, C24 H20 P, C H2 Cl2, C6 H14'
_chemical_formula_sum             'C175 H198 Ag25 Cl2 P S18'
_chemical_formula_weight          5677.02
_chemical_melting_point           ?
loop_
  _atom_type_symbol
  _atom_type_description
  _atom_type_scat_dispersion_real
  _atom_type_scat_dispersion_imag
  _atom_type_scat_source
 'C' 'C' 0.0033 0.0016 'International Tables Vol C Tables 4.2.6.8 and 6.1.1.4'
 'H' 'H' 0.0000 0.0000 'International Tables Vol C Tables 4.2.6.8 and 6.1.1.4'
 'Ag' 'Ag' -0.8971 1.1015
 'International Tables Vol C Tables 4.2.6.8 and 6.1.1.4'
 'Cl' 'Cl' 0.1484 0.1585 'International Tables Vol C Tables 4.2.6.8 and 6.1.1.4'
 'P' 'P' 0.1023 0.0942 'International Tables Vol C Tables 4.2.6.8 and 6.1.1.4'
 'S' 'S' 0.1246 0.1234 'International Tables Vol C Tables 4.2.6.8 and 6.1.1.4'

_shelx_space_group_comment
;
The symmetry employed for this shelxl refinement is uniquely defined
by the following loop, which should always be used as a source of
symmetry information in preference to the above space-group names.
They are only intended as comments.
;
_space_group_crystal_system       'triclinic'
_space_group_IT_number            2
_space_group_name_H-M_alt         'P -1'
_space_group_name_Hall            '-P 1'
loop_
  _space_group_symop_operation_xyz
 'x, y, z'
 '-x, -y, -z'

_cell_length_a                    19.0634(10)
_cell_length_b                    19.5919(10)
_cell_length_c                    26.7981(14)
_cell_angle_alpha                 93.424(2)
_cell_angle_beta                  90.859(2)
_cell_angle_gamma                 104.756(2)
_cell_volume                      9656.7(9)
_cell_formula_units_Z             2
_cell_measurement_reflns_used     9956
_cell_measurement_temperature     120
_cell_measurement_theta_max       27.84
_cell_measurement_theta_min       2.21
_shelx_estimated_absorpt_T_max    ?
_shelx_estimated_absorpt_T_min    ?
_exptl_absorpt_coefficient_mu     2.744
_exptl_absorpt_correction_T_max   1.0000
_exptl_absorpt_correction_T_min   0.8738
_exptl_absorpt_correction_type    none
_exptl_absorpt_process_details
;
SADABS-2014/4 (Bruker,2014/4) was used for absorption correction.
wR2(int) was 0.0723 before and 0.0636 after correction.
The Ratio of minimum to maximum transmission is 0.8738.
The \l/2 correction factor is Not present.
;
_exptl_absorpt_special_details    ?
_exptl_crystal_colour             'metallic black'
_exptl_crystal_colour_lustre      metallic
_exptl_crystal_colour_modifier    .
_exptl_crystal_colour_primary     black
_exptl_crystal_density_diffrn     1.952
_exptl_crystal_density_meas       ?
_exptl_crystal_density_method     ?
_exptl_crystal_description        irregular
_exptl_crystal_F_000              5520
_exptl_crystal_preparation        ?
_exptl_crystal_recrystallization_method
'The material was recrystallised from a mixture of DCM and hexane by slow evaporation'
_exptl_crystal_size_max           0.091
_exptl_crystal_size_mid           0.081
_exptl_crystal_size_min           0.049
_exptl_transmission_factor_max    ?
_exptl_transmission_factor_min    ?
_diffrn_reflns_av_R_equivalents   0.1342
_diffrn_reflns_av_unetI/netI      0.1458
_diffrn_reflns_Laue_measured_fraction_full 0.999
_diffrn_reflns_Laue_measured_fraction_max 0.999
_diffrn_reflns_limit_h_max        22
_diffrn_reflns_limit_h_min        -22
_diffrn_reflns_limit_k_max        23
_diffrn_reflns_limit_k_min        -23
_diffrn_reflns_limit_l_max        31
_diffrn_reflns_limit_l_min        -31
_diffrn_reflns_number             149600
_diffrn_reflns_point_group_measured_fraction_full 0.999
_diffrn_reflns_point_group_measured_fraction_max 0.999
_diffrn_reflns_theta_full         25.000
_diffrn_reflns_theta_max          25.000
_diffrn_reflns_theta_min          2.155
_diffrn_ambient_temperature       120
_diffrn_detector_area_resol_mean  ?
_diffrn_measured_fraction_theta_full 0.999
_diffrn_measured_fraction_theta_max 0.999
_diffrn_measurement_device_type   'Bruker APEX-II CCD'
_diffrn_measurement_method        '\f and \w scans'
_diffrn_radiation_type            MoK\a
_diffrn_radiation_wavelength      0.71073
_diffrn_source                    ?
_diffrn_special_details           .
_diffrn_standards_number          0
_reflns_Friedel_coverage          0.000
_reflns_Friedel_fraction_full     .
_reflns_Friedel_fraction_max      .
_reflns_number_gt                 17944
_reflns_number_total              33976
_reflns_special_details
;
 Reflections were merged by SHELXL according to the crystal
 class for the calculation of statistics and refinement.
 
 Structure factors included contributions from the .fab file.
 
 _reflns_Friedel_fraction is defined as the number of unique
 Friedel pairs measured divided by the number that would be
 possible theoretically, ignoring centric projections and
 systematic absences.
;
_reflns_threshold_expression      'I > 2\s(I)'
_computing_cell_refinement        'SAINT v8.34A (Bruker, 2013)'
_computing_data_collection        ?
_computing_data_reduction         'SAINT v8.34A (Bruker, 2013)'
_computing_molecular_graphics     'Olex2 (Dolomanov et al., 2009)'
_computing_publication_material   'Olex2 (Dolomanov et al., 2009)'
_computing_structure_refinement   'ShelXL (Sheldrick, 2015)'
_computing_structure_solution     'ShelXT (Sheldrick, 2015)'
_refine_diff_density_max          1.663
_refine_diff_density_min          -1.374
_refine_diff_density_rms          0.220
_refine_ls_extinction_coef        .
_refine_ls_extinction_method      none
_refine_ls_goodness_of_fit_ref    1.029
_refine_ls_hydrogen_treatment     constr
_refine_ls_matrix_type            full
_refine_ls_number_parameters      2028
_refine_ls_number_reflns          33976
_refine_ls_number_restraints      1206
_refine_ls_R_factor_all           0.1536
_refine_ls_R_factor_gt            0.0622
_refine_ls_restrained_S_all       1.014
_refine_ls_shift/su_max           0.001
_refine_ls_shift/su_mean          0.000
_refine_ls_structure_factor_coef  Fsqd
_refine_ls_weighting_details
'w=1/[\s^2^(Fo^2^)+(0.0399P)^2^+123.1876P] where P=(Fo^2^+2Fc^2^)/3'
_refine_ls_weighting_scheme       calc
_refine_ls_wR_factor_gt           0.1148
_refine_ls_wR_factor_ref          0.1506
_refine_special_details
'SQUEEZE has been used to mask some DCM n-haxane that could not be modelled. The combined number of electrons for these two solvent molecules is 92, and, assuming that their crystallisation ratio is 1:1 (as indicated by those molecules that could be modelled successfully) we conclude that the 336 electrons reported by SQUEEZE are attributable to about 1.8 extra DCM and n-hexame molecules. It is likely that the original crystal contained three molecules of DCM and three molecules of n-hexane. It is consistent with the low crystal quality that some of these solvent molecules have diffused out of the crystal on transport.'
_olex2_refinement_description
;
1. Fixed Uiso
 At 1.2 times of:
  All C(H) groups, All C(H,H) groups
 At 1.5 times of:
  All C(H,H,H) groups
2. Rigid body (RIGU) restrains
 S1_1, S1_2, S1_3, S1_4, S1_5, S1_6, S1_7, S1_8, S1_9, S1_10, S1_11, S1_12,
 S1_13, S1_14, S1_15, S1_16, S1_17, S1_18, C1_1, C1_2, C1_3, C1_4, C1_5, C1_6,
 C1_7, C1_8, C1_9, C1_10, C1_11, C1_12, C1_13, C1_14, C1_15, C1_16, C1_17,
 C1_18, C02X, C03G, C03L, C03R, C03T, C04B, C04H, C04J, C04V, C04X, C05A, C05C,
 C05E, C05I, C05J, C05K, C05N, C05O, C05Q, C05R, C05T, C05U, C05X, C2_1, C3_1,
 C4_1, C5_1, C6_1, C7_1, C2_2, C3_2, C4_2, C5_2, C6_2, C7_2, C2_3, C3_3, C4_3,
 C5_3, C6_3, C7_3, C2_4, C3_4, C4_4, C5_4, C6_4, C7_4, C2_5, C3_5, C4_5, C5_5,
 C6_5, C7_5, C2_6, C3_6, C4_6, C5_6, C6_6, C7_6, C2_7, C3_7, C4_7, C5_7, C6_7,
 C7_7, C2_8, C3_8, C4_8, C5_8, C6_8, C7_8, C2_9, C3_9, C4_9, C5_9, C6_9, C7_9,
 C2_10, C3_10, C4_10, C5_10, C6_10, C7_10, C2_11, C3_11, C4_11, C5_11, C6_11,
 C7_11, C2_12, C3_12, C4_12, C5_12, C6_12, C7_12, C2_13, C3_13, C4_13, C5_13,
 C6_13, C7_13, C2_14, C3_14, C4_14, C5_14, C6_14, C7_14, C2_15, C3_15, C4_15,
 C5_15, C6_15, C7_15, C2_16, C3_16, C4_16, C5_16, C6_16, C7_16, C2_17, C3_17,
 C4_17, C5_17, C6_17, C7_17, C2_18, C3_18, C4_18, C5_18, C6_18, C7_18, C8_1
 with sigma for 1-2 distances of 0.004 and sigma for 1-3 distances of 0.004
 C065, C05I, H05B, H05D, C060, C0AA, H06A, H06B, C062, H0AA, H0AB, C05R, H06F,
 H06G, H06C, H06D, H06E, H05F, H05G, H05H
 with sigma for 1-2 distances of 0.004 and sigma for 1-3 distances of 0.004
 C04J, P018, C03L, C03R, C04V, C03G, C04B, C03T, C063, C05J, C05O, C05E, C05Q,
 H03G, C05C, H04B, C05T, H03T, C05A, C061, H063, H05J, C05U, C05K, H05O, C04X,
 H05E, C052, H05Q, H05C, C05N, H05T, H05A, C05X, H061, H05U, C, H05K, C02X,
 H04X, H052, H05N, H05X, H, H02X
 with sigma for 1-2 distances of 0.004 and sigma for 1-3 distances of 0.004
3.a Secondary CH2 refined with riding coordinates:
 C04H(H04A,H04C), C05I(H05B,H05D), C060(H06A,H06B), C065(H06F,H06G), C0AA(H0AA,
 H0AB)
3.b Aromatic/amide H refined with riding coordinates:
 C02X(H02X), C03G(H03G), C03T(H03T), C04B(H04B), C04X(H04X), C052(H052),
 C05A(H05A), C05C(H05C), C05E(H05E), C05J(H05J), C05K(H05K), C05N(H05N),
 C05O(H05O), C05Q(H05Q), C05T(H05T), C05U(H05U), C05X(H05X), C061(H061),
 C063(H063), C(H), C3(H3), C5(H5), C6(H6), C3(H3), C5(H5), C6(H6), C3(H3),
 C5(H5), C6(H6), C3(H3), C5(H5), C6(H6), C3(H3), C5(H5), C6(H6), C3(H3), C5(H5),
  C6(H6), C3(H3), C5(H5), C6(H6), C3(H3), C5(H5), C6(H6), C3(H3), C5(H5),
 C6(H6), C3(H3), C5(H5), C6(H6), C3(H3), C5(H5), C6(H6), C3(H3), C5(H5), C6(H6),
  C3(H3), C5(H5), C6(H6), C3(H3), C5(H5), C6(H6), C3(H3), C5(H5), C6(H6),
 C3(H3), C5(H5), C6(H6), C3(H3), C5(H5), C6(H6), C3(H3), C5(H5), C6(H6)
3.c Idealised Me refined as rotating group:
 C05R(H05F,H05G,H05H), C062(H06C,H06D,H06E), C7(H7A,H7B,H7C), C8(H8A,H8B,H8C),
 C7(H7A,H7B,H7C), C8(H8A,H8B,H8C), C7(H7A,H7B,H7C), C8(H8A,H8B,H8C), C7(H7A,H7B,
 H7C), C8(H8A,H8B,H8C), C7(H7A,H7B,H7C), C8(H8A,H8B,H8C), C7(H7A,H7B,H7C),
 C8(H8A,H8B,H8C), C7(H7A,H7B,H7C), C8(H8A,H8B,H8C), C7(H7A,H7B,H7C), C8(H8A,H8B,
 H8C), C7(H7A,H7B,H7C), C8(H8A,H8B,H8C), C7(H7A,H7B,H7C), C8(H8A,H8B,H8C),
 C7(H7A,H7B,H7C), C8(H8A,H8B,H8C), C7(H7A,H7B,H7C), C8(H8A,H8B,H8C), C7(H7A,H7B,
 H7C), C8(H8A,H8B,H8C), C7(H7A,H7B,H7C), C8(H8A,H8B,H8C), C7(H7A,H7B,H7C),
 C8(H8A,H8B,H8C), C7(H7A,H7B,H7C), C8(H8A,H8B,H8C), C7(H7A,H7B,H7C), C8(H8A,H8B,
 H8C), C7(H7A,H7B,H7C), C8(H8A,H8B,H8C)
;
_atom_sites_solution_hydrogens    geom
_atom_sites_solution_primary      ?
_atom_sites_solution_secondary    ?
loop_
  _atom_site_label
  _atom_site_type_symbol
  _atom_site_fract_x
  _atom_site_fract_y
  _atom_site_fract_z
  _atom_site_U_iso_or_equiv
  _atom_site_adp_type
  _atom_site_occupancy
  _atom_site_site_symmetry_order
  _atom_site_calc_flag
  _atom_site_refinement_flags_posn
  _atom_site_refinement_flags_adp
  _atom_site_refinement_flags_occupancy
  _atom_site_disorder_assembly
  _atom_site_disorder_group
 Ag01 Ag 0.69751(5) 0.69898(5) 0.25831(4) 0.0167(2) Uani 1 1 d . . . . .
 Ag02 Ag 0.84605(5) 0.74647(5) 0.26759(4) 0.0225(2) Uani 1 1 d . . . . .
 Ag03 Ag 0.77119(5) 0.62532(5) 0.31633(4) 0.0229(2) Uani 1 1 d . . . . .
 Ag04 Ag 0.75218(5) 0.84366(5) 0.26117(4) 0.0229(2) Uani 1 1 d . . . . .
 Ag05 Ag 0.75723(5) 0.76238(5) 0.34903(4) 0.0224(2) Uani 1 1 d . . . . .
 Ag06 Ag 0.62721(5) 0.77678(5) 0.20079(4) 0.0231(2) Uani 1 1 d . . . . .
 Ag07 Ag 0.54848(5) 0.65226(5) 0.25135(4) 0.0236(2) Uani 1 1 d . . . . .
 Ag08 Ag 0.64181(6) 0.55317(5) 0.25297(4) 0.0237(2) Uani 1 1 d . . . . .
 Ag09 Ag 0.62529(6) 0.64292(5) 0.34061(4) 0.0246(3) Uani 1 1 d . . . . .
 Ag0A Ag 0.76529(5) 0.75677(5) 0.17487(4) 0.0233(2) Uani 1 1 d . . . . .
 Ag0B Ag 0.64121(6) 0.63249(5) 0.16768(4) 0.0235(2) Uani 1 1 d . . . . .
 Ag0C Ag 0.61563(6) 0.77614(5) 0.31112(4) 0.0244(3) Uani 1 1 d . . . . .
 Ag0D Ag 0.77441(5) 0.61537(5) 0.20724(4) 0.0233(2) Uani 1 1 d . . . . .
 Ag0E Ag 0.65936(6) 0.78164(6) 0.42564(4) 0.0302(3) Uani 1 1 d . . . . .
 Ag0F Ag 0.91513(6) 0.86875(6) 0.21336(4) 0.0329(3) Uani 1 1 d . . . . .
 Ag0G Ag 0.50263(6) 0.49511(6) 0.30144(4) 0.0339(3) Uani 1 1 d . . . . .
 Ag0H Ag 0.63570(6) 0.73077(6) 0.08931(4) 0.0328(3) Uani 1 1 d . . . . .
 Ag0I Ag 0.91947(6) 0.62693(6) 0.25125(4) 0.0355(3) Uani 1 1 d . . . . .
 Ag0J Ag 0.86374(6) 0.90834(6) 0.33736(4) 0.0357(3) Uani 1 1 d . . . . .
 Ag0K Ag 0.48172(6) 0.53210(6) 0.18571(4) 0.0368(3) Uani 1 1 d . . . . .
 Ag0L Ag 0.77886(6) 0.65020(6) 0.09884(4) 0.0365(3) Uani 1 1 d . . . . .
 Ag0M Ag 0.47880(6) 0.77540(6) 0.23105(4) 0.0346(3) Uani 1 1 d . . . . .
 Ag0N Ag 0.62384(6) 0.91375(6) 0.27495(5) 0.0368(3) Uani 1 1 d . . . . .
 Ag0O Ag 0.77426(6) 0.48320(6) 0.27302(4) 0.0358(3) Uani 1 1 d . . . . .
 Ag0P Ag 0.71341(6) 0.61672(6) 0.42237(4) 0.0360(3) Uani 1 1 d . . . . .
 P018 P 0.3395(2) 0.1330(2) 0.23335(18) 0.0487(12) Uani 1 1 d . U . . .
 Cl01 Cl 0.8067(3) 1.0869(3) 0.4238(2) 0.0872(18) Uani 1 1 d . . . . .
 Cl0A Cl 0.6508(4) 1.0642(3) 0.4311(3) 0.115(2) Uani 1 1 d . . . . .
 C02X C 0.1583(9) -0.0310(9) 0.2986(6) 0.050(4) Uani 1 1 d . U . . .
 H02X H 0.1201 -0.0649 0.3125 0.060 Uiso 1 1 calc R U . . .
 C03G C 0.3470(10) 0.2412(8) 0.1712(5) 0.045(4) Uani 1 1 d . U . . .
 H03G H 0.3958 0.2395 0.1666 0.054 Uiso 1 1 calc R U . . .
 C03L C 0.3014(9) 0.1953(8) 0.2024(6) 0.045(4) Uani 1 1 d . U . . .
 C03R C 0.4010(8) 0.1771(9) 0.2821(7) 0.052(4) Uani 1 1 d . U . . .
 C03T C 0.4325(9) 0.2492(9) 0.2846(7) 0.056(4) Uani 1 1 d . U . . .
 H03T H 0.4205 0.2762 0.2590 0.068 Uiso 1 1 calc R U . . .
 C04B C 0.2309(9) 0.1988(9) 0.2099(7) 0.052(4) Uani 1 1 d . U . . .
 H04B H 0.2010 0.1674 0.2311 0.062 Uiso 1 1 calc R U . . .
 C04H C 0.7217(9) 1.0246(9) 0.4222(7) 0.064(5) Uani 1 1 d . U . . .
 H04A H 0.7143 0.9970 0.3896 0.077 Uiso 1 1 calc R . . . .
 H04C H 0.7214 0.9913 0.4487 0.077 Uiso 1 1 calc R . . . .
 C04J C 0.3815(10) 0.0891(9) 0.1846(7) 0.060(4) Uani 1 1 d . U . . .
 C04V C 0.2710(9) 0.0674(9) 0.2595(6) 0.053(4) Uani 1 1 d . U . . .
 C04X C 0.1810(11) 0.0331(10) 0.3219(7) 0.078(7) Uani 1 1 d . U . . .
 H04X H 0.1590 0.0445 0.3518 0.094 Uiso 1 1 calc R U . . .
 C052 C 0.1875(10) -0.0498(9) 0.2558(7) 0.060(5) Uani 1 1 d . U . . .
 H052 H 0.1704 -0.0958 0.2398 0.072 Uiso 1 1 calc R U . . .
 C05A C 0.4795(9) 0.2830(10) 0.3219(7) 0.065(5) Uani 1 1 d . U . . .
 H05A H 0.5010 0.3324 0.3223 0.078 Uiso 1 1 calc R U . . .
 C05C C 0.3181(10) 0.2888(8) 0.1477(6) 0.056(4) Uani 1 1 d . U . . .
 H05C H 0.3472 0.3197 0.1256 0.067 Uiso 1 1 calc R U . . .
 C05E C 0.2375(11) 0.0834(10) 0.3019(7) 0.082(7) Uani 1 1 d . U . . .
 H05E H 0.2529 0.1295 0.3180 0.099 Uiso 1 1 calc R U . . .
 C05I C 0.8984(11) 0.3850(12) 0.3833(7) 0.086(6) Uani 1 1 d . U . . .
 H05B H 0.8806 0.4224 0.3680 0.103 Uiso 1 1 calc R U . . .
 H05D H 0.9050 0.3979 0.4196 0.103 Uiso 1 1 calc R U . . .
 C05J C 0.3478(11) 0.0762(9) 0.1380(8) 0.067(5) Uani 1 1 d . U . . .
 H05J H 0.3063 0.0932 0.1316 0.081 Uiso 1 1 calc R U . . .
 C05K C 0.4686(11) 0.0276(10) 0.1568(9) 0.081(5) Uani 1 1 d . U . . .
 H05K H 0.5112 0.0117 0.1617 0.097 Uiso 1 1 calc R U . . .
 C05N C 0.2452(11) 0.2929(9) 0.1556(7) 0.067(5) Uani 1 1 d . U . . .
 H05N H 0.2257 0.3263 0.1396 0.080 Uiso 1 1 calc R U . . .
 C05O C 0.4420(10) 0.0662(10) 0.1986(8) 0.081(5) Uani 1 1 d . U . . .
 H05O H 0.4639 0.0745 0.2312 0.097 Uiso 1 1 calc R U . . .
 C05Q C 0.2436(10) 0.0009(9) 0.2361(7) 0.060(5) Uani 1 1 d . U . . .
 H05Q H 0.2637 -0.0108 0.2055 0.072 Uiso 1 1 calc R U . . .
 C05R C 0.7135(10) 0.2462(11) 0.3996(7) 0.078(6) Uani 1 1 d . U . . .
 H05F H 0.7033 0.2297 0.3644 0.117 Uiso 1 1 calc GR U . . .
 H05G H 0.6701 0.2565 0.4141 0.117 Uiso 1 1 calc GR U . . .
 H05H H 0.7271 0.2094 0.4179 0.117 Uiso 1 1 calc GR U . . .
 C05T C 0.2046(11) 0.2473(9) 0.1869(7) 0.063(5) Uani 1 1 d . U . . .
 H05T H 0.1562 0.2496 0.1928 0.076 Uiso 1 1 calc R U . . .
 C05U C 0.3742(11) 0.0384(9) 0.1001(8) 0.076(5) Uani 1 1 d . U . . .
 H05U H 0.3519 0.0297 0.0675 0.091 Uiso 1 1 calc R U . . .
 C05X C 0.4954(11) 0.2430(11) 0.3594(9) 0.095(7) Uani 1 1 d . U . . .
 H05X H 0.5268 0.2656 0.3867 0.114 Uiso 1 1 calc R U . . .
 C060 C 0.8389(12) 0.3159(12) 0.3759(9) 0.097(7) Uani 1 1 d . U . . .
 H06A H 0.8251 0.3080 0.3398 0.116 Uiso 1 1 calc R U . . .
 H06B H 0.8598 0.2768 0.3849 0.116 Uiso 1 1 calc R U . . .
 C061 C 0.4658(13) 0.1704(11) 0.3575(9) 0.119(10) Uani 1 1 d . U . . .
 H061 H 0.4777 0.1435 0.3833 0.143 Uiso 1 1 calc R U . . .
 C062 C 1.0239(12) 0.4492(13) 0.3760(8) 0.101(8) Uani 1 1 d . U . . .
 H06C H 1.0310 0.4787 0.3472 0.151 Uiso 1 1 calc GR U . . .
 H06D H 1.0691 0.4365 0.3840 0.151 Uiso 1 1 calc GR U . . .
 H06E H 1.0102 0.4756 0.4048 0.151 Uiso 1 1 calc GR U . . .
 C063 C 0.4193(12) 0.1370(11) 0.3186(9) 0.104(8) Uani 1 1 d . U . . .
 H063 H 0.4001 0.0871 0.3168 0.125 Uiso 1 1 calc R U . . .
 C065 C 0.7735(11) 0.3108(12) 0.4034(8) 0.092(7) Uani 1 1 d . U . . .
 H06F H 0.7531 0.3500 0.3938 0.110 Uiso 1 1 calc R U . . .
 H06G H 0.7884 0.3204 0.4392 0.110 Uiso 1 1 calc R U . . .
 C C 0.4332(12) 0.0146(11) 0.1118(9) 0.088(6) Uani 1 1 d . U . . .
 H H 0.4505 -0.0129 0.0867 0.106 Uiso 1 1 calc R U . . .
 C0AA C 0.9675(13) 0.3862(15) 0.3640(10) 0.122(9) Uani 1 1 d . U . . .
 H0AA H 0.9621 0.3788 0.3271 0.147 Uiso 1 1 calc R U . . .
 H0AB H 0.9832 0.3457 0.3764 0.147 Uiso 1 1 calc R U . . .
 S1_1 S 0.5036(2) 0.90225(19) 0.24253(14) 0.0323(9) Uani 1 1 d . U . . .
 C1_1 C 0.4584(7) 0.9254(7) 0.2957(5) 0.026(3) Uani 1 1 d . U . . .
 C2_1 C 0.3815(8) 0.9041(8) 0.2954(6) 0.038(3) Uani 1 1 d . U . . .
 C3_1 C 0.3470(8) 0.9254(8) 0.3371(6) 0.042(4) Uani 1 1 d . U . . .
 H3_1 H 0.2956 0.9107 0.3379 0.051 Uiso 1 1 calc R . . . .
 C4_1 C 0.3841(8) 0.9660(7) 0.3764(6) 0.038(3) Uani 1 1 d . U . . .
 C5_1 C 0.4572(9) 0.9881(9) 0.3758(6) 0.049(4) Uani 1 1 d . U . . .
 H5_1 H 0.4837 1.0164 0.4033 0.059 Uiso 1 1 calc R . . . .
 C6_1 C 0.4930(8) 0.9694(8) 0.3354(5) 0.038(3) Uani 1 1 d . U . . .
 H6_1 H 0.5441 0.9877 0.3348 0.046 Uiso 1 1 calc R . . . .
 C7_1 C 0.3357(9) 0.8548(10) 0.2543(7) 0.074(6) Uani 1 1 d . U . . .
 H7A_1 H 0.3441 0.8767 0.2223 0.111 Uiso 1 1 calc GR . . . .
 H7B_1 H 0.2843 0.8462 0.2621 0.111 Uiso 1 1 calc GR . . . .
 H7C_1 H 0.3494 0.8098 0.2522 0.111 Uiso 1 1 calc GR . . . .
 C8_1 C 0.3438(10) 0.9849(9) 0.4226(6) 0.065(5) Uani 1 1 d . U . . .
 H8A_1 H 0.2947 0.9864 0.4124 0.097 Uiso 1 1 calc GR . . . .
 H8B_1 H 0.3702 1.0312 0.4378 0.097 Uiso 1 1 calc GR . . . .
 H8C_1 H 0.3411 0.9490 0.4470 0.097 Uiso 1 1 calc GR . . . .
 S1_2 S 0.97439(19) 0.75153(19) 0.24747(13) 0.0281(9) Uani 1 1 d . U . . .
 C1_2 C 1.0249(7) 0.7792(7) 0.3051(5) 0.027(3) Uani 1 1 d . U . . .
 C2_2 C 1.0975(8) 0.7746(7) 0.3087(5) 0.030(3) Uani 1 1 d . U . . .
 C3_2 C 1.1374(8) 0.8016(7) 0.3515(5) 0.034(3) Uani 1 1 d . U . . .
 H3_2 H 1.1863 0.7988 0.3537 0.041 Uiso 1 1 calc R . . . .
 C4_2 C 1.1101(8) 0.8327(7) 0.3915(5) 0.035(3) Uani 1 1 d . U . . .
 C5_2 C 1.0390(8) 0.8364(7) 0.3874(5) 0.030(3) Uani 1 1 d . U . . .
 H5_2 H 1.0183 0.8574 0.4144 0.036 Uiso 1 1 calc R . . . .
 C6_2 C 0.9975(8) 0.8100(7) 0.3446(5) 0.027(3) Uani 1 1 d . U . . .
 H6_2 H 0.9487 0.8133 0.3426 0.033 Uiso 1 1 calc R . . . .
 C7_2 C 1.1302(8) 0.7387(8) 0.2671(5) 0.040(4) Uani 1 1 d . U . . .
 H7A_2 H 1.1013 0.6897 0.2608 0.060 Uiso 1 1 calc GR . . . .
 H7B_2 H 1.1800 0.7390 0.2768 0.060 Uiso 1 1 calc GR . . . .
 H7C_2 H 1.1305 0.7640 0.2366 0.060 Uiso 1 1 calc GR . . . .
 C8_2 C 1.1552(9) 0.8638(8) 0.4384(6) 0.053(5) Uani 1 1 d . . . . .
 H8A_2 H 1.1401 0.8326 0.4657 0.079 Uiso 1 1 calc GR . . . .
 H8B_2 H 1.1480 0.9106 0.4477 0.079 Uiso 1 1 calc GR . . . .
 H8C_2 H 1.2066 0.8681 0.4321 0.079 Uiso 1 1 calc GR . . . .
 S1_3 S 0.55445(19) 0.79469(18) 0.12695(13) 0.0269(8) Uani 1 1 d . U . . .
 C1_3 C 0.5857(7) 0.8830(7) 0.1102(5) 0.028(3) Uani 1 1 d . U . . .
 C2_3 C 0.5634(7) 0.9032(7) 0.0644(5) 0.030(3) Uani 1 1 d . U . . .
 C3_3 C 0.5875(7) 0.9742(7) 0.0539(5) 0.028(3) Uani 1 1 d . U . . .
 H3_3 H 0.5721 0.9879 0.0230 0.034 Uiso 1 1 calc R . . . .
 C4_3 C 0.6323(8) 1.0256(7) 0.0853(6) 0.035(3) Uani 1 1 d . U . . .
 C5_3 C 0.6525(8) 1.0051(7) 0.1302(6) 0.036(4) Uani 1 1 d . U . . .
 H5_3 H 0.6820 1.0394 0.1535 0.044 Uiso 1 1 calc R . . . .
 C6_3 C 0.6308(7) 0.9351(7) 0.1422(5) 0.031(3) Uani 1 1 d . U . . .
 H6_3 H 0.6470 0.9223 0.1732 0.037 Uiso 1 1 calc R . . . .
 C7_3 C 0.5124(8) 0.8522(7) 0.0283(5) 0.038(4) Uani 1 1 d . U . . .
 H7A_3 H 0.5333 0.8127 0.0186 0.057 Uiso 1 1 calc GR . . . .
 H7B_3 H 0.5046 0.8763 -0.0015 0.057 Uiso 1 1 calc GR . . . .
 H7C_3 H 0.4659 0.8342 0.0441 0.057 Uiso 1 1 calc GR . . . .
 C8_3 C 0.6563(9) 1.1016(7) 0.0718(7) 0.056(5) Uani 1 1 d . . . . .
 H8A_3 H 0.6639 1.1030 0.0357 0.084 Uiso 1 1 calc GR . . . .
 H8B_3 H 0.7018 1.1252 0.0900 0.084 Uiso 1 1 calc GR . . . .
 H8C_3 H 0.6188 1.1259 0.0807 0.084 Uiso 1 1 calc GR . . . .
 S1_4 S 0.56569(19) 0.53428(18) 0.38081(13) 0.0274(8) Uani 1 1 d . U . . .
 C1_4 C 0.4989(7) 0.5533(7) 0.4207(5) 0.024(3) Uani 1 1 d . U . . .
 C2_4 C 0.4507(7) 0.4989(7) 0.4431(5) 0.025(3) Uani 1 1 d . U . . .
 C3_4 C 0.4041(7) 0.5179(7) 0.4773(5) 0.030(3) Uani 1 1 d . U . . .
 H3_4 H 0.3722 0.4812 0.4937 0.036 Uiso 1 1 calc R . . . .
 C4_4 C 0.4010(8) 0.5854(8) 0.4890(5) 0.036(3) Uani 1 1 d . U . . .
 C5_4 C 0.4469(7) 0.6387(8) 0.4657(5) 0.035(3) Uani 1 1 d . U . . .
 H5_4 H 0.4454 0.6864 0.4732 0.042 Uiso 1 1 calc R . . . .
 C6_4 C 0.4956(7) 0.6237(7) 0.4313(5) 0.030(3) Uani 1 1 d . U . . .
 H6_4 H 0.5267 0.6609 0.4149 0.036 Uiso 1 1 calc R . . . .
 C7_4 C 0.4524(8) 0.4243(7) 0.4334(5) 0.034(3) Uani 1 1 d . U . . .
 H7A_4 H 0.4605 0.4154 0.3978 0.050 Uiso 1 1 calc GR . . . .
 H7B_4 H 0.4060 0.3933 0.4424 0.050 Uiso 1 1 calc GR . . . .
 H7C_4 H 0.4918 0.4149 0.4535 0.050 Uiso 1 1 calc GR . . . .
 C8_4 C 0.3489(8) 0.6028(9) 0.5262(6) 0.051(5) Uani 1 1 d . . . . .
 H8A_4 H 0.3036 0.6037 0.5087 0.077 Uiso 1 1 calc GR . . . .
 H8B_4 H 0.3704 0.6493 0.5432 0.077 Uiso 1 1 calc GR . . . .
 H8C_4 H 0.3387 0.5669 0.5508 0.077 Uiso 1 1 calc GR . . . .
 S1_5 S 0.78670(19) 0.54644(19) 0.38241(13) 0.0295(9) Uani 1 1 d . U . . .
 C1_5 C 0.8766(7) 0.5804(7) 0.4088(5) 0.026(3) Uani 1 1 d . U . . .
 C2_5 C 0.8944(8) 0.5559(7) 0.4540(5) 0.032(3) Uani 1 1 d . U . . .
 C3_5 C 0.9662(7) 0.5814(7) 0.4714(5) 0.029(3) Uani 1 1 d . U . . .
 H3_5 H 0.9796 0.5667 0.5025 0.035 Uiso 1 1 calc R . . . .
 C4_5 C 1.0191(8) 0.6270(7) 0.4460(5) 0.032(3) Uani 1 1 d . U . . .
 C5_5 C 0.9989(8) 0.6485(7) 0.4007(5) 0.032(3) Uani 1 1 d . U . . .
 H5_5 H 1.0339 0.6789 0.3816 0.038 Uiso 1 1 calc R . . . .
 C6_5 C 0.9288(8) 0.6259(7) 0.3839(5) 0.031(3) Uani 1 1 d . U . . .
 H6_5 H 0.9154 0.6424 0.3535 0.037 Uiso 1 1 calc R . . . .
 C7_5 C 0.8413(7) 0.5082(7) 0.4834(5) 0.033(4) Uani 1 1 d . U . . .
 H7A_5 H 0.7971 0.5249 0.4858 0.049 Uiso 1 1 calc GR . . . .
 H7B_5 H 0.8618 0.5074 0.5171 0.049 Uiso 1 1 calc GR . . . .
 H7C_5 H 0.8296 0.4604 0.4671 0.049 Uiso 1 1 calc GR . . . .
 C8_5 C 1.0958(8) 0.6525(8) 0.4667(6) 0.052(5) Uani 1 1 d . . . . .
 H8A_5 H 1.0955 0.6550 0.5034 0.078 Uiso 1 1 calc GR . . . .
 H8B_5 H 1.1178 0.6996 0.4553 0.078 Uiso 1 1 calc GR . . . .
 H8C_5 H 1.1239 0.6196 0.4549 0.078 Uiso 1 1 calc GR . . . .
 S1_6 S 0.8763(2) 0.81057(18) 0.13110(13) 0.0287(9) Uani 1 1 d . U . . .
 C1_6 C 0.8568(8) 0.8765(7) 0.0940(5) 0.029(3) Uani 1 1 d . U . . .
 C2_6 C 0.9147(8) 0.9175(7) 0.0689(5) 0.034(3) Uani 1 1 d . U . . .
 C3_6 C 0.8991(9) 0.9679(8) 0.0376(5) 0.041(4) Uani 1 1 d . U . . .
 H3_6 H 0.9376 0.9960 0.0199 0.049 Uiso 1 1 calc R . . . .
 C4_6 C 0.8293(9) 0.9781(7) 0.0316(6) 0.038(4) Uani 1 1 d . U . . .
 C5_6 C 0.7754(8) 0.9366(7) 0.0573(5) 0.035(3) Uani 1 1 d . U . . .
 H5_6 H 0.7276 0.9422 0.0538 0.042 Uiso 1 1 calc R . . . .
 C6_6 C 0.7875(8) 0.8866(7) 0.0883(5) 0.034(3) Uani 1 1 d . U . . .
 H6_6 H 0.7484 0.8590 0.1057 0.041 Uiso 1 1 calc R . . . .
 C7_6 C 0.9902(8) 0.9093(8) 0.0711(6) 0.043(4) Uani 1 1 d . U . . .
 H7A_6 H 1.0110 0.9232 0.1049 0.064 Uiso 1 1 calc GR . . . .
 H7B_6 H 1.0196 0.9395 0.0472 0.064 Uiso 1 1 calc GR . . . .
 H7C_6 H 0.9896 0.8598 0.0625 0.064 Uiso 1 1 calc GR . . . .
 C8_6 C 0.8148(10) 1.0297(9) -0.0028(6) 0.060(5) Uani 1 1 d . . . . .
 H8A_6 H 0.8492 1.0758 0.0048 0.091 Uiso 1 1 calc GR . . . .
 H8B_6 H 0.7651 1.0343 0.0014 0.091 Uiso 1 1 calc GR . . . .
 H8C_6 H 0.8203 1.0132 -0.0374 0.091 Uiso 1 1 calc GR . . . .
 S1_7 S 0.7515(2) 0.96584(18) 0.29135(13) 0.0286(9) Uani 1 1 d . U . . .
 C1_7 C 0.7808(7) 1.0202(7) 0.2404(5) 0.028(3) Uani 1 1 d . U . . .
 C2_7 C 0.7704(9) 1.0895(8) 0.2444(6) 0.040(4) Uani 1 1 d . U . . .
 C3_7 C 0.7972(8) 1.1320(8) 0.2057(5) 0.038(3) Uani 1 1 d . U . . .
 H3_7 H 0.7903 1.1784 0.2067 0.046 Uiso 1 1 calc R . . . .
 C4_7 C 0.8337(8) 1.1104(8) 0.1656(6) 0.037(3) Uani 1 1 d . U . . .
 C5_7 C 0.8429(8) 1.0415(7) 0.1637(5) 0.036(3) Uani 1 1 d . U . . .
 H5_7 H 0.8677 1.0249 0.1370 0.043 Uiso 1 1 calc R . . . .
 C6_7 C 0.8156(7) 0.9986(8) 0.2010(5) 0.033(3) Uani 1 1 d . U . . .
 H6_7 H 0.8212 0.9517 0.1993 0.039 Uiso 1 1 calc R . . . .
 C7_7 C 0.7342(10) 1.1162(8) 0.2873(6) 0.051(4) Uani 1 1 d . U . . .
 H7A_7 H 0.6857 1.0848 0.2904 0.077 Uiso 1 1 calc GR . . . .
 H7B_7 H 0.7300 1.1640 0.2816 0.077 Uiso 1 1 calc GR . . . .
 H7C_7 H 0.7630 1.1175 0.3181 0.077 Uiso 1 1 calc GR . . . .
 C8_7 C 0.8641(9) 1.1590(8) 0.1258(6) 0.057(5) Uani 1 1 d . . . . .
 H8A_7 H 0.8329 1.1909 0.1206 0.085 Uiso 1 1 calc GR . . . .
 H8B_7 H 0.8662 1.1311 0.0945 0.085 Uiso 1 1 calc GR . . . .
 H8C_7 H 0.9131 1.1868 0.1361 0.085 Uiso 1 1 calc GR . . . .
 S1_8 S 0.59504(19) 0.85486(18) 0.38205(13) 0.0273(8) Uani 1 1 d . U . . .
 C1_8 C 0.5035(7) 0.8247(7) 0.4002(5) 0.029(3) Uani 1 1 d . U . . .
 C2_8 C 0.4826(8) 0.8444(8) 0.4468(5) 0.034(3) Uani 1 1 d . U . . .
 C3_8 C 0.4105(7) 0.8185(7) 0.4596(5) 0.031(3) Uani 1 1 d . U . . .
 H3_8 H 0.3963 0.8314 0.4919 0.037 Uiso 1 1 calc R . . . .
 C4_8 C 0.3580(7) 0.7745(7) 0.4270(5) 0.031(3) Uani 1 1 d . U . . .
 C5_8 C 0.3794(8) 0.7567(8) 0.3804(6) 0.039(4) Uani 1 1 d . U . . .
 H5_8 H 0.3451 0.7278 0.3569 0.046 Uiso 1 1 calc R . . . .
 C6_8 C 0.4513(7) 0.7811(7) 0.3677(6) 0.033(3) Uani 1 1 d . U . . .
 H6_8 H 0.4655 0.7674 0.3355 0.040 Uiso 1 1 calc R . . . .
 C7_8 C 0.5347(9) 0.8923(9) 0.4825(6) 0.056(5) Uani 1 1 d . U . . .
 H7A_8 H 0.5734 0.8700 0.4914 0.084 Uiso 1 1 calc GR . . . .
 H7B_8 H 0.5096 0.9019 0.5127 0.084 Uiso 1 1 calc GR . . . .
 H7C_8 H 0.5559 0.9368 0.4672 0.084 Uiso 1 1 calc GR . . . .
 C8_8 C 0.2821(8) 0.7438(9) 0.4432(6) 0.050(5) Uani 1 1 d . . . . .
 H8A_8 H 0.2796 0.6990 0.4584 0.075 Uiso 1 1 calc GR . . . .
 H8B_8 H 0.2486 0.7354 0.4141 0.075 Uiso 1 1 calc GR . . . .
 H8C_8 H 0.2687 0.7770 0.4677 0.075 Uiso 1 1 calc GR . . . .
 S1_9 S 0.9665(2) 0.94531(19) 0.28586(14) 0.0326(9) Uani 1 1 d . U . . .
 C1_9 C 0.9712(8) 1.0355(7) 0.2745(5) 0.031(3) Uani 1 1 d . U . . .
 C2_9 C 1.0094(8) 1.0642(8) 0.2340(6) 0.039(3) Uani 1 1 d . U . . .
 C3_9 C 1.0117(9) 1.1346(8) 0.2268(6) 0.052(4) Uani 1 1 d . U . . .
 H3_9 H 1.0374 1.1563 0.1993 0.062 Uiso 1 1 calc R . . . .
 C4_9 C 0.9777(9) 1.1744(9) 0.2584(7) 0.052(4) Uani 1 1 d . U . . .
 C5_9 C 0.9423(9) 1.1445(8) 0.2981(6) 0.051(4) Uani 1 1 d . U . . .
 H5_9 H 0.9194 1.1715 0.3199 0.061 Uiso 1 1 calc R . . . .
 C6_9 C 0.9389(8) 1.0760(8) 0.3073(6) 0.040(3) Uani 1 1 d . U . . .
 H6_9 H 0.9149 1.0560 0.3358 0.047 Uiso 1 1 calc R . . . .
 C7_9 C 1.0442(10) 1.0241(9) 0.1969(6) 0.066(5) Uani 1 1 d . U . . .
 H7A_9 H 1.0694 0.9945 0.2146 0.099 Uiso 1 1 calc GR . . . .
 H7B_9 H 1.0791 1.0574 0.1778 0.099 Uiso 1 1 calc GR . . . .
 H7C_9 H 1.0068 0.9940 0.1740 0.099 Uiso 1 1 calc GR . . . .
 C8_9 C 0.9791(13) 1.2515(9) 0.2492(8) 0.103(9) Uani 1 1 d . . . . .
 H8A_9 H 1.0225 1.2727 0.2309 0.155 Uiso 1 1 calc GR . . . .
 H8B_9 H 0.9799 1.2784 0.2814 0.155 Uiso 1 1 calc GR . . . .
 H8C_9 H 0.9357 1.2526 0.2295 0.155 Uiso 1 1 calc GR . . . .
 S1_10 S 0.85752(19) 0.59306(18) 0.14141(13) 0.0284(9) Uani 1 1 d . U . . .
 C1_10 C 0.8245(8) 0.5046(7) 0.1154(5) 0.030(3) Uani 1 1 d . U . . .
 C2_10 C 0.8532(8) 0.4829(8) 0.0717(5) 0.034(3) Uani 1 1 d . U . . .
 C3_10 C 0.8282(8) 0.4123(8) 0.0537(5) 0.039(3) Uani 1 1 d . U . . .
 H3_10 H 0.8483 0.3971 0.0242 0.046 Uiso 1 1 calc R . . . .
 C4_10 C 0.7758(8) 0.3639(8) 0.0768(6) 0.042(4) Uani 1 1 d . U . . .
 C5_10 C 0.7461(9) 0.3873(8) 0.1185(6) 0.045(4) Uani 1 1 d . U . . .
 H5_10 H 0.7088 0.3553 0.1347 0.054 Uiso 1 1 calc R . . . .
 C6_10 C 0.7696(8) 0.4574(8) 0.1376(5) 0.034(3) Uani 1 1 d . U . . .
 H6_10 H 0.7476 0.4727 0.1663 0.041 Uiso 1 1 calc R . . . .
 C7_10 C 0.9117(9) 0.5320(8) 0.0463(6) 0.056(5) Uani 1 1 d . U . . .
 H7A_10 H 0.8934 0.5706 0.0341 0.084 Uiso 1 1 calc GR . . . .
 H7B_10 H 0.9279 0.5064 0.0180 0.084 Uiso 1 1 calc GR . . . .
 H7C_10 H 0.9526 0.5516 0.0699 0.084 Uiso 1 1 calc GR . . . .
 C8_10 C 0.7496(10) 0.2882(8) 0.0556(7) 0.065(6) Uani 1 1 d . . . . .
 H8A_10 H 0.7499 0.2870 0.0190 0.098 Uiso 1 1 calc GR . . . .
 H8B_10 H 0.7002 0.2679 0.0664 0.098 Uiso 1 1 calc GR . . . .
 H8C_10 H 0.7819 0.2605 0.0677 0.098 Uiso 1 1 calc GR . . . .
 S1_11 S 0.79900(18) 0.86658(18) 0.41117(13) 0.0263(8) Uani 1 1 d . U . . .
 C1_11 C 0.8629(7) 0.8443(7) 0.4526(5) 0.024(3) Uani 1 1 d . U . . .
 C2_11 C 0.9010(8) 0.8937(8) 0.4885(6) 0.041(4) Uani 1 1 d . U . . .
 C3_11 C 0.9488(8) 0.8747(8) 0.5203(6) 0.041(4) Uani 1 1 d . U . . .
 H3_11 H 0.9754 0.9092 0.5447 0.050 Uiso 1 1 calc R . . . .
 C4_11 C 0.9599(8) 0.8079(8) 0.5184(5) 0.034(3) Uani 1 1 d . U . . .
 C5_11 C 0.9201(8) 0.7582(8) 0.4822(5) 0.036(3) Uani 1 1 d . U . . .
 H5_11 H 0.9248 0.7110 0.4804 0.043 Uiso 1 1 calc R . . . .
 C6_11 C 0.8751(8) 0.7776(8) 0.4499(5) 0.035(3) Uani 1 1 d . U . . .
 H6_11 H 0.8507 0.7442 0.4241 0.042 Uiso 1 1 calc R . . . .
 C7_11 C 0.8906(9) 0.9683(8) 0.4944(6) 0.053(5) Uani 1 1 d . U . . .
 H7A_11 H 0.9019 0.9915 0.4631 0.080 Uiso 1 1 calc GR . . . .
 H7B_11 H 0.9230 0.9954 0.5214 0.080 Uiso 1 1 calc GR . . . .
 H7C_11 H 0.8401 0.9659 0.5026 0.080 Uiso 1 1 calc GR . . . .
 C8_11 C 1.0123(9) 0.7871(9) 0.5542(6) 0.059(5) Uani 1 1 d . . . . .
 H8A_11 H 1.0592 0.7918 0.5384 0.088 Uiso 1 1 calc GR . . . .
 H8B_11 H 0.9926 0.7380 0.5624 0.088 Uiso 1 1 calc GR . . . .
 H8C_11 H 1.0189 0.8182 0.5849 0.088 Uiso 1 1 calc GR . . . .
 S1_12 S 0.6448(2) 0.43452(18) 0.27826(14) 0.0318(9) Uani 1 1 d . U . . .
 C1_12 C 0.6127(7) 0.3729(7) 0.2257(5) 0.028(3) Uani 1 1 d . U . . .
 C2_12 C 0.6176(7) 0.3042(7) 0.2275(5) 0.031(3) Uani 1 1 d . U . . .
 C3_12 C 0.5865(8) 0.2563(7) 0.1875(5) 0.036(3) Uani 1 1 d . U . . .
 H3_12 H 0.5877 0.2083 0.1890 0.044 Uiso 1 1 calc R . . . .
 C4_12 C 0.5540(8) 0.2755(8) 0.1459(5) 0.036(3) Uani 1 1 d . U . . .
 C5_12 C 0.5533(8) 0.3475(7) 0.1453(5) 0.036(4) Uani 1 1 d . U . . .
 H5_12 H 0.5329 0.3633 0.1169 0.043 Uiso 1 1 calc R . . . .
 C6_12 C 0.5812(7) 0.3947(8) 0.1845(5) 0.033(3) Uani 1 1 d . U . . .
 H6_12 H 0.5792 0.4426 0.1837 0.040 Uiso 1 1 calc R . . . .
 C7_12 C 0.6513(8) 0.2789(8) 0.2712(6) 0.043(4) Uani 1 1 d . U . . .
 H7A_12 H 0.7041 0.2979 0.2713 0.065 Uiso 1 1 calc GR . . . .
 H7B_12 H 0.6396 0.2271 0.2687 0.065 Uiso 1 1 calc GR . . . .
 H7C_12 H 0.6324 0.2952 0.3023 0.065 Uiso 1 1 calc GR . . . .
 C8_12 C 0.5238(9) 0.2225(8) 0.1028(6) 0.048(4) Uani 1 1 d . . . . .
 H8A_12 H 0.5536 0.2344 0.0735 0.072 Uiso 1 1 calc GR . . . .
 H8B_12 H 0.4738 0.2237 0.0948 0.072 Uiso 1 1 calc GR . . . .
 H8C_12 H 0.5244 0.1750 0.1120 0.072 Uiso 1 1 calc GR . . . .
 S1_13 S 0.5361(2) 0.58265(18) 0.11090(13) 0.0297(9) Uani 1 1 d . U . . .
 C1_13 C 0.5509(9) 0.5069(7) 0.0755(5) 0.035(3) Uani 1 1 d . U . . .
 C2_13 C 0.4895(9) 0.4569(7) 0.0534(5) 0.040(3) Uani 1 1 d . U . . .
 C3_13 C 0.5040(11) 0.4022(8) 0.0237(6) 0.054(4) Uani 1 1 d . U . . .
 H3_13 H 0.4636 0.3676 0.0090 0.064 Uiso 1 1 calc R . . . .
 C4_13 C 0.5713(11) 0.3939(8) 0.0137(6) 0.051(4) Uani 1 1 d . U . . .
 C5_13 C 0.6287(10) 0.4422(7) 0.0373(5) 0.043(3) Uani 1 1 d . U . . .
 H5_13 H 0.6764 0.4369 0.0326 0.052 Uiso 1 1 calc R . . . .
 C6_13 C 0.6194(8) 0.4980(7) 0.0674(5) 0.035(3) Uani 1 1 d . U . . .
 H6_13 H 0.6605 0.5309 0.0828 0.042 Uiso 1 1 calc R . . . .
 C7_13 C 0.4130(8) 0.4614(8) 0.0634(6) 0.048(4) Uani 1 1 d . U . . .
 H7A_13 H 0.4031 0.4551 0.0988 0.072 Uiso 1 1 calc GR . . . .
 H7B_13 H 0.3786 0.4242 0.0429 0.072 Uiso 1 1 calc GR . . . .
 H7C_13 H 0.4075 0.5078 0.0549 0.072 Uiso 1 1 calc GR . . . .
 C8_13 C 0.5847(12) 0.3357(9) -0.0216(7) 0.084(7) Uani 1 1 d . . . . .
 H8A_13 H 0.5638 0.2897 -0.0082 0.126 Uiso 1 1 calc GR . . . .
 H8B_13 H 0.6370 0.3423 -0.0252 0.126 Uiso 1 1 calc GR . . . .
 H8C_13 H 0.5619 0.3375 -0.0544 0.126 Uiso 1 1 calc GR . . . .
 S1_14 S 0.42428(19) 0.64960(19) 0.21980(13) 0.0285(9) Uani 1 1 d . U . . .
 C1_14 C 0.3654(7) 0.6246(7) 0.2698(5) 0.027(3) Uani 1 1 d . U . . .
 C2_14 C 0.2924(7) 0.6229(7) 0.2642(5) 0.030(3) Uani 1 1 d . U . . .
 C3_14 C 0.2469(8) 0.5984(7) 0.3027(5) 0.038(3) Uani 1 1 d . U . . .
 H3_14 H 0.1970 0.5973 0.2989 0.045 Uiso 1 1 calc R . . . .
 C4_14 C 0.2699(8) 0.5754(8) 0.3465(6) 0.039(4) Uani 1 1 d . U . . .
 C5_14 C 0.3436(8) 0.5780(7) 0.3520(5) 0.037(4) Uani 1 1 d . U . . .
 H5_14 H 0.3615 0.5632 0.3816 0.045 Uiso 1 1 calc R . . . .
 C6_14 C 0.3899(8) 0.6019(7) 0.3145(5) 0.036(3) Uani 1 1 d . U . . .
 H6_14 H 0.4398 0.6033 0.3186 0.043 Uiso 1 1 calc R . . . .
 C7_14 C 0.2625(8) 0.6443(8) 0.2167(6) 0.042(4) Uani 1 1 d . U . . .
 H7A_14 H 0.2848 0.6945 0.2125 0.064 Uiso 1 1 calc GR . . . .
 H7B_14 H 0.2098 0.6366 0.2187 0.064 Uiso 1 1 calc GR . . . .
 H7C_14 H 0.2736 0.6158 0.1880 0.064 Uiso 1 1 calc GR . . . .
 C8_14 C 0.2196(8) 0.5458(9) 0.3870(6) 0.056(5) Uani 1 1 d . . . . .
 H8A_14 H 0.1779 0.5666 0.3868 0.084 Uiso 1 1 calc GR . . . .
 H8B_14 H 0.2455 0.5573 0.4195 0.084 Uiso 1 1 calc GR . . . .
 H8C_14 H 0.2026 0.4944 0.3810 0.084 Uiso 1 1 calc GR . . . .
 S1_15 S 0.66471(19) 0.68952(19) 0.48022(13) 0.0303(9) Uani 1 1 d . U . . .
 C1_15 C 0.7331(7) 0.7141(8) 0.5295(5) 0.027(3) Uani 1 1 d . U . . .
 C2_15 C 0.7461(9) 0.7784(9) 0.5572(6) 0.048(4) Uani 1 1 d . U . . .
 C3_15 C 0.7971(9) 0.7892(9) 0.5970(6) 0.050(4) Uani 1 1 d . U . . .
 H3_15 H 0.8082 0.8336 0.6157 0.060 Uiso 1 1 calc R . . . .
 C4_15 C 0.8316(8) 0.7400(9) 0.6107(6) 0.043(4) Uani 1 1 d . U . . .
 C5_15 C 0.8165(8) 0.6783(9) 0.5829(5) 0.044(4) Uani 1 1 d . U . . .
 H5_15 H 0.8401 0.6433 0.5916 0.052 Uiso 1 1 calc R . . . .
 C6_15 C 0.7685(8) 0.6635(9) 0.5425(5) 0.040(3) Uani 1 1 d . U . . .
 H6_15 H 0.7595 0.6192 0.5238 0.048 Uiso 1 1 calc R . . . .
 C7_15 C 0.7099(11) 0.8342(9) 0.5448(6) 0.067(5) Uani 1 1 d . U . . .
 H7A_15 H 0.7192 0.8458 0.5100 0.100 Uiso 1 1 calc GR . . . .
 H7B_15 H 0.7292 0.8766 0.5671 0.100 Uiso 1 1 calc GR . . . .
 H7C_15 H 0.6576 0.8171 0.5490 0.100 Uiso 1 1 calc GR . . . .
 C8_15 C 0.8843(9) 0.7559(9) 0.6555(6) 0.060(5) Uani 1 1 d . . . . .
 H8A_15 H 0.9090 0.8064 0.6583 0.091 Uiso 1 1 calc GR . . . .
 H8B_15 H 0.9203 0.7283 0.6512 0.091 Uiso 1 1 calc GR . . . .
 H8C_15 H 0.8575 0.7431 0.6860 0.091 Uiso 1 1 calc GR . . . .
 S1_16 S 0.4272(2) 0.43209(19) 0.23266(14) 0.0339(9) Uani 1 1 d . U . . .
 C1_16 C 0.3349(8) 0.4371(7) 0.2401(5) 0.034(3) Uani 1 1 d . U . . .
 C2_16 C 0.2965(8) 0.4107(7) 0.2813(5) 0.035(3) Uani 1 1 d . U . . .
 C3_16 C 0.2221(8) 0.4092(7) 0.2819(6) 0.035(3) Uani 1 1 d . U . . .
 H3_16 H 0.1951 0.3916 0.3100 0.042 Uiso 1 1 calc R . . . .
 C4_16 C 0.1872(8) 0.4322(7) 0.2437(6) 0.037(3) Uani 1 1 d . U . . .
 C5_16 C 0.2266(8) 0.4572(7) 0.2037(6) 0.038(3) Uani 1 1 d . U . . .
 H5_16 H 0.2035 0.4735 0.1769 0.046 Uiso 1 1 calc R . . . .
 C6_16 C 0.2993(8) 0.4595(7) 0.2013(5) 0.035(3) Uani 1 1 d . U . . .
 H6_16 H 0.3253 0.4766 0.1727 0.042 Uiso 1 1 calc R . . . .
 C7_16 C 0.3307(9) 0.3867(9) 0.3260(6) 0.054(5) Uani 1 1 d . U . . .
 H7A_16 H 0.3586 0.3535 0.3146 0.081 Uiso 1 1 calc GR . . . .
 H7B_16 H 0.2926 0.3634 0.3480 0.081 Uiso 1 1 calc GR . . . .
 H7C_16 H 0.3630 0.4278 0.3443 0.081 Uiso 1 1 calc GR . . . .
 C8_16 C 0.1087(8) 0.4310(9) 0.2479(7) 0.058(5) Uani 1 1 d . . . . .
 H8A_16 H 0.0876 0.4008 0.2746 0.088 Uiso 1 1 calc GR . . . .
 H8B_16 H 0.0829 0.4121 0.2161 0.088 Uiso 1 1 calc GR . . . .
 H8C_16 H 0.1041 0.4791 0.2556 0.088 Uiso 1 1 calc GR . . . .
 S1_17 S 0.7057(2) 0.67604(19) 0.03334(14) 0.0328(9) Uani 1 1 d . U . . .
 C1_17 C 0.7709(8) 0.7372(7) 0.0008(5) 0.033(3) Uani 1 1 d . U . . .
 C2_17 C 0.7521(9) 0.7880(8) -0.0263(6) 0.043(4) Uani 1 1 d . U . . .
 C3_17 C 0.8062(9) 0.8322(9) -0.0529(6) 0.048(4) Uani 1 1 d . U . . .
 H3_17 H 0.7949 0.8687 -0.0707 0.057 Uiso 1 1 calc R . . . .
 C4_17 C 0.8751(9) 0.8236(9) -0.0534(6) 0.047(4) Uani 1 1 d . U . . .
 C5_17 C 0.8940(9) 0.7718(8) -0.0263(6) 0.048(4) Uani 1 1 d . U . . .
 H5_17 H 0.9425 0.7676 -0.0257 0.058 Uiso 1 1 calc R . . . .
 C6_17 C 0.8435(8) 0.7288(8) -0.0016(6) 0.043(4) Uani 1 1 d . U . . .
 H6_17 H 0.8555 0.6914 0.0149 0.051 Uiso 1 1 calc R . . . .
 C7_17 C 0.6794(9) 0.7991(9) -0.0265(6) 0.049(4) Uani 1 1 d . U . . .
 H7A_17 H 0.6442 0.7551 -0.0383 0.073 Uiso 1 1 calc GR . . . .
 H7B_17 H 0.6772 0.8364 -0.0488 0.073 Uiso 1 1 calc GR . . . .
 H7C_17 H 0.6680 0.8132 0.0075 0.073 Uiso 1 1 calc GR . . . .
 C8_17 C 0.9338(10) 0.8745(10) -0.0814(7) 0.074(6) Uani 1 1 d . . . . .
 H8A_17 H 0.9379 0.8535 -0.1150 0.111 Uiso 1 1 calc GR . . . .
 H8B_17 H 0.9804 0.8832 -0.0631 0.111 Uiso 1 1 calc GR . . . .
 H8C_17 H 0.9205 0.9193 -0.0840 0.111 Uiso 1 1 calc GR . . . .
 S1_18 S 0.9043(2) 0.5060(2) 0.26914(14) 0.0367(10) Uani 1 1 d . U . . .
 C1_18 C 0.9314(8) 0.4692(7) 0.2131(5) 0.032(3) Uani 1 1 d . U . . .
 C2_18 C 0.9017(9) 0.3974(8) 0.1971(6) 0.039(3) Uani 1 1 d . U . . .
 C3_18 C 0.9286(10) 0.3716(9) 0.1542(6) 0.053(4) Uani 1 1 d . U . . .
 H3_18 H 0.9079 0.3238 0.1426 0.064 Uiso 1 1 calc R . . . .
 C4_18 C 0.9840(10) 0.4117(10) 0.1275(6) 0.056(4) Uani 1 1 d . U . . .
 C5_18 C 1.0125(10) 0.4802(10) 0.1441(6) 0.060(5) Uani 1 1 d . U . . .
 H5_18 H 1.0512 0.5082 0.1266 0.072 Uiso 1 1 calc R . . . .
 C6_18 C 0.9871(8) 0.5105(9) 0.1858(6) 0.045(4) Uani 1 1 d . U . . .
 H6_18 H 1.0073 0.5590 0.1959 0.054 Uiso 1 1 calc R . . . .
 C7_18 C 0.8417(9) 0.3523(8) 0.2243(6) 0.054(4) Uani 1 1 d . U . . .
 H7A_18 H 0.8565 0.3526 0.2595 0.081 Uiso 1 1 calc GR . . . .
 H7B_18 H 0.8303 0.3037 0.2092 0.081 Uiso 1 1 calc GR . . . .
 H7C_18 H 0.7987 0.3708 0.2220 0.081 Uiso 1 1 calc GR . . . .
 C8_18 C 1.0119(13) 0.3801(12) 0.0802(7) 0.099(8) Uani 1 1 d . . . . .
 H8A_18 H 1.0060 0.3293 0.0831 0.148 Uiso 1 1 calc GR . . . .
 H8B_18 H 1.0634 0.4034 0.0767 0.148 Uiso 1 1 calc GR . . . .
 H8C_18 H 0.9841 0.3874 0.0508 0.148 Uiso 1 1 calc GR . . . .

loop_
  _atom_site_aniso_label
  _atom_site_aniso_U_11
  _atom_site_aniso_U_22
  _atom_site_aniso_U_33
  _atom_site_aniso_U_23
  _atom_site_aniso_U_13
  _atom_site_aniso_U_12
 Ag01 0.0176(5) 0.0141(5) 0.0172(5) 0.0039(4) 0.0003(4) 0.0013(4)
 Ag02 0.0204(6) 0.0207(6) 0.0260(6) 0.0050(5) 0.0019(5) 0.0034(4)
 Ag03 0.0253(6) 0.0211(6) 0.0219(6) 0.0056(5) -0.0020(5) 0.0042(5)
 Ag04 0.0263(6) 0.0163(5) 0.0255(6) 0.0029(5) 0.0006(5) 0.0041(5)
 Ag05 0.0230(6) 0.0219(6) 0.0205(6) 0.0023(5) 0.0001(5) 0.0022(5)
 Ag06 0.0259(6) 0.0224(6) 0.0211(6) 0.0051(5) 0.0000(5) 0.0057(5)
 Ag07 0.0198(6) 0.0249(6) 0.0248(6) 0.0067(5) -0.0014(5) 0.0023(5)
 Ag08 0.0274(6) 0.0168(5) 0.0254(6) 0.0062(5) 0.0003(5) 0.0018(5)
 Ag09 0.0255(6) 0.0245(6) 0.0222(6) 0.0085(5) 0.0022(5) 0.0018(5)
 Ag0A 0.0249(6) 0.0203(6) 0.0227(6) 0.0063(5) 0.0030(5) 0.0009(5)
 Ag0B 0.0276(6) 0.0204(6) 0.0200(6) 0.0039(5) -0.0018(5) 0.0011(5)
 Ag0C 0.0256(6) 0.0240(6) 0.0232(6) 0.0033(5) 0.0017(5) 0.0053(5)
 Ag0D 0.0263(6) 0.0219(6) 0.0212(6) 0.0031(5) 0.0011(5) 0.0050(5)
 Ag0E 0.0312(7) 0.0333(7) 0.0273(6) 0.0077(5) 0.0040(5) 0.0093(5)
 Ag0F 0.0343(7) 0.0279(6) 0.0337(7) 0.0072(5) 0.0022(5) 0.0016(5)
 Ag0G 0.0334(7) 0.0343(7) 0.0279(6) 0.0080(5) -0.0009(5) -0.0039(5)
 Ag0H 0.0417(7) 0.0342(7) 0.0244(6) 0.0076(5) 0.0021(5) 0.0118(6)
 Ag0I 0.0353(7) 0.0243(6) 0.0475(7) 0.0037(6) 0.0005(6) 0.0084(5)
 Ag0J 0.0334(7) 0.0343(7) 0.0338(7) 0.0059(5) 0.0018(5) -0.0024(5)
 Ag0K 0.0393(7) 0.0340(7) 0.0289(6) 0.0087(5) -0.0015(6) -0.0072(6)
 Ag0L 0.0431(8) 0.0405(7) 0.0283(6) 0.0032(6) -0.0011(6) 0.0151(6)
 Ag0M 0.0329(7) 0.0325(7) 0.0393(7) 0.0048(6) 0.0015(6) 0.0092(5)
 Ag0N 0.0295(7) 0.0311(7) 0.0508(8) 0.0048(6) -0.0005(6) 0.0090(5)
 Ag0O 0.0386(7) 0.0263(6) 0.0426(7) 0.0084(6) 0.0006(6) 0.0070(5)
 Ag0P 0.0416(7) 0.0431(7) 0.0252(6) 0.0082(5) 0.0016(5) 0.0130(6)
 P018 0.038(3) 0.048(3) 0.065(3) 0.027(2) 0.017(2) 0.013(2)
 Cl01 0.087(4) 0.060(3) 0.105(4) 0.005(3) -0.033(3) 0.004(3)
 Cl0A 0.104(5) 0.065(4) 0.177(7) 0.005(4) 0.054(5) 0.019(4)
 C02X 0.044(9) 0.047(8) 0.055(8) 0.017(6) 0.006(7) 0.001(6)
 C03G 0.067(8) 0.030(7) 0.037(8) -0.006(6) 0.008(6) 0.014(6)
 C03L 0.050(7) 0.038(7) 0.049(8) 0.007(6) 0.003(5) 0.015(5)
 C03R 0.034(7) 0.055(7) 0.068(7) 0.034(5) 0.017(5) 0.005(5)
 C03T 0.038(9) 0.055(7) 0.076(9) 0.030(6) 0.012(7) 0.005(6)
 C04B 0.050(7) 0.043(8) 0.065(10) -0.004(7) 0.000(6) 0.017(6)
 C04H 0.060(13) 0.049(12) 0.082(14) 0.012(10) -0.011(11) 0.009(10)
 C04J 0.061(8) 0.043(8) 0.085(7) 0.035(6) 0.035(6) 0.023(7)
 C04V 0.048(7) 0.055(6) 0.057(8) 0.026(5) 0.013(6) 0.010(5)
 C04X 0.085(12) 0.057(8) 0.071(10) 0.001(7) 0.042(9) -0.022(8)
 C052 0.065(10) 0.050(8) 0.063(9) 0.020(6) 0.018(7) 0.007(6)
 C05A 0.050(10) 0.056(8) 0.083(10) 0.031(7) 0.005(8) -0.005(7)
 C05C 0.090(9) 0.029(7) 0.047(9) -0.012(6) -0.012(7) 0.018(7)
 C05E 0.086(12) 0.058(8) 0.082(10) 0.003(7) 0.044(9) -0.021(8)
 C05I 0.094(10) 0.108(13) 0.059(12) 0.031(10) 0.019(9) 0.024(8)
 C05J 0.070(10) 0.058(11) 0.088(7) 0.024(7) 0.033(7) 0.035(8)
 C05K 0.078(11) 0.074(11) 0.113(10) 0.062(9) 0.057(8) 0.044(9)
 C05N 0.088(9) 0.041(9) 0.073(11) -0.011(8) -0.014(8) 0.025(7)
 C05O 0.069(9) 0.081(12) 0.112(10) 0.064(8) 0.050(7) 0.040(8)
 C05Q 0.064(9) 0.053(7) 0.067(9) 0.025(6) 0.019(7) 0.013(6)
 C05R 0.073(11) 0.096(13) 0.061(13) -0.006(10) 0.013(10) 0.016(9)
 C05T 0.075(9) 0.041(9) 0.077(11) -0.011(7) -0.016(7) 0.025(7)
 C05U 0.091(12) 0.055(11) 0.097(9) 0.025(7) 0.044(8) 0.040(9)
 C05X 0.082(14) 0.071(9) 0.114(11) 0.050(8) -0.022(11) -0.020(9)
 C060 0.089(10) 0.091(12) 0.115(17) 0.010(11) 0.032(10) 0.026(8)
 C061 0.125(19) 0.069(9) 0.137(13) 0.060(8) -0.065(13) -0.034(9)
 C062 0.079(12) 0.143(18) 0.072(15) 0.002(13) 0.032(11) 0.012(10)
 C063 0.100(15) 0.068(9) 0.124(11) 0.056(8) -0.047(11) -0.022(8)
 C065 0.081(11) 0.104(13) 0.083(14) 0.004(11) 0.013(10) 0.010(9)
 C 0.094(12) 0.079(12) 0.115(11) 0.057(9) 0.055(8) 0.048(10)
 C0AA 0.099(11) 0.150(17) 0.108(18) 0.010(14) 0.032(11) 0.013(10)
 S1_1 0.035(2) 0.032(2) 0.032(2) 0.0068(17) 0.0020(18) 0.0114(18)
 C1_1 0.026(5) 0.023(7) 0.032(5) 0.008(5) -0.002(4) 0.009(4)
 C2_1 0.024(5) 0.037(8) 0.050(6) -0.001(6) -0.002(4) 0.006(5)
 C3_1 0.031(7) 0.045(8) 0.050(6) 0.001(6) 0.003(5) 0.009(6)
 C4_1 0.043(6) 0.027(7) 0.045(6) 0.005(5) -0.003(5) 0.013(5)
 C5_1 0.044(6) 0.057(10) 0.044(7) -0.008(6) -0.004(5) 0.011(6)
 C6_1 0.038(7) 0.034(8) 0.042(6) 0.000(5) -0.005(5) 0.008(5)
 C7_1 0.030(8) 0.093(13) 0.088(10) -0.043(10) -0.013(8) 0.008(8)
 C8_1 0.070(11) 0.060(12) 0.063(8) -0.002(8) 0.018(8) 0.015(9)
 S1_2 0.025(2) 0.029(2) 0.031(2) 0.0075(17) -0.0002(16) 0.0062(16)
 C1_2 0.031(5) 0.020(7) 0.030(5) 0.005(5) -0.002(4) 0.006(5)
 C2_2 0.029(5) 0.021(7) 0.039(6) 0.004(5) -0.002(4) 0.004(5)
 C3_2 0.029(6) 0.027(7) 0.042(6) 0.009(5) -0.002(5) 0.001(5)
 C4_2 0.041(6) 0.029(8) 0.035(6) 0.011(5) -0.005(5) 0.008(5)
 C5_2 0.041(6) 0.021(7) 0.030(6) 0.005(5) -0.002(5) 0.009(5)
 C6_2 0.033(6) 0.019(7) 0.032(5) 0.007(5) 0.002(4) 0.008(5)
 C7_2 0.029(8) 0.049(9) 0.045(7) -0.003(6) -0.008(6) 0.018(7)
 C8_2 0.042(11) 0.048(11) 0.067(12) 0.010(10) -0.001(9) 0.007(9)
 S1_3 0.026(2) 0.0214(19) 0.032(2) 0.0086(16) -0.0009(17) 0.0032(15)
 C1_3 0.022(7) 0.024(5) 0.037(6) 0.011(4) 0.003(5) 0.004(4)
 C2_3 0.027(7) 0.026(5) 0.037(6) 0.009(4) 0.004(5) 0.007(4)
 C3_3 0.027(7) 0.027(5) 0.034(6) 0.013(4) 0.006(5) 0.010(4)
 C4_3 0.031(8) 0.030(6) 0.046(7) 0.006(5) 0.004(5) 0.009(5)
 C5_3 0.032(8) 0.029(6) 0.044(7) 0.006(5) -0.001(6) -0.002(5)
 C6_3 0.025(7) 0.029(5) 0.038(6) 0.006(4) 0.006(5) 0.002(5)
 C7_3 0.045(8) 0.031(7) 0.035(7) 0.011(5) -0.003(6) 0.004(6)
 C8_3 0.071(13) 0.014(8) 0.081(13) 0.023(9) -0.003(11) 0.004(8)
 S1_4 0.026(2) 0.025(2) 0.0264(19) 0.0084(16) 0.0003(16) -0.0035(16)
 C1_4 0.022(6) 0.028(5) 0.020(6) 0.007(4) -0.004(5) 0.002(4)
 C2_4 0.023(6) 0.030(5) 0.020(6) 0.008(4) -0.003(5) 0.003(4)
 C3_4 0.026(7) 0.032(6) 0.028(7) 0.009(5) 0.006(5) 0.001(5)
 C4_4 0.028(7) 0.039(6) 0.039(7) 0.007(5) -0.002(6) 0.006(5)
 C5_4 0.028(7) 0.037(6) 0.042(7) 0.007(5) -0.002(6) 0.012(5)
 C6_4 0.025(7) 0.027(5) 0.036(7) 0.006(5) -0.003(5) 0.001(5)
 C7_4 0.034(8) 0.030(6) 0.036(8) 0.009(5) 0.003(7) 0.005(5)
 C8_4 0.021(9) 0.064(12) 0.064(12) 0.002(10) 0.010(9) 0.003(8)
 S1_5 0.030(2) 0.027(2) 0.031(2) 0.0089(17) -0.0078(17) 0.0045(16)
 C1_5 0.029(5) 0.021(6) 0.027(5) 0.007(5) -0.001(4) 0.006(4)
 C2_5 0.037(6) 0.030(7) 0.027(6) 0.009(5) -0.007(4) 0.004(5)
 C3_5 0.036(5) 0.022(7) 0.029(6) 0.012(5) -0.008(4) 0.002(5)
 C4_5 0.036(6) 0.023(7) 0.036(6) 0.010(5) 0.000(5) 0.008(5)
 C5_5 0.034(6) 0.027(7) 0.035(6) 0.009(5) 0.003(5) 0.008(5)
 C6_5 0.037(5) 0.026(7) 0.030(6) 0.006(5) 0.001(5) 0.006(5)
 C7_5 0.034(7) 0.036(8) 0.024(7) 0.010(6) -0.011(5) 0.000(6)
 C8_5 0.039(10) 0.047(11) 0.069(12) 0.018(9) -0.008(9) 0.008(8)
 S1_6 0.031(2) 0.026(2) 0.029(2) 0.0087(16) 0.0091(17) 0.0052(16)
 C1_6 0.036(5) 0.024(6) 0.023(6) 0.001(5) 0.008(5) 0.002(4)
 C2_6 0.039(6) 0.032(7) 0.028(7) 0.006(6) 0.010(5) 0.004(5)
 C3_6 0.045(6) 0.044(8) 0.034(8) 0.015(6) 0.015(6) 0.008(6)
 C4_6 0.049(6) 0.027(7) 0.040(8) 0.012(6) 0.013(6) 0.010(5)
 C5_6 0.043(7) 0.030(7) 0.031(7) 0.006(6) 0.009(5) 0.008(5)
 C6_6 0.036(6) 0.029(7) 0.035(7) 0.009(6) 0.009(5) 0.004(5)
 C7_6 0.039(6) 0.051(10) 0.043(9) 0.025(8) 0.018(6) 0.013(6)
 C8_6 0.072(14) 0.062(13) 0.055(12) 0.024(10) -0.001(10) 0.028(10)
 S1_7 0.035(2) 0.0201(19) 0.030(2) 0.0036(16) -0.0021(17) 0.0057(16)
 C1_7 0.020(7) 0.023(5) 0.035(6) 0.002(4) -0.006(5) -0.004(5)
 C2_7 0.053(9) 0.026(6) 0.040(6) 0.003(5) -0.006(6) 0.010(5)
 C3_7 0.045(9) 0.030(6) 0.041(6) 0.005(5) -0.010(6) 0.013(6)
 C4_7 0.040(8) 0.031(6) 0.037(7) 0.004(5) -0.012(6) 0.004(6)
 C5_7 0.038(8) 0.031(6) 0.038(7) 0.008(5) 0.003(6) 0.005(6)
 C6_7 0.034(8) 0.028(6) 0.037(6) 0.008(5) 0.002(5) 0.008(5)
 C7_7 0.082(12) 0.037(9) 0.046(7) 0.010(6) 0.005(7) 0.036(8)
 C8_7 0.062(12) 0.028(9) 0.072(13) 0.020(9) -0.008(10) -0.004(9)
 S1_8 0.024(2) 0.025(2) 0.033(2) 0.0044(17) 0.0049(16) 0.0054(16)
 C1_8 0.031(5) 0.023(7) 0.038(6) 0.011(5) 0.006(4) 0.012(4)
 C2_8 0.030(5) 0.039(7) 0.039(6) 0.006(5) 0.009(4) 0.017(5)
 C3_8 0.029(5) 0.032(7) 0.038(6) 0.009(5) 0.009(4) 0.018(5)
 C4_8 0.028(6) 0.028(7) 0.044(6) 0.013(5) 0.002(5) 0.018(5)
 C5_8 0.029(6) 0.043(8) 0.045(7) 0.006(6) 0.001(5) 0.010(5)
 C6_8 0.032(5) 0.033(7) 0.038(6) 0.004(5) 0.003(4) 0.014(5)
 C7_8 0.041(8) 0.073(11) 0.048(8) -0.008(7) 0.008(6) 0.008(7)
 C8_8 0.034(10) 0.059(12) 0.057(11) 0.026(9) 0.009(9) 0.006(8)
 S1_9 0.033(2) 0.030(2) 0.035(2) 0.0069(17) 0.0088(18) 0.0063(17)
 C1_9 0.034(7) 0.027(5) 0.028(6) 0.001(4) -0.021(5) -0.002(5)
 C2_9 0.035(8) 0.042(6) 0.036(6) 0.010(5) -0.016(5) 0.000(5)
 C3_9 0.064(10) 0.041(6) 0.045(8) 0.008(5) -0.019(7) 0.003(6)
 C4_9 0.055(10) 0.042(7) 0.053(8) 0.001(6) -0.027(7) 0.003(6)
 C5_9 0.058(10) 0.037(7) 0.055(8) -0.004(5) -0.023(7) 0.011(6)
 C6_9 0.036(8) 0.039(6) 0.041(7) -0.004(5) -0.021(6) 0.008(6)
 C7_9 0.092(13) 0.051(9) 0.054(9) 0.019(7) 0.020(9) 0.013(9)
 C8_9 0.17(2) 0.042(12) 0.101(18) -0.001(12) -0.066(17) 0.037(14)
 S1_10 0.030(2) 0.027(2) 0.028(2) 0.0014(16) 0.0019(17) 0.0075(16)
 C1_10 0.031(7) 0.032(5) 0.031(6) 0.010(4) -0.005(5) 0.015(4)
 C2_10 0.034(7) 0.038(6) 0.033(6) 0.006(4) -0.001(5) 0.013(5)
 C3_10 0.050(8) 0.036(6) 0.031(7) 0.007(5) 0.000(6) 0.014(5)
 C4_10 0.041(8) 0.040(7) 0.047(7) 0.012(5) -0.005(6) 0.012(5)
 C5_10 0.052(9) 0.039(6) 0.045(7) 0.011(5) -0.001(6) 0.011(6)
 C6_10 0.033(7) 0.039(6) 0.034(7) 0.011(5) -0.001(5) 0.014(5)
 C7_10 0.066(9) 0.040(8) 0.061(10) 0.002(7) 0.029(8) 0.009(7)
 C8_10 0.092(15) 0.029(10) 0.069(13) -0.010(9) -0.024(11) 0.009(10)
 S1_11 0.022(2) 0.029(2) 0.0260(19) 0.0054(16) -0.0006(16) 0.0030(16)
 C1_11 0.024(6) 0.030(5) 0.018(5) 0.004(4) 0.006(5) 0.006(4)
 C2_11 0.047(8) 0.038(6) 0.036(7) -0.006(5) -0.008(6) 0.010(5)
 C3_11 0.045(8) 0.041(6) 0.033(7) 0.000(5) -0.007(6) 0.003(6)
 C4_11 0.031(7) 0.043(6) 0.028(7) 0.013(5) 0.010(5) 0.004(5)
 C5_11 0.040(8) 0.036(6) 0.034(7) 0.011(5) 0.003(6) 0.010(5)
 C6_11 0.039(8) 0.036(6) 0.033(7) 0.002(5) -0.004(6) 0.012(5)
 C7_11 0.060(11) 0.042(7) 0.056(10) -0.014(6) -0.021(9) 0.016(7)
 C8_11 0.043(11) 0.077(14) 0.061(12) 0.033(10) -0.009(9) 0.020(10)
 S1_12 0.038(2) 0.023(2) 0.033(2) 0.0065(17) -0.0046(18) 0.0037(17)
 C1_12 0.032(8) 0.019(5) 0.032(5) 0.008(4) -0.005(5) 0.001(5)
 C2_12 0.030(7) 0.020(5) 0.043(6) 0.013(4) 0.002(5) 0.003(5)
 C3_12 0.040(8) 0.023(6) 0.043(6) 0.012(5) 0.001(5) -0.001(5)
 C4_12 0.035(8) 0.032(6) 0.039(6) 0.009(5) 0.005(6) 0.003(5)
 C5_12 0.045(9) 0.031(6) 0.032(6) 0.012(5) -0.007(6) 0.009(6)
 C6_12 0.035(8) 0.030(6) 0.032(6) 0.014(4) -0.004(5) 0.001(5)
 C7_12 0.052(10) 0.029(8) 0.052(7) 0.009(6) -0.006(7) 0.013(7)
 C8_12 0.054(11) 0.029(9) 0.054(11) -0.008(8) -0.003(9) 0.002(8)
 S1_13 0.036(2) 0.026(2) 0.0223(19) 0.0093(16) -0.0039(17) -0.0016(17)
 C1_13 0.053(6) 0.026(6) 0.024(6) 0.012(5) -0.005(5) 0.002(4)
 C2_13 0.058(6) 0.022(6) 0.031(7) 0.017(5) -0.015(5) -0.007(5)
 C3_13 0.088(8) 0.028(7) 0.039(8) 0.013(6) -0.013(6) 0.003(6)
 C4_13 0.089(8) 0.018(6) 0.041(8) 0.013(6) -0.013(6) 0.001(6)
 C5_13 0.074(8) 0.017(6) 0.036(8) 0.008(5) -0.002(6) 0.008(5)
 C6_13 0.052(6) 0.012(6) 0.037(7) 0.009(5) -0.005(5) -0.001(5)
 C7_13 0.059(7) 0.036(9) 0.041(9) 0.023(7) -0.012(6) -0.008(6)
 C8_13 0.14(2) 0.035(11) 0.062(13) -0.022(10) -0.027(13) 0.012(12)
 S1_14 0.026(2) 0.031(2) 0.028(2) 0.0052(17) -0.0002(16) 0.0066(16)
 C1_14 0.026(5) 0.018(7) 0.034(5) 0.007(5) 0.003(4) -0.001(5)
 C2_14 0.025(5) 0.024(7) 0.040(6) 0.001(5) -0.001(4) 0.003(5)
 C3_14 0.027(6) 0.039(9) 0.043(6) 0.004(6) 0.001(5) 0.001(5)
 C4_14 0.037(6) 0.036(9) 0.043(7) 0.004(6) 0.003(5) 0.004(6)
 C5_14 0.040(6) 0.038(9) 0.034(6) 0.014(6) 0.003(5) 0.006(6)
 C6_14 0.034(6) 0.034(8) 0.037(6) 0.015(6) 0.001(5) 0.003(6)
 C7_14 0.037(8) 0.044(10) 0.047(7) 0.009(7) -0.004(6) 0.013(7)
 C8_14 0.039(11) 0.073(13) 0.053(11) 0.023(10) 0.016(9) 0.003(9)
 S1_15 0.029(2) 0.034(2) 0.027(2) 0.0097(17) 0.0033(17) 0.0047(17)
 C1_15 0.019(6) 0.045(6) 0.017(5) 0.006(4) 0.013(4) 0.005(5)
 C2_15 0.061(9) 0.051(7) 0.032(7) -0.001(5) -0.004(6) 0.018(6)
 C3_15 0.064(9) 0.052(8) 0.031(7) 0.003(6) -0.006(6) 0.011(6)
 C4_15 0.039(8) 0.052(7) 0.034(7) 0.010(5) 0.005(6) 0.001(6)
 C5_15 0.040(8) 0.054(7) 0.035(7) 0.011(5) 0.004(6) 0.007(6)
 C6_15 0.035(7) 0.052(7) 0.034(7) 0.010(5) 0.005(5) 0.012(6)
 C7_15 0.097(13) 0.064(9) 0.048(10) -0.010(8) -0.018(10) 0.040(9)
 C8_15 0.051(12) 0.074(13) 0.039(10) 0.000(9) -0.019(9) -0.015(10)
 S1_16 0.037(2) 0.028(2) 0.031(2) 0.0066(17) -0.0029(18) -0.0021(17)
 C1_16 0.035(5) 0.025(8) 0.035(6) 0.001(5) -0.004(4) -0.002(5)
 C2_16 0.037(6) 0.026(8) 0.036(6) 0.002(5) -0.003(4) -0.003(5)
 C3_16 0.034(6) 0.026(8) 0.040(7) 0.003(6) -0.002(5) -0.003(5)
 C4_16 0.040(7) 0.024(8) 0.042(7) -0.001(6) -0.011(5) 0.001(6)
 C5_16 0.044(6) 0.025(8) 0.043(7) 0.003(6) -0.007(5) 0.004(6)
 C6_16 0.043(6) 0.020(7) 0.036(6) -0.006(5) -0.009(5) -0.001(5)
 C7_16 0.040(9) 0.072(12) 0.049(8) 0.028(8) 0.002(6) 0.006(8)
 C8_16 0.041(11) 0.066(13) 0.072(13) 0.001(10) -0.001(10) 0.023(9)
 S1_17 0.034(2) 0.032(2) 0.030(2) 0.0049(17) 0.0010(18) 0.0026(17)
 C1_17 0.047(6) 0.028(6) 0.021(6) -0.004(5) 0.001(5) 0.005(5)
 C2_17 0.055(6) 0.039(7) 0.034(8) 0.009(6) 0.004(5) 0.009(5)
 C3_17 0.056(7) 0.050(8) 0.035(8) 0.016(7) 0.006(6) 0.007(6)
 C4_17 0.056(7) 0.051(8) 0.031(8) 0.006(7) 0.004(6) 0.004(6)
 C5_17 0.053(7) 0.048(8) 0.040(9) 0.007(7) 0.008(6) 0.007(6)
 C6_17 0.049(6) 0.036(8) 0.044(8) 0.009(7) 0.009(6) 0.010(5)
 C7_17 0.058(7) 0.056(10) 0.035(9) 0.014(8) 0.006(6) 0.014(7)
 C8_17 0.073(14) 0.080(15) 0.057(13) 0.022(11) 0.013(11) -0.008(11)
 S1_18 0.045(3) 0.029(2) 0.037(2) 0.0056(18) 0.0032(19) 0.0107(19)
 C1_18 0.041(7) 0.029(5) 0.030(6) 0.006(4) -0.003(5) 0.017(5)
 C2_18 0.053(8) 0.028(6) 0.039(7) 0.003(5) -0.011(5) 0.017(5)
 C3_18 0.070(9) 0.044(8) 0.049(7) -0.004(6) -0.005(6) 0.025(6)
 C4_18 0.064(10) 0.064(8) 0.044(8) 0.002(6) -0.007(7) 0.027(6)
 C5_18 0.061(10) 0.067(8) 0.051(8) 0.000(6) 0.013(7) 0.018(7)
 C6_18 0.048(8) 0.048(7) 0.043(7) 0.010(5) 0.005(6) 0.016(6)
 C7_18 0.069(9) 0.035(8) 0.060(10) 0.003(7) 0.004(8) 0.017(7)
 C8_18 0.13(2) 0.12(2) 0.072(15) -0.022(14) 0.019(15) 0.075(17)

_geom_special_details
;
 All esds (except the esd in the dihedral angle between two l.s. planes)
 are estimated using the full covariance matrix.  The cell esds are taken
 into account individually in the estimation of esds in distances, angles
 and torsion angles; correlations between esds in cell parameters are only
 used when they are defined by crystal symmetry.  An approximate (isotropic)
 treatment of cell esds is used for estimating esds involving l.s. planes.
;
loop_
  _geom_bond_atom_site_label_1
  _geom_bond_atom_site_label_2
  _geom_bond_distance
  _geom_bond_site_symmetry_2
  _geom_bond_publ_flag
 Ag01 Ag02 2.7486(14) . ?
 Ag01 Ag03 2.7763(14) . ?
 Ag01 Ag04 2.7556(13) . ?
 Ag01 Ag05 2.7542(14) . ?
 Ag01 Ag06 2.7847(14) . ?
 Ag01 Ag07 2.7537(14) . ?
 Ag01 Ag08 2.7766(13) . ?
 Ag01 Ag09 2.7525(13) . ?
 Ag01 Ag0A 2.7558(13) . ?
 Ag01 Ag0B 2.7530(14) . ?
 Ag01 Ag0C 2.7817(14) . ?
 Ag01 Ag0D 2.7786(14) . ?
 Ag02 Ag03 2.8420(14) . ?
 Ag02 Ag04 2.9365(14) . ?
 Ag02 Ag05 2.8329(14) . ?
 Ag02 Ag0A 2.9476(14) . ?
 Ag02 Ag0D 2.9546(14) . ?
 Ag02 Ag0F 2.9071(14) . ?
 Ag02 Ag0I 3.0333(15) . ?
 Ag02 S1_2 2.492(4) . ?
 Ag03 Ag05 2.8530(14) . ?
 Ag03 Ag08 2.9626(14) . ?
 Ag03 Ag09 2.9654(15) . ?
 Ag03 Ag0D 2.9210(14) . ?
 Ag03 Ag0I 3.3379(16) . ?
 Ag03 Ag0O 2.9670(15) . ?
 Ag03 Ag0P 3.0615(15) . ?
 Ag03 S1_5 2.481(3) . ?
 Ag04 Ag05 2.9339(14) . ?
 Ag04 Ag06 2.8374(14) . ?
 Ag04 Ag0A 2.8411(14) . ?
 Ag04 Ag0C 2.9800(14) . ?
 Ag04 Ag0F 3.3090(15) . ?
 Ag04 Ag0J 2.9131(15) . ?
 Ag04 Ag0N 3.1122(15) . ?
 Ag04 S1_7 2.484(4) . ?
 Ag05 Ag09 2.9624(14) . ?
 Ag05 Ag0C 2.9517(15) . ?
 Ag05 Ag0E 2.8668(15) . ?
 Ag05 Ag0J 3.0929(14) . ?
 Ag05 S1_11 2.510(4) . ?
 Ag06 Ag07 2.9377(14) . ?
 Ag06 Ag0A 2.8483(15) . ?
 Ag06 Ag0B 2.9902(14) . ?
 Ag06 Ag0C 2.9687(14) . ?
 Ag06 Ag0H 3.0872(15) . ?
 Ag06 Ag0M 2.9488(15) . ?
 Ag06 Ag0N 3.2573(16) . ?
 Ag06 S1_3 2.492(4) . ?
 Ag07 Ag08 2.9500(15) . ?
 Ag07 Ag09 2.8255(14) . ?
 Ag07 Ag0B 2.9438(15) . ?
 Ag07 Ag0C 2.8260(14) . ?
 Ag07 Ag0G 3.3471(14) . ?
 Ag07 Ag0K 2.8580(15) . ?
 Ag07 Ag0M 3.1063(15) . ?
 Ag07 S1_14 2.489(4) . ?
 Ag08 Ag09 2.9185(15) . ?
 Ag08 Ag0B 2.8411(14) . ?
 Ag08 Ag0D 2.8423(14) . ?
 Ag08 Ag0G 2.9602(15) . ?
 Ag08 Ag0O 3.2179(16) . ?
 Ag08 S1_12 2.474(4) . ?
 Ag09 Ag0C 2.8209(14) . ?
 Ag09 Ag0E 3.3640(15) . ?
 Ag09 Ag0G 3.3271(15) . ?
 Ag09 Ag0P 2.8894(15) . ?
 Ag09 S1_4 2.462(3) . ?
 Ag0A Ag0B 2.9252(14) . ?
 Ag0A Ag0D 2.9975(14) . ?
 Ag0A Ag0F 3.2382(15) . ?
 Ag0A Ag0H 3.2663(15) . ?
 Ag0A Ag0L 2.8915(15) . ?
 Ag0A S1_6 2.460(4) . ?
 Ag0B Ag0D 2.8424(15) . ?
 Ag0B Ag0H 2.9510(14) . ?
 Ag0B Ag0K 3.2338(15) . ?
 Ag0B Ag0L 3.1886(15) . ?
 Ag0B S1_13 2.453(4) . ?
 Ag0C Ag0E 3.1564(15) . ?
 Ag0C Ag0M 3.3493(15) . ?
 Ag0C Ag0N 2.8870(15) . ?
 Ag0C S1_8 2.475(4) . ?
 Ag0D Ag0I 2.9395(15) . ?
 Ag0D Ag0L 3.0209(15) . ?
 Ag0D Ag0O 3.2180(15) . ?
 Ag0D S1_10 2.481(4) . ?
 Ag0E S1_8 2.445(4) . ?
 Ag0E S1_11 2.803(4) . ?
 Ag0E S1_15 2.411(4) . ?
 Ag0F S1_6 2.435(4) . ?
 Ag0F S1_9 2.414(4) . ?
 Ag0G Ag0K 3.2682(15) . ?
 Ag0G S1_4 2.412(4) . ?
 Ag0G S1_16 2.395(4) . ?
 Ag0H S1_3 2.423(4) . ?
 Ag0H S1_17 2.404(4) . ?
 Ag0I S1_2 2.408(4) . ?
 Ag0I S1_18 2.390(4) . ?
 Ag0J S1_7 2.946(4) . ?
 Ag0J S1_9 2.396(4) . ?
 Ag0J S1_11 2.420(4) . ?
 Ag0K S1_13 2.419(4) . ?
 Ag0K S1_14 2.898(4) . ?
 Ag0K S1_16 2.408(4) . ?
 Ag0L S1_10 2.400(4) . ?
 Ag0L S1_17 2.382(4) . ?
 Ag0M S1_1 2.408(4) . ?
 Ag0M S1_14 2.417(4) . ?
 Ag0N S1_1 2.391(4) . ?
 Ag0N S1_7 2.410(4) . ?
 Ag0O S1_12 2.418(4) . ?
 Ag0O S1_18 2.410(4) . ?
 Ag0P S1_5 2.417(4) . ?
 Ag0P S1_15 2.399(4) . ?
 P018 C03L 1.806(16) . ?
 P018 C03R 1.770(18) . ?
 P018 C04J 1.825(19) . ?
 P018 C04V 1.768(16) . ?
 Cl01 C04H 1.762(17) . ?
 Cl0A C04H 1.735(18) . ?
 C02X H02X 0.9500 . ?
 C02X C04X 1.33(2) . ?
 C02X C052 1.35(2) . ?
 C03G H03G 0.9500 . ?
 C03G C03L 1.41(2) . ?
 C03G C05C 1.38(2) . ?
 C03L C04B 1.38(2) . ?
 C03R C03T 1.38(2) . ?
 C03R C063 1.38(2) . ?
 C03T H03T 0.9500 . ?
 C03T C05A 1.35(2) . ?
 C04B H04B 0.9500 . ?
 C04B C05T 1.36(2) . ?
 C04H H04A 0.9900 . ?
 C04H H04C 0.9900 . ?
 C04J C05J 1.38(3) . ?
 C04J C05O 1.39(2) . ?
 C04V C05E 1.37(2) . ?
 C04V C05Q 1.38(2) . ?
 C04X H04X 0.9500 . ?
 C04X C05E 1.40(2) . ?
 C052 H052 0.9500 . ?
 C052 C05Q 1.40(2) . ?
 C05A H05A 0.9500 . ?
 C05A C05X 1.39(2) . ?
 C05C H05C 0.9500 . ?
 C05C C05N 1.43(2) . ?
 C05E H05E 0.9500 . ?
 C05I H05B 0.9900 . ?
 C05I H05D 0.9900 . ?
 C05I C060 1.53(3) . ?
 C05I C0AA 1.42(3) . ?
 C05J H05J 0.9500 . ?
 C05J C05U 1.40(2) . ?
 C05K H05K 0.9500 . ?
 C05K C05O 1.48(3) . ?
 C05K C 1.35(3) . ?
 C05N H05N 0.9500 . ?
 C05N C05T 1.36(2) . ?
 C05O H05O 0.9500 . ?
 C05Q H05Q 0.9500 . ?
 C05R H05F 0.9800 . ?
 C05R H05G 0.9800 . ?
 C05R H05H 0.9800 . ?
 C05R C065 1.47(2) . ?
 C05T H05T 0.9500 . ?
 C05U H05U 0.9500 . ?
 C05U C 1.36(3) . ?
 C05X H05X 0.9500 . ?
 C05X C061 1.39(3) . ?
 C060 H06A 0.9900 . ?
 C060 H06B 0.9900 . ?
 C060 C065 1.44(3) . ?
 C061 H061 0.9500 . ?
 C061 C063 1.38(3) . ?
 C062 H06C 0.9800 . ?
 C062 H06D 0.9800 . ?
 C062 H06E 0.9800 . ?
 C062 C0AA 1.43(3) . ?
 C063 H063 0.9500 . ?
 C065 H06F 0.9900 . ?
 C065 H06G 0.9900 . ?
 C H 0.9500 . ?
 C0AA H0AA 0.9900 . ?
 C0AA H0AB 0.9900 . ?
 S1_1 C1_1 1.772(14) . ?
 C1_1 C2_1 1.418(18) . ?
 C1_1 C6_1 1.375(18) . ?
 C2_1 C3_1 1.40(2) . ?
 C2_1 C7_1 1.52(2) . ?
 C3_1 H3_1 0.9500 . ?
 C3_1 C4_1 1.35(2) . ?
 C4_1 C5_1 1.35(2) . ?
 C4_1 C8_1 1.54(2) . ?
 C5_1 H5_1 0.9500 . ?
 C5_1 C6_1 1.37(2) . ?
 C6_1 H6_1 0.9500 . ?
 C7_1 H7A_1 0.9800 . ?
 C7_1 H7B_1 0.9800 . ?
 C7_1 H7C_1 0.9800 . ?
 C8_1 H8A_1 0.9800 . ?
 C8_1 H8B_1 0.9800 . ?
 C8_1 H8C_1 0.9800 . ?
 S1_2 C1_2 1.788(14) . ?
 C1_2 C2_2 1.413(18) . ?
 C1_2 C6_2 1.362(18) . ?
 C2_2 C3_2 1.368(19) . ?
 C2_2 C7_2 1.507(19) . ?
 C3_2 H3_2 0.9500 . ?
 C3_2 C4_2 1.376(19) . ?
 C4_2 C5_2 1.379(19) . ?
 C4_2 C8_2 1.52(2) . ?
 C5_2 H5_2 0.9500 . ?
 C5_2 C6_2 1.380(18) . ?
 C6_2 H6_2 0.9500 . ?
 C7_2 H7A_2 0.9800 . ?
 C7_2 H7B_2 0.9800 . ?
 C7_2 H7C_2 0.9800 . ?
 C8_2 H8A_2 0.9800 . ?
 C8_2 H8B_2 0.9800 . ?
 C8_2 H8C_2 0.9800 . ?
 S1_3 C1_3 1.768(13) . ?
 C1_3 C2_3 1.404(18) . ?
 C1_3 C6_3 1.394(18) . ?
 C2_3 C3_3 1.396(17) . ?
 C2_3 C7_3 1.498(18) . ?
 C3_3 H3_3 0.9500 . ?
 C3_3 C4_3 1.375(19) . ?
 C4_3 C5_3 1.370(19) . ?
 C4_3 C8_3 1.510(18) . ?
 C5_3 H5_3 0.9500 . ?
 C5_3 C6_3 1.386(18) . ?
 C6_3 H6_3 0.9500 . ?
 C7_3 H7A_3 0.9800 . ?
 C7_3 H7B_3 0.9800 . ?
 C7_3 H7C_3 0.9800 . ?
 C8_3 H8A_3 0.9800 . ?
 C8_3 H8B_3 0.9800 . ?
 C8_3 H8C_3 0.9800 . ?
 S1_4 C1_4 1.771(14) . ?
 C1_4 C2_4 1.391(17) . ?
 C1_4 C6_4 1.408(18) . ?
 C2_4 C3_4 1.387(18) . ?
 C2_4 C7_4 1.477(18) . ?
 C3_4 H3_4 0.9500 . ?
 C3_4 C4_4 1.357(19) . ?
 C4_4 C5_4 1.369(19) . ?
 C4_4 C8_4 1.50(2) . ?
 C5_4 H5_4 0.9500 . ?
 C5_4 C6_4 1.392(19) . ?
 C6_4 H6_4 0.9500 . ?
 C7_4 H7A_4 0.9800 . ?
 C7_4 H7B_4 0.9800 . ?
 C7_4 H7C_4 0.9800 . ?
 C8_4 H8A_4 0.9800 . ?
 C8_4 H8B_4 0.9800 . ?
 C8_4 H8C_4 0.9800 . ?
 S1_5 C1_5 1.790(14) . ?
 C1_5 C2_5 1.400(17) . ?
 C1_5 C6_5 1.366(17) . ?
 C2_5 C3_5 1.396(18) . ?
 C2_5 C7_5 1.465(18) . ?
 C3_5 H3_5 0.9500 . ?
 C3_5 C4_5 1.382(18) . ?
 C4_5 C5_5 1.392(18) . ?
 C4_5 C8_5 1.504(19) . ?
 C5_5 H5_5 0.9500 . ?
 C5_5 C6_5 1.356(18) . ?
 C6_5 H6_5 0.9500 . ?
 C7_5 H7A_5 0.9800 . ?
 C7_5 H7B_5 0.9800 . ?
 C7_5 H7C_5 0.9800 . ?
 C8_5 H8A_5 0.9800 . ?
 C8_5 H8B_5 0.9800 . ?
 C8_5 H8C_5 0.9800 . ?
 S1_6 C1_6 1.785(14) . ?
 C1_6 C2_6 1.396(18) . ?
 C1_6 C6_6 1.392(19) . ?
 C2_6 C3_6 1.418(19) . ?
 C2_6 C7_6 1.488(19) . ?
 C3_6 H3_6 0.9500 . ?
 C3_6 C4_6 1.40(2) . ?
 C4_6 C5_6 1.360(18) . ?
 C4_6 C8_6 1.48(2) . ?
 C5_6 H5_6 0.9500 . ?
 C5_6 C6_6 1.381(18) . ?
 C6_6 H6_6 0.9500 . ?
 C7_6 H7A_6 0.9800 . ?
 C7_6 H7B_6 0.9800 . ?
 C7_6 H7C_6 0.9800 . ?
 C8_6 H8A_6 0.9800 . ?
 C8_6 H8B_6 0.9800 . ?
 C8_6 H8C_6 0.9800 . ?
 S1_7 C1_7 1.790(14) . ?
 C1_7 C2_7 1.420(19) . ?
 C1_7 C6_7 1.357(19) . ?
 C2_7 C3_7 1.389(19) . ?
 C2_7 C7_7 1.49(2) . ?
 C3_7 H3_7 0.9500 . ?
 C3_7 C4_7 1.39(2) . ?
 C4_7 C5_7 1.403(19) . ?
 C4_7 C8_7 1.50(2) . ?
 C5_7 H5_7 0.9500 . ?
 C5_7 C6_7 1.368(18) . ?
 C6_7 H6_7 0.9500 . ?
 C7_7 H7A_7 0.9800 . ?
 C7_7 H7B_7 0.9800 . ?
 C7_7 H7C_7 0.9800 . ?
 C8_7 H8A_7 0.9800 . ?
 C8_7 H8B_7 0.9800 . ?
 C8_7 H8C_7 0.9800 . ?
 S1_8 C1_8 1.779(14) . ?
 C1_8 C2_8 1.379(19) . ?
 C1_8 C6_8 1.390(19) . ?
 C2_8 C3_8 1.395(18) . ?
 C2_8 C7_8 1.47(2) . ?
 C3_8 H3_8 0.9500 . ?
 C3_8 C4_8 1.398(19) . ?
 C4_8 C5_8 1.370(19) . ?
 C4_8 C8_8 1.499(19) . ?
 C5_8 H5_8 0.9500 . ?
 C5_8 C6_8 1.387(19) . ?
 C6_8 H6_8 0.9500 . ?
 C7_8 H7A_8 0.9800 . ?
 C7_8 H7B_8 0.9800 . ?
 C7_8 H7C_8 0.9800 . ?
 C8_8 H8A_8 0.9800 . ?
 C8_8 H8B_8 0.9800 . ?
 C8_8 H8C_8 0.9800 . ?
 S1_9 C1_9 1.791(14) . ?
 C1_9 C2_9 1.385(19) . ?
 C1_9 C6_9 1.40(2) . ?
 C2_9 C3_9 1.39(2) . ?
 C2_9 C7_9 1.50(2) . ?
 C3_9 H3_9 0.9500 . ?
 C3_9 C4_9 1.39(2) . ?
 C4_9 C5_9 1.35(2) . ?
 C4_9 C8_9 1.54(2) . ?
 C5_9 H5_9 0.9500 . ?
 C5_9 C6_9 1.36(2) . ?
 C6_9 H6_9 0.9500 . ?
 C7_9 H7A_9 0.9800 . ?
 C7_9 H7B_9 0.9800 . ?
 C7_9 H7C_9 0.9800 . ?
 C8_9 H8A_9 0.9800 . ?
 C8_9 H8B_9 0.9800 . ?
 C8_9 H8C_9 0.9800 . ?
 S1_10 C1_10 1.782(14) . ?
 C1_10 C2_10 1.389(19) . ?
 C1_10 C6_10 1.377(18) . ?
 C2_10 C3_10 1.395(19) . ?
 C2_10 C7_10 1.479(19) . ?
 C3_10 H3_10 0.9500 . ?
 C3_10 C4_10 1.37(2) . ?
 C4_10 C5_10 1.37(2) . ?
 C4_10 C8_10 1.51(2) . ?
 C5_10 H5_10 0.9500 . ?
 C5_10 C6_10 1.39(2) . ?
 C6_10 H6_10 0.9500 . ?
 C7_10 H7A_10 0.9800 . ?
 C7_10 H7B_10 0.9800 . ?
 C7_10 H7C_10 0.9800 . ?
 C8_10 H8A_10 0.9800 . ?
 C8_10 H8B_10 0.9800 . ?
 C8_10 H8C_10 0.9800 . ?
 S1_11 C1_11 1.787(14) . ?
 C1_11 C2_11 1.378(18) . ?
 C1_11 C6_11 1.382(18) . ?
 C2_11 C3_11 1.37(2) . ?
 C2_11 C7_11 1.52(2) . ?
 C3_11 H3_11 0.9500 . ?
 C3_11 C4_11 1.38(2) . ?
 C4_11 C5_11 1.397(19) . ?
 C4_11 C8_11 1.520(19) . ?
 C5_11 H5_11 0.9500 . ?
 C5_11 C6_11 1.349(19) . ?
 C6_11 H6_11 0.9500 . ?
 C7_11 H7A_11 0.9800 . ?
 C7_11 H7B_11 0.9800 . ?
 C7_11 H7C_11 0.9800 . ?
 C8_11 H8A_11 0.9800 . ?
 C8_11 H8B_11 0.9800 . ?
 C8_11 H8C_11 0.9800 . ?
 S1_12 C1_12 1.791(14) . ?
 C1_12 C2_12 1.377(18) . ?
 C1_12 C6_12 1.389(18) . ?
 C2_12 C3_12 1.399(19) . ?
 C2_12 C7_12 1.496(18) . ?
 C3_12 H3_12 0.9500 . ?
 C3_12 C4_12 1.384(19) . ?
 C4_12 C5_12 1.416(19) . ?
 C4_12 C8_12 1.509(19) . ?
 C5_12 H5_12 0.9500 . ?
 C5_12 C6_12 1.365(19) . ?
 C6_12 H6_12 0.9500 . ?
 C7_12 H7A_12 0.9800 . ?
 C7_12 H7B_12 0.9800 . ?
 C7_12 H7C_12 0.9800 . ?
 C8_12 H8A_12 0.9800 . ?
 C8_12 H8B_12 0.9800 . ?
 C8_12 H8C_12 0.9800 . ?
 S1_13 C1_13 1.800(15) . ?
 C1_13 C2_13 1.416(19) . ?
 C1_13 C6_13 1.38(2) . ?
 C2_13 C3_13 1.38(2) . ?
 C2_13 C7_13 1.51(2) . ?
 C3_13 H3_13 0.9500 . ?
 C3_13 C4_13 1.36(2) . ?
 C4_13 C5_13 1.37(2) . ?
 C4_13 C8_13 1.51(2) . ?
 C5_13 H5_13 0.9500 . ?
 C5_13 C6_13 1.369(19) . ?
 C6_13 H6_13 0.9500 . ?
 C7_13 H7A_13 0.9800 . ?
 C7_13 H7B_13 0.9800 . ?
 C7_13 H7C_13 0.9800 . ?
 C8_13 H8A_13 0.9800 . ?
 C8_13 H8B_13 0.9800 . ?
 C8_13 H8C_13 0.9800 . ?
 S1_14 C1_14 1.772(13) . ?
 C1_14 C2_14 1.387(18) . ?
 C1_14 C6_14 1.416(18) . ?
 C2_14 C3_14 1.387(18) . ?
 C2_14 C7_14 1.514(19) . ?
 C3_14 H3_14 0.9500 . ?
 C3_14 C4_14 1.39(2) . ?
 C4_14 C5_14 1.40(2) . ?
 C4_14 C8_14 1.501(19) . ?
 C5_14 H5_14 0.9500 . ?
 C5_14 C6_14 1.373(18) . ?
 C6_14 H6_14 0.9500 . ?
 C7_14 H7A_14 0.9800 . ?
 C7_14 H7B_14 0.9800 . ?
 C7_14 H7C_14 0.9800 . ?
 C8_14 H8A_14 0.9800 . ?
 C8_14 H8B_14 0.9800 . ?
 C8_14 H8C_14 0.9800 . ?
 S1_15 C1_15 1.797(14) . ?
 C1_15 C2_15 1.39(2) . ?
 C1_15 C6_15 1.390(19) . ?
 C2_15 C3_15 1.40(2) . ?
 C2_15 C7_15 1.48(2) . ?
 C3_15 H3_15 0.9500 . ?
 C3_15 C4_15 1.36(2) . ?
 C4_15 C5_15 1.34(2) . ?
 C4_15 C8_15 1.52(2) . ?
 C5_15 H5_15 0.9500 . ?
 C5_15 C6_15 1.37(2) . ?
 C6_15 H6_15 0.9500 . ?
 C7_15 H7A_15 0.9800 . ?
 C7_15 H7B_15 0.9800 . ?
 C7_15 H7C_15 0.9800 . ?
 C8_15 H8A_15 0.9800 . ?
 C8_15 H8B_15 0.9800 . ?
 C8_15 H8C_15 0.9800 . ?
 S1_16 C1_16 1.800(15) . ?
 C1_16 C2_16 1.387(19) . ?
 C1_16 C6_16 1.385(19) . ?
 C2_16 C3_16 1.411(19) . ?
 C2_16 C7_16 1.51(2) . ?
 C3_16 H3_16 0.9500 . ?
 C3_16 C4_16 1.372(19) . ?
 C4_16 C5_16 1.362(19) . ?
 C4_16 C8_16 1.50(2) . ?
 C5_16 H5_16 0.9500 . ?
 C5_16 C6_16 1.378(19) . ?
 C6_16 H6_16 0.9500 . ?
 C7_16 H7A_16 0.9800 . ?
 C7_16 H7B_16 0.9800 . ?
 C7_16 H7C_16 0.9800 . ?
 C8_16 H8A_16 0.9800 . ?
 C8_16 H8B_16 0.9800 . ?
 C8_16 H8C_16 0.9800 . ?
 S1_17 C1_17 1.773(14) . ?
 C1_17 C2_17 1.38(2) . ?
 C1_17 C6_17 1.44(2) . ?
 C2_17 C3_17 1.40(2) . ?
 C2_17 C7_17 1.46(2) . ?
 C3_17 H3_17 0.9500 . ?
 C3_17 C4_17 1.37(2) . ?
 C4_17 C5_17 1.40(2) . ?
 C4_17 C8_17 1.53(2) . ?
 C5_17 H5_17 0.9500 . ?
 C5_17 C6_17 1.32(2) . ?
 C6_17 H6_17 0.9500 . ?
 C7_17 H7A_17 0.9800 . ?
 C7_17 H7B_17 0.9800 . ?
 C7_17 H7C_17 0.9800 . ?
 C8_17 H8A_17 0.9800 . ?
 C8_17 H8B_17 0.9800 . ?
 C8_17 H8C_17 0.9800 . ?
 S1_18 C1_18 1.768(15) . ?
 C1_18 C2_18 1.414(19) . ?
 C1_18 C6_18 1.404(19) . ?
 C2_18 C3_18 1.39(2) . ?
 C2_18 C7_18 1.48(2) . ?
 C3_18 H3_18 0.9500 . ?
 C3_18 C4_18 1.38(2) . ?
 C4_18 C5_18 1.36(2) . ?
 C4_18 C8_18 1.54(2) . ?
 C5_18 H5_18 0.9500 . ?
 C5_18 C6_18 1.38(2) . ?
 C6_18 H6_18 0.9500 . ?
 C7_18 H7A_18 0.9800 . ?
 C7_18 H7B_18 0.9800 . ?
 C7_18 H7C_18 0.9800 . ?
 C8_18 H8A_18 0.9800 . ?
 C8_18 H8B_18 0.9800 . ?
 C8_18 H8C_18 0.9800 . ?

loop_
  _geom_angle_atom_site_label_1
  _geom_angle_atom_site_label_2
  _geom_angle_atom_site_label_3
  _geom_angle
  _geom_angle_site_symmetry_1
  _geom_angle_site_symmetry_3
  _geom_angle_publ_flag
 Ag02 Ag01 Ag03 61.91(4) . . ?
 Ag02 Ag01 Ag04 64.49(4) . . ?
 Ag02 Ag01 Ag05 61.97(4) . . ?
 Ag02 Ag01 Ag06 116.44(4) . . ?
 Ag02 Ag01 Ag07 178.66(5) . . ?
 Ag02 Ag01 Ag08 115.86(5) . . ?
 Ag02 Ag01 Ag09 117.11(5) . . ?
 Ag02 Ag01 Ag0A 64.76(4) . . ?
 Ag02 Ag01 Ag0B 116.70(5) . . ?
 Ag02 Ag01 Ag0C 117.56(5) . . ?
 Ag02 Ag01 Ag0D 64.62(4) . . ?
 Ag03 Ag01 Ag06 178.15(5) . . ?
 Ag03 Ag01 Ag08 64.49(4) . . ?
 Ag03 Ag01 Ag0C 115.29(4) . . ?
 Ag03 Ag01 Ag0D 63.45(4) . . ?
 Ag04 Ag01 Ag03 116.56(5) . . ?
 Ag04 Ag01 Ag06 61.61(4) . . ?
 Ag04 Ag01 Ag08 178.62(5) . . ?
 Ag04 Ag01 Ag0A 62.06(4) . . ?
 Ag04 Ag01 Ag0C 65.11(4) . . ?
 Ag04 Ag01 Ag0D 117.92(4) . . ?
 Ag05 Ag01 Ag03 62.11(4) . . ?
 Ag05 Ag01 Ag04 64.35(4) . . ?
 Ag05 Ag01 Ag06 116.56(5) . . ?
 Ag05 Ag01 Ag08 117.02(4) . . ?
 Ag05 Ag01 Ag0A 115.80(4) . . ?
 Ag05 Ag01 Ag0C 64.44(4) . . ?
 Ag05 Ag01 Ag0D 116.15(5) . . ?
 Ag07 Ag01 Ag03 117.56(4) . . ?
 Ag07 Ag01 Ag04 115.22(5) . . ?
 Ag07 Ag01 Ag05 116.69(5) . . ?
 Ag07 Ag01 Ag06 64.06(4) . . ?
 Ag07 Ag01 Ag08 64.47(4) . . ?
 Ag07 Ag01 Ag0A 116.37(4) . . ?
 Ag07 Ag01 Ag0C 61.39(4) . . ?
 Ag07 Ag01 Ag0D 116.39(5) . . ?
 Ag08 Ag01 Ag06 117.34(5) . . ?
 Ag08 Ag01 Ag0C 115.43(4) . . ?
 Ag08 Ag01 Ag0D 61.55(4) . . ?
 Ag09 Ag01 Ag03 64.87(4) . . ?
 Ag09 Ag01 Ag04 117.43(5) . . ?
 Ag09 Ag01 Ag05 65.09(4) . . ?
 Ag09 Ag01 Ag06 115.99(5) . . ?
 Ag09 Ag01 Ag07 61.75(4) . . ?
 Ag09 Ag01 Ag08 63.72(4) . . ?
 Ag09 Ag01 Ag0A 177.84(5) . . ?
 Ag09 Ag01 Ag0B 115.04(4) . . ?
 Ag09 Ag01 Ag0C 61.29(4) . . ?
 Ag09 Ag01 Ag0D 116.00(4) . . ?
 Ag0A Ag01 Ag03 117.28(5) . . ?
 Ag0A Ag01 Ag06 61.87(4) . . ?
 Ag0A Ag01 Ag08 116.76(5) . . ?
 Ag0A Ag01 Ag0C 117.09(4) . . ?
 Ag0A Ag01 Ag0D 65.59(4) . . ?
 Ag0B Ag01 Ag03 115.95(5) . . ?
 Ag0B Ag01 Ag04 116.79(4) . . ?
 Ag0B Ag01 Ag05 177.93(5) . . ?
 Ag0B Ag01 Ag06 65.36(4) . . ?
 Ag0B Ag01 Ag07 64.63(4) . . ?
 Ag0B Ag01 Ag08 61.83(4) . . ?
 Ag0B Ag01 Ag0A 64.15(4) . . ?
 Ag0B Ag01 Ag0C 117.54(5) . . ?
 Ag0B Ag01 Ag0D 61.84(4) . . ?
 Ag0C Ag01 Ag06 64.46(4) . . ?
 Ag0D Ag01 Ag06 116.89(4) . . ?
 Ag0D Ag01 Ag0C 176.95(5) . . ?
 Ag01 Ag02 Ag03 59.52(3) . . ?
 Ag01 Ag02 Ag04 57.87(3) . . ?
 Ag01 Ag02 Ag05 59.11(3) . . ?
 Ag01 Ag02 Ag0A 57.74(3) . . ?
 Ag01 Ag02 Ag0D 58.18(3) . . ?
 Ag01 Ag02 Ag0F 117.25(5) . . ?
 Ag01 Ag02 Ag0I 111.86(4) . . ?
 Ag03 Ag02 Ag04 109.04(4) . . ?
 Ag03 Ag02 Ag0A 109.35(4) . . ?
 Ag03 Ag02 Ag0D 60.48(3) . . ?
 Ag03 Ag02 Ag0F 176.48(5) . . ?
 Ag03 Ag02 Ag0I 69.15(4) . . ?
 Ag04 Ag02 Ag0A 57.74(3) . . ?
 Ag04 Ag02 Ag0D 107.20(4) . . ?
 Ag04 Ag02 Ag0I 165.33(5) . . ?
 Ag05 Ag02 Ag03 60.36(4) . . ?
 Ag05 Ag02 Ag04 61.10(3) . . ?
 Ag05 Ag02 Ag0A 107.68(4) . . ?
 Ag05 Ag02 Ag0D 108.45(4) . . ?
 Ag05 Ag02 Ag0F 119.79(5) . . ?
 Ag05 Ag02 Ag0I 124.93(4) . . ?
 Ag0A Ag02 Ag0D 61.04(3) . . ?
 Ag0A Ag02 Ag0I 108.45(4) . . ?
 Ag0D Ag02 Ag0I 58.78(4) . . ?
 Ag0F Ag02 Ag04 68.98(4) . . ?
 Ag0F Ag02 Ag0A 67.15(4) . . ?
 Ag0F Ag02 Ag0D 116.97(4) . . ?
 Ag0F Ag02 Ag0I 111.98(4) . . ?
 S1_2 Ag02 Ag01 156.42(10) . . ?
 S1_2 Ag02 Ag03 115.60(9) . . ?
 S1_2 Ag02 Ag04 135.11(9) . . ?
 S1_2 Ag02 Ag05 141.66(9) . . ?
 S1_2 Ag02 Ag0A 109.02(9) . . ?
 S1_2 Ag02 Ag0D 98.70(9) . . ?
 S1_2 Ag02 Ag0F 66.69(9) . . ?
 S1_2 Ag02 Ag0I 50.51(9) . . ?
 Ag01 Ag03 Ag02 58.56(3) . . ?
 Ag01 Ag03 Ag05 58.56(3) . . ?
 Ag01 Ag03 Ag08 57.76(3) . . ?
 Ag01 Ag03 Ag09 57.18(3) . . ?
 Ag01 Ag03 Ag0D 58.31(3) . . ?
 Ag01 Ag03 Ag0I 102.83(4) . . ?
 Ag01 Ag03 Ag0O 115.10(4) . . ?
 Ag01 Ag03 Ag0P 110.64(5) . . ?
 Ag02 Ag03 Ag05 59.66(3) . . ?
 Ag02 Ag03 Ag08 107.51(4) . . ?
 Ag02 Ag03 Ag09 107.81(4) . . ?
 Ag02 Ag03 Ag0D 61.67(3) . . ?
 Ag02 Ag03 Ag0I 58.13(3) . . ?
 Ag02 Ag03 Ag0O 118.78(5) . . ?
 Ag02 Ag03 Ag0P 128.82(5) . . ?
 Ag05 Ag03 Ag08 108.37(4) . . ?
 Ag05 Ag03 Ag09 61.18(3) . . ?
 Ag05 Ag03 Ag0D 108.83(4) . . ?
 Ag05 Ag03 Ag0I 114.13(4) . . ?
 Ag05 Ag03 Ag0O 173.61(5) . . ?
 Ag05 Ag03 Ag0P 72.33(4) . . ?
 Ag08 Ag03 Ag09 58.99(3) . . ?
 Ag08 Ag03 Ag0I 108.60(4) . . ?
 Ag08 Ag03 Ag0O 65.73(4) . . ?
 Ag08 Ag03 Ag0P 103.21(4) . . ?
 Ag09 Ag03 Ag0I 159.59(4) . . ?
 Ag09 Ag03 Ag0O 115.39(4) . . ?
 Ag09 Ag03 Ag0P 57.27(3) . . ?
 Ag0D Ag03 Ag08 57.77(3) . . ?
 Ag0D Ag03 Ag09 105.66(4) . . ?
 Ag0D Ag03 Ag0I 55.54(3) . . ?
 Ag0D Ag03 Ag0O 66.25(4) . . ?
 Ag0D Ag03 Ag0P 160.73(5) . . ?
 Ag0O Ag03 Ag0I 67.01(4) . . ?
 Ag0O Ag03 Ag0P 110.85(4) . . ?
 Ag0P Ag03 Ag0I 142.59(5) . . ?
 S1_5 Ag03 Ag01 156.41(10) . . ?
 S1_5 Ag03 Ag02 142.31(9) . . ?
 S1_5 Ag03 Ag05 116.73(10) . . ?
 S1_5 Ag03 Ag08 108.65(9) . . ?
 S1_5 Ag03 Ag09 99.62(9) . . ?
 S1_5 Ag03 Ag0D 134.25(10) . . ?
 S1_5 Ag03 Ag0I 99.89(9) . . ?
 S1_5 Ag03 Ag0O 68.58(9) . . ?
 S1_5 Ag03 Ag0P 50.39(9) . . ?
 Ag01 Ag04 Ag02 57.64(3) . . ?
 Ag01 Ag04 Ag05 57.80(3) . . ?
 Ag01 Ag04 Ag06 59.70(3) . . ?
 Ag01 Ag04 Ag0A 58.97(3) . . ?
 Ag01 Ag04 Ag0C 57.87(3) . . ?
 Ag01 Ag04 Ag0F 105.20(4) . . ?
 Ag01 Ag04 Ag0J 117.50(5) . . ?
 Ag01 Ag04 Ag0N 108.36(4) . . ?
 Ag02 Ag04 Ag0C 106.13(4) . . ?
 Ag02 Ag04 Ag0F 55.09(3) . . ?
 Ag02 Ag04 Ag0N 162.53(5) . . ?
 Ag05 Ag04 Ag02 57.71(3) . . ?
 Ag05 Ag04 Ag0C 59.88(3) . . ?
 Ag05 Ag04 Ag0F 105.23(4) . . ?
 Ag05 Ag04 Ag0N 106.87(4) . . ?
 Ag06 Ag04 Ag02 109.10(4) . . ?
 Ag06 Ag04 Ag05 109.43(4) . . ?
 Ag06 Ag04 Ag0A 60.21(4) . . ?
 Ag06 Ag04 Ag0C 61.31(3) . . ?
 Ag06 Ag04 Ag0F 119.76(4) . . ?
 Ag06 Ag04 Ag0J 170.21(5) . . ?
 Ag06 Ag04 Ag0N 66.20(4) . . ?
 Ag0A Ag04 Ag02 61.32(4) . . ?
 Ag0A Ag04 Ag05 107.84(4) . . ?
 Ag0A Ag04 Ag0C 108.46(4) . . ?
 Ag0A Ag04 Ag0F 63.00(3) . . ?
 Ag0A Ag04 Ag0J 127.67(5) . . ?
 Ag0A Ag04 Ag0N 122.96(5) . . ?
 Ag0C Ag04 Ag0F 161.15(4) . . ?
 Ag0C Ag04 Ag0N 56.52(3) . . ?
 Ag0J Ag04 Ag02 74.00(4) . . ?
 Ag0J Ag04 Ag05 63.87(4) . . ?
 Ag0J Ag04 Ag0C 108.99(4) . . ?
 Ag0J Ag04 Ag0F 69.80(4) . . ?
 Ag0J Ag04 Ag0N 107.96(4) . . ?
 Ag0N Ag04 Ag0F 142.30(4) . . ?
 S1_7 Ag04 Ag01 152.08(10) . . ?
 S1_7 Ag04 Ag02 138.85(10) . . ?
 S1_7 Ag04 Ag05 107.84(9) . . ?
 S1_7 Ag04 Ag06 112.05(9) . . ?
 S1_7 Ag04 Ag0A 143.84(9) . . ?
 S1_7 Ag04 Ag0C 94.38(9) . . ?
 S1_7 Ag04 Ag0F 101.71(9) . . ?
 S1_7 Ag04 Ag0J 65.60(9) . . ?
 S1_7 Ag04 Ag0N 49.48(9) . . ?
 Ag01 Ag05 Ag02 58.92(3) . . ?
 Ag01 Ag05 Ag03 59.33(3) . . ?
 Ag01 Ag05 Ag04 57.85(3) . . ?
 Ag01 Ag05 Ag09 57.43(3) . . ?
 Ag01 Ag05 Ag0C 58.23(3) . . ?
 Ag01 Ag05 Ag0E 117.48(5) . . ?
 Ag01 Ag05 Ag0J 111.86(4) . . ?
 Ag02 Ag05 Ag03 59.98(3) . . ?
 Ag02 Ag05 Ag04 61.19(3) . . ?
 Ag02 Ag05 Ag09 108.14(4) . . ?
 Ag02 Ag05 Ag0C 109.67(4) . . ?
 Ag02 Ag05 Ag0E 175.26(5) . . ?
 Ag02 Ag05 Ag0J 72.75(4) . . ?
 Ag03 Ag05 Ag04 108.81(4) . . ?
 Ag03 Ag05 Ag09 61.28(4) . . ?
 Ag03 Ag05 Ag0C 107.96(4) . . ?
 Ag03 Ag05 Ag0E 121.66(4) . . ?
 Ag03 Ag05 Ag0J 128.91(5) . . ?
 Ag04 Ag05 Ag09 105.95(4) . . ?
 Ag04 Ag05 Ag0C 60.84(3) . . ?
 Ag04 Ag05 Ag0J 57.74(3) . . ?
 Ag09 Ag05 Ag0J 161.66(5) . . ?
 Ag0C Ag05 Ag09 56.98(3) . . ?
 Ag0C Ag05 Ag0J 105.04(4) . . ?
 Ag0E Ag05 Ag04 114.54(5) . . ?
 Ag0E Ag05 Ag09 70.47(4) . . ?
 Ag0E Ag05 Ag0C 65.69(4) . . ?
 Ag0E Ag05 Ag0J 107.07(4) . . ?
 S1_11 Ag05 Ag01 153.18(9) . . ?
 S1_11 Ag05 Ag02 119.10(9) . . ?
 S1_11 Ag05 Ag03 146.11(9) . . ?
 S1_11 Ag05 Ag04 96.71(9) . . ?
 S1_11 Ag05 Ag09 132.76(9) . . ?
 S1_11 Ag05 Ag0C 103.79(9) . . ?
 S1_11 Ag05 Ag0E 62.43(8) . . ?
 S1_11 Ag05 Ag0J 49.86(8) . . ?
 Ag01 Ag06 Ag04 58.69(3) . . ?
 Ag01 Ag06 Ag07 57.46(3) . . ?
 Ag01 Ag06 Ag0A 58.57(3) . . ?
 Ag01 Ag06 Ag0B 56.81(3) . . ?
 Ag01 Ag06 Ag0C 57.72(3) . . ?
 Ag01 Ag06 Ag0H 108.84(4) . . ?
 Ag01 Ag06 Ag0M 114.96(4) . . ?
 Ag01 Ag06 Ag0N 103.77(4) . . ?
 Ag04 Ag06 Ag07 107.32(4) . . ?
 Ag04 Ag06 Ag0A 59.96(4) . . ?
 Ag04 Ag06 Ag0B 107.21(4) . . ?
 Ag04 Ag06 Ag0C 61.71(3) . . ?
 Ag04 Ag06 Ag0H 122.55(5) . . ?
 Ag04 Ag06 Ag0M 122.73(5) . . ?
 Ag04 Ag06 Ag0N 60.95(3) . . ?
 Ag07 Ag06 Ag0B 59.54(3) . . ?
 Ag07 Ag06 Ag0C 57.17(3) . . ?
 Ag07 Ag06 Ag0H 107.77(4) . . ?
 Ag07 Ag06 Ag0M 63.70(4) . . ?
 Ag07 Ag06 Ag0N 106.10(4) . . ?
 Ag0A Ag06 Ag07 108.02(4) . . ?
 Ag0A Ag06 Ag0B 60.08(3) . . ?
 Ag0A Ag06 Ag0C 108.58(4) . . ?
 Ag0A Ag06 Ag0H 66.64(4) . . ?
 Ag0A Ag06 Ag0M 171.55(5) . . ?
 Ag0A Ag06 Ag0N 117.81(4) . . ?
 Ag0B Ag06 Ag0H 58.07(3) . . ?
 Ag0B Ag06 Ag0N 159.55(4) . . ?
 Ag0C Ag06 Ag0B 105.16(4) . . ?
 Ag0C Ag06 Ag0H 163.06(5) . . ?
 Ag0C Ag06 Ag0N 55.02(3) . . ?
 Ag0H Ag06 Ag0N 141.90(4) . . ?
 Ag0M Ag06 Ag0B 112.25(4) . . ?
 Ag0M Ag06 Ag0C 68.94(4) . . ?
 Ag0M Ag06 Ag0H 113.25(4) . . ?
 Ag0M Ag06 Ag0N 67.91(4) . . ?
 S1_3 Ag06 Ag01 154.09(9) . . ?
 S1_3 Ag06 Ag04 141.98(9) . . ?
 S1_3 Ag06 Ag07 110.10(9) . . ?
 S1_3 Ag06 Ag0A 112.85(9) . . ?
 S1_3 Ag06 Ag0B 97.36(9) . . ?
 S1_3 Ag06 Ag0C 138.51(10) . . ?
 S1_3 Ag06 Ag0H 50.09(9) . . ?
 S1_3 Ag06 Ag0M 70.39(9) . . ?
 S1_3 Ag06 Ag0N 101.61(9) . . ?
 Ag01 Ag07 Ag06 58.48(3) . . ?
 Ag01 Ag07 Ag08 58.14(3) . . ?
 Ag01 Ag07 Ag09 59.10(3) . . ?
 Ag01 Ag07 Ag0B 57.67(3) . . ?
 Ag01 Ag07 Ag0C 59.79(4) . . ?
 Ag01 Ag07 Ag0G 107.12(4) . . ?
 Ag01 Ag07 Ag0K 119.69(5) . . ?
 Ag01 Ag07 Ag0M 111.06(4) . . ?
 Ag06 Ag07 Ag08 107.57(4) . . ?
 Ag06 Ag07 Ag0B 61.12(3) . . ?
 Ag06 Ag07 Ag0G 163.22(5) . . ?
 Ag06 Ag07 Ag0M 58.32(3) . . ?
 Ag08 Ag07 Ag0G 55.65(3) . . ?
 Ag08 Ag07 Ag0M 165.57(5) . . ?
 Ag09 Ag07 Ag06 109.11(4) . . ?
 Ag09 Ag07 Ag08 60.66(4) . . ?
 Ag09 Ag07 Ag0B 107.21(4) . . ?
 Ag09 Ag07 Ag0C 59.89(4) . . ?
 Ag09 Ag07 Ag0G 64.59(3) . . ?
 Ag09 Ag07 Ag0K 123.19(5) . . ?
 Ag09 Ag07 Ag0M 124.26(5) . . ?
 Ag0B Ag07 Ag08 57.64(3) . . ?
 Ag0B Ag07 Ag0G 104.75(4) . . ?
 Ag0B Ag07 Ag0M 109.15(4) . . ?
 Ag0C Ag07 Ag06 61.97(3) . . ?
 Ag0C Ag07 Ag08 108.87(4) . . ?
 Ag0C Ag07 Ag0B 110.20(4) . . ?
 Ag0C Ag07 Ag0G 120.50(4) . . ?
 Ag0C Ag07 Ag0K 176.50(5) . . ?
 Ag0C Ag07 Ag0M 68.56(4) . . ?
 Ag0K Ag07 Ag06 114.64(4) . . ?
 Ag0K Ag07 Ag08 72.63(4) . . ?
 Ag0K Ag07 Ag0B 67.73(4) . . ?
 Ag0K Ag07 Ag0G 62.98(3) . . ?
 Ag0K Ag07 Ag0M 109.17(4) . . ?
 Ag0M Ag07 Ag0G 138.40(4) . . ?
 S1_14 Ag07 Ag01 155.83(9) . . ?
 S1_14 Ag07 Ag06 97.50(9) . . ?
 S1_14 Ag07 Ag08 136.98(9) . . ?
 S1_14 Ag07 Ag09 141.04(9) . . ?
 S1_14 Ag07 Ag0B 110.48(9) . . ?
 S1_14 Ag07 Ag0C 113.72(9) . . ?
 S1_14 Ag07 Ag0G 96.12(9) . . ?
 S1_14 Ag07 Ag0K 65.20(9) . . ?
 S1_14 Ag07 Ag0M 49.70(9) . . ?
 Ag01 Ag08 Ag03 57.75(3) . . ?
 Ag01 Ag08 Ag07 57.39(3) . . ?
 Ag01 Ag08 Ag09 57.74(3) . . ?
 Ag01 Ag08 Ag0B 58.68(3) . . ?
 Ag01 Ag08 Ag0D 59.26(3) . . ?
 Ag01 Ag08 Ag0G 118.09(5) . . ?
 Ag01 Ag08 Ag0O 107.71(4) . . ?
 Ag03 Ag08 Ag0O 57.20(3) . . ?
 Ag07 Ag08 Ag03 106.23(4) . . ?
 Ag07 Ag08 Ag0G 68.99(4) . . ?
 Ag07 Ag08 Ag0O 163.39(5) . . ?
 Ag09 Ag08 Ag03 60.56(3) . . ?
 Ag09 Ag08 Ag07 57.56(3) . . ?
 Ag09 Ag08 Ag0G 68.93(4) . . ?
 Ag09 Ag08 Ag0O 109.50(4) . . ?
 Ag0B Ag08 Ag03 107.74(4) . . ?
 Ag0B Ag08 Ag07 61.07(3) . . ?
 Ag0B Ag08 Ag09 107.48(4) . . ?
 Ag0B Ag08 Ag0D 60.02(4) . . ?
 Ag0B Ag08 Ag0G 118.60(5) . . ?
 Ag0B Ag08 Ag0O 119.78(4) . . ?
 Ag0D Ag08 Ag03 60.38(3) . . ?
 Ag0D Ag08 Ag07 108.51(4) . . ?
 Ag0D Ag08 Ag09 109.02(4) . . ?
 Ag0D Ag08 Ag0G 177.31(5) . . ?
 Ag0D Ag08 Ag0O 63.79(4) . . ?
 Ag0G Ag08 Ag03 119.00(4) . . ?
 Ag0G Ag08 Ag0O 118.34(4) . . ?
 S1_12 Ag08 Ag01 150.89(10) . . ?
 S1_12 Ag08 Ag03 93.14(9) . . ?
 S1_12 Ag08 Ag07 142.53(10) . . ?
 S1_12 Ag08 Ag09 110.00(10) . . ?
 S1_12 Ag08 Ag0B 142.41(10) . . ?
 S1_12 Ag08 Ag0D 108.95(10) . . ?
 S1_12 Ag08 Ag0G 73.58(10) . . ?
 S1_12 Ag08 Ag0O 48.12(9) . . ?
 Ag01 Ag09 Ag03 57.95(3) . . ?
 Ag01 Ag09 Ag05 57.48(3) . . ?
 Ag01 Ag09 Ag07 59.15(3) . . ?
 Ag01 Ag09 Ag08 58.54(3) . . ?
 Ag01 Ag09 Ag0C 59.87(3) . . ?
 Ag01 Ag09 Ag0E 103.10(4) . . ?
 Ag01 Ag09 Ag0G 107.69(4) . . ?
 Ag01 Ag09 Ag0P 116.71(5) . . ?
 Ag03 Ag09 Ag0E 104.02(4) . . ?
 Ag03 Ag09 Ag0G 108.25(4) . . ?
 Ag05 Ag09 Ag03 57.54(3) . . ?
 Ag05 Ag09 Ag0E 53.43(3) . . ?
 Ag05 Ag09 Ag0G 162.76(5) . . ?
 Ag07 Ag09 Ag03 109.48(4) . . ?
 Ag07 Ag09 Ag05 108.18(4) . . ?
 Ag07 Ag09 Ag08 61.78(4) . . ?
 Ag07 Ag09 Ag0E 118.15(4) . . ?
 Ag07 Ag09 Ag0G 65.32(3) . . ?
 Ag07 Ag09 Ag0P 170.55(5) . . ?
 Ag08 Ag09 Ag03 60.46(3) . . ?
 Ag08 Ag09 Ag05 106.64(4) . . ?
 Ag08 Ag09 Ag0E 159.90(4) . . ?
 Ag08 Ag09 Ag0G 56.13(3) . . ?
 Ag0C Ag09 Ag03 108.45(4) . . ?
 Ag0C Ag09 Ag05 61.32(4) . . ?
 Ag0C Ag09 Ag07 60.06(4) . . ?
 Ag0C Ag09 Ag08 109.90(4) . . ?
 Ag0C Ag09 Ag0E 60.62(3) . . ?
 Ag0C Ag09 Ag0G 121.35(4) . . ?
 Ag0C Ag09 Ag0P 126.61(5) . . ?
 Ag0G Ag09 Ag0E 143.77(4) . . ?
 Ag0P Ag09 Ag03 63.04(4) . . ?
 Ag0P Ag09 Ag05 73.32(4) . . ?
 Ag0P Ag09 Ag08 108.78(5) . . ?
 Ag0P Ag09 Ag0E 70.49(4) . . ?
 Ag0P Ag09 Ag0G 110.45(4) . . ?
 S1_4 Ag09 Ag01 146.10(10) . . ?
 S1_4 Ag09 Ag03 104.56(10) . . ?
 S1_4 Ag09 Ag05 141.59(9) . . ?
 S1_4 Ag09 Ag07 109.98(9) . . ?
 S1_4 Ag09 Ag08 87.72(9) . . ?
 S1_4 Ag09 Ag0C 146.95(10) . . ?
 S1_4 Ag09 Ag0E 109.66(9) . . ?
 S1_4 Ag09 Ag0G 46.32(8) . . ?
 S1_4 Ag09 Ag0P 68.32(9) . . ?
 Ag01 Ag0A Ag02 57.50(3) . . ?
 Ag01 Ag0A Ag04 58.97(3) . . ?
 Ag01 Ag0A Ag06 59.56(3) . . ?
 Ag01 Ag0A Ag0B 57.88(3) . . ?
 Ag01 Ag0A Ag0D 57.57(3) . . ?
 Ag01 Ag0A Ag0F 107.08(4) . . ?
 Ag01 Ag0A Ag0H 104.72(4) . . ?
 Ag01 Ag0A Ag0L 112.47(4) . . ?
 Ag02 Ag0A Ag0D 59.59(3) . . ?
 Ag02 Ag0A Ag0F 55.83(3) . . ?
 Ag02 Ag0A Ag0H 161.53(4) . . ?
 Ag04 Ag0A Ag02 60.93(3) . . ?
 Ag04 Ag0A Ag06 59.83(4) . . ?
 Ag04 Ag0A Ag0B 108.90(4) . . ?
 Ag04 Ag0A Ag0D 108.58(4) . . ?
 Ag04 Ag0A Ag0F 65.58(4) . . ?
 Ag04 Ag0A Ag0H 116.45(4) . . ?
 Ag04 Ag0A Ag0L 170.27(5) . . ?
 Ag06 Ag0A Ag02 108.49(4) . . ?
 Ag06 Ag0A Ag0B 62.37(4) . . ?
 Ag06 Ag0A Ag0D 108.36(4) . . ?
 Ag06 Ag0A Ag0F 121.81(4) . . ?
 Ag06 Ag0A Ag0H 60.19(3) . . ?
 Ag06 Ag0A Ag0L 121.39(5) . . ?
 Ag0B Ag0A Ag02 105.78(4) . . ?
 Ag0B Ag0A Ag0D 57.34(3) . . ?
 Ag0B Ag0A Ag0F 161.52(5) . . ?
 Ag0B Ag0A Ag0H 56.61(3) . . ?
 Ag0D Ag0A Ag0F 106.46(4) . . ?
 Ag0D Ag0A Ag0H 108.10(4) . . ?
 Ag0F Ag0A Ag0H 141.87(4) . . ?
 Ag0L Ag0A Ag02 111.24(5) . . ?
 Ag0L Ag0A Ag0B 66.48(4) . . ?
 Ag0L Ag0A Ag0D 61.69(4) . . ?
 Ag0L Ag0A Ag0F 115.90(5) . . ?
 Ag0L Ag0A Ag0H 68.89(4) . . ?
 S1_6 Ag0A Ag01 150.60(10) . . ?
 S1_6 Ag0A Ag02 93.12(9) . . ?
 S1_6 Ag0A Ag04 110.10(9) . . ?
 S1_6 Ag0A Ag06 142.55(10) . . ?
 S1_6 Ag0A Ag0B 141.00(10) . . ?
 S1_6 Ag0A Ag0D 108.95(9) . . ?
 S1_6 Ag0A Ag0F 48.24(9) . . ?
 S1_6 Ag0A Ag0H 104.42(9) . . ?
 S1_6 Ag0A Ag0L 74.97(9) . . ?
 Ag01 Ag0B Ag06 57.83(3) . . ?
 Ag01 Ag0B Ag07 57.70(3) . . ?
 Ag01 Ag0B Ag08 59.49(3) . . ?
 Ag01 Ag0B Ag0A 57.97(3) . . ?
 Ag01 Ag0B Ag0D 59.52(4) . . ?
 Ag01 Ag0B Ag0H 113.77(4) . . ?
 Ag01 Ag0B Ag0K 108.03(4) . . ?
 Ag01 Ag0B Ag0L 104.18(4) . . ?
 Ag06 Ag0B Ag0K 103.15(4) . . ?
 Ag06 Ag0B Ag0L 108.16(4) . . ?
 Ag07 Ag0B Ag06 59.34(3) . . ?
 Ag07 Ag0B Ag0H 111.34(4) . . ?
 Ag07 Ag0B Ag0K 54.87(3) . . ?
 Ag07 Ag0B Ag0L 161.17(5) . . ?
 Ag08 Ag0B Ag06 109.07(4) . . ?
 Ag08 Ag0B Ag07 61.29(3) . . ?
 Ag08 Ag0B Ag0A 109.56(4) . . ?
 Ag08 Ag0B Ag0D 60.01(3) . . ?
 Ag08 Ag0B Ag0H 171.62(5) . . ?
 Ag08 Ag0B Ag0K 68.64(4) . . ?
 Ag08 Ag0B Ag0L 116.18(4) . . ?
 Ag0A Ag0B Ag06 57.55(3) . . ?
 Ag0A Ag0B Ag07 105.82(4) . . ?
 Ag0A Ag0B Ag0H 67.54(4) . . ?
 Ag0A Ag0B Ag0K 159.72(5) . . ?
 Ag0A Ag0B Ag0L 56.25(3) . . ?
 Ag0D Ag0B Ag06 108.72(4) . . ?
 Ag0D Ag0B Ag07 108.68(4) . . ?
 Ag0D Ag0B Ag0A 62.61(3) . . ?
 Ag0D Ag0B Ag0H 122.25(5) . . ?
 Ag0D Ag0B Ag0K 125.76(4) . . ?
 Ag0D Ag0B Ag0L 59.79(3) . . ?
 Ag0H Ag0B Ag06 62.61(3) . . ?
 Ag0H Ag0B Ag0K 111.14(4) . . ?
 Ag0H Ag0B Ag0L 69.31(4) . . ?
 Ag0L Ag0B Ag0K 143.59(4) . . ?
 S1_13 Ag0B Ag01 149.67(10) . . ?
 S1_13 Ag0B Ag06 104.77(10) . . ?
 S1_13 Ag0B Ag07 92.36(10) . . ?
 S1_13 Ag0B Ag08 112.90(9) . . ?
 S1_13 Ag0B Ag0A 137.46(9) . . ?
 S1_13 Ag0B Ag0D 146.16(10) . . ?
 S1_13 Ag0B Ag0H 70.06(8) . . ?
 S1_13 Ag0B Ag0K 47.96(8) . . ?
 S1_13 Ag0B Ag0L 105.05(9) . . ?
 Ag01 Ag0C Ag04 57.02(3) . . ?
 Ag01 Ag0C Ag05 57.33(3) . . ?
 Ag01 Ag0C Ag06 57.82(3) . . ?
 Ag01 Ag0C Ag07 58.81(4) . . ?
 Ag01 Ag0C Ag09 58.85(4) . . ?
 Ag01 Ag0C Ag0E 107.87(4) . . ?
 Ag01 Ag0C Ag0M 103.73(4) . . ?
 Ag01 Ag0C Ag0N 114.30(5) . . ?
 Ag04 Ag0C Ag0E 105.32(4) . . ?
 Ag04 Ag0C Ag0M 106.58(4) . . ?
 Ag05 Ag0C Ag04 59.29(3) . . ?
 Ag05 Ag0C Ag06 105.46(4) . . ?
 Ag05 Ag0C Ag0E 55.86(3) . . ?
 Ag05 Ag0C Ag0M 160.06(5) . . ?
 Ag06 Ag0C Ag04 56.98(3) . . ?
 Ag06 Ag0C Ag0E 160.88(5) . . ?
 Ag06 Ag0C Ag0M 55.25(3) . . ?
 Ag07 Ag0C Ag04 106.48(4) . . ?
 Ag07 Ag0C Ag05 108.47(4) . . ?
 Ag07 Ag0C Ag06 60.86(3) . . ?
 Ag07 Ag0C Ag0E 125.34(4) . . ?
 Ag07 Ag0C Ag0M 59.68(3) . . ?
 Ag07 Ag0C Ag0N 120.27(5) . . ?
 Ag09 Ag0C Ag04 108.45(4) . . ?
 Ag09 Ag0C Ag05 61.70(4) . . ?
 Ag09 Ag0C Ag06 108.36(4) . . ?
 Ag09 Ag0C Ag07 60.05(4) . . ?
 Ag09 Ag0C Ag0E 68.23(4) . . ?
 Ag09 Ag0C Ag0M 116.19(4) . . ?
 Ag09 Ag0C Ag0N 172.48(5) . . ?
 Ag0E Ag0C Ag0M 143.73(4) . . ?
 Ag0N Ag0C Ag04 64.05(4) . . ?
 Ag0N Ag0C Ag05 112.59(4) . . ?
 Ag0N Ag0C Ag06 67.58(4) . . ?
 Ag0N Ag0C Ag0E 113.36(4) . . ?
 Ag0N Ag0C Ag0M 67.27(4) . . ?
 S1_8 Ag0C Ag01 153.27(10) . . ?
 S1_8 Ag0C Ag04 110.02(9) . . ?
 S1_8 Ag0C Ag05 96.01(9) . . ?
 S1_8 Ag0C Ag06 138.76(9) . . ?
 S1_8 Ag0C Ag07 142.85(9) . . ?
 S1_8 Ag0C Ag09 112.81(9) . . ?
 S1_8 Ag0C Ag0E 49.69(9) . . ?
 S1_8 Ag0C Ag0M 102.49(9) . . ?
 S1_8 Ag0C Ag0N 71.77(9) . . ?
 Ag01 Ag0D Ag02 57.20(3) . . ?
 Ag01 Ag0D Ag03 58.24(3) . . ?
 Ag01 Ag0D Ag08 59.19(3) . . ?
 Ag01 Ag0D Ag0A 56.84(3) . . ?
 Ag01 Ag0D Ag0B 58.64(4) . . ?
 Ag01 Ag0D Ag0I 113.85(5) . . ?
 Ag01 Ag0D Ag0L 108.04(4) . . ?
 Ag01 Ag0D Ag0O 107.66(4) . . ?
 Ag02 Ag0D Ag0A 59.36(3) . . ?
 Ag02 Ag0D Ag0L 107.51(4) . . ?
 Ag02 Ag0D Ag0O 108.12(4) . . ?
 Ag03 Ag0D Ag02 57.85(3) . . ?
 Ag03 Ag0D Ag0A 105.91(4) . . ?
 Ag03 Ag0D Ag0I 69.44(4) . . ?
 Ag03 Ag0D Ag0L 163.25(5) . . ?
 Ag03 Ag0D Ag0O 57.56(3) . . ?
 Ag08 Ag0D Ag02 107.72(4) . . ?
 Ag08 Ag0D Ag03 61.85(3) . . ?
 Ag08 Ag0D Ag0A 107.52(4) . . ?
 Ag08 Ag0D Ag0B 59.97(3) . . ?
 Ag08 Ag0D Ag0I 124.68(5) . . ?
 Ag08 Ag0D Ag0L 121.71(5) . . ?
 Ag08 Ag0D Ag0O 63.79(4) . . ?
 Ag0A Ag0D Ag0L 57.43(3) . . ?
 Ag0A Ag0D Ag0O 163.24(5) . . ?
 Ag0B Ag0D Ag02 107.77(4) . . ?
 Ag0B Ag0D Ag03 108.85(4) . . ?
 Ag0B Ag0D Ag0A 60.05(3) . . ?
 Ag0B Ag0D Ag0I 169.16(5) . . ?
 Ag0B Ag0D Ag0L 65.81(4) . . ?
 Ag0B Ag0D Ag0O 119.74(4) . . ?
 Ag0I Ag0D Ag02 61.95(4) . . ?
 Ag0I Ag0D Ag0A 109.64(4) . . ?
 Ag0I Ag0D Ag0L 112.60(5) . . ?
 Ag0I Ag0D Ag0O 68.97(4) . . ?
 Ag0L Ag0D Ag0O 139.17(5) . . ?
 S1_10 Ag0D Ag01 152.93(9) . . ?
 S1_10 Ag0D Ag02 108.99(9) . . ?
 S1_10 Ag0D Ag03 138.15(9) . . ?
 S1_10 Ag0D Ag08 142.78(9) . . ?
 S1_10 Ag0D Ag0A 96.24(9) . . ?
 S1_10 Ag0D Ag0B 112.97(9) . . ?
 S1_10 Ag0D Ag0I 69.80(9) . . ?
 S1_10 Ag0D Ag0L 50.56(9) . . ?
 S1_10 Ag0D Ag0O 98.69(9) . . ?
 Ag05 Ag0E Ag09 56.10(3) . . ?
 Ag05 Ag0E Ag0C 58.45(3) . . ?
 Ag0C Ag0E Ag09 51.15(3) . . ?
 S1_8 Ag0E Ag05 98.91(9) . . ?
 S1_8 Ag0E Ag09 97.68(9) . . ?
 S1_8 Ag0E Ag0C 50.51(9) . . ?
 S1_8 Ag0E S1_11 95.76(11) . . ?
 S1_11 Ag0E Ag05 52.54(8) . . ?
 S1_11 Ag0E Ag09 108.55(8) . . ?
 S1_11 Ag0E Ag0C 92.35(8) . . ?
 S1_15 Ag0E Ag05 102.46(10) . . ?
 S1_15 Ag0E Ag09 80.87(9) . . ?
 S1_15 Ag0E Ag0C 131.66(10) . . ?
 S1_15 Ag0E S1_8 152.86(13) . . ?
 S1_15 Ag0E S1_11 110.48(12) . . ?
 Ag02 Ag0F Ag04 55.93(3) . . ?
 Ag02 Ag0F Ag0A 57.02(3) . . ?
 Ag0A Ag0F Ag04 51.42(3) . . ?
 S1_6 Ag0F Ag02 94.67(9) . . ?
 S1_6 Ag0F Ag04 97.32(9) . . ?
 S1_6 Ag0F Ag0A 48.93(9) . . ?
 S1_9 Ag0F Ag02 96.49(9) . . ?
 S1_9 Ag0F Ag04 89.75(9) . . ?
 S1_9 Ag0F Ag0A 140.20(10) . . ?
 S1_9 Ag0F S1_6 168.79(13) . . ?
 Ag08 Ag0G Ag07 55.36(3) . . ?
 Ag08 Ag0G Ag09 54.94(3) . . ?
 Ag08 Ag0G Ag0K 66.85(4) . . ?
 Ag09 Ag0G Ag07 50.09(3) . . ?
 Ag0K Ag0G Ag07 51.17(3) . . ?
 Ag0K Ag0G Ag09 98.57(4) . . ?
 S1_4 Ag0G Ag07 96.32(9) . . ?
 S1_4 Ag0G Ag08 87.70(9) . . ?
 S1_4 Ag0G Ag09 47.58(8) . . ?
 S1_4 Ag0G Ag0K 146.14(9) . . ?
 S1_16 Ag0G Ag07 96.78(9) . . ?
 S1_16 Ag0G Ag08 102.23(10) . . ?
 S1_16 Ag0G Ag09 145.86(9) . . ?
 S1_16 Ag0G Ag0K 47.30(9) . . ?
 S1_16 Ag0G S1_4 166.56(12) . . ?
 Ag06 Ag0H Ag0A 53.18(3) . . ?
 Ag0B Ag0H Ag06 59.32(3) . . ?
 Ag0B Ag0H Ag0A 55.85(3) . . ?
 S1_3 Ag0H Ag06 52.10(9) . . ?
 S1_3 Ag0H Ag0A 102.03(9) . . ?
 S1_3 Ag0H Ag0B 100.01(9) . . ?
 S1_17 Ag0H Ag06 141.48(10) . . ?
 S1_17 Ag0H Ag0A 89.89(10) . . ?
 S1_17 Ag0H Ag0B 92.74(10) . . ?
 S1_17 Ag0H S1_3 165.99(13) . . ?
 Ag02 Ag0I Ag03 52.72(3) . . ?
 Ag0D Ag0I Ag02 59.27(3) . . ?
 Ag0D Ag0I Ag03 55.02(3) . . ?
 S1_2 Ag0I Ag02 53.01(9) . . ?
 S1_2 Ag0I Ag03 102.46(10) . . ?
 S1_2 Ag0I Ag0D 101.11(9) . . ?
 S1_18 Ag0I Ag02 140.55(11) . . ?
 S1_18 Ag0I Ag03 87.89(10) . . ?
 S1_18 Ag0I Ag0D 98.69(10) . . ?
 S1_18 Ag0I S1_2 160.15(14) . . ?
 Ag04 Ag0J Ag05 58.39(3) . . ?
 Ag04 Ag0J S1_7 50.16(7) . . ?
 S1_7 Ag0J Ag05 93.13(8) . . ?
 S1_9 Ag0J Ag04 100.24(10) . . ?
 S1_9 Ag0J Ag05 132.20(10) . . ?
 S1_9 Ag0J S1_7 103.94(12) . . ?
 S1_9 Ag0J S1_11 157.05(14) . . ?
 S1_11 Ag0J Ag04 99.33(9) . . ?
 S1_11 Ag0J Ag05 52.45(9) . . ?
 S1_11 Ag0J S1_7 97.78(12) . . ?
 Ag07 Ag0K Ag0B 57.40(3) . . ?
 Ag07 Ag0K Ag0G 65.84(4) . . ?
 Ag07 Ag0K S1_14 51.24(7) . . ?
 Ag0B Ag0K Ag0G 100.21(4) . . ?
 S1_13 Ag0K Ag07 95.22(9) . . ?
 S1_13 Ag0K Ag0B 48.87(9) . . ?
 S1_13 Ag0K Ag0G 148.46(10) . . ?
 S1_13 Ag0K S1_14 96.92(12) . . ?
 S1_14 Ag0K Ag0B 93.47(8) . . ?
 S1_14 Ag0K Ag0G 90.29(8) . . ?
 S1_16 Ag0K Ag07 110.70(10) . . ?
 S1_16 Ag0K Ag0B 138.75(10) . . ?
 S1_16 Ag0K Ag0G 46.96(9) . . ?
 S1_16 Ag0K S1_13 151.54(14) . . ?
 S1_16 Ag0K S1_14 108.29(12) . . ?
 Ag0A Ag0L Ag0B 57.27(3) . . ?
 Ag0A Ag0L Ag0D 60.88(3) . . ?
 Ag0D Ag0L Ag0B 54.40(3) . . ?
 S1_10 Ag0L Ag0A 100.96(9) . . ?
 S1_10 Ag0L Ag0B 104.43(9) . . ?
 S1_10 Ag0L Ag0D 52.99(9) . . ?
 S1_17 Ag0L Ag0A 99.95(10) . . ?
 S1_17 Ag0L Ag0B 87.44(10) . . ?
 S1_17 Ag0L Ag0D 141.84(10) . . ?
 S1_17 Ag0L S1_10 159.08(14) . . ?
 Ag06 Ag0M Ag07 57.98(3) . . ?
 Ag06 Ag0M Ag0C 55.81(3) . . ?
 Ag07 Ag0M Ag0C 51.75(3) . . ?
 S1_1 Ag0M Ag06 94.27(10) . . ?
 S1_1 Ag0M Ag07 140.81(10) . . ?
 S1_1 Ag0M Ag0C 90.51(10) . . ?
 S1_1 Ag0M S1_14 166.36(13) . . ?
 S1_14 Ag0M Ag06 98.86(10) . . ?
 S1_14 Ag0M Ag07 51.75(9) . . ?
 S1_14 Ag0M Ag0C 99.89(9) . . ?
 Ag04 Ag0N Ag06 52.85(3) . . ?
 Ag0C Ag0N Ag04 59.43(3) . . ?
 Ag0C Ag0N Ag06 57.41(3) . . ?
 S1_1 Ag0N Ag04 139.97(10) . . ?
 S1_1 Ag0N Ag06 87.15(10) . . ?
 S1_1 Ag0N Ag0C 103.02(10) . . ?
 S1_1 Ag0N S1_7 158.24(13) . . ?
 S1_7 Ag0N Ag04 51.56(9) . . ?
 S1_7 Ag0N Ag06 101.35(9) . . ?
 S1_7 Ag0N Ag0C 98.40(9) . . ?
 Ag03 Ag0O Ag08 57.07(3) . . ?
 Ag03 Ag0O Ag0D 56.19(3) . . ?
 Ag08 Ag0O Ag0D 52.42(3) . . ?
 S1_12 Ag0O Ag03 94.21(10) . . ?
 S1_12 Ag0O Ag08 49.63(9) . . ?
 S1_12 Ag0O Ag0D 99.49(9) . . ?
 S1_18 Ag0O Ag03 96.65(10) . . ?
 S1_18 Ag0O Ag08 142.24(10) . . ?
 S1_18 Ag0O Ag0D 91.16(10) . . ?
 S1_18 Ag0O S1_12 167.81(13) . . ?
 Ag09 Ag0P Ag03 59.69(3) . . ?
 S1_5 Ag0P Ag03 52.25(8) . . ?
 S1_5 Ag0P Ag09 103.31(9) . . ?
 S1_15 Ag0P Ag03 137.19(10) . . ?
 S1_15 Ag0P Ag09 91.87(9) . . ?
 S1_15 Ag0P S1_5 164.34(13) . . ?
 C03L P018 C04J 106.0(8) . . ?
 C03R P018 C03L 110.3(8) . . ?
 C03R P018 C04J 113.6(9) . . ?
 C04V P018 C03L 111.2(8) . . ?
 C04V P018 C03R 108.2(8) . . ?
 C04V P018 C04J 107.6(8) . . ?
 C04X C02X H02X 118.7 . . ?
 C04X C02X C052 122.7(17) . . ?
 C052 C02X H02X 118.7 . . ?
 C03L C03G H03G 121.3 . . ?
 C05C C03G H03G 121.3 . . ?
 C05C C03G C03L 117.4(17) . . ?
 C03G C03L P018 117.3(13) . . ?
 C04B C03L P018 121.4(13) . . ?
 C04B C03L C03G 121.3(15) . . ?
 C03T C03R P018 122.9(13) . . ?
 C03T C03R C063 119.0(18) . . ?
 C063 C03R P018 118.1(14) . . ?
 C03R C03T H03T 118.5 . . ?
 C05A C03T C03R 122.9(17) . . ?
 C05A C03T H03T 118.5 . . ?
 C03L C04B H04B 120.1 . . ?
 C05T C04B C03L 119.8(18) . . ?
 C05T C04B H04B 120.1 . . ?
 Cl01 C04H H04A 109.2 . . ?
 Cl01 C04H H04C 109.2 . . ?
 Cl0A C04H Cl01 112.3(10) . . ?
 Cl0A C04H H04A 109.2 . . ?
 Cl0A C04H H04C 109.2 . . ?
 H04A C04H H04C 107.9 . . ?
 C05J C04J P018 117.6(14) . . ?
 C05J C04J C05O 124.9(19) . . ?
 C05O C04J P018 117.3(17) . . ?
 C05E C04V P018 120.4(15) . . ?
 C05E C04V C05Q 116.8(16) . . ?
 C05Q C04V P018 122.5(14) . . ?
 C02X C04X H04X 120.3 . . ?
 C02X C04X C05E 119.3(18) . . ?
 C05E C04X H04X 120.3 . . ?
 C02X C052 H052 121.2 . . ?
 C02X C052 C05Q 117.5(18) . . ?
 C05Q C052 H052 121.2 . . ?
 C03T C05A H05A 121.1 . . ?
 C03T C05A C05X 117.8(18) . . ?
 C05X C05A H05A 121.1 . . ?
 C03G C05C H05C 119.3 . . ?
 C03G C05C C05N 121.4(18) . . ?
 C05N C05C H05C 119.3 . . ?
 C04V C05E C04X 121.2(18) . . ?
 C04V C05E H05E 119.4 . . ?
 C04X C05E H05E 119.4 . . ?
 H05B C05I H05D 107.2 . . ?
 C060 C05I H05B 107.9 . . ?
 C060 C05I H05D 107.9 . . ?
 C0AA C05I H05B 107.9 . . ?
 C0AA C05I H05D 107.9 . . ?
 C0AA C05I C060 118(2) . . ?
 C04J C05J H05J 119.7 . . ?
 C04J C05J C05U 120.5(19) . . ?
 C05U C05J H05J 119.7 . . ?
 C05O C05K H05K 119.5 . . ?
 C C05K H05K 119.5 . . ?
 C C05K C05O 121(2) . . ?
 C05C C05N H05N 121.1 . . ?
 C05T C05N C05C 117.8(18) . . ?
 C05T C05N H05N 121.1 . . ?
 C04J C05O C05K 112(2) . . ?
 C04J C05O H05O 123.8 . . ?
 C05K C05O H05O 123.8 . . ?
 C04V C05Q C052 122.4(18) . . ?
 C04V C05Q H05Q 118.8 . . ?
 C052 C05Q H05Q 118.8 . . ?
 H05F C05R H05G 109.5 . . ?
 H05F C05R H05H 109.5 . . ?
 H05G C05R H05H 109.5 . . ?
 C065 C05R H05F 109.5 . . ?
 C065 C05R H05G 109.5 . . ?
 C065 C05R H05H 109.5 . . ?
 C04B C05T C05N 122(2) . . ?
 C04B C05T H05T 118.9 . . ?
 C05N C05T H05T 118.9 . . ?
 C05J C05U H05U 121.5 . . ?
 C C05U C05J 117(2) . . ?
 C C05U H05U 121.5 . . ?
 C05A C05X H05X 119.7 . . ?
 C05A C05X C061 121(2) . . ?
 C061 C05X H05X 119.7 . . ?
 C05I C060 H06A 108.0 . . ?
 C05I C060 H06B 108.0 . . ?
 H06A C060 H06B 107.2 . . ?
 C065 C060 C05I 117(2) . . ?
 C065 C060 H06A 108.0 . . ?
 C065 C060 H06B 108.0 . . ?
 C05X C061 H061 119.8 . . ?
 C063 C061 C05X 120(2) . . ?
 C063 C061 H061 119.8 . . ?
 H06C C062 H06D 109.5 . . ?
 H06C C062 H06E 109.5 . . ?
 H06D C062 H06E 109.5 . . ?
 C0AA C062 H06C 109.5 . . ?
 C0AA C062 H06D 109.5 . . ?
 C0AA C062 H06E 109.5 . . ?
 C03R C063 H063 120.5 . . ?
 C061 C063 C03R 119.1(19) . . ?
 C061 C063 H063 120.5 . . ?
 C05R C065 H06F 106.9 . . ?
 C05R C065 H06G 106.9 . . ?
 C060 C065 C05R 122(2) . . ?
 C060 C065 H06F 106.9 . . ?
 C060 C065 H06G 106.9 . . ?
 H06F C065 H06G 106.7 . . ?
 C05K C C05U 124(2) . . ?
 C05K C H 118.0 . . ?
 C05U C H 118.0 . . ?
 C05I C0AA C062 116(2) . . ?
 C05I C0AA H0AA 108.2 . . ?
 C05I C0AA H0AB 108.2 . . ?
 C062 C0AA H0AA 108.2 . . ?
 C062 C0AA H0AB 108.2 . . ?
 H0AA C0AA H0AB 107.4 . . ?
 Ag0N S1_1 Ag0M 92.80(13) . . ?
 C1_1 S1_1 Ag0M 109.5(4) . . ?
 C1_1 S1_1 Ag0N 102.7(5) . . ?
 C2_1 C1_1 S1_1 118.7(11) . . ?
 C6_1 C1_1 S1_1 123.7(11) . . ?
 C6_1 C1_1 C2_1 117.2(13) . . ?
 C1_1 C2_1 C7_1 123.2(14) . . ?
 C3_1 C2_1 C1_1 117.6(14) . . ?
 C3_1 C2_1 C7_1 119.0(13) . . ?
 C2_1 C3_1 H3_1 118.7 . . ?
 C4_1 C3_1 C2_1 122.6(15) . . ?
 C4_1 C3_1 H3_1 118.7 . . ?
 C3_1 C4_1 C8_1 120.5(15) . . ?
 C5_1 C4_1 C3_1 119.6(15) . . ?
 C5_1 C4_1 C8_1 119.8(15) . . ?
 C4_1 C5_1 H5_1 120.1 . . ?
 C4_1 C5_1 C6_1 119.7(15) . . ?
 C6_1 C5_1 H5_1 120.1 . . ?
 C1_1 C6_1 H6_1 118.5 . . ?
 C5_1 C6_1 C1_1 123.1(15) . . ?
 C5_1 C6_1 H6_1 118.5 . . ?
 C2_1 C7_1 H7A_1 109.5 . . ?
 C2_1 C7_1 H7B_1 109.5 . . ?
 C2_1 C7_1 H7C_1 109.5 . . ?
 H7A_1 C7_1 H7B_1 109.5 . . ?
 H7A_1 C7_1 H7C_1 109.5 . . ?
 H7B_1 C7_1 H7C_1 109.5 . . ?
 C4_1 C8_1 H8A_1 109.5 . . ?
 C4_1 C8_1 H8B_1 109.5 . . ?
 C4_1 C8_1 H8C_1 109.5 . . ?
 H8A_1 C8_1 H8B_1 109.5 . . ?
 H8A_1 C8_1 H8C_1 109.5 . . ?
 H8B_1 C8_1 H8C_1 109.5 . . ?
 Ag0I S1_2 Ag02 76.49(11) . . ?
 C1_2 S1_2 Ag02 105.3(5) . . ?
 C1_2 S1_2 Ag0I 106.0(4) . . ?
 C2_2 C1_2 S1_2 119.2(11) . . ?
 C6_2 C1_2 S1_2 122.0(11) . . ?
 C6_2 C1_2 C2_2 118.6(13) . . ?
 C1_2 C2_2 C7_2 121.2(12) . . ?
 C3_2 C2_2 C1_2 118.4(13) . . ?
 C3_2 C2_2 C7_2 120.3(13) . . ?
 C2_2 C3_2 H3_2 118.4 . . ?
 C2_2 C3_2 C4_2 123.3(14) . . ?
 C4_2 C3_2 H3_2 118.4 . . ?
 C3_2 C4_2 C5_2 117.4(14) . . ?
 C3_2 C4_2 C8_2 122.8(14) . . ?
 C5_2 C4_2 C8_2 119.8(14) . . ?
 C4_2 C5_2 H5_2 119.6 . . ?
 C4_2 C5_2 C6_2 120.8(14) . . ?
 C6_2 C5_2 H5_2 119.6 . . ?
 C1_2 C6_2 C5_2 121.5(14) . . ?
 C1_2 C6_2 H6_2 119.2 . . ?
 C5_2 C6_2 H6_2 119.2 . . ?
 C2_2 C7_2 H7A_2 109.5 . . ?
 C2_2 C7_2 H7B_2 109.5 . . ?
 C2_2 C7_2 H7C_2 109.5 . . ?
 H7A_2 C7_2 H7B_2 109.5 . . ?
 H7A_2 C7_2 H7C_2 109.5 . . ?
 H7B_2 C7_2 H7C_2 109.5 . . ?
 C4_2 C8_2 H8A_2 109.5 . . ?
 C4_2 C8_2 H8B_2 109.5 . . ?
 C4_2 C8_2 H8C_2 109.5 . . ?
 H8A_2 C8_2 H8B_2 109.5 . . ?
 H8A_2 C8_2 H8C_2 109.5 . . ?
 H8B_2 C8_2 H8C_2 109.5 . . ?
 Ag0H S1_3 Ag06 77.81(11) . . ?
 C1_3 S1_3 Ag06 109.2(5) . . ?
 C1_3 S1_3 Ag0H 106.2(5) . . ?
 C2_3 C1_3 S1_3 120.4(10) . . ?
 C6_3 C1_3 S1_3 121.7(11) . . ?
 C6_3 C1_3 C2_3 117.9(12) . . ?
 C1_3 C2_3 C7_3 122.2(12) . . ?
 C3_3 C2_3 C1_3 118.0(13) . . ?
 C3_3 C2_3 C7_3 119.7(12) . . ?
 C2_3 C3_3 H3_3 117.9 . . ?
 C4_3 C3_3 C2_3 124.2(13) . . ?
 C4_3 C3_3 H3_3 117.9 . . ?
 C3_3 C4_3 C8_3 121.6(14) . . ?
 C5_3 C4_3 C3_3 117.0(13) . . ?
 C5_3 C4_3 C8_3 121.5(14) . . ?
 C4_3 C5_3 H5_3 119.4 . . ?
 C4_3 C5_3 C6_3 121.2(14) . . ?
 C6_3 C5_3 H5_3 119.4 . . ?
 C1_3 C6_3 H6_3 119.1 . . ?
 C5_3 C6_3 C1_3 121.8(14) . . ?
 C5_3 C6_3 H6_3 119.1 . . ?
 C2_3 C7_3 H7A_3 109.5 . . ?
 C2_3 C7_3 H7B_3 109.5 . . ?
 C2_3 C7_3 H7C_3 109.5 . . ?
 H7A_3 C7_3 H7B_3 109.5 . . ?
 H7A_3 C7_3 H7C_3 109.5 . . ?
 H7B_3 C7_3 H7C_3 109.5 . . ?
 C4_3 C8_3 H8A_3 109.5 . . ?
 C4_3 C8_3 H8B_3 109.5 . . ?
 C4_3 C8_3 H8C_3 109.5 . . ?
 H8A_3 C8_3 H8B_3 109.5 . . ?
 H8A_3 C8_3 H8C_3 109.5 . . ?
 H8B_3 C8_3 H8C_3 109.5 . . ?
 Ag0G S1_4 Ag09 86.10(11) . . ?
 C1_4 S1_4 Ag09 108.3(4) . . ?
 C1_4 S1_4 Ag0G 104.8(4) . . ?
 C2_4 C1_4 S1_4 120.1(11) . . ?
 C2_4 C1_4 C6_4 119.4(13) . . ?
 C6_4 C1_4 S1_4 120.4(10) . . ?
 C1_4 C2_4 C7_4 121.4(12) . . ?
 C3_4 C2_4 C1_4 117.2(13) . . ?
 C3_4 C2_4 C7_4 121.2(12) . . ?
 C2_4 C3_4 H3_4 117.8 . . ?
 C4_4 C3_4 C2_4 124.4(13) . . ?
 C4_4 C3_4 H3_4 117.8 . . ?
 C3_4 C4_4 C5_4 118.3(14) . . ?
 C3_4 C4_4 C8_4 122.1(14) . . ?
 C5_4 C4_4 C8_4 119.7(14) . . ?
 C4_4 C5_4 H5_4 119.7 . . ?
 C4_4 C5_4 C6_4 120.5(14) . . ?
 C6_4 C5_4 H5_4 119.7 . . ?
 C1_4 C6_4 H6_4 120.0 . . ?
 C5_4 C6_4 C1_4 120.1(13) . . ?
 C5_4 C6_4 H6_4 120.0 . . ?
 C2_4 C7_4 H7A_4 109.5 . . ?
 C2_4 C7_4 H7B_4 109.5 . . ?
 C2_4 C7_4 H7C_4 109.5 . . ?
 H7A_4 C7_4 H7B_4 109.5 . . ?
 H7A_4 C7_4 H7C_4 109.5 . . ?
 H7B_4 C7_4 H7C_4 109.5 . . ?
 C4_4 C8_4 H8A_4 109.5 . . ?
 C4_4 C8_4 H8B_4 109.5 . . ?
 C4_4 C8_4 H8C_4 109.5 . . ?
 H8A_4 C8_4 H8B_4 109.5 . . ?
 H8A_4 C8_4 H8C_4 109.5 . . ?
 H8B_4 C8_4 H8C_4 109.5 . . ?
 Ag0P S1_5 Ag03 77.35(11) . . ?
 C1_5 S1_5 Ag03 107.0(4) . . ?
 C1_5 S1_5 Ag0P 106.1(5) . . ?
 C2_5 C1_5 S1_5 118.8(10) . . ?
 C6_5 C1_5 S1_5 121.2(10) . . ?
 C6_5 C1_5 C2_5 119.8(13) . . ?
 C1_5 C2_5 C7_5 123.2(12) . . ?
 C3_5 C2_5 C1_5 116.2(12) . . ?
 C3_5 C2_5 C7_5 120.5(12) . . ?
 C2_5 C3_5 H3_5 118.1 . . ?
 C4_5 C3_5 C2_5 123.8(13) . . ?
 C4_5 C3_5 H3_5 118.1 . . ?
 C3_5 C4_5 C5_5 117.6(13) . . ?
 C3_5 C4_5 C8_5 121.3(13) . . ?
 C5_5 C4_5 C8_5 121.1(13) . . ?
 C4_5 C5_5 H5_5 120.3 . . ?
 C6_5 C5_5 C4_5 119.3(13) . . ?
 C6_5 C5_5 H5_5 120.3 . . ?
 C1_5 C6_5 H6_5 118.4 . . ?
 C5_5 C6_5 C1_5 123.1(13) . . ?
 C5_5 C6_5 H6_5 118.4 . . ?
 C2_5 C7_5 H7A_5 109.5 . . ?
 C2_5 C7_5 H7B_5 109.5 . . ?
 C2_5 C7_5 H7C_5 109.5 . . ?
 H7A_5 C7_5 H7B_5 109.5 . . ?
 H7A_5 C7_5 H7C_5 109.5 . . ?
 H7B_5 C7_5 H7C_5 109.5 . . ?
 C4_5 C8_5 H8A_5 109.5 . . ?
 C4_5 C8_5 H8B_5 109.5 . . ?
 C4_5 C8_5 H8C_5 109.5 . . ?
 H8A_5 C8_5 H8B_5 109.5 . . ?
 H8A_5 C8_5 H8C_5 109.5 . . ?
 H8B_5 C8_5 H8C_5 109.5 . . ?
 Ag0F S1_6 Ag0A 82.83(11) . . ?
 C1_6 S1_6 Ag0A 107.5(5) . . ?
 C1_6 S1_6 Ag0F 106.2(5) . . ?
 C2_6 C1_6 S1_6 116.7(11) . . ?
 C6_6 C1_6 S1_6 123.1(10) . . ?
 C6_6 C1_6 C2_6 120.1(13) . . ?
 C1_6 C2_6 C3_6 117.2(14) . . ?
 C1_6 C2_6 C7_6 124.4(13) . . ?
 C3_6 C2_6 C7_6 118.4(13) . . ?
 C2_6 C3_6 H3_6 118.6 . . ?
 C4_6 C3_6 C2_6 122.8(13) . . ?
 C4_6 C3_6 H3_6 118.6 . . ?
 C3_6 C4_6 C8_6 121.2(14) . . ?
 C5_6 C4_6 C3_6 117.0(14) . . ?
 C5_6 C4_6 C8_6 121.8(15) . . ?
 C4_6 C5_6 H5_6 118.7 . . ?
 C4_6 C5_6 C6_6 122.6(15) . . ?
 C6_6 C5_6 H5_6 118.7 . . ?
 C1_6 C6_6 H6_6 119.9 . . ?
 C5_6 C6_6 C1_6 120.3(13) . . ?
 C5_6 C6_6 H6_6 119.9 . . ?
 C2_6 C7_6 H7A_6 109.5 . . ?
 C2_6 C7_6 H7B_6 109.5 . . ?
 C2_6 C7_6 H7C_6 109.5 . . ?
 H7A_6 C7_6 H7B_6 109.5 . . ?
 H7A_6 C7_6 H7C_6 109.5 . . ?
 H7B_6 C7_6 H7C_6 109.5 . . ?
 C4_6 C8_6 H8A_6 109.5 . . ?
 C4_6 C8_6 H8B_6 109.5 . . ?
 C4_6 C8_6 H8C_6 109.5 . . ?
 H8A_6 C8_6 H8B_6 109.5 . . ?
 H8A_6 C8_6 H8C_6 109.5 . . ?
 H8B_6 C8_6 H8C_6 109.5 . . ?
 Ag04 S1_7 Ag0J 64.24(9) . . ?
 Ag0N S1_7 Ag04 78.96(11) . . ?
 Ag0N S1_7 Ag0J 130.77(14) . . ?
 C1_7 S1_7 Ag04 106.2(5) . . ?
 C1_7 S1_7 Ag0J 115.2(5) . . ?
 C1_7 S1_7 Ag0N 105.3(4) . . ?
 C2_7 C1_7 S1_7 116.9(11) . . ?
 C6_7 C1_7 S1_7 122.2(11) . . ?
 C6_7 C1_7 C2_7 120.7(13) . . ?
 C1_7 C2_7 C7_7 122.8(13) . . ?
 C3_7 C2_7 C1_7 115.8(14) . . ?
 C3_7 C2_7 C7_7 121.3(14) . . ?
 C2_7 C3_7 H3_7 118.2 . . ?
 C2_7 C3_7 C4_7 123.6(14) . . ?
 C4_7 C3_7 H3_7 118.2 . . ?
 C3_7 C4_7 C5_7 118.2(14) . . ?
 C3_7 C4_7 C8_7 121.7(14) . . ?
 C5_7 C4_7 C8_7 120.1(14) . . ?
 C4_7 C5_7 H5_7 120.5 . . ?
 C6_7 C5_7 C4_7 118.9(14) . . ?
 C6_7 C5_7 H5_7 120.5 . . ?
 C1_7 C6_7 C5_7 122.7(14) . . ?
 C1_7 C6_7 H6_7 118.6 . . ?
 C5_7 C6_7 H6_7 118.6 . . ?
 C2_7 C7_7 H7A_7 109.5 . . ?
 C2_7 C7_7 H7B_7 109.5 . . ?
 C2_7 C7_7 H7C_7 109.5 . . ?
 H7A_7 C7_7 H7B_7 109.5 . . ?
 H7A_7 C7_7 H7C_7 109.5 . . ?
 H7B_7 C7_7 H7C_7 109.5 . . ?
 C4_7 C8_7 H8A_7 109.5 . . ?
 C4_7 C8_7 H8B_7 109.5 . . ?
 C4_7 C8_7 H8C_7 109.5 . . ?
 H8A_7 C8_7 H8B_7 109.5 . . ?
 H8A_7 C8_7 H8C_7 109.5 . . ?
 H8B_7 C8_7 H8C_7 109.5 . . ?
 Ag0E S1_8 Ag0C 79.80(11) . . ?
 C1_8 S1_8 Ag0C 108.6(5) . . ?
 C1_8 S1_8 Ag0E 104.3(4) . . ?
 C2_8 C1_8 S1_8 120.8(11) . . ?
 C2_8 C1_8 C6_8 118.5(13) . . ?
 C6_8 C1_8 S1_8 120.7(11) . . ?
 C1_8 C2_8 C3_8 118.6(14) . . ?
 C1_8 C2_8 C7_8 121.2(13) . . ?
 C3_8 C2_8 C7_8 120.2(13) . . ?
 C2_8 C3_8 H3_8 118.5 . . ?
 C2_8 C3_8 C4_8 123.0(14) . . ?
 C4_8 C3_8 H3_8 118.5 . . ?
 C3_8 C4_8 C8_8 121.4(14) . . ?
 C5_8 C4_8 C3_8 117.5(13) . . ?
 C5_8 C4_8 C8_8 120.9(14) . . ?
 C4_8 C5_8 H5_8 120.0 . . ?
 C4_8 C5_8 C6_8 119.9(15) . . ?
 C6_8 C5_8 H5_8 120.0 . . ?
 C1_8 C6_8 H6_8 118.8 . . ?
 C5_8 C6_8 C1_8 122.4(14) . . ?
 C5_8 C6_8 H6_8 118.8 . . ?
 C2_8 C7_8 H7A_8 109.5 . . ?
 C2_8 C7_8 H7B_8 109.5 . . ?
 C2_8 C7_8 H7C_8 109.5 . . ?
 H7A_8 C7_8 H7B_8 109.5 . . ?
 H7A_8 C7_8 H7C_8 109.5 . . ?
 H7B_8 C7_8 H7C_8 109.5 . . ?
 C4_8 C8_8 H8A_8 109.5 . . ?
 C4_8 C8_8 H8B_8 109.5 . . ?
 C4_8 C8_8 H8C_8 109.5 . . ?
 H8A_8 C8_8 H8B_8 109.5 . . ?
 H8A_8 C8_8 H8C_8 109.5 . . ?
 H8B_8 C8_8 H8C_8 109.5 . . ?
 Ag0J S1_9 Ag0F 96.00(14) . . ?
 C1_9 S1_9 Ag0F 110.3(4) . . ?
 C1_9 S1_9 Ag0J 105.5(5) . . ?
 C2_9 C1_9 S1_9 118.3(12) . . ?
 C2_9 C1_9 C6_9 121.5(14) . . ?
 C6_9 C1_9 S1_9 120.1(11) . . ?
 C1_9 C2_9 C3_9 116.2(15) . . ?
 C1_9 C2_9 C7_9 124.6(14) . . ?
 C3_9 C2_9 C7_9 119.1(15) . . ?
 C2_9 C3_9 H3_9 118.9 . . ?
 C4_9 C3_9 C2_9 122.3(16) . . ?
 C4_9 C3_9 H3_9 118.9 . . ?
 C3_9 C4_9 C8_9 121.6(18) . . ?
 C5_9 C4_9 C3_9 119.3(16) . . ?
 C5_9 C4_9 C8_9 119.1(18) . . ?
 C4_9 C5_9 H5_9 119.5 . . ?
 C4_9 C5_9 C6_9 121.1(17) . . ?
 C6_9 C5_9 H5_9 119.5 . . ?
 C1_9 C6_9 H6_9 120.2 . . ?
 C5_9 C6_9 C1_9 119.6(16) . . ?
 C5_9 C6_9 H6_9 120.2 . . ?
 C2_9 C7_9 H7A_9 109.5 . . ?
 C2_9 C7_9 H7B_9 109.5 . . ?
 C2_9 C7_9 H7C_9 109.5 . . ?
 H7A_9 C7_9 H7B_9 109.5 . . ?
 H7A_9 C7_9 H7C_9 109.5 . . ?
 H7B_9 C7_9 H7C_9 109.5 . . ?
 C4_9 C8_9 H8A_9 109.5 . . ?
 C4_9 C8_9 H8B_9 109.5 . . ?
 C4_9 C8_9 H8C_9 109.5 . . ?
 H8A_9 C8_9 H8B_9 109.5 . . ?
 H8A_9 C8_9 H8C_9 109.5 . . ?
 H8B_9 C8_9 H8C_9 109.5 . . ?
 Ag0L S1_10 Ag0D 76.45(11) . . ?
 C1_10 S1_10 Ag0D 108.7(5) . . ?
 C1_10 S1_10 Ag0L 100.5(4) . . ?
 C2_10 C1_10 S1_10 120.0(11) . . ?
 C6_10 C1_10 S1_10 120.7(11) . . ?
 C6_10 C1_10 C2_10 119.2(14) . . ?
 C1_10 C2_10 C3_10 118.3(14) . . ?
 C1_10 C2_10 C7_10 121.1(14) . . ?
 C3_10 C2_10 C7_10 120.6(14) . . ?
 C2_10 C3_10 H3_10 118.5 . . ?
 C4_10 C3_10 C2_10 122.9(15) . . ?
 C4_10 C3_10 H3_10 118.5 . . ?
 C3_10 C4_10 C8_10 121.1(15) . . ?
 C5_10 C4_10 C3_10 117.6(15) . . ?
 C5_10 C4_10 C8_10 121.2(15) . . ?
 C4_10 C5_10 H5_10 119.4 . . ?
 C4_10 C5_10 C6_10 121.2(15) . . ?
 C6_10 C5_10 H5_10 119.4 . . ?
 C1_10 C6_10 C5_10 120.6(14) . . ?
 C1_10 C6_10 H6_10 119.7 . . ?
 C5_10 C6_10 H6_10 119.7 . . ?
 C2_10 C7_10 H7A_10 109.5 . . ?
 C2_10 C7_10 H7B_10 109.5 . . ?
 C2_10 C7_10 H7C_10 109.5 . . ?
 H7A_10 C7_10 H7B_10 109.5 . . ?
 H7A_10 C7_10 H7C_10 109.5 . . ?
 H7B_10 C7_10 H7C_10 109.5 . . ?
 C4_10 C8_10 H8A_10 109.5 . . ?
 C4_10 C8_10 H8B_10 109.5 . . ?
 C4_10 C8_10 H8C_10 109.5 . . ?
 H8A_10 C8_10 H8B_10 109.5 . . ?
 H8A_10 C8_10 H8C_10 109.5 . . ?
 H8B_10 C8_10 H8C_10 109.5 . . ?
 Ag05 S1_11 Ag0E 65.04(8) . . ?
 Ag0J S1_11 Ag05 77.69(11) . . ?
 Ag0J S1_11 Ag0E 133.13(14) . . ?
 C1_11 S1_11 Ag05 106.2(5) . . ?
 C1_11 S1_11 Ag0E 109.9(4) . . ?
 C1_11 S1_11 Ag0J 106.9(4) . . ?
 C2_11 C1_11 S1_11 120.4(11) . . ?
 C2_11 C1_11 C6_11 118.3(13) . . ?
 C6_11 C1_11 S1_11 121.3(11) . . ?
 C1_11 C2_11 C7_11 121.8(14) . . ?
 C3_11 C2_11 C1_11 119.0(14) . . ?
 C3_11 C2_11 C7_11 119.2(14) . . ?
 C2_11 C3_11 H3_11 118.6 . . ?
 C2_11 C3_11 C4_11 122.9(15) . . ?
 C4_11 C3_11 H3_11 118.6 . . ?
 C3_11 C4_11 C5_11 117.5(14) . . ?
 C3_11 C4_11 C8_11 122.5(14) . . ?
 C5_11 C4_11 C8_11 120.0(14) . . ?
 C4_11 C5_11 H5_11 120.2 . . ?
 C6_11 C5_11 C4_11 119.5(14) . . ?
 C6_11 C5_11 H5_11 120.2 . . ?
 C1_11 C6_11 H6_11 118.7 . . ?
 C5_11 C6_11 C1_11 122.7(14) . . ?
 C5_11 C6_11 H6_11 118.7 . . ?
 C2_11 C7_11 H7A_11 109.5 . . ?
 C2_11 C7_11 H7B_11 109.5 . . ?
 C2_11 C7_11 H7C_11 109.5 . . ?
 H7A_11 C7_11 H7B_11 109.5 . . ?
 H7A_11 C7_11 H7C_11 109.5 . . ?
 H7B_11 C7_11 H7C_11 109.5 . . ?
 C4_11 C8_11 H8A_11 109.5 . . ?
 C4_11 C8_11 H8B_11 109.5 . . ?
 C4_11 C8_11 H8C_11 109.5 . . ?
 H8A_11 C8_11 H8B_11 109.5 . . ?
 H8A_11 C8_11 H8C_11 109.5 . . ?
 H8B_11 C8_11 H8C_11 109.5 . . ?
 Ag0O S1_12 Ag08 82.25(11) . . ?
 C1_12 S1_12 Ag08 107.5(4) . . ?
 C1_12 S1_12 Ag0O 109.4(5) . . ?
 C2_12 C1_12 S1_12 119.4(11) . . ?
 C2_12 C1_12 C6_12 121.2(13) . . ?
 C6_12 C1_12 S1_12 119.4(10) . . ?
 C1_12 C2_12 C3_12 117.6(13) . . ?
 C1_12 C2_12 C7_12 122.6(13) . . ?
 C3_12 C2_12 C7_12 119.7(12) . . ?
 C2_12 C3_12 H3_12 118.4 . . ?
 C4_12 C3_12 C2_12 123.2(14) . . ?
 C4_12 C3_12 H3_12 118.4 . . ?
 C3_12 C4_12 C5_12 116.6(14) . . ?
 C3_12 C4_12 C8_12 121.2(14) . . ?
 C5_12 C4_12 C8_12 122.1(13) . . ?
 C4_12 C5_12 H5_12 119.4 . . ?
 C6_12 C5_12 C4_12 121.3(13) . . ?
 C6_12 C5_12 H5_12 119.4 . . ?
 C1_12 C6_12 H6_12 120.0 . . ?
 C5_12 C6_12 C1_12 120.1(13) . . ?
 C5_12 C6_12 H6_12 120.0 . . ?
 C2_12 C7_12 H7A_12 109.5 . . ?
 C2_12 C7_12 H7B_12 109.5 . . ?
 C2_12 C7_12 H7C_12 109.5 . . ?
 H7A_12 C7_12 H7B_12 109.5 . . ?
 H7A_12 C7_12 H7C_12 109.5 . . ?
 H7B_12 C7_12 H7C_12 109.5 . . ?
 C4_12 C8_12 H8A_12 109.5 . . ?
 C4_12 C8_12 H8B_12 109.5 . . ?
 C4_12 C8_12 H8C_12 109.5 . . ?
 H8A_12 C8_12 H8B_12 109.5 . . ?
 H8A_12 C8_12 H8C_12 109.5 . . ?
 H8B_12 C8_12 H8C_12 109.5 . . ?
 Ag0K S1_13 Ag0B 83.17(11) . . ?
 C1_13 S1_13 Ag0B 108.9(5) . . ?
 C1_13 S1_13 Ag0K 102.6(4) . . ?
 C2_13 C1_13 S1_13 117.8(13) . . ?
 C6_13 C1_13 S1_13 122.3(11) . . ?
 C6_13 C1_13 C2_13 119.8(14) . . ?
 C1_13 C2_13 C7_13 122.1(15) . . ?
 C3_13 C2_13 C1_13 115.6(16) . . ?
 C3_13 C2_13 C7_13 122.2(14) . . ?
 C2_13 C3_13 H3_13 117.2 . . ?
 C4_13 C3_13 C2_13 125.6(17) . . ?
 C4_13 C3_13 H3_13 117.2 . . ?
 C3_13 C4_13 C5_13 116.4(17) . . ?
 C3_13 C4_13 C8_13 123.6(17) . . ?
 C5_13 C4_13 C8_13 120.0(18) . . ?
 C4_13 C5_13 H5_13 119.0 . . ?
 C4_13 C5_13 C6_13 121.9(17) . . ?
 C6_13 C5_13 H5_13 119.0 . . ?
 C1_13 C6_13 H6_13 119.7 . . ?
 C5_13 C6_13 C1_13 120.6(14) . . ?
 C5_13 C6_13 H6_13 119.7 . . ?
 C2_13 C7_13 H7A_13 109.5 . . ?
 C2_13 C7_13 H7B_13 109.5 . . ?
 C2_13 C7_13 H7C_13 109.5 . . ?
 H7A_13 C7_13 H7B_13 109.5 . . ?
 H7A_13 C7_13 H7C_13 109.5 . . ?
 H7B_13 C7_13 H7C_13 109.5 . . ?
 C4_13 C8_13 H8A_13 109.5 . . ?
 C4_13 C8_13 H8B_13 109.5 . . ?
 C4_13 C8_13 H8C_13 109.5 . . ?
 H8A_13 C8_13 H8B_13 109.5 . . ?
 H8A_13 C8_13 H8C_13 109.5 . . ?
 H8B_13 C8_13 H8C_13 109.5 . . ?
 Ag07 S1_14 Ag0K 63.56(9) . . ?
 Ag0M S1_14 Ag07 78.55(11) . . ?
 Ag0M S1_14 Ag0K 132.19(14) . . ?
 C1_14 S1_14 Ag07 106.6(5) . . ?
 C1_14 S1_14 Ag0K 109.7(5) . . ?
 C1_14 S1_14 Ag0M 108.2(5) . . ?
 C2_14 C1_14 S1_14 119.8(11) . . ?
 C2_14 C1_14 C6_14 118.7(13) . . ?
 C6_14 C1_14 S1_14 121.4(11) . . ?
 C1_14 C2_14 C7_14 121.1(13) . . ?
 C3_14 C2_14 C1_14 118.2(13) . . ?
 C3_14 C2_14 C7_14 120.6(13) . . ?
 C2_14 C3_14 H3_14 118.1 . . ?
 C4_14 C3_14 C2_14 123.8(14) . . ?
 C4_14 C3_14 H3_14 118.1 . . ?
 C3_14 C4_14 C5_14 117.6(14) . . ?
 C3_14 C4_14 C8_14 123.5(14) . . ?
 C5_14 C4_14 C8_14 118.9(14) . . ?
 C4_14 C5_14 H5_14 120.1 . . ?
 C6_14 C5_14 C4_14 119.9(14) . . ?
 C6_14 C5_14 H5_14 120.1 . . ?
 C1_14 C6_14 H6_14 119.1 . . ?
 C5_14 C6_14 C1_14 121.8(14) . . ?
 C5_14 C6_14 H6_14 119.1 . . ?
 C2_14 C7_14 H7A_14 109.5 . . ?
 C2_14 C7_14 H7B_14 109.5 . . ?
 C2_14 C7_14 H7C_14 109.5 . . ?
 H7A_14 C7_14 H7B_14 109.5 . . ?
 H7A_14 C7_14 H7C_14 109.5 . . ?
 H7B_14 C7_14 H7C_14 109.5 . . ?
 C4_14 C8_14 H8A_14 109.5 . . ?
 C4_14 C8_14 H8B_14 109.5 . . ?
 C4_14 C8_14 H8C_14 109.5 . . ?
 H8A_14 C8_14 H8B_14 109.5 . . ?
 H8A_14 C8_14 H8C_14 109.5 . . ?
 H8B_14 C8_14 H8C_14 109.5 . . ?
 Ag0P S1_15 Ag0E 97.99(13) . . ?
 C1_15 S1_15 Ag0E 115.3(5) . . ?
 C1_15 S1_15 Ag0P 103.3(5) . . ?
 C2_15 C1_15 S1_15 121.9(12) . . ?
 C2_15 C1_15 C6_15 120.1(14) . . ?
 C6_15 C1_15 S1_15 117.6(11) . . ?
 C1_15 C2_15 C3_15 116.5(15) . . ?
 C1_15 C2_15 C7_15 122.3(15) . . ?
 C3_15 C2_15 C7_15 121.2(16) . . ?
 C2_15 C3_15 H3_15 117.9 . . ?
 C4_15 C3_15 C2_15 124.1(17) . . ?
 C4_15 C3_15 H3_15 117.9 . . ?
 C3_15 C4_15 C8_15 120.2(16) . . ?
 C5_15 C4_15 C3_15 116.9(16) . . ?
 C5_15 C4_15 C8_15 122.9(16) . . ?
 C4_15 C5_15 H5_15 118.4 . . ?
 C4_15 C5_15 C6_15 123.1(17) . . ?
 C6_15 C5_15 H5_15 118.4 . . ?
 C1_15 C6_15 H6_15 120.4 . . ?
 C5_15 C6_15 C1_15 119.2(15) . . ?
 C5_15 C6_15 H6_15 120.4 . . ?
 C2_15 C7_15 H7A_15 109.5 . . ?
 C2_15 C7_15 H7B_15 109.5 . . ?
 C2_15 C7_15 H7C_15 109.5 . . ?
 H7A_15 C7_15 H7B_15 109.5 . . ?
 H7A_15 C7_15 H7C_15 109.5 . . ?
 H7B_15 C7_15 H7C_15 109.5 . . ?
 C4_15 C8_15 H8A_15 109.5 . . ?
 C4_15 C8_15 H8B_15 109.5 . . ?
 C4_15 C8_15 H8C_15 109.5 . . ?
 H8A_15 C8_15 H8B_15 109.5 . . ?
 H8A_15 C8_15 H8C_15 109.5 . . ?
 H8B_15 C8_15 H8C_15 109.5 . . ?
 Ag0G S1_16 Ag0K 85.75(12) . . ?
 C1_16 S1_16 Ag0G 110.5(5) . . ?
 C1_16 S1_16 Ag0K 104.5(5) . . ?
 C2_16 C1_16 S1_16 120.7(11) . . ?
 C6_16 C1_16 S1_16 119.3(11) . . ?
 C6_16 C1_16 C2_16 119.5(14) . . ?
 C1_16 C2_16 C3_16 117.6(14) . . ?
 C1_16 C2_16 C7_16 123.6(14) . . ?
 C3_16 C2_16 C7_16 118.8(13) . . ?
 C2_16 C3_16 H3_16 118.6 . . ?
 C4_16 C3_16 C2_16 122.8(14) . . ?
 C4_16 C3_16 H3_16 118.6 . . ?
 C3_16 C4_16 C8_16 119.6(15) . . ?
 C5_16 C4_16 C3_16 117.9(15) . . ?
 C5_16 C4_16 C8_16 122.5(14) . . ?
 C4_16 C5_16 H5_16 119.3 . . ?
 C4_16 C5_16 C6_16 121.4(15) . . ?
 C6_16 C5_16 H5_16 119.3 . . ?
 C1_16 C6_16 H6_16 119.6 . . ?
 C5_16 C6_16 C1_16 120.8(15) . . ?
 C5_16 C6_16 H6_16 119.6 . . ?
 C2_16 C7_16 H7A_16 109.5 . . ?
 C2_16 C7_16 H7B_16 109.5 . . ?
 C2_16 C7_16 H7C_16 109.5 . . ?
 H7A_16 C7_16 H7B_16 109.5 . . ?
 H7A_16 C7_16 H7C_16 109.5 . . ?
 H7B_16 C7_16 H7C_16 109.5 . . ?
 C4_16 C8_16 H8A_16 109.5 . . ?
 C4_16 C8_16 H8B_16 109.5 . . ?
 C4_16 C8_16 H8C_16 109.5 . . ?
 H8A_16 C8_16 H8B_16 109.5 . . ?
 H8A_16 C8_16 H8C_16 109.5 . . ?
 H8B_16 C8_16 H8C_16 109.5 . . ?
 Ag0L S1_17 Ag0H 93.88(13) . . ?
 C1_17 S1_17 Ag0H 113.7(5) . . ?
 C1_17 S1_17 Ag0L 101.4(5) . . ?
 C2_17 C1_17 S1_17 121.7(12) . . ?
 C2_17 C1_17 C6_17 119.2(14) . . ?
 C6_17 C1_17 S1_17 118.7(11) . . ?
 C1_17 C2_17 C3_17 118.1(15) . . ?
 C1_17 C2_17 C7_17 122.6(14) . . ?
 C3_17 C2_17 C7_17 119.3(14) . . ?
 C2_17 C3_17 H3_17 119.6 . . ?
 C4_17 C3_17 C2_17 120.9(15) . . ?
 C4_17 C3_17 H3_17 119.6 . . ?
 C3_17 C4_17 C5_17 120.9(15) . . ?
 C3_17 C4_17 C8_17 119.5(16) . . ?
 C5_17 C4_17 C8_17 119.4(16) . . ?
 C4_17 C5_17 H5_17 120.4 . . ?
 C6_17 C5_17 C4_17 119.2(17) . . ?
 C6_17 C5_17 H5_17 120.4 . . ?
 C1_17 C6_17 H6_17 119.3 . . ?
 C5_17 C6_17 C1_17 121.4(15) . . ?
 C5_17 C6_17 H6_17 119.3 . . ?
 C2_17 C7_17 H7A_17 109.5 . . ?
 C2_17 C7_17 H7B_17 109.5 . . ?
 C2_17 C7_17 H7C_17 109.5 . . ?
 H7A_17 C7_17 H7B_17 109.5 . . ?
 H7A_17 C7_17 H7C_17 109.5 . . ?
 H7B_17 C7_17 H7C_17 109.5 . . ?
 C4_17 C8_17 H8A_17 109.5 . . ?
 C4_17 C8_17 H8B_17 109.5 . . ?
 C4_17 C8_17 H8C_17 109.5 . . ?
 H8A_17 C8_17 H8B_17 109.5 . . ?
 H8A_17 C8_17 H8C_17 109.5 . . ?
 H8B_17 C8_17 H8C_17 109.5 . . ?
 Ag0I S1_18 Ag0O 93.40(14) . . ?
 C1_18 S1_18 Ag0I 102.2(5) . . ?
 C1_18 S1_18 Ag0O 112.1(5) . . ?
 C2_18 C1_18 S1_18 121.1(11) . . ?
 C6_18 C1_18 S1_18 119.5(11) . . ?
 C6_18 C1_18 C2_18 119.2(14) . . ?
 C1_18 C2_18 C7_18 121.0(14) . . ?
 C3_18 C2_18 C1_18 117.6(15) . . ?
 C3_18 C2_18 C7_18 121.4(14) . . ?
 C2_18 C3_18 H3_18 118.3 . . ?
 C4_18 C3_18 C2_18 123.4(16) . . ?
 C4_18 C3_18 H3_18 118.3 . . ?
 C3_18 C4_18 C8_18 121.1(17) . . ?
 C5_18 C4_18 C3_18 117.8(17) . . ?
 C5_18 C4_18 C8_18 121.1(18) . . ?
 C4_18 C5_18 H5_18 118.9 . . ?
 C4_18 C5_18 C6_18 122.2(18) . . ?
 C6_18 C5_18 H5_18 118.9 . . ?
 C1_18 C6_18 H6_18 120.2 . . ?
 C5_18 C6_18 C1_18 119.7(16) . . ?
 C5_18 C6_18 H6_18 120.2 . . ?
 C2_18 C7_18 H7A_18 109.5 . . ?
 C2_18 C7_18 H7B_18 109.5 . . ?
 C2_18 C7_18 H7C_18 109.5 . . ?
 H7A_18 C7_18 H7B_18 109.5 . . ?
 H7A_18 C7_18 H7C_18 109.5 . . ?
 H7B_18 C7_18 H7C_18 109.5 . . ?
 C4_18 C8_18 H8A_18 109.5 . . ?
 C4_18 C8_18 H8B_18 109.5 . . ?
 C4_18 C8_18 H8C_18 109.5 . . ?
 H8A_18 C8_18 H8B_18 109.5 . . ?
 H8A_18 C8_18 H8C_18 109.5 . . ?
 H8B_18 C8_18 H8C_18 109.5 . . ?

loop_
  _geom_torsion_atom_site_label_1
  _geom_torsion_atom_site_label_2
  _geom_torsion_atom_site_label_3
  _geom_torsion_atom_site_label_4
  _geom_torsion
  _geom_torsion_site_symmetry_1
  _geom_torsion_site_symmetry_2
  _geom_torsion_site_symmetry_3
  _geom_torsion_site_symmetry_4
  _geom_torsion_publ_flag
 Ag02 S1_2 C1_2 C2_2 168.2(9) . . . . ?
 Ag02 S1_2 C1_2 C6_2 -17.2(12) . . . . ?
 Ag03 S1_5 C1_5 C2_5 165.8(10) . . . . ?
 Ag03 S1_5 C1_5 C6_5 -18.6(13) . . . . ?
 Ag04 S1_7 C1_7 C2_7 167.0(10) . . . . ?
 Ag04 S1_7 C1_7 C6_7 -17.2(12) . . . . ?
 Ag05 S1_11 C1_11 C2_11 174.0(10) . . . . ?
 Ag05 S1_11 C1_11 C6_11 -6.4(12) . . . . ?
 Ag06 S1_3 C1_3 C2_3 167.9(10) . . . . ?
 Ag06 S1_3 C1_3 C6_3 -14.4(13) . . . . ?
 Ag07 S1_14 C1_14 C2_14 176.0(10) . . . . ?
 Ag07 S1_14 C1_14 C6_14 -8.1(12) . . . . ?
 Ag08 S1_12 C1_12 C2_12 171.6(10) . . . . ?
 Ag08 S1_12 C1_12 C6_12 -10.3(12) . . . . ?
 Ag09 S1_4 C1_4 C2_4 171.7(9) . . . . ?
 Ag09 S1_4 C1_4 C6_4 -10.3(12) . . . . ?
 Ag0A S1_6 C1_6 C2_6 175.2(9) . . . . ?
 Ag0A S1_6 C1_6 C6_6 -6.7(13) . . . . ?
 Ag0B S1_13 C1_13 C2_13 159.3(9) . . . . ?
 Ag0B S1_13 C1_13 C6_13 -23.8(12) . . . . ?
 Ag0C S1_8 C1_8 C2_8 160.7(10) . . . . ?
 Ag0C S1_8 C1_8 C6_8 -19.7(12) . . . . ?
 Ag0D S1_10 C1_10 C2_10 168.0(10) . . . . ?
 Ag0D S1_10 C1_10 C6_10 -11.0(12) . . . . ?
 Ag0E S1_8 C1_8 C2_8 76.8(12) . . . . ?
 Ag0E S1_8 C1_8 C6_8 -103.5(11) . . . . ?
 Ag0E S1_11 C1_11 C2_11 -117.3(11) . . . . ?
 Ag0E S1_11 C1_11 C6_11 62.4(12) . . . . ?
 Ag0E S1_15 C1_15 C2_15 43.1(13) . . . . ?
 Ag0E S1_15 C1_15 C6_15 -143.2(9) . . . . ?
 Ag0F S1_6 C1_6 C2_6 87.7(11) . . . . ?
 Ag0F S1_6 C1_6 C6_6 -94.1(12) . . . . ?
 Ag0F S1_9 C1_9 C2_9 -57.2(12) . . . . ?
 Ag0F S1_9 C1_9 C6_9 125.2(10) . . . . ?
 Ag0G S1_4 C1_4 C2_4 80.9(10) . . . . ?
 Ag0G S1_4 C1_4 C6_4 -101.1(10) . . . . ?
 Ag0G S1_16 C1_16 C2_16 -60.2(12) . . . . ?
 Ag0G S1_16 C1_16 C6_16 127.8(10) . . . . ?
 Ag0H S1_3 C1_3 C2_3 85.4(11) . . . . ?
 Ag0H S1_3 C1_3 C6_3 -96.8(11) . . . . ?
 Ag0H S1_17 C1_17 C2_17 -53.3(13) . . . . ?
 Ag0H S1_17 C1_17 C6_17 133.3(10) . . . . ?
 Ag0I S1_2 C1_2 C2_2 88.2(10) . . . . ?
 Ag0I S1_2 C1_2 C6_2 -97.2(11) . . . . ?
 Ag0I S1_18 C1_18 C2_18 -150.5(11) . . . . ?
 Ag0I S1_18 C1_18 C6_18 34.3(12) . . . . ?
 Ag0J S1_7 C1_7 C2_7 -124.3(10) . . . . ?
 Ag0J S1_7 C1_7 C6_7 51.5(13) . . . . ?
 Ag0J S1_9 C1_9 C2_9 -159.7(10) . . . . ?
 Ag0J S1_9 C1_9 C6_9 22.6(12) . . . . ?
 Ag0J S1_11 C1_11 C2_11 92.2(11) . . . . ?
 Ag0J S1_11 C1_11 C6_11 -88.1(11) . . . . ?
 Ag0K S1_13 C1_13 C2_13 72.3(10) . . . . ?
 Ag0K S1_13 C1_13 C6_13 -110.8(11) . . . . ?
 Ag0K S1_14 C1_14 C2_14 -116.8(10) . . . . ?
 Ag0K S1_14 C1_14 C6_14 59.2(12) . . . . ?
 Ag0K S1_16 C1_16 C2_16 -151.0(11) . . . . ?
 Ag0K S1_16 C1_16 C6_16 36.9(12) . . . . ?
 Ag0L S1_10 C1_10 C2_10 88.9(11) . . . . ?
 Ag0L S1_10 C1_10 C6_10 -90.1(11) . . . . ?
 Ag0L S1_17 C1_17 C2_17 -152.8(11) . . . . ?
 Ag0L S1_17 C1_17 C6_17 33.9(12) . . . . ?
 Ag0M S1_1 C1_1 C2_1 -62.9(11) . . . . ?
 Ag0M S1_1 C1_1 C6_1 124.2(11) . . . . ?
 Ag0M S1_14 C1_14 C2_14 92.9(11) . . . . ?
 Ag0M S1_14 C1_14 C6_14 -91.2(11) . . . . ?
 Ag0N S1_1 C1_1 C2_1 -160.5(10) . . . . ?
 Ag0N S1_1 C1_1 C6_1 26.6(12) . . . . ?
 Ag0N S1_7 C1_7 C2_7 84.3(11) . . . . ?
 Ag0N S1_7 C1_7 C6_7 -99.9(11) . . . . ?
 Ag0O S1_12 C1_12 C2_12 83.8(11) . . . . ?
 Ag0O S1_12 C1_12 C6_12 -98.0(11) . . . . ?
 Ag0O S1_18 C1_18 C2_18 -51.6(13) . . . . ?
 Ag0O S1_18 C1_18 C6_18 133.2(11) . . . . ?
 Ag0P S1_5 C1_5 C2_5 84.4(11) . . . . ?
 Ag0P S1_5 C1_5 C6_5 -99.9(11) . . . . ?
 Ag0P S1_15 C1_15 C2_15 148.7(11) . . . . ?
 Ag0P S1_15 C1_15 C6_15 -37.6(11) . . . . ?
 P018 C03L C04B C05T 178.5(13) . . . . ?
 P018 C03R C03T C05A -179.9(14) . . . . ?
 P018 C03R C063 C061 -179(2) . . . . ?
 P018 C04J C05J C05U -175.5(13) . . . . ?
 P018 C04J C05O C05K 176.5(12) . . . . ?
 P018 C04V C05E C04X 177.2(17) . . . . ?
 P018 C04V C05Q C052 -177.3(14) . . . . ?
 C02X C04X C05E C04V -2(3) . . . . ?
 C02X C052 C05Q C04V 2(3) . . . . ?
 C03G C03L C04B C05T 0(3) . . . . ?
 C03G C05C C05N C05T -1(2) . . . . ?
 C03L P018 C03R C03T -19.8(17) . . . . ?
 C03L P018 C03R C063 161.8(16) . . . . ?
 C03L P018 C04J C05J -35.5(16) . . . . ?
 C03L P018 C04J C05O 149.4(14) . . . . ?
 C03L P018 C04V C05E -74.0(18) . . . . ?
 C03L P018 C04V C05Q 99.3(16) . . . . ?
 C03L C03G C05C C05N 2(2) . . . . ?
 C03L C04B C05T C05N 1(3) . . . . ?
 C03R P018 C03L C03G 72.9(14) . . . . ?
 C03R P018 C03L C04B -105.6(15) . . . . ?
 C03R P018 C04J C05J -156.8(14) . . . . ?
 C03R P018 C04J C05O 28.1(16) . . . . ?
 C03R P018 C04V C05E 47.4(18) . . . . ?
 C03R P018 C04V C05Q -139.4(15) . . . . ?
 C03R C03T C05A C05X -1(3) . . . . ?
 C03T C03R C063 C061 3(3) . . . . ?
 C03T C05A C05X C061 2(3) . . . . ?
 C04J P018 C03L C03G -50.5(14) . . . . ?
 C04J P018 C03L C04B 131.1(14) . . . . ?
 C04J P018 C03R C03T 99.0(16) . . . . ?
 C04J P018 C03R C063 -79.4(18) . . . . ?
 C04J P018 C04V C05E 170.4(16) . . . . ?
 C04J P018 C04V C05Q -16.3(18) . . . . ?
 C04J C05J C05U C 1(3) . . . . ?
 C04V P018 C03L C03G -167.1(12) . . . . ?
 C04V P018 C03L C04B 14.5(17) . . . . ?
 C04V P018 C03R C03T -141.7(14) . . . . ?
 C04V P018 C03R C063 40.0(19) . . . . ?
 C04V P018 C04J C05J 83.6(15) . . . . ?
 C04V P018 C04J C05O -91.6(15) . . . . ?
 C04X C02X C052 C05Q 0(3) . . . . ?
 C052 C02X C04X C05E 0(3) . . . . ?
 C05A C05X C061 C063 -1(4) . . . . ?
 C05C C03G C03L P018 -179.8(12) . . . . ?
 C05C C03G C03L C04B -1(2) . . . . ?
 C05C C05N C05T C04B -1(3) . . . . ?
 C05E C04V C05Q C052 -4(3) . . . . ?
 C05I C060 C065 C05R -179(2) . . . . ?
 C05J C04J C05O C05K 2(3) . . . . ?
 C05J C05U C C05K -3(3) . . . . ?
 C05O C04J C05J C05U -1(3) . . . . ?
 C05O C05K C C05U 4(3) . . . . ?
 C05Q C04V C05E C04X 4(3) . . . . ?
 C05X C061 C063 C03R -2(4) . . . . ?
 C060 C05I C0AA C062 -174(2) . . . . ?
 C063 C03R C03T C05A -2(3) . . . . ?
 C C05K C05O C04J -3(3) . . . . ?
 C0AA C05I C060 C065 169(2) . . . . ?
 S1_1 C1_1 C2_1 C3_1 -177.7(11) . . . . ?
 S1_1 C1_1 C2_1 C7_1 8(2) . . . . ?
 S1_1 C1_1 C6_1 C5_1 178.6(12) . . . . ?
 C1_1 C2_1 C3_1 C4_1 1(2) . . . . ?
 C2_1 C1_1 C6_1 C5_1 6(2) . . . . ?
 C2_1 C3_1 C4_1 C5_1 1(2) . . . . ?
 C2_1 C3_1 C4_1 C8_1 -176.9(15) . . . . ?
 C3_1 C4_1 C5_1 C6_1 0(2) . . . . ?
 C4_1 C5_1 C6_1 C1_1 -4(2) . . . . ?
 C6_1 C1_1 C2_1 C3_1 -4(2) . . . . ?
 C6_1 C1_1 C2_1 C7_1 -179.1(15) . . . . ?
 C7_1 C2_1 C3_1 C4_1 176.4(15) . . . . ?
 C8_1 C4_1 C5_1 C6_1 177.9(15) . . . . ?
 S1_2 C1_2 C2_2 C3_2 174.4(10) . . . . ?
 S1_2 C1_2 C2_2 C7_2 -7.6(18) . . . . ?
 S1_2 C1_2 C6_2 C5_2 -174.6(10) . . . . ?
 C1_2 C2_2 C3_2 C4_2 0(2) . . . . ?
 C2_2 C1_2 C6_2 C5_2 0.1(19) . . . . ?
 C2_2 C3_2 C4_2 C5_2 0(2) . . . . ?
 C2_2 C3_2 C4_2 C8_2 -178.9(13) . . . . ?
 C3_2 C4_2 C5_2 C6_2 0(2) . . . . ?
 C4_2 C5_2 C6_2 C1_2 0(2) . . . . ?
 C6_2 C1_2 C2_2 C3_2 -0.4(19) . . . . ?
 C6_2 C1_2 C2_2 C7_2 177.6(12) . . . . ?
 C7_2 C2_2 C3_2 C4_2 -177.6(13) . . . . ?
 C8_2 C4_2 C5_2 C6_2 178.5(13) . . . . ?
 S1_3 C1_3 C2_3 C3_3 177.6(10) . . . . ?
 S1_3 C1_3 C2_3 C7_3 0.6(19) . . . . ?
 S1_3 C1_3 C6_3 C5_3 -176.9(11) . . . . ?
 C1_3 C2_3 C3_3 C4_3 1(2) . . . . ?
 C2_3 C1_3 C6_3 C5_3 1(2) . . . . ?
 C2_3 C3_3 C4_3 C5_3 -2(2) . . . . ?
 C2_3 C3_3 C4_3 C8_3 -179.8(14) . . . . ?
 C3_3 C4_3 C5_3 C6_3 2(2) . . . . ?
 C4_3 C5_3 C6_3 C1_3 -2(2) . . . . ?
 C6_3 C1_3 C2_3 C3_3 0(2) . . . . ?
 C6_3 C1_3 C2_3 C7_3 -177.2(13) . . . . ?
 C7_3 C2_3 C3_3 C4_3 177.6(14) . . . . ?
 C8_3 C4_3 C5_3 C6_3 -179.5(14) . . . . ?
 S1_4 C1_4 C2_4 C3_4 174.4(10) . . . . ?
 S1_4 C1_4 C2_4 C7_4 -1.6(17) . . . . ?
 S1_4 C1_4 C6_4 C5_4 -174.9(10) . . . . ?
 C1_4 C2_4 C3_4 C4_4 2(2) . . . . ?
 C2_4 C1_4 C6_4 C5_4 3.1(19) . . . . ?
 C2_4 C3_4 C4_4 C5_4 0(2) . . . . ?
 C2_4 C3_4 C4_4 C8_4 179.5(14) . . . . ?
 C3_4 C4_4 C5_4 C6_4 0(2) . . . . ?
 C4_4 C5_4 C6_4 C1_4 -1(2) . . . . ?
 C6_4 C1_4 C2_4 C3_4 -3.6(18) . . . . ?
 C6_4 C1_4 C2_4 C7_4 -179.6(12) . . . . ?
 C7_4 C2_4 C3_4 C4_4 178.2(13) . . . . ?
 C8_4 C4_4 C5_4 C6_4 179.8(13) . . . . ?
 S1_5 C1_5 C2_5 C3_5 176.8(11) . . . . ?
 S1_5 C1_5 C2_5 C7_5 -5(2) . . . . ?
 S1_5 C1_5 C6_5 C5_5 -174.7(11) . . . . ?
 C1_5 C2_5 C3_5 C4_5 -2(2) . . . . ?
 C2_5 C1_5 C6_5 C5_5 1(2) . . . . ?
 C2_5 C3_5 C4_5 C5_5 0(2) . . . . ?
 C2_5 C3_5 C4_5 C8_5 -179.8(14) . . . . ?
 C3_5 C4_5 C5_5 C6_5 2(2) . . . . ?
 C4_5 C5_5 C6_5 C1_5 -2(2) . . . . ?
 C6_5 C1_5 C2_5 C3_5 1(2) . . . . ?
 C6_5 C1_5 C2_5 C7_5 178.8(13) . . . . ?
 C7_5 C2_5 C3_5 C4_5 -179.5(14) . . . . ?
 C8_5 C4_5 C5_5 C6_5 -178.2(14) . . . . ?
 S1_6 C1_6 C2_6 C3_6 177.3(11) . . . . ?
 S1_6 C1_6 C2_6 C7_6 0.3(19) . . . . ?
 S1_6 C1_6 C6_6 C5_6 -177.2(11) . . . . ?
 C1_6 C2_6 C3_6 C4_6 1(2) . . . . ?
 C2_6 C1_6 C6_6 C5_6 1(2) . . . . ?
 C2_6 C3_6 C4_6 C5_6 0(2) . . . . ?
 C2_6 C3_6 C4_6 C8_6 -177.9(15) . . . . ?
 C3_6 C4_6 C5_6 C6_6 0(2) . . . . ?
 C4_6 C5_6 C6_6 C1_6 -1(2) . . . . ?
 C6_6 C1_6 C2_6 C3_6 -1(2) . . . . ?
 C6_6 C1_6 C2_6 C7_6 -177.9(14) . . . . ?
 C7_6 C2_6 C3_6 C4_6 177.9(14) . . . . ?
 C8_6 C4_6 C5_6 C6_6 177.8(15) . . . . ?
 S1_7 C1_7 C2_7 C3_7 176.5(11) . . . . ?
 S1_7 C1_7 C2_7 C7_7 -3(2) . . . . ?
 S1_7 C1_7 C6_7 C5_7 -175.1(11) . . . . ?
 C1_7 C2_7 C3_7 C4_7 -1(2) . . . . ?
 C2_7 C1_7 C6_7 C5_7 1(2) . . . . ?
 C2_7 C3_7 C4_7 C5_7 1(2) . . . . ?
 C2_7 C3_7 C4_7 C8_7 -177.6(15) . . . . ?
 C3_7 C4_7 C5_7 C6_7 0(2) . . . . ?
 C4_7 C5_7 C6_7 C1_7 -1(2) . . . . ?
 C6_7 C1_7 C2_7 C3_7 1(2) . . . . ?
 C6_7 C1_7 C2_7 C7_7 -178.6(14) . . . . ?
 C7_7 C2_7 C3_7 C4_7 177.8(14) . . . . ?
 C8_7 C4_7 C5_7 C6_7 179.0(14) . . . . ?
 S1_8 C1_8 C2_8 C3_8 -179.0(10) . . . . ?
 S1_8 C1_8 C2_8 C7_8 1(2) . . . . ?
 S1_8 C1_8 C6_8 C5_8 -179.7(11) . . . . ?
 C1_8 C2_8 C3_8 C4_8 -1(2) . . . . ?
 C2_8 C1_8 C6_8 C5_8 0(2) . . . . ?
 C2_8 C3_8 C4_8 C5_8 0(2) . . . . ?
 C2_8 C3_8 C4_8 C8_8 175.9(13) . . . . ?
 C3_8 C4_8 C5_8 C6_8 1(2) . . . . ?
 C4_8 C5_8 C6_8 C1_8 -1(2) . . . . ?
 C6_8 C1_8 C2_8 C3_8 1(2) . . . . ?
 C6_8 C1_8 C2_8 C7_8 -178.2(14) . . . . ?
 C7_8 C2_8 C3_8 C4_8 178.3(14) . . . . ?
 C8_8 C4_8 C5_8 C6_8 -174.7(13) . . . . ?
 S1_9 C1_9 C2_9 C3_9 -179.8(11) . . . . ?
 S1_9 C1_9 C2_9 C7_9 3(2) . . . . ?
 S1_9 C1_9 C6_9 C5_9 -179.4(11) . . . . ?
 C1_9 C2_9 C3_9 C4_9 0(2) . . . . ?
 C2_9 C1_9 C6_9 C5_9 3(2) . . . . ?
 C2_9 C3_9 C4_9 C5_9 1(2) . . . . ?
 C2_9 C3_9 C4_9 C8_9 -178.4(15) . . . . ?
 C3_9 C4_9 C5_9 C6_9 -1(2) . . . . ?
 C4_9 C5_9 C6_9 C1_9 -2(2) . . . . ?
 C6_9 C1_9 C2_9 C3_9 -2(2) . . . . ?
 C6_9 C1_9 C2_9 C7_9 -178.9(14) . . . . ?
 C7_9 C2_9 C3_9 C4_9 177.0(15) . . . . ?
 C8_9 C4_9 C5_9 C6_9 179.2(15) . . . . ?
 S1_10 C1_10 C2_10 C3_10 177.1(11) . . . . ?
 S1_10 C1_10 C2_10 C7_10 0.4(19) . . . . ?
 S1_10 C1_10 C6_10 C5_10 -177.0(11) . . . . ?
 C1_10 C2_10 C3_10 C4_10 1(2) . . . . ?
 C2_10 C1_10 C6_10 C5_10 4(2) . . . . ?
 C2_10 C3_10 C4_10 C5_10 2(2) . . . . ?
 C2_10 C3_10 C4_10 C8_10 179.2(14) . . . . ?
 C3_10 C4_10 C5_10 C6_10 -2(2) . . . . ?
 C4_10 C5_10 C6_10 C1_10 -1(2) . . . . ?
 C6_10 C1_10 C2_10 C3_10 -4(2) . . . . ?
 C6_10 C1_10 C2_10 C7_10 179.4(14) . . . . ?
 C7_10 C2_10 C3_10 C4_10 177.8(15) . . . . ?
 C8_10 C4_10 C5_10 C6_10 -179.2(14) . . . . ?
 S1_11 C1_11 C2_11 C3_11 179.0(11) . . . . ?
 S1_11 C1_11 C2_11 C7_11 0(2) . . . . ?
 S1_11 C1_11 C6_11 C5_11 -176.5(11) . . . . ?
 C1_11 C2_11 C3_11 C4_11 -1(2) . . . . ?
 C2_11 C1_11 C6_11 C5_11 3(2) . . . . ?
 C2_11 C3_11 C4_11 C5_11 0(2) . . . . ?
 C2_11 C3_11 C4_11 C8_11 -179.2(15) . . . . ?
 C3_11 C4_11 C5_11 C6_11 2(2) . . . . ?
 C4_11 C5_11 C6_11 C1_11 -4(2) . . . . ?
 C6_11 C1_11 C2_11 C3_11 -1(2) . . . . ?
 C6_11 C1_11 C2_11 C7_11 -179.6(14) . . . . ?
 C7_11 C2_11 C3_11 C4_11 178.2(14) . . . . ?
 C8_11 C4_11 C5_11 C6_11 -178.4(14) . . . . ?
 S1_12 C1_12 C2_12 C3_12 174.8(11) . . . . ?
 S1_12 C1_12 C2_12 C7_12 -2.1(19) . . . . ?
 S1_12 C1_12 C6_12 C5_12 -176.8(11) . . . . ?
 C1_12 C2_12 C3_12 C4_12 3(2) . . . . ?
 C2_12 C1_12 C6_12 C5_12 1(2) . . . . ?
 C2_12 C3_12 C4_12 C5_12 0(2) . . . . ?
 C2_12 C3_12 C4_12 C8_12 177.5(14) . . . . ?
 C3_12 C4_12 C5_12 C6_12 -2(2) . . . . ?
 C4_12 C5_12 C6_12 C1_12 1(2) . . . . ?
 C6_12 C1_12 C2_12 C3_12 -3(2) . . . . ?
 C6_12 C1_12 C2_12 C7_12 179.8(13) . . . . ?
 C7_12 C2_12 C3_12 C4_12 179.7(14) . . . . ?
 C8_12 C4_12 C5_12 C6_12 -179.6(14) . . . . ?
 S1_13 C1_13 C2_13 C3_13 175.7(10) . . . . ?
 S1_13 C1_13 C2_13 C7_13 -6.8(17) . . . . ?
 S1_13 C1_13 C6_13 C5_13 -175.4(10) . . . . ?
 C1_13 C2_13 C3_13 C4_13 -1(2) . . . . ?
 C2_13 C1_13 C6_13 C5_13 1(2) . . . . ?
 C2_13 C3_13 C4_13 C5_13 3(2) . . . . ?
 C2_13 C3_13 C4_13 C8_13 -176.0(15) . . . . ?
 C3_13 C4_13 C5_13 C6_13 -3(2) . . . . ?
 C4_13 C5_13 C6_13 C1_13 1(2) . . . . ?
 C6_13 C1_13 C2_13 C3_13 -1.3(19) . . . . ?
 C6_13 C1_13 C2_13 C7_13 176.2(12) . . . . ?
 C7_13 C2_13 C3_13 C4_13 -178.7(14) . . . . ?
 C8_13 C4_13 C5_13 C6_13 176.3(14) . . . . ?
 S1_14 C1_14 C2_14 C3_14 175.5(10) . . . . ?
 S1_14 C1_14 C2_14 C7_14 -2.0(18) . . . . ?
 S1_14 C1_14 C6_14 C5_14 -175.5(11) . . . . ?
 C1_14 C2_14 C3_14 C4_14 0(2) . . . . ?
 C2_14 C1_14 C6_14 C5_14 0(2) . . . . ?
 C2_14 C3_14 C4_14 C5_14 1(2) . . . . ?
 C2_14 C3_14 C4_14 C8_14 -177.1(14) . . . . ?
 C3_14 C4_14 C5_14 C6_14 -1(2) . . . . ?
 C4_14 C5_14 C6_14 C1_14 0(2) . . . . ?
 C6_14 C1_14 C2_14 C3_14 -1(2) . . . . ?
 C6_14 C1_14 C2_14 C7_14 -178.0(13) . . . . ?
 C7_14 C2_14 C3_14 C4_14 177.5(14) . . . . ?
 C8_14 C4_14 C5_14 C6_14 177.2(14) . . . . ?
 S1_15 C1_15 C2_15 C3_15 175.4(11) . . . . ?
 S1_15 C1_15 C2_15 C7_15 -7(2) . . . . ?
 S1_15 C1_15 C6_15 C5_15 -174.3(11) . . . . ?
 C1_15 C2_15 C3_15 C4_15 -2(2) . . . . ?
 C2_15 C1_15 C6_15 C5_15 0(2) . . . . ?
 C2_15 C3_15 C4_15 C5_15 2(2) . . . . ?
 C2_15 C3_15 C4_15 C8_15 -178.0(15) . . . . ?
 C3_15 C4_15 C5_15 C6_15 0(2) . . . . ?
 C4_15 C5_15 C6_15 C1_15 0(2) . . . . ?
 C6_15 C1_15 C2_15 C3_15 2(2) . . . . ?
 C6_15 C1_15 C2_15 C7_15 179.9(15) . . . . ?
 C7_15 C2_15 C3_15 C4_15 179.4(16) . . . . ?
 C8_15 C4_15 C5_15 C6_15 179.4(14) . . . . ?
 S1_16 C1_16 C2_16 C3_16 -173.1(10) . . . . ?
 S1_16 C1_16 C2_16 C7_16 10(2) . . . . ?
 S1_16 C1_16 C6_16 C5_16 173.5(11) . . . . ?
 C1_16 C2_16 C3_16 C4_16 0(2) . . . . ?
 C2_16 C1_16 C6_16 C5_16 1(2) . . . . ?
 C2_16 C3_16 C4_16 C5_16 0(2) . . . . ?
 C2_16 C3_16 C4_16 C8_16 -178.2(14) . . . . ?
 C3_16 C4_16 C5_16 C6_16 0(2) . . . . ?
 C4_16 C5_16 C6_16 C1_16 -1(2) . . . . ?
 C6_16 C1_16 C2_16 C3_16 -1(2) . . . . ?
 C6_16 C1_16 C2_16 C7_16 -178.4(14) . . . . ?
 C7_16 C2_16 C3_16 C4_16 177.8(14) . . . . ?
 C8_16 C4_16 C5_16 C6_16 178.4(14) . . . . ?
 S1_17 C1_17 C2_17 C3_17 -177.1(11) . . . . ?
 S1_17 C1_17 C2_17 C7_17 6(2) . . . . ?
 S1_17 C1_17 C6_17 C5_17 178.5(12) . . . . ?
 C1_17 C2_17 C3_17 C4_17 2(2) . . . . ?
 C2_17 C1_17 C6_17 C5_17 5(2) . . . . ?
 C2_17 C3_17 C4_17 C5_17 -2(2) . . . . ?
 C2_17 C3_17 C4_17 C8_17 -177.9(15) . . . . ?
 C3_17 C4_17 C5_17 C6_17 3(2) . . . . ?
 C4_17 C5_17 C6_17 C1_17 -4(2) . . . . ?
 C6_17 C1_17 C2_17 C3_17 -4(2) . . . . ?
 C6_17 C1_17 C2_17 C7_17 179.0(14) . . . . ?
 C7_17 C2_17 C3_17 C4_17 179.8(15) . . . . ?
 C8_17 C4_17 C5_17 C6_17 178.9(15) . . . . ?
 S1_18 C1_18 C2_18 C3_18 -176.5(11) . . . . ?
 S1_18 C1_18 C2_18 C7_18 6(2) . . . . ?
 S1_18 C1_18 C6_18 C5_18 174.7(13) . . . . ?
 C1_18 C2_18 C3_18 C4_18 2(2) . . . . ?
 C2_18 C1_18 C6_18 C5_18 -1(2) . . . . ?
 C2_18 C3_18 C4_18 C5_18 -1(3) . . . . ?
 C2_18 C3_18 C4_18 C8_18 179.7(16) . . . . ?
 C3_18 C4_18 C5_18 C6_18 -1(3) . . . . ?
 C4_18 C5_18 C6_18 C1_18 2(3) . . . . ?
 C6_18 C1_18 C2_18 C3_18 -1(2) . . . . ?
 C6_18 C1_18 C2_18 C7_18 -178.7(14) . . . . ?
 C7_18 C2_18 C3_18 C4_18 179.5(15) . . . . ?
 C8_18 C4_18 C5_18 C6_18 178.2(17) . . . . ?

_shelx_res_file
;
    cpj01_sq.res created by SHELXL-2014/7

TITL cpj01_a.res in P-1
REM Old TITL CPJ01 in P-1 #2
REM SHELXT solution in P-1
REM R1 0.213, Rweak 0.027, Alpha 0.083, Orientation as input
REM Formula found by SHELXT: C178 S21 Ag25
CELL 0.71073 19.0634 19.5919 26.7981 93.424 90.859 104.756
ZERR 2 0.001 0.001 0.0014 0.002 0.002 0.002
LATT 1
SFAC C H Ag Cl P S
UNIT 350 396 50 4 2 36
RIGU S1_1 S1_2 S1_3 S1_4 S1_5 S1_6 S1_7 S1_8 S1_9 S1_10 S1_11 S1_12 S1_13 =
 S1_14 S1_15 S1_16 S1_17 S1_18 C1_1 C1_2 C1_3 C1_4 C1_5 C1_6 C1_7 C1_8 C1_9 =
 C1_10 C1_11 C1_12 C1_13 C1_14 C1_15 C1_16 C1_17 C1_18 C02X C03G C03L C03R =
 C03T C04B C04H C04J C04V C04X C05A C05C C05E C05I C05J C05K C05N C05O C05Q =
 C05R C05T C05U C05X C2_1 C3_1 C4_1 C5_1 C6_1 C7_1 C2_2 C3_2 C4_2 C5_2 C6_2 =
 C7_2 C2_3 C3_3 C4_3 C5_3 C6_3 C7_3 C2_4 C3_4 C4_4 C5_4 C6_4 C7_4 C2_5 C3_5 =
 C4_5 C5_5 C6_5 C7_5 C2_6 C3_6 C4_6 C5_6 C6_6 C7_6 C2_7 C3_7 C4_7 C5_7 C6_7 =
 C7_7 C2_8 C3_8 C4_8 C5_8 C6_8 C7_8 C2_9 C3_9 C4_9 C5_9 C6_9 C7_9 C2_10 C3_10 =
 C4_10 C5_10 C6_10 C7_10 C2_11 C3_11 C4_11 C5_11 C6_11 C7_11 C2_12 C3_12 =
 C4_12 C5_12 C6_12 C7_12 C2_13 C3_13 C4_13 C5_13 C6_13 C7_13 C2_14 C3_14 =
 C4_14 C5_14 C6_14 C7_14 C2_15 C3_15 C4_15 C5_15 C6_15 C7_15 C2_16 C3_16 =
 C4_16 C5_16 C6_16 C7_16 C2_17 C3_17 C4_17 C5_17 C6_17 C7_17 C2_18 C3_18 =
 C4_18 C5_18 C6_18 C7_18 C8_1
RIGU C065 C05I H05b H05d C060 C0AA H06a H06b C062 H0Aa H0Ab C05R H06f H06g =
 H06C H06D H06E H05F H05G H05H
RIGU C04J P018 C03L C03R C04V C03G C04B C03T C063 C05J C05O C05E C05Q H03G =
 C05C H04B C05T H03T C05A C061 H063 H05J C05U C05K H05O C04X H05E C052 H05Q =
 H05C C05N H05T H05A C05X H061 H05U C H05K C02X H04X H052 H05N H05X H H02X

L.S. 9 0 189
PLAN  10
TEMP -153.15
BOND $H
ABIN
fmap 2.0
acta
MORE -1
CONF
OMIT -3 50
OMIT 1 1 1
OMIT 0 -1 2
OMIT 0 1 2
OMIT -1 2 0
OMIT 0 -1 3
OMIT 0 1 3
OMIT 1 0 3
OMIT 1 0 2
OMIT -1 0 3
OMIT 1 0 4
REM <olex2.extras>
REM <HklSrc "%.\\CPJ01.hkl">
REM </olex2.extras>

WGHT    0.039900  123.187607
FVAR       0.10445
AG01  3    0.697514    0.698978    0.258307    11.00000    0.01758    0.01412 =
         0.01720    0.00388    0.00028    0.00132
AG02  3    0.846049    0.746473    0.267592    11.00000    0.02040    0.02070 =
         0.02597    0.00496    0.00192    0.00338
AG03  3    0.771191    0.625323    0.316333    11.00000    0.02527    0.02106 =
         0.02195    0.00556   -0.00200    0.00416
AG04  3    0.752176    0.843659    0.261166    11.00000    0.02634    0.01626 =
         0.02551    0.00290    0.00058    0.00409
AG05  3    0.757228    0.762385    0.349028    11.00000    0.02299    0.02190 =
         0.02054    0.00228    0.00014    0.00218
AG06  3    0.627211    0.776780    0.200790    11.00000    0.02595    0.02243 =
         0.02108    0.00514   -0.00003    0.00573
AG07  3    0.548484    0.652261    0.251345    11.00000    0.01981    0.02489 =
         0.02483    0.00669   -0.00136    0.00235
AG08  3    0.641807    0.553174    0.252969    11.00000    0.02739    0.01679 =
         0.02540    0.00616    0.00031    0.00176
AG09  3    0.625295    0.642919    0.340610    11.00000    0.02553    0.02450 =
         0.02222    0.00849    0.00220    0.00178
AG0A  3    0.765288    0.756772    0.174872    11.00000    0.02492    0.02025 =
         0.02272    0.00630    0.00295    0.00086
AG0B  3    0.641213    0.632494    0.167678    11.00000    0.02758    0.02038 =
         0.01996    0.00391   -0.00183    0.00109
AG0C  3    0.615626    0.776136    0.311121    11.00000    0.02560    0.02400 =
         0.02322    0.00332    0.00172    0.00528
AG0D  3    0.774407    0.615368    0.207236    11.00000    0.02630    0.02188 =
         0.02122    0.00309    0.00114    0.00497
AG0E  3    0.659364    0.781635    0.425637    11.00000    0.03118    0.03332 =
         0.02735    0.00770    0.00398    0.00930
AG0F  3    0.915131    0.868748    0.213365    11.00000    0.03428    0.02790 =
         0.03370    0.00718    0.00217    0.00160
AG0G  3    0.502632    0.495111    0.301437    11.00000    0.03337    0.03431 =
         0.02789    0.00803   -0.00090   -0.00390
AG0H  3    0.635704    0.730773    0.089309    11.00000    0.04169    0.03423 =
         0.02440    0.00764    0.00206    0.01182
AG0I  3    0.919466    0.626933    0.251249    11.00000    0.03530    0.02429 =
         0.04754    0.00373    0.00049    0.00837
AG0J  3    0.863741    0.908343    0.337362    11.00000    0.03339    0.03428 =
         0.03379    0.00590    0.00176   -0.00235
AG0K  3    0.481722    0.532099    0.185707    11.00000    0.03928    0.03400 =
         0.02892    0.00873   -0.00151   -0.00719
AG0L  3    0.778862    0.650201    0.098839    11.00000    0.04307    0.04046 =
         0.02829    0.00316   -0.00110    0.01508
AG0M  3    0.478797    0.775401    0.231045    11.00000    0.03287    0.03245 =
         0.03933    0.00482    0.00149    0.00921
AG0N  3    0.623838    0.913751    0.274952    11.00000    0.02954    0.03106 =
         0.05081    0.00481   -0.00051    0.00900
AG0O  3    0.774257    0.483195    0.273022    11.00000    0.03858    0.02632 =
         0.04258    0.00838    0.00059    0.00696
AG0P  3    0.713408    0.616720    0.422369    11.00000    0.04161    0.04305 =
         0.02519    0.00815    0.00159    0.01303
P018  5    0.339520    0.133008    0.233345    11.00000    0.03810    0.04804 =
         0.06451    0.02743    0.01735    0.01295
CL01  4    0.806732    1.086860    0.423782    11.00000    0.08688    0.06037 =
         0.10514    0.00543   -0.03341    0.00416
CL0A  4    0.650803    1.064249    0.431101    11.00000    0.10416    0.06481 =
         0.17669    0.00524    0.05435    0.01911
C02X  1    0.158297   -0.030986    0.298582    11.00000    0.04404    0.04708 =
         0.05494    0.01741    0.00584    0.00079
AFIX  43
H02X  2    0.120087   -0.064850    0.312548    11.00000   -1.20000
AFIX   0
C03G  1    0.346997    0.241244    0.171202    11.00000    0.06688    0.02966 =
         0.03745   -0.00643    0.00850    0.01392
AFIX  43
H03G  2    0.395834    0.239489    0.166587    11.00000   -1.20000
AFIX   0
C03L  1    0.301394    0.195291    0.202355    11.00000    0.05007    0.03787 =
         0.04920    0.00672    0.00252    0.01511
C03R  1    0.400951    0.177090    0.282142    11.00000    0.03388    0.05512 =
         0.06753    0.03356    0.01688    0.00504
C03T  1    0.432460    0.249198    0.284590    11.00000    0.03792    0.05499 =
         0.07555    0.03006    0.01215    0.00458
AFIX  43
H03T  2    0.420527    0.276185    0.258973    11.00000   -1.20000
AFIX   0
C04B  1    0.230940    0.198850    0.209885    11.00000    0.04981    0.04325 =
         0.06468   -0.00356    0.00007    0.01716
AFIX  43
H04B  2    0.200961    0.167391    0.231120    11.00000   -1.20000
AFIX   0

C04H  1    0.721695    1.024570    0.422239    11.00000    0.05986    0.04896 =
         0.08172    0.01240   -0.01058    0.00861
AFIX  23
H04A  2    0.714252    0.996970    0.389559    11.00000   -1.20000
H04C  2    0.721388    0.991281    0.448661    11.00000   -1.20000
AFIX   0

C04J  1    0.381484    0.089071    0.184642    11.00000    0.06072    0.04342 =
         0.08462    0.03464    0.03466    0.02284
C04V  1    0.271021    0.067425    0.259462    11.00000    0.04767    0.05535 =
         0.05743    0.02634    0.01309    0.01012
C04X  1    0.180972    0.033111    0.321882    11.00000    0.08510    0.05726 =
         0.07113    0.00141    0.04171   -0.02172
AFIX  43
H04X  2    0.159012    0.044536    0.351753    11.00000   -1.20000
AFIX   0
C052  1    0.187514   -0.049817    0.255795    11.00000    0.06452    0.04951 =
         0.06347    0.02011    0.01821    0.00687
AFIX  43
H052  2    0.170445   -0.095821    0.239786    11.00000   -1.20000
AFIX   0
C05A  1    0.479537    0.282962    0.321882    11.00000    0.04962    0.05550 =
         0.08302    0.03072    0.00504   -0.00471
AFIX  43
H05A  2    0.500998    0.332404    0.322302    11.00000   -1.20000
AFIX   0
C05C  1    0.318130    0.288843    0.147666    11.00000    0.09046    0.02938 =
         0.04685   -0.01181   -0.01203    0.01847
AFIX  43
H05C  2    0.347226    0.319679    0.125647    11.00000   -1.20000
AFIX   0
C05E  1    0.237458    0.083409    0.301896    11.00000    0.08573    0.05796 =
         0.08224    0.00341    0.04418   -0.02091
AFIX  43
H05E  2    0.252861    0.129494    0.318012    11.00000   -1.20000
AFIX   0

C05I  1    0.898398    0.384963    0.383285    11.00000    0.09442    0.10775 =
         0.05865    0.03075    0.01876    0.02435
AFIX  23
H05B  2    0.880647    0.422424    0.367964    11.00000   -1.20000
H05D  2    0.905011    0.397889    0.419647    11.00000   -1.20000
AFIX   0

C05J  1    0.347820    0.076216    0.138021    11.00000    0.07004    0.05819 =
         0.08756    0.02378    0.03252    0.03507
AFIX  43
H05J  2    0.306330    0.093185    0.131592    11.00000   -1.20000
AFIX   0
C05K  1    0.468609    0.027558    0.156787    11.00000    0.07751    0.07366 =
         0.11334    0.06197    0.05710    0.04370
AFIX  43
H05K  2    0.511155    0.011664    0.161703    11.00000   -1.20000
AFIX   0
C05N  1    0.245188    0.292921    0.155632    11.00000    0.08773    0.04126 =
         0.07275   -0.01101   -0.01380    0.02453
AFIX  43
H05N  2    0.225721    0.326326    0.139627    11.00000   -1.20000
AFIX   0
C05O  1    0.442048    0.066222    0.198573    11.00000    0.06855    0.08139 =
         0.11152    0.06375    0.04961    0.03977
AFIX  43
H05O  2    0.463862    0.074517    0.231221    11.00000   -1.20000
AFIX   0
C05Q  1    0.243626    0.000876    0.236099    11.00000    0.06379    0.05272 =
         0.06668    0.02534    0.01940    0.01306
AFIX  43
H05Q  2    0.263731   -0.010783    0.205514    11.00000   -1.20000
AFIX   0

C05R  1    0.713497    0.246208    0.399648    11.00000    0.07288    0.09631 =
         0.06102   -0.00615    0.01257    0.01553
AFIX 137
H05F  2    0.703319    0.229670    0.364408    11.00000   -1.50000
H05G  2    0.670084    0.256489    0.414086    11.00000   -1.50000
H05H  2    0.727115    0.209436    0.417942    11.00000   -1.50000
AFIX   0

C05T  1    0.204598    0.247350    0.186907    11.00000    0.07548    0.04095 =
         0.07672   -0.01073   -0.01613    0.02464
AFIX  43
H05T  2    0.156209    0.249627    0.192816    11.00000   -1.20000
AFIX   0
C05U  1    0.374173    0.038408    0.100067    11.00000    0.09088    0.05511 =
         0.09740    0.02514    0.04400    0.03964
AFIX  43
H05U  2    0.351949    0.029702    0.067545    11.00000   -1.20000
AFIX   0
C05X  1    0.495388    0.243018    0.359426    11.00000    0.08220    0.07068 =
         0.11378    0.04985   -0.02237   -0.02034
AFIX  43
H05X  2    0.526797    0.265579    0.386725    11.00000   -1.20000
AFIX   0

C060  1    0.838859    0.315897    0.375861    11.00000    0.08852    0.09067 =
         0.11472    0.00956    0.03228    0.02626
AFIX  23
H06A  2    0.825093    0.308004    0.339808    11.00000   -1.20000
H06B  2    0.859822    0.276792    0.384869    11.00000   -1.20000
AFIX   0

C061  1    0.465821    0.170353    0.357543    11.00000    0.12476    0.06898 =
         0.13688    0.06011   -0.06479   -0.03404
AFIX  43
H061  2    0.477741    0.143511    0.383257    11.00000   -1.20000
AFIX   0

C062  1    1.023898    0.449212    0.375956    11.00000    0.07884    0.14304 =
         0.07168    0.00229    0.03242    0.01190
AFIX 137
H06C  2    1.031050    0.478660    0.347225    11.00000   -1.50000
H06D  2    1.069074    0.436517    0.384037    11.00000   -1.50000
H06E  2    1.010195    0.475579    0.404818    11.00000   -1.50000
AFIX   0

C063  1    0.419308    0.136963    0.318608    11.00000    0.10006    0.06815 =
         0.12413    0.05561   -0.04709   -0.02213
AFIX  43
H063  2    0.400096    0.087097    0.316806    11.00000   -1.20000
AFIX   0

C065  1    0.773483    0.310778    0.403413    11.00000    0.08128    0.10442 =
         0.08299    0.00359    0.01336    0.01012
AFIX  23
H06F  2    0.753120    0.350021    0.393849    11.00000   -1.20000
H06G  2    0.788362    0.320447    0.439225    11.00000   -1.20000
AFIX   0

C     1    0.433184    0.014566    0.111766    11.00000    0.09414    0.07898 =
         0.11452    0.05748    0.05547    0.04829
AFIX  43
H     2    0.450509   -0.012891    0.086733    11.00000   -1.20000
AFIX   0

C0AA  1    0.967452    0.386198    0.363954    11.00000    0.09909    0.15000 =
         0.10843    0.01042    0.03182    0.01339
AFIX  23
H0AA  2    0.962078    0.378788    0.327083    11.00000   -1.20000
H0AB  2    0.983183    0.345685    0.376353    11.00000   -1.20000
AFIX   0

RESI SPhD 1
S1    6    0.503551    0.902247    0.242532    11.00000    0.03502    0.03182 =
         0.03228    0.00677    0.00200    0.01138
C1    1    0.458368    0.925436    0.295719    11.00000    0.02625    0.02321 =
         0.03155    0.00834   -0.00241    0.00918
C2    1    0.381454    0.904139    0.295438    11.00000    0.02401    0.03705 =
         0.05039   -0.00121   -0.00167    0.00606
C3    1    0.347000    0.925384    0.337150    11.00000    0.03145    0.04454 =
         0.05016    0.00130    0.00323    0.00940
AFIX  43
H3    2    0.295558    0.910688    0.337925    11.00000   -1.20000
AFIX   0
C4    1    0.384082    0.966039    0.376424    11.00000    0.04339    0.02724 =
         0.04521    0.00497   -0.00277    0.01264
C5    1    0.457214    0.988059    0.375811    11.00000    0.04399    0.05699 =
         0.04414   -0.00824   -0.00433    0.01057
AFIX  43
H5    2    0.483684    1.016381    0.403297    11.00000   -1.20000
AFIX   0
C6    1    0.492978    0.969388    0.335432    11.00000    0.03793    0.03371 =
         0.04166   -0.00004   -0.00500    0.00771
AFIX  43
H6    2    0.544125    0.987652    0.334808    11.00000   -1.20000
AFIX   0
C7    1    0.335721    0.854816    0.254338    11.00000    0.02997    0.09321 =
         0.08820   -0.04252   -0.01292    0.00809
AFIX 137
H7A   2    0.344068    0.876688    0.222278    11.00000   -1.50000
H7B   2    0.284252    0.846217    0.262096    11.00000   -1.50000
H7C   2    0.349430    0.809823    0.252206    11.00000   -1.50000
AFIX   0
C8    1    0.343839    0.984873    0.422606    11.00000    0.07040    0.05974 =
         0.06293   -0.00199    0.01833    0.01535
AFIX 137
H8A   2    0.294691    0.986356    0.412415    11.00000   -1.50000
H8B   2    0.370173    1.031245    0.437793    11.00000   -1.50000
H8C   2    0.341059    0.948998    0.446980    11.00000   -1.50000
AFIX   0

RESI SPhD 2
S1    6    0.974387    0.751532    0.247469    11.00000    0.02484    0.02874 =
         0.03090    0.00749   -0.00016    0.00619
C1    1    1.024878    0.779208    0.305134    11.00000    0.03084    0.01988 =
         0.03033    0.00511   -0.00172    0.00553
C2    1    1.097547    0.774567    0.308651    11.00000    0.02937    0.02148 =
         0.03938    0.00440   -0.00157    0.00413
C3    1    1.137395    0.801633    0.351494    11.00000    0.02885    0.02739 =
         0.04249    0.00868   -0.00231    0.00054
AFIX  43
H3    2    1.186343    0.798796    0.353715    11.00000   -1.20000
AFIX   0
C4    1    1.110104    0.832749    0.391509    11.00000    0.04078    0.02941 =
         0.03497    0.01131   -0.00450    0.00840
C5    1    1.038993    0.836412    0.387408    11.00000    0.04062    0.02123 =
         0.03007    0.00541   -0.00157    0.00908
AFIX  43
H5    2    1.018326    0.857410    0.414380    11.00000   -1.20000
AFIX   0
C6    1    0.997495    0.809951    0.344605    11.00000    0.03263    0.01939 =
         0.03154    0.00686    0.00222    0.00838
AFIX  43
H6    2    0.948682    0.813251    0.342617    11.00000   -1.20000
AFIX   0
C7    1    1.130199    0.738687    0.267096    11.00000    0.02896    0.04922 =
         0.04465   -0.00265   -0.00778    0.01785
AFIX 137
H7A   2    1.101285    0.689736    0.260850    11.00000   -1.50000
H7B   2    1.180049    0.738964    0.276791    11.00000   -1.50000
H7C   2    1.130494    0.764034    0.236629    11.00000   -1.50000
AFIX   0
C8    1    1.155164    0.863758    0.438417    11.00000    0.04239    0.04758 =
         0.06745    0.00992   -0.00091    0.00741
AFIX 137
H8A   2    1.140061    0.832629    0.465721    11.00000   -1.50000
H8B   2    1.147985    0.910590    0.447722    11.00000   -1.50000
H8C   2    1.206579    0.868104    0.432136    11.00000   -1.50000
AFIX   0

RESI SPhD 3
S1    6    0.554449    0.794689    0.126947    11.00000    0.02626    0.02140 =
         0.03221    0.00858   -0.00087    0.00317
C1    1    0.585717    0.883020    0.110204    11.00000    0.02227    0.02359 =
         0.03725    0.01059    0.00258    0.00413
C2    1    0.563411    0.903241    0.064408    11.00000    0.02741    0.02566 =
         0.03723    0.00901    0.00387    0.00730
C3    1    0.587547    0.974214    0.053871    11.00000    0.02713    0.02687 =
         0.03423    0.01295    0.00562    0.00951
AFIX  43
H3    2    0.572085    0.987884    0.022997    11.00000   -1.20000
AFIX   0
C4    1    0.632285    1.025592    0.085349    11.00000    0.03136    0.02969 =
         0.04562    0.00608    0.00445    0.00860
C5    1    0.652520    1.005063    0.130201    11.00000    0.03193    0.02858 =
         0.04363    0.00644   -0.00057   -0.00195
AFIX  43
H5    2    0.681967    1.039375    0.153452    11.00000   -1.20000
AFIX   0
C6    1    0.630780    0.935122    0.142235    11.00000    0.02456    0.02928 =
         0.03790    0.00611    0.00565    0.00233
AFIX  43
H6    2    0.647036    0.922336    0.173166    11.00000   -1.20000
AFIX   0
C7    1    0.512387    0.852189    0.028284    11.00000    0.04511    0.03106 =
         0.03472    0.01134   -0.00290    0.00372
AFIX 137
H7A   2    0.533258    0.812689    0.018611    11.00000   -1.50000
H7B   2    0.504632    0.876321   -0.001519    11.00000   -1.50000
H7C   2    0.465891    0.834161    0.044128    11.00000   -1.50000
AFIX   0
C8    1    0.656305    1.101589    0.071774    11.00000    0.07075    0.01450 =
         0.08120    0.02257   -0.00338    0.00450
AFIX 137
H8A   2    0.663932    1.102951    0.035725    11.00000   -1.50000
H8B   2    0.701751    1.125223    0.090038    11.00000   -1.50000
H8C   2    0.618816    1.125903    0.080750    11.00000   -1.50000
AFIX   0

RESI SPhD 4
S1    6    0.565690    0.534277    0.380806    11.00000    0.02605    0.02504 =
         0.02642    0.00843    0.00035   -0.00346
C1    1    0.498940    0.553334    0.420695    11.00000    0.02178    0.02835 =
         0.01983    0.00715   -0.00406    0.00200
C2    1    0.450741    0.498907    0.443084    11.00000    0.02343    0.03009 =
         0.01985    0.00829   -0.00310    0.00308
C3    1    0.404087    0.517913    0.477343    11.00000    0.02647    0.03222 =
         0.02836    0.00901    0.00565    0.00061
AFIX  43
H3    2    0.372180    0.481210    0.493719    11.00000   -1.20000
AFIX   0
C4    1    0.400974    0.585428    0.489034    11.00000    0.02828    0.03869 =
         0.03922    0.00684   -0.00189    0.00626
C5    1    0.446868    0.638730    0.465742    11.00000    0.02763    0.03740 =
         0.04154    0.00679   -0.00159    0.01150
AFIX  43
H5    2    0.445415    0.686367    0.473161    11.00000   -1.20000
AFIX   0
C6    1    0.495631    0.623674    0.431284    11.00000    0.02464    0.02655 =
         0.03633    0.00628   -0.00270    0.00101
AFIX  43
H6    2    0.526725    0.660911    0.414887    11.00000   -1.20000
AFIX   0
C7    1    0.452412    0.424341    0.433399    11.00000    0.03398    0.02998 =
         0.03591    0.00887    0.00264    0.00492
AFIX 137
H7A   2    0.460498    0.415385    0.397848    11.00000   -1.50000
H7B   2    0.406023    0.393271    0.442396    11.00000   -1.50000
H7C   2    0.491822    0.414886    0.453528    11.00000   -1.50000
AFIX   0
C8    1    0.348902    0.602824    0.526194    11.00000    0.02092    0.06379 =
         0.06424    0.00205    0.00980    0.00334
AFIX 137
H8A   2    0.303617    0.603674    0.508742    11.00000   -1.50000
H8B   2    0.370399    0.649297    0.543248    11.00000   -1.50000
H8C   2    0.338705    0.566856    0.550844    11.00000   -1.50000
AFIX   0

RESI SPhD 5
S1    6    0.786702    0.546444    0.382414    11.00000    0.03006    0.02698 =
         0.03056    0.00890   -0.00775    0.00447
C1    1    0.876579    0.580421    0.408751    11.00000    0.02852    0.02135 =
         0.02690    0.00658   -0.00054    0.00565
C2    1    0.894358    0.555872    0.454037    11.00000    0.03725    0.03029 =
         0.02692    0.00945   -0.00684    0.00351
C3    1    0.966245    0.581435    0.471435    11.00000    0.03589    0.02164 =
         0.02856    0.01228   -0.00775    0.00188
AFIX  43
H3    2    0.979581    0.566670    0.502527    11.00000   -1.20000
AFIX   0
C4    1    1.019110    0.626964    0.446048    11.00000    0.03634    0.02314 =
         0.03628    0.00980   -0.00001    0.00788
C5    1    0.998903    0.648546    0.400667    11.00000    0.03431    0.02676 =
         0.03529    0.00853    0.00342    0.00828
AFIX  43
H5    2    1.033852    0.678857    0.381601    11.00000   -1.20000
AFIX   0
C6    1    0.928823    0.625878    0.383929    11.00000    0.03653    0.02584 =
         0.03001    0.00624    0.00147    0.00616
AFIX  43
H6    2    0.915425    0.642396    0.353495    11.00000   -1.20000
AFIX   0
C7    1    0.841333    0.508170    0.483422    11.00000    0.03395    0.03609 =
         0.02408    0.00992   -0.01148    0.00031
AFIX 137
H7A   2    0.797130    0.524857    0.485775    11.00000   -1.50000
H7B   2    0.861844    0.507377    0.517070    11.00000   -1.50000
H7C   2    0.829551    0.460363    0.467079    11.00000   -1.50000
AFIX   0
C8    1    1.095767    0.652530    0.466725    11.00000    0.03914    0.04670 =
         0.06929    0.01765   -0.00839    0.00780
AFIX 137
H8A   2    1.095521    0.655004    0.503353    11.00000   -1.50000
H8B   2    1.117789    0.699615    0.455343    11.00000   -1.50000
H8C   2    1.123928    0.619628    0.454949    11.00000   -1.50000
AFIX   0

RESI SPhD 6
S1    6    0.876338    0.810567    0.131105    11.00000    0.03110    0.02599 =
         0.02893    0.00868    0.00910    0.00522
C1    1    0.856828    0.876511    0.093975    11.00000    0.03634    0.02360 =
         0.02315    0.00055    0.00849    0.00243
C2    1    0.914691    0.917499    0.068898    11.00000    0.03918    0.03246 =
         0.02803    0.00557    0.01035    0.00427
C3    1    0.899102    0.967928    0.037587    11.00000    0.04529    0.04428 =
         0.03398    0.01534    0.01479    0.00839
AFIX  43
H3    2    0.937574    0.996040    0.019872    11.00000   -1.20000
AFIX   0
C4    1    0.829300    0.978106    0.031636    11.00000    0.04870    0.02739 =
         0.03956    0.01192    0.01268    0.00965
C5    1    0.775429    0.936602    0.057287    11.00000    0.04329    0.02988 =
         0.03061    0.00638    0.00859    0.00781
AFIX  43
H5    2    0.727591    0.942219    0.053752    11.00000   -1.20000
AFIX   0
C6    1    0.787537    0.886625    0.088263    11.00000    0.03632    0.02887 =
         0.03470    0.00877    0.00945    0.00351
AFIX  43
H6    2    0.748435    0.859044    0.105739    11.00000   -1.20000
AFIX   0
C7    1    0.990154    0.909334    0.071087    11.00000    0.03867    0.05123 =
         0.04258    0.02507    0.01765    0.01269
AFIX 137
H7A   2    1.011024    0.923247    0.104949    11.00000   -1.50000
H7B   2    1.019582    0.939528    0.047227    11.00000   -1.50000
H7C   2    0.989553    0.859848    0.062528    11.00000   -1.50000
AFIX   0
C8    1    0.814757    1.029709   -0.002805    11.00000    0.07183    0.06238 =
         0.05504    0.02352   -0.00135    0.02796
AFIX 137
H8A   2    0.849191    1.075808    0.004837    11.00000   -1.50000
H8B   2    0.765133    1.034258    0.001382    11.00000   -1.50000
H8C   2    0.820334    1.013176   -0.037401    11.00000   -1.50000
AFIX   0

RESI SPhD 7
S1    6    0.751542    0.965841    0.291355    11.00000    0.03499    0.02005 =
         0.03033    0.00359   -0.00215    0.00575
C1    1    0.780799    1.020206    0.240414    11.00000    0.02030    0.02334 =
         0.03479    0.00233   -0.00635   -0.00425
C2    1    0.770445    1.089549    0.244389    11.00000    0.05287    0.02628 =
         0.04040    0.00346   -0.00584    0.00989
C3    1    0.797231    1.132049    0.205717    11.00000    0.04539    0.02967 =
         0.04083    0.00540   -0.01011    0.01347
AFIX  43
H3    2    0.790280    1.178429    0.206711    11.00000   -1.20000
AFIX   0
C4    1    0.833696    1.110383    0.165600    11.00000    0.04023    0.03077 =
         0.03744    0.00436   -0.01210    0.00417
C5    1    0.842906    1.041497    0.163748    11.00000    0.03797    0.03127 =
         0.03761    0.00776    0.00263    0.00547
AFIX  43
H5    2    0.867719    1.024930    0.137027    11.00000   -1.20000
AFIX   0
C6    1    0.815574    0.998582    0.201046    11.00000    0.03441    0.02772 =
         0.03712    0.00799    0.00169    0.00806
AFIX  43
H6    2    0.821158    0.951687    0.199332    11.00000   -1.20000
AFIX   0
C7    1    0.734200    1.116246    0.287251    11.00000    0.08214    0.03740 =
         0.04645    0.01024    0.00462    0.03606
AFIX 137
H7A   2    0.685692    1.084791    0.290417    11.00000   -1.50000
H7B   2    0.729999    1.164013    0.281555    11.00000   -1.50000
H7C   2    0.762997    1.117547    0.318059    11.00000   -1.50000
AFIX   0
C8    1    0.864113    1.159024    0.125755    11.00000    0.06237    0.02816 =
         0.07247    0.01955   -0.00795   -0.00419
AFIX 137
H8A   2    0.832931    1.190942    0.120628    11.00000   -1.50000
H8B   2    0.866218    1.131129    0.094476    11.00000   -1.50000
H8C   2    0.913092    1.186830    0.136091    11.00000   -1.50000
AFIX   0

RESI SPhD 8
S1    6    0.595038    0.854863    0.382047    11.00000    0.02398    0.02453 =
         0.03327    0.00441    0.00494    0.00542
C1    1    0.503514    0.824730    0.400236    11.00000    0.03053    0.02292 =
         0.03752    0.01118    0.00555    0.01241
C2    1    0.482607    0.844434    0.446827    11.00000    0.03020    0.03884 =
         0.03906    0.00622    0.00864    0.01717
C3    1    0.410462    0.818540    0.459589    11.00000    0.02897    0.03232 =
         0.03828    0.00895    0.00878    0.01842
AFIX  43
H3    2    0.396350    0.831439    0.491923    11.00000   -1.20000
AFIX   0
C4    1    0.357955    0.774459    0.426964    11.00000    0.02783    0.02768 =
         0.04353    0.01349    0.00168    0.01828
C5    1    0.379405    0.756744    0.380441    11.00000    0.02905    0.04325 =
         0.04456    0.00631    0.00055    0.00985
AFIX  43
H5    2    0.345051    0.727823    0.356941    11.00000   -1.20000
AFIX   0
C6    1    0.451339    0.781084    0.367688    11.00000    0.03175    0.03336 =
         0.03777    0.00419    0.00305    0.01384
AFIX  43
H6    2    0.465458    0.767424    0.335537    11.00000   -1.20000
AFIX   0
C7    1    0.534731    0.892282    0.482522    11.00000    0.04141    0.07325 =
         0.04828   -0.00847    0.00809    0.00787
AFIX 137
H7A   2    0.573351    0.869976    0.491379    11.00000   -1.50000
H7B   2    0.509619    0.901918    0.512750    11.00000   -1.50000
H7C   2    0.555892    0.936777    0.467178    11.00000   -1.50000
AFIX   0
C8    1    0.282123    0.743830    0.443187    11.00000    0.03412    0.05883 =
         0.05695    0.02617    0.00913    0.00571
AFIX 137
H8A   2    0.279572    0.699000    0.458350    11.00000   -1.50000
H8B   2    0.248567    0.735443    0.414090    11.00000   -1.50000
H8C   2    0.268653    0.777025    0.467727    11.00000   -1.50000
AFIX   0

RESI SPhD 9
S1    6    0.966461    0.945315    0.285865    11.00000    0.03279    0.02975 =
         0.03527    0.00686    0.00881    0.00633
C1    1    0.971158    1.035509    0.274549    11.00000    0.03368    0.02707 =
         0.02750    0.00076   -0.02065   -0.00165
C2    1    1.009433    1.064214    0.233967    11.00000    0.03475    0.04166 =
         0.03581    0.00973   -0.01625    0.00037
C3    1    1.011718    1.134646    0.226773    11.00000    0.06390    0.04109 =
         0.04505    0.00798   -0.01888    0.00318
AFIX  43
H3    2    1.037384    1.156307    0.199333    11.00000   -1.20000
AFIX   0
C4    1    0.977651    1.174365    0.258446    11.00000    0.05518    0.04158 =
         0.05269    0.00070   -0.02730    0.00324
C5    1    0.942299    1.144474    0.298090    11.00000    0.05821    0.03676 =
         0.05503   -0.00363   -0.02265    0.01053
AFIX  43
H5    2    0.919395    1.171542    0.319914    11.00000   -1.20000
AFIX   0
C6    1    0.938918    1.076030    0.307333    11.00000    0.03648    0.03884 =
         0.04087   -0.00393   -0.02052    0.00778
AFIX  43
H6    2    0.914850    1.055970    0.335826    11.00000   -1.20000
AFIX   0
C7    1    1.044198    1.024068    0.196926    11.00000    0.09201    0.05065 =
         0.05446    0.01927    0.01975    0.01260
AFIX 137
H7A   2    1.069442    0.994493    0.214627    11.00000   -1.50000
H7B   2    1.079111    1.057404    0.177820    11.00000   -1.50000
H7C   2    1.006831    0.993993    0.174049    11.00000   -1.50000
AFIX   0
C8    1    0.979064    1.251507    0.249217    11.00000    0.16874    0.04191 =
         0.10095   -0.00084   -0.06618    0.03693
AFIX 137
H8A   2    1.022525    1.272699    0.230923    11.00000   -1.50000
H8B   2    0.979879    1.278369    0.281359    11.00000   -1.50000
H8C   2    0.935688    1.252559    0.229495    11.00000   -1.50000
AFIX   0

RESI SPhD 10
S1    6    0.857522    0.593062    0.141413    11.00000    0.03029    0.02731 =
         0.02769    0.00141    0.00190    0.00755
C1    1    0.824456    0.504593    0.115352    11.00000    0.03145    0.03219 =
         0.03119    0.00961   -0.00540    0.01516
C2    1    0.853217    0.482860    0.071682    11.00000    0.03365    0.03803 =
         0.03333    0.00560   -0.00057    0.01294
C3    1    0.828214    0.412331    0.053709    11.00000    0.05045    0.03646 =
         0.03097    0.00695   -0.00027    0.01378
AFIX  43
H3    2    0.848335    0.397091    0.024161    11.00000   -1.20000
AFIX   0
C4    1    0.775772    0.363910    0.076841    11.00000    0.04106    0.04020 =
         0.04653    0.01180   -0.00465    0.01215
C5    1    0.746131    0.387318    0.118474    11.00000    0.05159    0.03892 =
         0.04470    0.01108   -0.00110    0.01090
AFIX  43
H5    2    0.708838    0.355296    0.134691    11.00000   -1.20000
AFIX   0
C6    1    0.769621    0.457365    0.137604    11.00000    0.03341    0.03936 =
         0.03432    0.01051   -0.00064    0.01446
AFIX  43
H6    2    0.747592    0.472673    0.166265    11.00000   -1.20000
AFIX   0
C7    1    0.911693    0.532001    0.046256    11.00000    0.06605    0.03965 =
         0.06096    0.00178    0.02889    0.00940
AFIX 137
H7A   2    0.893361    0.570563    0.034054    11.00000   -1.50000
H7B   2    0.927850    0.506436    0.017974    11.00000   -1.50000
H7C   2    0.952607    0.551560    0.069895    11.00000   -1.50000
AFIX   0
C8    1    0.749640    0.288155    0.055617    11.00000    0.09225    0.02881 =
         0.06912   -0.01014   -0.02388    0.00943
AFIX 137
H8A   2    0.749861    0.286961    0.019009    11.00000   -1.50000
H8B   2    0.700211    0.267883    0.066402    11.00000   -1.50000
H8C   2    0.781919    0.260547    0.067691    11.00000   -1.50000
AFIX   0

RESI SPhD 11
S1    6    0.799001    0.866575    0.411166    11.00000    0.02217    0.02919 =
         0.02600    0.00537   -0.00064    0.00299
C1    1    0.862867    0.844343    0.452632    11.00000    0.02439    0.03032 =
         0.01834    0.00446    0.00624    0.00607
C2    1    0.901016    0.893673    0.488532    11.00000    0.04680    0.03793 =
         0.03589   -0.00640   -0.00750    0.00989
C3    1    0.948773    0.874705    0.520274    11.00000    0.04465    0.04146 =
         0.03294   -0.00024   -0.00655    0.00305
AFIX  43
H3    2    0.975350    0.909155    0.544660    11.00000   -1.20000
AFIX   0
C4    1    0.959910    0.807917    0.518363    11.00000    0.03065    0.04300 =
         0.02761    0.01266    0.01048    0.00400
C5    1    0.920125    0.758174    0.482220    11.00000    0.03955    0.03568 =
         0.03446    0.01144    0.00284    0.01043
AFIX  43
H5    2    0.924772    0.710957    0.480446    11.00000   -1.20000
AFIX   0
C6    1    0.875077    0.777646    0.449867    11.00000    0.03894    0.03573 =
         0.03256    0.00178   -0.00406    0.01216
AFIX  43
H6    2    0.850744    0.744166    0.424130    11.00000   -1.20000
AFIX   0
C7    1    0.890567    0.968298    0.494435    11.00000    0.06011    0.04201 =
         0.05631   -0.01392   -0.02058    0.01570
AFIX 137
H7A   2    0.901928    0.991533    0.463095    11.00000   -1.50000
H7B   2    0.922965    0.995427    0.521421    11.00000   -1.50000
H7C   2    0.840090    0.965906    0.502585    11.00000   -1.50000
AFIX   0
C8    1    1.012315    0.787119    0.554183    11.00000    0.04340    0.07742 =
         0.06070    0.03265   -0.00909    0.02041
AFIX 137
H8A   2    1.059208    0.791838    0.538403    11.00000   -1.50000
H8B   2    0.992616    0.737951    0.562363    11.00000   -1.50000
H8C   2    1.018905    0.818160    0.584877    11.00000   -1.50000
AFIX   0

RESI SPhD 12
S1    6    0.644818    0.434516    0.278262    11.00000    0.03759    0.02325 =
         0.03264    0.00654   -0.00459    0.00367
C1    1    0.612657    0.372895    0.225732    11.00000    0.03186    0.01886 =
         0.03179    0.00837   -0.00452    0.00087
C2    1    0.617624    0.304182    0.227529    11.00000    0.03043    0.01957 =
         0.04287    0.01316    0.00216    0.00342
C3    1    0.586490    0.256288    0.187540    11.00000    0.03954    0.02299 =
         0.04287    0.01213    0.00110   -0.00090
AFIX  43
H3    2    0.587710    0.208277    0.189021    11.00000   -1.20000
AFIX   0
C4    1    0.554000    0.275470    0.145931    11.00000    0.03515    0.03181 =
         0.03875    0.00867    0.00532    0.00298
C5    1    0.553251    0.347514    0.145261    11.00000    0.04485    0.03088 =
         0.03186    0.01151   -0.00652    0.00895
AFIX  43
H5    2    0.532879    0.363275    0.116938    11.00000   -1.20000
AFIX   0
C6    1    0.581230    0.394724    0.184518    11.00000    0.03471    0.03039 =
         0.03226    0.01421   -0.00368    0.00131
AFIX  43
H6    2    0.579206    0.442591    0.183652    11.00000   -1.20000
AFIX   0
C7    1    0.651344    0.278944    0.271212    11.00000    0.05195    0.02860 =
         0.05203    0.00929   -0.00637    0.01334
AFIX 137
H7A   2    0.704137    0.297949    0.271325    11.00000   -1.50000
H7B   2    0.639552    0.227138    0.268654    11.00000   -1.50000
H7C   2    0.632440    0.295205    0.302281    11.00000   -1.50000
AFIX   0
C8    1    0.523823    0.222514    0.102792    11.00000    0.05434    0.02901 =
         0.05396   -0.00824   -0.00292    0.00224
AFIX 137
H8A   2    0.553628    0.234424    0.073517    11.00000   -1.50000
H8B   2    0.473834    0.223712    0.094805    11.00000   -1.50000
H8C   2    0.524409    0.175010    0.112033    11.00000   -1.50000
AFIX   0

RESI SPhD 13
S1    6    0.536114    0.582648    0.110899    11.00000    0.03603    0.02643 =
         0.02229    0.00926   -0.00389   -0.00157
C1    1    0.550888    0.506850    0.075457    11.00000    0.05300    0.02628 =
         0.02360    0.01185   -0.00464    0.00224
C2    1    0.489457    0.456914    0.053393    11.00000    0.05833    0.02224 =
         0.03078    0.01697   -0.01513   -0.00719
C3    1    0.504010    0.402243    0.023701    11.00000    0.08771    0.02842 =
         0.03891    0.01271   -0.01340    0.00287
AFIX  43
H3    2    0.463611    0.367551    0.009003    11.00000   -1.20000
AFIX   0
C4    1    0.571333    0.393874    0.013721    11.00000    0.08942    0.01777 =
         0.04128    0.01349   -0.01273    0.00126
C5    1    0.628689    0.442198    0.037288    11.00000    0.07433    0.01681 =
         0.03627    0.00754   -0.00175    0.00763
AFIX  43
H5    2    0.676365    0.436882    0.032635    11.00000   -1.20000
AFIX   0
C6    1    0.619406    0.498014    0.067390    11.00000    0.05183    0.01230 =
         0.03674    0.00860   -0.00541   -0.00061
AFIX  43
H6    2    0.660515    0.530929    0.082847    11.00000   -1.20000
AFIX   0
C7    1    0.412952    0.461392    0.063391    11.00000    0.05931    0.03633 =
         0.04052    0.02334   -0.01150   -0.00787
AFIX 137
H7A   2    0.403149    0.455112    0.098847    11.00000   -1.50000
H7B   2    0.378588    0.424195    0.042886    11.00000   -1.50000
H7C   2    0.407473    0.507776    0.054930    11.00000   -1.50000
AFIX   0
C8    1    0.584698    0.335740   -0.021629    11.00000    0.14384    0.03544 =
         0.06201   -0.02240   -0.02659    0.01186
AFIX 137
H8A   2    0.563809    0.289736   -0.008211    11.00000   -1.50000
H8B   2    0.637049    0.342348   -0.025198    11.00000   -1.50000
H8C   2    0.561900    0.337453   -0.054392    11.00000   -1.50000
AFIX   0

RESI SPhD 14
S1    6    0.424284    0.649600    0.219801    11.00000    0.02616    0.03142 =
         0.02793    0.00515   -0.00015    0.00660
C1    1    0.365353    0.624635    0.269775    11.00000    0.02570    0.01848 =
         0.03431    0.00736    0.00285   -0.00085
C2    1    0.292444    0.622925    0.264226    11.00000    0.02510    0.02434 =
         0.03993    0.00085   -0.00073    0.00296
C3    1    0.246889    0.598401    0.302726    11.00000    0.02714    0.03860 =
         0.04317    0.00429    0.00119    0.00113
AFIX  43
H3    2    0.196988    0.597301    0.298856    11.00000   -1.20000
AFIX   0
C4    1    0.269881    0.575413    0.346499    11.00000    0.03688    0.03610 =
         0.04254    0.00355    0.00320    0.00378
C5    1    0.343554    0.577974    0.351987    11.00000    0.03955    0.03803 =
         0.03371    0.01409    0.00342    0.00559
AFIX  43
H5    2    0.361509    0.563171    0.381636    11.00000   -1.20000
AFIX   0
C6    1    0.389918    0.601915    0.314461    11.00000    0.03445    0.03448 =
         0.03718    0.01451    0.00060    0.00281
AFIX  43
H6    2    0.439848    0.603275    0.318587    11.00000   -1.20000
AFIX   0
C7    1    0.262501    0.644331    0.216650    11.00000    0.03727    0.04440 =
         0.04744    0.00865   -0.00354    0.01260
AFIX 137
H7A   2    0.284761    0.694492    0.212488    11.00000   -1.50000
H7B   2    0.209794    0.636567    0.218664    11.00000   -1.50000
H7C   2    0.273564    0.615792    0.187995    11.00000   -1.50000
AFIX   0
C8    1    0.219608    0.545848    0.386972    11.00000    0.03857    0.07299 =
         0.05274    0.02303    0.01610    0.00318
AFIX 137
H8A   2    0.177929    0.566563    0.386825    11.00000   -1.50000
H8B   2    0.245467    0.557311    0.419495    11.00000   -1.50000
H8C   2    0.202610    0.494370    0.381016    11.00000   -1.50000
AFIX   0

RESI SPhD 15
S1    6    0.664709    0.689515    0.480221    11.00000    0.02889    0.03375 =
         0.02740    0.00971    0.00332    0.00475
C1    1    0.733147    0.714067    0.529465    11.00000    0.01902    0.04540 =
         0.01687    0.00645    0.01262    0.00507
C2    1    0.746069    0.778450    0.557217    11.00000    0.06129    0.05103 =
         0.03238   -0.00061   -0.00426    0.01757
C3    1    0.797080    0.789216    0.597047    11.00000    0.06433    0.05210 =
         0.03073    0.00336   -0.00591    0.01107
AFIX  43
H3    2    0.808226    0.833618    0.615700    11.00000   -1.20000
AFIX   0
C4    1    0.831617    0.740046    0.610655    11.00000    0.03917    0.05162 =
         0.03367    0.01019    0.00504    0.00109
C5    1    0.816490    0.678309    0.582892    11.00000    0.03983    0.05449 =
         0.03487    0.01070    0.00396    0.00739
AFIX  43
H5    2    0.840135    0.643260    0.591580    11.00000   -1.20000
AFIX   0
C6    1    0.768454    0.663480    0.542542    11.00000    0.03543    0.05180 =
         0.03367    0.00959    0.00517    0.01172
AFIX  43
H6    2    0.759498    0.619222    0.523831    11.00000   -1.20000
AFIX   0
C7    1    0.709945    0.834214    0.544792    11.00000    0.09743    0.06382 =
         0.04787   -0.00998   -0.01837    0.04049
AFIX 137
H7A   2    0.719191    0.845808    0.510028    11.00000   -1.50000
H7B   2    0.729216    0.876603    0.567089    11.00000   -1.50000
H7C   2    0.657553    0.817087    0.549048    11.00000   -1.50000
AFIX   0
C8    1    0.884271    0.755860    0.655520    11.00000    0.05070    0.07352 =
         0.03883   -0.00022   -0.01941   -0.01537
AFIX 137
H8A   2    0.908957    0.806405    0.658305    11.00000   -1.50000
H8B   2    0.920263    0.728262    0.651202    11.00000   -1.50000
H8C   2    0.857545    0.743110    0.685983    11.00000   -1.50000
AFIX   0

RESI SPhD 16
S1    6    0.427150    0.432085    0.232655    11.00000    0.03672    0.02847 =
         0.03130    0.00665   -0.00288   -0.00214
C1    1    0.334870    0.437085    0.240057    11.00000    0.03512    0.02530 =
         0.03469    0.00096   -0.00374   -0.00229
C2    1    0.296486    0.410736    0.281307    11.00000    0.03664    0.02617 =
         0.03615    0.00173   -0.00307   -0.00321
C3    1    0.222097    0.409229    0.281942    11.00000    0.03392    0.02650 =
         0.03954    0.00313   -0.00162   -0.00289
AFIX  43
H3    2    0.195082    0.391553    0.310003    11.00000   -1.20000
AFIX   0
C4    1    0.187152    0.432219    0.243735    11.00000    0.04049    0.02401 =
         0.04234   -0.00115   -0.01059    0.00141
C5    1    0.226577    0.457249    0.203702    11.00000    0.04431    0.02455 =
         0.04347    0.00262   -0.00730    0.00379
AFIX  43
H5    2    0.203460    0.473524    0.176867    11.00000   -1.20000
AFIX   0
C6    1    0.299263    0.459468    0.201295    11.00000    0.04343    0.01986 =
         0.03598   -0.00583   -0.00868   -0.00087
AFIX  43
H6    2    0.325258    0.476559    0.172698    11.00000   -1.20000
AFIX   0
C7    1    0.330672    0.386737    0.325979    11.00000    0.03981    0.07202 =
         0.04902    0.02809    0.00170    0.00572
AFIX 137
H7A   2    0.358639    0.353454    0.314618    11.00000   -1.50000
H7B   2    0.292568    0.363372    0.347978    11.00000   -1.50000
H7C   2    0.363001    0.427806    0.344343    11.00000   -1.50000
AFIX   0
C8    1    0.108699    0.430960    0.247853    11.00000    0.04136    0.06561 =
         0.07241    0.00117   -0.00133    0.02265
AFIX 137
H8A   2    0.087629    0.400822    0.274558    11.00000   -1.50000
H8B   2    0.082948    0.412116    0.216068    11.00000   -1.50000
H8C   2    0.104104    0.479116    0.255632    11.00000   -1.50000
AFIX   0

RESI SPhD 17
S1    6    0.705698    0.676035    0.033339    11.00000    0.03394    0.03164 =
         0.03010    0.00485    0.00099    0.00263
C1    1    0.770949    0.737207    0.000788    11.00000    0.04700    0.02754 =
         0.02111   -0.00397    0.00086    0.00455
C2    1    0.752070    0.788018   -0.026345    11.00000    0.05480    0.03901 =
         0.03427    0.00877    0.00383    0.00917
C3    1    0.806239    0.832219   -0.052887    11.00000    0.05583    0.05042 =
         0.03467    0.01614    0.00633    0.00677
AFIX  43
H3    2    0.794933    0.868701   -0.070743    11.00000   -1.20000
AFIX   0
C4    1    0.875096    0.823565   -0.053437    11.00000    0.05574    0.05094 =
         0.03064    0.00614    0.00358    0.00377
C5    1    0.893969    0.771816   -0.026333    11.00000    0.05306    0.04809 =
         0.04001    0.00677    0.00771    0.00686
AFIX  43
H5    2    0.942524    0.767604   -0.025651    11.00000   -1.20000
AFIX   0
C6    1    0.843488    0.728764   -0.001639    11.00000    0.04871    0.03617 =
         0.04414    0.00884    0.00884    0.01014
AFIX  43
H6    2    0.855460    0.691445    0.014851    11.00000   -1.20000
AFIX   0
C7    1    0.679405    0.799076   -0.026483    11.00000    0.05758    0.05589 =
         0.03475    0.01385    0.00629    0.01403
AFIX 137
H7A   2    0.644158    0.755083   -0.038282    11.00000   -1.50000
H7B   2    0.677170    0.836398   -0.048768    11.00000   -1.50000
H7C   2    0.667964    0.813193    0.007508    11.00000   -1.50000
AFIX   0
C8    1    0.933772    0.874514   -0.081404    11.00000    0.07286    0.08031 =
         0.05661    0.02168    0.01323   -0.00788
AFIX 137
H8A   2    0.937917    0.853538   -0.115005    11.00000   -1.50000
H8B   2    0.980395    0.883206   -0.063060    11.00000   -1.50000
H8C   2    0.920474    0.919334   -0.084008    11.00000   -1.50000
AFIX   0

RESI SPhD 18
S1    6    0.904344    0.506047    0.269143    11.00000    0.04482    0.02940 =
         0.03704    0.00560    0.00322    0.01073
C1    1    0.931380    0.469233    0.213068    11.00000    0.04085    0.02923 =
         0.02987    0.00635   -0.00330    0.01653
C2    1    0.901717    0.397370    0.197126    11.00000    0.05276    0.02845 =
         0.03905    0.00339   -0.01095    0.01744
C3    1    0.928602    0.371560    0.154226    11.00000    0.07049    0.04372 =
         0.04936   -0.00405   -0.00503    0.02545
AFIX  43
H3    2    0.907916    0.323794    0.142551    11.00000   -1.20000
AFIX   0
C4    1    0.983992    0.411736    0.127523    11.00000    0.06444    0.06437 =
         0.04410    0.00246   -0.00690    0.02700
C5    1    1.012499    0.480175    0.144139    11.00000    0.06147    0.06737 =
         0.05099   -0.00001    0.01328    0.01761
AFIX  43
H5    2    1.051203    0.508240    0.126590    11.00000   -1.20000
AFIX   0
C6    1    0.987096    0.510491    0.185795    11.00000    0.04778    0.04757 =
         0.04328    0.00972    0.00530    0.01596
AFIX  43
H6    2    1.007253    0.558952    0.195876    11.00000   -1.20000
AFIX   0
C7    1    0.841697    0.352280    0.224251    11.00000    0.06889    0.03534 =
         0.05975    0.00335    0.00374    0.01694
AFIX 137
H7A   2    0.856524    0.352584    0.259455    11.00000   -1.50000
H7B   2    0.830299    0.303742    0.209206    11.00000   -1.50000
H7C   2    0.798653    0.370755    0.221995    11.00000   -1.50000
AFIX   0
C8    1    1.011899    0.380086    0.080239    11.00000    0.12877    0.11556 =
         0.07226   -0.02174    0.01893    0.07491
AFIX 137
H8A   2    1.005970    0.329303    0.083063    11.00000   -1.50000
H8B   2    1.063372    0.403421    0.076687    11.00000   -1.50000
H8C   2    0.984128    0.387377    0.050850    11.00000   -1.50000
AFIX   0
HKLF 4

REM  cpj01_a.res in P-1
REM R1 =  0.0622 for   17944 Fo > 4sig(Fo)  and  0.1536 for all   33976 data
REM   2028 parameters refined using   1206 restraints

END

WGHT      0.0399    122.9476

REM Highest difference peak  1.663,  deepest hole -1.374,  1-sigma level  0.220
Q1    1   0.8843  0.9074  0.2144  11.00000  0.05    1.66
Q2    1   0.7032  0.6612  0.2307  11.00000  0.05    1.55
Q3    1   0.7696  0.4795  0.2406  11.00000  0.05    1.42
Q4    1   0.6406  0.6369  0.2401  11.00000  0.05    1.42
Q5    1   0.7615  0.6730  0.4279  11.00000  0.05    1.37
Q6    1   0.9424  0.4216  0.3895  11.00000  0.05    1.31
Q7    1   0.6791  0.6434  0.2939  11.00000  0.05    1.31
Q8    1   0.5243  0.4889  0.1830  11.00000  0.05    1.28
Q9    1   0.4983  0.5545  0.2199  11.00000  0.05    1.25
Q10   1   0.7740  0.6340  0.2390  11.00000  0.05    1.23
;
_shelx_res_checksum               35723
_shelx_hkl_file
;
  -2   0   0 1530.55   44.80
   2   0   0 1484.05   37.60
   2   0   0 1505.15   49.40
  -3   0   0   33.00   12.80
  -3   0   0   47.90   10.60
  -3   0   0   36.60   11.00
  -3   0   0   57.59    9.40
   3   0   0   61.09    9.20
   3   0   0   56.09   11.40
   3   0   0   50.29   10.60
   3   0   0   29.60   13.40
  -4   0   0   35.70   11.20
  -4   0   0   28.70   13.90
  -4   0   0   21.10   16.30
  -4   0   0   11.40   12.40
   4   0   0   -2.80   15.70
   4   0   0   38.10   10.40
   4   0   0    5.10   12.90
   4   0   0   35.60   13.20
  -5   0   0  524.75   29.20
  -5   0   0  530.75   27.50
  -5   0   0  534.15   25.60
  -5   0   0  495.25   33.30
   5   0   0  528.05   26.90
   5   0   0  503.85   24.40
   5   0   0  534.85   29.70
   5   0   0  544.15   34.80
  -6   0   0   31.30   15.20
  -6   0   0   21.60   18.80
  -6   0   0   39.60   13.50
  -6   0   0   24.30   14.50
   6   0   0   24.00   14.60
   6   0   0   26.80   21.20
   6   0   0    3.10   14.40
  -7   0   0 6362.66  159.48
  -7   0   0 6181.58  153.88
  -7   0   0 6266.27  166.28
  -7   0   0 6222.98  152.38
   7   0   0 6323.67  153.88
   7   0   0 6377.86  159.78
   7   0   0 6015.10  150.18
   7   0   0 6315.87  165.98
  -8   0   0 5133.49  149.49
  -8   0   0 5399.16  134.59
  -8   0   0 5466.95  142.99
  -8   0   0 4542.05  159.68
   8   0   0 5284.07  142.59
   8   0   0 5344.47  131.99
   8   0   0 5324.97  135.39
   8   0   0 5498.55  150.68
  -9   0   0  395.06   48.40
  -9   0   0  327.17   44.20
  -9   0   0  331.27   40.10
  -9   0   0  367.36   44.30
   9   0   0  357.16   46.50
   9   0   0  284.97   38.20
   9   0   0  392.96   46.90
   9   0   0  381.76   35.80
 -10   0   0  574.84   50.79
 -10   0   0  607.64   48.90
 -10   0   0  498.75   55.19
 -10   0   0  585.74   44.60
  10   0   0  615.84   38.90
  10   0   0  529.15   42.70
  10   0   0  560.94   58.09
  10   0   0  549.35   49.40
 -11   0   0   12.30   30.00
 -11   0   0  -17.60   30.20
 -11   0   0  -34.40   23.10
  11   0   0  -12.90   22.20
  11   0   0  -20.90   24.50
  11   0   0   -3.70   20.20
  11   0   0  -10.20   33.10
 -12   0   0   92.49   34.50
 -12   0   0  144.99   40.50
 -12   0   0   83.49   27.50
  12   0   0   62.09   28.00
  12   0   0  116.79   28.30
  12   0   0  114.79   42.40
  12   0   0  109.89   31.30
 -13   0   0 1062.89   66.99
 -13   0   0 1245.78   66.49
 -13   0   0 1308.17   79.39
  13   0   0 1181.08   64.29
  13   0   0 1266.97   64.79
  13   0   0 1176.58   68.09
 -14   0   0 1045.40   86.09
 -14   0   0 1055.59   75.19
 -14   0   0 1171.38   85.09
  14   0   0 1116.09   67.59
  14   0   0 1409.76   77.89
  14   0   0 1292.47   73.29
 -15   0   0 1518.35   84.19
 -15   0   0 1644.44   80.69
 -15   0   0 1439.36   97.89
  15   0   0 1504.85   86.99
  15   0   0 1651.23   84.19
  15   0   0 1413.56   78.59
 -16   0   0  -54.69   49.30
 -16   0   0    1.20   47.80
 -16   0   0  -21.30   35.20
  16   0   0  -65.29   33.60
  16   0   0  -56.69   40.60
  16   0   0    8.90   43.30
 -17   0   0   35.80   37.90
 -17   0   0  -10.80   55.49
 -17   0   0  -36.90   51.39
  17   0   0   -6.80   48.40
  17   0   0  -49.40   37.40
  17   0   0   14.00   46.50
 -18   0   0   31.20   57.69
 -18   0   0   69.69   42.70
 -18   0   0   11.90   63.99
  18   0   0  108.49   51.09
  18   0   0   17.90   44.50
  18   0   0  -24.70   69.79
 -19   0   0  230.28   51.89
 -19   0   0  295.27   78.29
 -19   0   0  258.87   67.09
  19   0   0  215.78   62.09
  19   0   0  151.38   55.29
 -20   0   0    5.20   72.99
 -20   0   0    7.20   49.30
  20   0   0  108.09   62.99
  20   0   0    8.90   51.99
 -21   0   0  123.69   55.29
  21   0   0   61.09   60.19
  21   0   0   59.79   70.39
 -22   0   0   51.99  109.29
 -22   0   0   81.69   60.09
  22   0   0   49.10   73.79
  22   0   0   -8.70   64.69
 -23   0   0   88.39   63.79
 -23   0   0   16.80  102.29
  23   0   0 -114.89   76.89
 -24   0   0  144.09  115.69
  24   0   0   12.40   84.19
 -25   0   0   20.20  133.29
  25   0   0  143.09   91.99
 -26   0   0  341.47  163.28
  26   0   0  -97.09   90.69
  26  -1   0  103.89  112.09
 -26   1   0  -41.00  170.08
  25  -1   0  -76.59   85.09
 -25   1   0   22.80  124.29
  24  -1   0  -43.00   75.09
 -24   1   0   25.40  110.99
  23  -1   0  167.88   80.99
 -23   1   0   -3.40   62.69
 -23   1   0   43.70  106.79
  22  -1   0  150.98   70.99
  22  -1   0   73.19   72.89
 -22   1   0   83.59   99.39
 -22   1   0  149.39   57.79
  21  -1   0  -14.60   66.99
  21  -1   0   29.60   53.99
 -21   1   0   41.00  102.99
 -21   1   0   23.10   50.29
  20  -1   0   43.90   60.29
  20  -1   0   30.40   54.99
 -20   1   0  -68.89   47.30
 -20   1   0   90.29   78.19
  19  -1   0    4.40   51.79
  19  -1   0  118.89   54.79
 -19   1   0  -20.40   44.60
 -19   1   0    6.80   56.39
 -19   1   0   15.30   63.09
  18  -1   0   35.30   45.10
  18  -1   0  -29.50   52.29
  18  -1   0   22.30   48.70
 -18   1   0    9.40   38.90
 -18   1   0   45.70   55.49
 -18   1   0  -14.00   55.39
  17  -1   0   62.69   42.00
  17  -1   0   57.89   49.99
  17  -1   0  -12.10   48.00
 -17   1   0   29.00   53.09
 -17   1   0  104.49   50.29
 -17   1   0   36.00   38.40
  16  -1   0   46.40   42.40
  16  -1   0   60.99   46.00
  16  -1   0   -4.90   37.40
 -16   1   0    8.60   47.00
 -16   1   0   90.69   37.70
 -16   1   0  102.89   48.90
  15  -1   0  334.17   44.80
  15  -1   0  487.95   73.99
  15  -1   0  371.76   50.09
 -15   1   0  336.37   52.29
 -15   1   0  338.07   58.69
 -15   1   0  357.66   53.39
  14  -1   0  447.46   57.89
  14  -1   0  276.57   39.40
  14  -1   0  404.56   51.19
 -14   1   0  324.37   42.50
 -14   1   0  416.06   65.09
 -14   1   0  258.27   46.10
  13  -1   0  824.12   56.29
  13  -1   0  877.21   61.49
  13  -1   0  846.92   52.99
 -13   1   0  970.90   58.09
 -13   1   0  836.72   59.39
 -13   1   0  914.41   69.59
  12  -1   0   48.60   40.70
  12  -1   0   47.20   27.50
  12  -1   0   40.60   24.40
  12  -1   0   64.29   28.20
 -12   1   0   44.90   25.50
 -12   1   0   10.80   29.50
 -12   1   0   17.60   34.70
  11  -1   0   38.20   34.90
  11  -1   0   37.00   26.40
  11  -1   0   12.80   19.80
  11  -1   0   24.80   23.90
 -11   1   0   47.00   25.10
 -11   1   0  -26.90   27.30
 -11   1   0  -25.80   30.90
  10  -1   0    8.30   22.80
  10  -1   0   15.60   20.20
  10  -1   0   18.70   26.10
  10  -1   0   13.50   34.20
 -10   1   0   17.90   27.00
 -10   1   0  -27.50   30.90
 -10   1   0  -18.30   23.00
   9  -1   0  143.09   37.30
   9  -1   0  150.18   23.80
   9  -1   0  132.99   33.00
   9  -1   0  137.49   28.50
  -9   1   0  175.28   32.40
  -9   1   0   58.19   24.50
  -9   1   0   64.19   35.10
   8  -1   0  716.03   54.79
   8  -1   0  765.92   39.50
   8  -1   0  740.13   41.80
   8  -1   0  720.53   47.70
  -8   1   0  709.73   42.40
  -8   1   0  751.92   42.20
  -8   1   0  689.23   53.49
   7  -1   0   50.29   17.70
   7  -1   0   60.29   25.70
   7  -1   0   69.29   18.70
   7  -1   0   52.79   15.20
  -7   1   0   46.90   17.10
  -7   1   0   49.60   24.10
  -7   1   0   79.69   18.90
   6  -1   0 1652.63   56.09
   6  -1   0 1618.44   49.99
   6  -1   0 1754.02   60.99
   6  -1   0 1545.25   49.60
  -6   1   0 1674.43   50.39
  -6   1   0 1632.34   49.70
  -6   1   0 1551.14   59.59
   5  -1   0   17.30   13.70
   5  -1   0   21.80   11.10
   5  -1   0   14.10   12.60
   5  -1   0    6.40   17.80
  -5   1   0    8.30   11.50
  -5   1   0   21.60   13.10
  -5   1   0    9.90   16.40
   4  -1   0  753.72   31.80
   4  -1   0  695.53   34.30
   4  -1   0  775.02   28.20
   4  -1   0  723.93   28.80
  -4   1   0  779.52   28.90
  -4   1   0  728.93   34.60
  -4   1   0  753.12   28.20
   3  -1   0   15.60    8.90
   3  -1   0   18.10   12.30
   3  -1   0   48.00   10.20
   3  -1   0   34.20   10.00
  -3   1   0   21.60    9.00
  -3   1   0   29.40   12.40
  -3   1   0   39.50   10.20
  -2  -1   0 1072.19   30.30
  -2  -1   0 1046.90   32.60
  -2  -1   0 1036.70   30.60
  -2  -1   0 1021.40   29.60
   2   1   0 1053.69   30.60
   2   1   0 1036.40   32.50
   2   1   0 1074.19   30.90
   2   1   0 1026.80   29.00
  -3  -1   0  156.08   22.00
  -3  -1   0  157.18   18.90
  -3  -1   0  148.19   18.70
  -3  -1   0  201.48   17.40
   3   1   0  154.08   22.40
   3   1   0  118.39   17.70
   3   1   0  192.08   19.20
   3   1   0  200.58   16.50
  -4  -1   0 1486.85   51.29
  -4  -1   0 1449.46   43.90
  -4  -1   0 1583.84   47.20
   4   1   0 1518.15   51.49
   4   1   0 1467.75   46.00
   4   1   0 1516.65   47.30
   4   1   0 1512.95   43.60
  -5  -1   0  101.89   17.60
  -5  -1   0  102.69   15.80
  -5  -1   0   94.89   13.70
  -5  -1   0   78.99   19.70
   5   1   0   66.49   15.00
   5   1   0   91.09   15.10
   5   1   0   89.39   16.20
   5   1   0   98.89   21.80
  -6  -1   0  856.61   37.80
  -6  -1   0  827.32   40.00
  -6  -1   0  809.02   43.40
  -6  -1   0  813.52   34.40
   6   1   0  812.12   33.60
   6   1   0  820.22   36.20
   6   1   0  833.42   39.70
   6   1   0  831.02   44.50
  -7  -1   0 3183.88  106.29
  -7  -1   0 3852.81  104.89
  -7  -1   0 3678.13  110.49
  -7  -1   0 3665.33   97.09
   7   1   0 3772.72  103.79
   7   1   0 3683.23   96.19
   7   1   0 3701.03  110.19
   7   1   0 3693.53   99.79
  -8  -1   0  790.82   44.20
  -8  -1   0  594.34   57.99
  -8  -1   0  748.63   47.30
  -8  -1   0  674.43   50.69
   8   1   0  607.04   44.20
   8   1   0  611.14   55.99
   8   1   0  688.33   40.50
   8   1   0  730.43   50.49
  -9  -1   0 1869.21   82.39
  -9  -1   0 1891.11   76.19
  -9  -1   0 1919.91   67.79
  -9  -1   0 1813.02   70.59
   9   1   0 1940.61   65.89
   9   1   0 1870.71   83.19
   9   1   0 1821.42   68.29
   9   1   0 1873.11   74.79
 -10  -1   0  147.09   38.00
 -10  -1   0  113.29   26.00
 -10  -1   0  126.49   30.00
 -10  -1   0  153.08   34.00
  10   1   0  143.79   39.80
  10   1   0  138.39   23.60
  10   1   0  133.99   28.20
  10   1   0  118.59   29.40
 -11  -1   0  188.28   36.80
 -11  -1   0  177.98   39.60
 -11  -1   0  185.78   29.50
 -11  -1   0   96.19   29.70
  11   1   0  191.48   26.80
  11   1   0  157.18   30.20
  11   1   0  199.58   32.40
  11   1   0  181.08   41.30
 -12  -1   0  346.37   46.30
 -12  -1   0  347.97   52.29
 -12  -1   0  391.66   54.69
  12   1   0  308.87   35.20
  12   1   0  369.26   46.30
  12   1   0  325.67   45.90
  12   1   0  446.76   62.89
 -13  -1   0  228.68   45.90
 -13  -1   0  192.68   47.10
 -13  -1   0  178.58   36.40
  13   1   0  189.18   33.10
  13   1   0  213.68   41.50
 -14  -1   0 4463.45  142.49
 -14  -1   0 4692.43  163.08
 -14  -1   0 4455.35  142.19
  14   1   0 4577.94  134.29
  14   1   0 4452.25  147.99
  14   1   0 4349.06  148.09
 -15  -1   0  467.15   72.39
 -15  -1   0  786.92   66.49
 -15  -1   0  687.03   80.29
  15   1   0  799.32   71.19
  15   1   0  738.63   65.19
  15   1   0  538.05   65.99
 -16  -1   0  179.48   42.60
 -16  -1   0  170.48   62.19
 -16  -1   0  138.29   55.09
  16   1   0  141.69   46.90
  16   1   0  122.89   46.10
  16   1   0  204.28   48.20
 -17  -1   0  132.79   42.90
 -17  -1   0  111.19   62.59
 -17  -1   0  123.19   60.99
  17   1   0   82.09   50.99
  17   1   0  151.98   48.00
 -18  -1   0  387.46   83.99
 -18  -1   0  307.47   51.79
 -18  -1   0  277.87   63.29
  18   1   0  329.87   58.59
  18   1   0  419.96   62.09
 -19  -1   0    3.90   45.80
 -19  -1   0   20.60   76.09
  19   1   0   14.90   51.29
  19   1   0   57.09   58.99
 -20  -1   0  131.79   80.19
 -20  -1   0  154.58   54.99
  20   1   0    9.20   54.79
  20   1   0  241.68   69.79
 -21  -1   0   84.39  116.09
 -21  -1   0  202.18   60.19
  21   1   0  207.58  100.39
  21   1   0  187.38   71.89
 -22  -1   0  138.29   66.89
 -22  -1   0   86.49  111.59
  22   1   0  -25.10   64.69
  22   1   0  296.57   82.99
 -23  -1   0    3.00   67.19
 -23  -1   0  106.99  107.99
  23   1   0  -24.30   68.09
 -24  -1   0  194.78  130.59
  24   1   0  -73.79   87.69
 -25  -1   0   70.59  160.38
  25   1   0   43.00  101.79
 -26  -1   0  135.89  144.49
  26   1   0  -45.90  100.99
  26  -2   0 -102.59   91.39
 -26   2   0  266.07  152.48
  25  -2   0  -14.30   97.29
 -25   2   0  -23.40  118.69
  24  -2   0  -77.29   79.29
 -24   2   0  -42.30   97.79
  23  -2   0   29.60   68.59
  23  -2   0   59.79   85.29
 -23   2   0   81.69   58.09
 -23   2   0   -3.50   94.09
  22  -2   0  378.96   82.19
  22  -2   0  294.77   76.69
 -22   2   0  149.29   99.19
 -22   2   0  237.68   57.79
  21  -2   0   63.49   59.79
  21  -2   0  157.08   63.89
 -21   2   0   86.59   90.59
 -21   2   0   23.30   48.60
  20  -2   0   60.09   52.69
  20  -2   0  109.89   61.69
 -20   2   0   16.80   77.39
 -20   2   0   58.59   46.00
  19  -2   0    8.90   53.29
  19  -2   0  -25.00   45.00
 -19   2   0   -2.10   42.10
 -19   2   0  -58.79   60.99
 -19   2   0  149.09   53.79
  18  -2   0   43.40   50.09
  18  -2   0    1.30   41.80
  18  -2   0   32.40   53.19
 -18   2   0   13.10   38.90
 -18   2   0  -18.50   60.79
 -18   2   0   63.89   51.19
  17  -2   0   33.10   46.40
  17  -2   0   32.10   37.20
  17  -2   0   99.49   48.90
 -17   2   0   63.29   40.10
 -17   2   0   26.50   57.09
 -17   2   0  149.59   50.79
  16  -2   0  -58.79   38.30
  16  -2   0   93.89   42.40
  16  -2   0  120.59   66.79
 -16   2   0   85.99   44.10
 -16   2   0    1.20   34.70
 -16   2   0   45.00   53.19
  15  -2   0  128.09   36.50
  15  -2   0   18.20   36.00
 -15   2   0   81.79   47.70
 -15   2   0   82.09   44.10
  14  -2   0    7.60   32.40
  14  -2   0   23.20   30.90
  14  -2   0  -71.29   30.00
 -14   2   0  -56.59   34.80
 -14   2   0  -21.70   38.00
  13  -2   0  -22.90   27.30
  13  -2   0   13.50   26.30
  13  -2   0  -11.20   27.90
 -13   2   0   -8.10   27.00
 -13   2   0   31.40   36.30
 -13   2   0    6.60   32.50
  12  -2   0   66.69   28.60
  12  -2   0   30.80   38.70
  12  -2   0    9.90   26.90
  12  -2   0   77.79   25.90
 -12   2   0   14.70   35.70
 -12   2   0   49.90   25.30
 -12   2   0   94.89   31.50
  11  -2   0   74.99   26.20
  11  -2   0  118.09   22.20
  11  -2   0  161.48   41.90
  11  -2   0  132.59   30.70
 -11   2   0   91.29   26.30
 -11   2   0  105.39   34.30
 -11   2   0  139.99   30.50
  10  -2   0  422.66   41.90
  10  -2   0  347.07   44.10
  10  -2   0  442.96   38.60
  10  -2   0  428.06   55.69
 -10   2   0  392.16   41.00
 -10   2   0  346.17   45.90
 -10   2   0  370.56   40.10
   9  -2   0  -18.00   45.00
   9  -2   0   60.39   33.50
   9  -2   0   25.20   25.50
   9  -2   0   37.90   22.30
  -9   2   0  -24.10   22.10
  -9   2   0  -24.00   30.30
   8  -2   0  262.97   34.20
   8  -2   0  225.78   36.80
   8  -2   0  261.27   33.90
   8  -2   0  215.58   29.20
  -8   2   0  205.78   35.20
  -8   2   0  206.48   24.90
  -8   2   0  243.18   32.60
   7  -2   0 1488.95   48.70
   7  -2   0 1436.86   54.59
   7  -2   0 1491.25   61.19
   7  -2   0 1422.76   49.80
  -7   2   0 1484.35   49.70
  -7   2   0 1544.35   49.70
  -7   2   0 1401.76   59.49
   6  -2   0   27.40   14.90
   6  -2   0   12.00   18.60
   6  -2   0    6.00   15.30
   6  -2   0   15.50   13.70
  -6   2   0    3.00   11.90
  -6   2   0   12.90   13.20
  -6   2   0   14.50   18.80
   5  -2   0   15.10   13.40
   5  -2   0    3.80   12.60
   5  -2   0   -0.60   17.20
   5  -2   0   -2.10   11.10
  -5   2   0   14.30   15.60
  -5   2   0   -0.60   12.30
  -5   2   0    9.00   11.10
   4  -2   0  116.39   19.30
   4  -2   0  112.99   14.90
   4  -2   0  111.79   14.00
  -4   2   0   85.39   18.50
  -4   2   0  115.19   13.60
   3  -2   0   -4.80   12.20
   3  -2   0    4.30    9.40
  -3   2   0    8.00   13.10
  -3   2   0    0.30    8.80
   2  -2   0 1777.72   47.60
   2  -2   0 1782.02   46.20
   2  -2   0 1798.82   45.70
   2  -2   0 1703.63   46.10
  -2   2   0 1726.73   47.80
  -2   2   0 1873.41   47.50
  -2   2   0 1793.02   47.50
  -2   2   0 1833.22   46.80
   1  -2   0   27.50    4.90
   1  -2   0    3.70    2.90
   1  -2   0   13.30    5.20
   0   2   0  493.15   19.10
  -1  -2   0  427.06   15.70
  -1  -2   0  450.85   17.90
  -1  -2   0  455.35   19.60
  -1  -2   0  420.66   17.80
   1   2   0  418.16   17.90
   1   2   0  445.66   19.50
   1   2   0  488.15   18.20
   1   2   0  429.16   18.30
  -2  -2   0  438.16   23.70
  -2  -2   0  421.06   23.90
  -2  -2   0  457.25   20.70
  -2  -2   0  490.35   22.20
   2   2   0  428.86   23.40
   2   2   0  424.36   24.90
   2   2   0  465.15   21.50
   2   2   0  458.55   21.40
  -3  -2   0 4309.97  103.89
  -3  -2   0 4051.79  102.69
  -3  -2   0 4305.67  108.29
  -3  -2   0 4187.68  105.49
   3   2   0 4318.87  106.19
   3   2   0 4225.38  102.99
   3   2   0 4357.96  108.19
   3   2   0 4202.78  103.99
  -4  -2   0  341.97   25.80
  -4  -2   0  324.27   28.00
  -4  -2   0  363.06   25.80
  -4  -2   0  358.36   22.90
   4   2   0  316.87   24.70
   4   2   0  317.47   24.80
   4   2   0  348.07   29.30
  -5  -2   0    4.70   14.60
  -5  -2   0  -13.20   16.50
  -5  -2   0   -8.20   13.40
  -5  -2   0   20.50   12.00
   5   2   0   -4.20   17.10
   5   2   0   -6.20   11.40
   5   2   0    3.50   13.60
   5   2   0   -3.40   12.70
  -6  -2   0  109.29   24.50
  -6  -2   0  124.59   17.80
  -6  -2   0  139.79   21.00
   6   2   0  137.79   27.50
   6   2   0  123.59   20.60
   6   2   0  127.39   17.40
   6   2   0  104.29   21.40
  -7  -2   0  148.99   24.50
  -7  -2   0  165.98   28.40
  -7  -2   0  129.39   31.50
  -7  -2   0  177.88   22.80
   7   2   0  120.49   27.00
   7   2   0  129.59   24.80
   7   2   0  130.09   33.40
   7   2   0  139.79   20.10
  -8  -2   0 1097.59   55.39
  -8  -2   0 1101.19   50.59
  -8  -2   0 1110.79   58.29
   8   2   0 1070.89   56.29
   8   2   0 1065.99   66.59
   8   2   0  996.30   53.09
   8   2   0 1108.29   59.49
  -9  -2   0   32.70   24.50
  -9  -2   0   77.69   24.20
  -9  -2   0   37.70   34.00
  -9  -2   0   69.49   29.80
   9   2   0   44.10   22.30
   9   2   0   27.60   24.30
   9   2   0    9.30   25.80
   9   2   0   18.00   34.50
 -10  -2   0  247.18   30.30
 -10  -2   0  324.17   47.00
 -10  -2   0  236.98   40.50
 -10  -2   0  340.27   46.60
  10   2   0  310.47   43.60
  10   2   0  272.37   46.20
  10   2   0  308.67   38.00
  10   2   0  265.27   40.40
 -11  -2   0   18.30   28.80
 -11  -2   0   31.30   31.80
 -11  -2   0  -26.90   32.20
 -11  -2   0   22.90   25.80
  11   2   0    5.80   24.20
  11   2   0   16.10   35.80
  11   2   0  -14.10   23.60
  11   2   0   37.70   29.60
 -12  -2   0   22.60   35.90
 -12  -2   0    3.30   27.40
 -12  -2   0  -29.80   34.40
  12   2   0   11.70   26.60
  12   2   0  -13.60   30.60
  12   2   0  -24.90   27.60
  12   2   0   56.69   40.60
 -13  -2   0 2064.09  116.89
 -13  -2   0 2247.68  104.39
 -13  -2   0 2005.50   91.49
  13   2   0 2206.28   84.59
  13   2   0 2107.69   92.49
  13   2   0 2215.48   93.19
 -14  -2   0 1145.09   82.79
 -14  -2   0 1240.18   73.49
 -14  -2   0 1306.67   91.19
  14   2   0 1321.27   76.59
  14   2   0 1412.96   80.69
  14   2   0 1167.28   71.79
 -15  -2   0  254.77   43.40
 -15  -2   0  267.17   55.69
 -15  -2   0  271.27   60.79
  15   2   0  199.58   44.60
  15   2   0  346.77   52.59
  15   2   0  182.78   42.10
 -16  -2   0  261.67   66.89
 -16  -2   0  281.97   61.09
 -16  -2   0  280.77   45.30
  16   2   0  163.88   44.60
  16   2   0  206.88   49.50
  16   2   0  323.77   53.99
 -17  -2   0  265.67   71.09
 -17  -2   0  179.68   46.10
 -17  -2   0   97.69   59.69
  17   2   0  272.37   55.29
  17   2   0  129.99   45.20
 -18  -2   0  145.79   70.29
 -18  -2   0   23.70   63.99
 -18  -2   0  157.68   48.60
  18   2   0   13.90   45.50
  18   2   0  151.38   58.19
 -19  -2   0   20.70   48.30
 -19  -2   0   87.79   81.39
  19   2   0  -14.70   48.60
  19   2   0   79.09   61.29
 -20  -2   0   79.79   54.99
 -20  -2   0  -12.00   76.09
  20   2   0  110.29   66.59
  20   2   0   64.59   55.99
 -21  -2   0  257.77  105.59
 -21  -2   0  262.67   65.59
  21   2   0  315.17   87.39
 -22  -2   0  202.28   70.19
 -22  -2   0  157.68  111.19
  22   2   0   52.49   66.89
  22   2   0  224.18   80.09
 -23  -2   0  120.39  108.99
 -23  -2   0   64.49   71.39
  23   2   0    7.40   71.79
 -24  -2   0  314.37  156.88
  24   2   0  -49.80   86.59
 -25  -2   0  297.17  142.29
  25   2   0 -168.88   99.99
  27  -3   0  -14.20  105.29
 -27   3   0   49.99  186.68
  26  -3   0   18.00  107.69
 -26   3   0  -92.29  133.29
  25  -3   0    2.30   79.49
 -25   3   0  126.49  128.69
  24  -3   0   61.29   78.19
 -24   3   0  148.19   70.09
 -24   3   0   71.29  102.69
  23  -3   0   64.69   74.29
  23  -3   0  205.48   78.49
 -23   3   0  106.49   56.49
 -23   3   0  222.58  100.09
  22  -3   0  270.87   69.69
  22  -3   0   52.39   68.89
 -22   3   0   97.09   52.29
 -22   3   0  123.69   92.19
  21  -3   0  495.45   79.09
  21  -3   0  295.07   71.69
 -21   3   0  398.46   57.29
 -21   3   0  445.66   96.89
  20  -3   0  -15.40   48.90
  20  -3   0  152.68   60.59
 -20   3   0   49.80   68.59
 -20   3   0   63.99   44.60
  19  -3   0  -67.59   57.69
  19  -3   0   74.99   52.89
 -19   3   0   13.60   40.80
 -19   3   0   37.60   67.29
  18  -3   0   33.30   48.00
  18  -3   0  -47.80   41.10
 -18   3   0    9.50   37.10
 -18   3   0   -9.50   60.19
  17  -3   0   40.40   38.30
  17  -3   0  -81.09   41.50
  17  -3   0   67.09   46.90
 -17   3   0   26.60   38.00
 -17   3   0   -7.70   54.69
  16  -3   0   -2.20   35.20
  16  -3   0  -51.69   36.60
 -16   3   0  -43.70   46.90
 -16   3   0  -41.80   32.90
  15  -3   0  -47.40   30.20
  15  -3   0    0.00   36.20
 -15   3   0  -53.19   44.70
 -15   3   0  -34.40   37.30
 -15   3   0    0.30   42.80
  14  -3   0  -34.80   32.20
  14  -3   0  -82.09   30.80
  14  -3   0  -23.60   27.80
 -14   3   0  -32.50   30.70
 -14   3   0  -18.40   38.80
 -14   3   0   11.10   35.00
  13  -3   0  -46.60   26.80
  13  -3   0  -25.90   27.40
  13  -3   0   15.70   27.80
 -13   3   0  -28.20   24.30
 -13   3   0  -67.89   31.90
 -13   3   0    9.20   29.60
  12  -3   0  346.37   49.20
  12  -3   0  428.76   43.60
  12  -3   0  412.76   60.99
  12  -3   0  366.76   43.70
 -12   3   0  429.16   41.70
 -12   3   0  465.45   45.70
 -12   3   0  362.66   53.59
  11  -3   0 1065.49   49.99
  11  -3   0 1083.59   69.39
  11  -3   0 1048.10   60.79
  11  -3   0  999.60   52.29
 -11   3   0 1076.69   53.79
 -11   3   0 1069.09   51.59
 -11   3   0 1013.60   65.09
  10  -3   0  109.29   37.80
  10  -3   0   93.29   27.40
  10  -3   0  145.69   29.60
  10  -3   0   85.79   25.10
 -10   3   0  112.19   27.80
 -10   3   0  104.29   34.80
 -10   3   0   99.99   24.50
   9  -3   0  -38.10   31.00
   9  -3   0   12.50   22.60
   9  -3   0   18.50   26.30
  -9   3   0  -48.00   20.90
  -9   3   0  -16.50   29.80
   8  -3   0 1777.62   74.39
   8  -3   0 1703.63   60.69
   8  -3   0 1737.43   66.59
   8  -3   0 1755.52   60.19
  -8   3   0 1792.52   59.99
  -8   3   0 1619.54   72.99
   7  -3   0  160.28   21.80
   7  -3   0  202.08   30.60
   7  -3   0  213.98   26.50
   7  -3   0  197.98   27.30
  -7   3   0  193.28   25.60
  -7   3   0  174.38   29.40
   6  -3   0  744.63   35.50
   6  -3   0  685.73   40.40
   6  -3   0  725.63   32.70
   6  -3   0  694.83   33.50
  -6   3   0  746.23   31.70
  -6   3   0  715.53   39.80
   5  -3   0 1908.21   54.19
   5  -3   0 1756.62   54.09
   5  -3   0 1882.81   61.69
  -5   3   0 1858.41   52.89
  -5   3   0 1833.52   61.79
   4  -3   0   21.30   11.90
   4  -3   0   17.70   15.10
   4  -3   0    0.40   13.00
   4  -3   0   20.00   12.30
  -4   3   0   15.80   16.00
  -4   3   0   15.10   11.70
   3  -3   0 3980.60   97.39
   3  -3   0 3975.60   99.99
   3  -3   0 3988.20   96.59
   3  -3   0 3886.01   97.59
  -3   3   0 3832.92   97.69
  -3   3   0 3922.71   96.49
  -3   3   0 4002.50  100.29
  -3   3   0 4053.89   98.09
   2  -3   0  271.17   19.10
   2  -3   0  258.07   18.70
   2  -3   0  279.67   19.90
   2  -3   0  254.47   18.00
  -2   3   0  272.17   18.60
  -2   3   0  262.67   20.00
  -2   3   0  248.18   19.30
   1  -3   0   -5.80    9.30
   1  -3   0   -1.00    7.40
   1  -3   0    2.70   10.00
  -1   3   0   -1.30    9.60
  -1   3   0   -7.00    7.10
   0  -3   0  258.47   20.00
   0  -3   0  291.67   19.10
   0  -3   0  296.47   18.70
   0  -3   0  310.27   15.70
   0   3   0  303.27   18.30
   0   3   0  303.27   18.10
   0   3   0  289.37   20.70
   0   3   0  293.97   15.90
  -1  -3   0   46.90   11.40
  -1  -3   0   42.60   14.10
  -1  -3   0   50.09    8.90
  -1  -3   0   29.30   13.10
   1   3   0   48.70   13.80
   1   3   0   37.00   10.50
   1   3   0   43.80    9.20
   1   3   0   24.30   13.40
  -2  -3   0 2984.30   79.39
  -2  -3   0 2860.91   76.99
  -2  -3   0 2891.81   73.39
  -2  -3   0 2921.21   75.99
   2   3   0 2914.41   77.09
   2   3   0 3022.70   77.79
   2   3   0 2892.81   78.79
   2   3   0 2844.82   73.49
  -3  -3   0   -3.00   15.40
  -3  -3   0   23.40   14.90
  -3  -3   0   22.60   11.40
  -3  -3   0    2.70   11.20
   3   3   0   10.30   14.60
   3   3   0   34.40   11.80
   3   3   0   15.40   11.90
   3   3   0    8.30   16.10
  -4  -3   0   58.99   13.50
  -4  -3   0   49.20   17.40
  -4  -3   0   31.40   12.80
  -4  -3   0   59.49   18.10
   4   3   0   56.99   13.70
   4   3   0   76.29   13.90
   4   3   0   46.10   16.60
  -5  -3   0  147.29   23.70
  -5  -3   0  173.58   23.90
  -5  -3   0  189.68   25.50
  -5  -3   0  183.08   24.00
   5   3   0  171.68   26.10
   5   3   0  164.48   22.30
   5   3   0  183.68   26.10
   5   3   0  146.69   17.40
  -6  -3   0   -3.50   21.40
  -6  -3   0   -4.70   23.20
  -6  -3   0   -6.90   17.80
  -6  -3   0   23.70   16.50
   6   3   0   -2.00   15.90
   6   3   0   -2.80   17.10
   6   3   0  -13.70   24.10
   6   3   0  -24.30   19.70
  -7  -3   0  317.67   41.90
  -7  -3   0  307.77   37.50
  -7  -3   0  286.27   39.40
  -7  -3   0  301.07   42.00
   7   3   0  302.67   34.00
   7   3   0  325.27   35.90
   7   3   0  293.97   40.90
   7   3   0  302.77   41.60
  -8  -3   0  193.28   26.90
  -8  -3   0  180.58   28.60
  -8  -3   0  207.78   34.40
  -8  -3   0  166.88   39.40
   8   3   0  192.18   25.60
   8   3   0  186.58   32.70
   8   3   0  200.68   40.70
   8   3   0  125.29   32.70
  -9  -3   0  146.39   37.10
  -9  -3   0  161.08   26.70
  -9  -3   0  178.88   34.10
  -9  -3   0  145.99   30.50
   9   3   0  143.09   31.40
   9   3   0  165.58   25.90
   9   3   0  198.68   42.20
   9   3   0  142.79   28.30
 -10  -3   0   56.99   23.90
 -10  -3   0   56.29   32.10
 -10  -3   0   42.00   33.10
 -10  -3   0   23.50   27.60
  10   3   0    7.20   27.90
  10   3   0   61.89   38.30
  10   3   0   21.80   24.20
  10   3   0   30.40   22.90
 -11  -3   0  -17.20   27.70
 -11  -3   0  -13.10   33.40
 -11  -3   0  -32.20   25.10
 -11  -3   0    0.50   32.00
  11   3   0   11.80   31.10
  11   3   0   74.79   41.20
  11   3   0   10.70   24.30
  11   3   0   -3.80   25.90
 -12  -3   0  559.14   60.69
 -12  -3   0  577.34   65.29
  12   3   0  572.34   69.99
  12   3   0  622.34   56.79
  12   3   0  616.74   54.29
  12   3   0  723.33   53.29
 -13  -3   0  797.32   71.69
 -13  -3   0  992.80   79.79
 -13  -3   0 1055.29   66.09
  13   3   0  966.50   68.59
  13   3   0  997.00   64.39
  13   3   0 1072.09   68.19
 -14  -3   0   50.99   47.20
 -14  -3   0   92.59   36.40
 -14  -3   0   66.39   47.80
  14   3   0   41.50   41.90
  14   3   0   69.89   39.50
  14   3   0   33.10   33.40
 -15  -3   0  657.23   84.29
 -15  -3   0  727.83   66.29
 -15  -3   0  495.15   77.99
  15   3   0  658.13   68.89
  15   3   0  620.74   67.79
 -16  -3   0  122.09   42.80
 -16  -3   0   61.99   60.09
 -16  -3   0  115.09   59.39
  16   3   0   81.89   47.10
  16   3   0   74.99   42.70
 -17  -3   0  -47.20   62.19
 -17  -3   0  -53.39   60.99
 -17  -3   0   -9.20   41.50
  17   3   0    8.80   43.70
  17   3   0   78.89   53.19
 -18  -3   0 -138.29   64.79
 -18  -3   0    3.20   68.89
  18   3   0   30.50   45.50
  18   3   0   40.10   57.59
 -19  -3   0  -53.99   78.89
 -19  -3   0  -38.10   47.80
  19   3   0  -20.90   65.49
  19   3   0   10.10   49.30
 -20  -3   0  -25.20   57.49
 -20  -3   0  -65.49   79.89
  20   3   0  -53.79   54.29
  20   3   0  129.69   71.29
 -21  -3   0   61.49   64.29
 -21  -3   0  173.28  109.59
  21   3   0  240.38   92.49
  21   3   0  -24.50   61.79
 -22  -3   0  155.28  106.69
 -22  -3   0  166.68   68.89
  22   3   0  240.48   86.49
  22   3   0    8.30   69.79
 -23  -3   0  117.89  135.09
 -23  -3   0   77.99   75.19
  23   3   0 -112.39   77.39
 -24  -3   0  -52.69  120.19
  24   3   0  175.88   90.19
 -25  -3   0   89.89  151.48
  25   3   0   74.29  105.59
  27  -4   0   77.29  124.39
 -27   4   0  165.48  184.08
  26  -4   0  -46.30   85.79
 -26   4   0   22.30  145.09
  25  -4   0  -27.30   91.09
 -25   4   0  -93.09  123.79
  24  -4   0  -42.50   74.99
 -24   4   0   90.69   66.39
 -24   4   0  192.28  118.39
  23  -4   0  189.58   76.59
  23  -4   0  -38.70   64.59
 -23   4   0   64.49   56.09
 -23   4   0   -1.10  101.39
  22  -4   0  177.38  102.59
  22  -4   0  441.56   79.49
 -22   4   0  242.88   58.79
 -22   4   0  262.37  104.49
  21  -4   0  130.69   59.59
  21  -4   0  172.78   65.89
 -21   4   0   37.60   48.70
 -21   4   0   53.79   82.09
  20  -4   0   71.19   55.29
  20  -4   0   90.59   58.99
 -20   4   0   73.59   42.90
 -20   4   0   72.79   79.29
  19  -4   0   21.70   50.59
  19  -4   0   -0.50   45.70
 -19   4   0   63.49   39.40
 -19   4   0   47.40   66.59
  18  -4   0  -37.60   49.00
  18  -4   0  -10.50   45.50
  18  -4   0   -3.50   43.10
 -18   4   0  -13.90   55.49
 -18   4   0   -2.10   36.00
  17  -4   0  -36.10   42.30
  17  -4   0   41.20   47.10
  17  -4   0    3.30   37.10
 -17   4   0   76.19   37.60
 -17   4   0   67.79   59.29
  16  -4   0  -52.09   33.90
 -16   4   0   -5.10   32.50
 -16   4   0   14.70   47.50
  15  -4   0   55.59   33.30
  15  -4   0   21.30   37.60
  15  -4   0  -89.29   33.90
 -15   4   0  -49.60   48.90
 -15   4   0   -2.80   45.80
  14  -4   0  -19.40   32.20
  14  -4   0   65.59   30.30
  14  -4   0   79.39   36.20
 -14   4   0  100.19   42.70
 -14   4   0   24.50   32.30
  13  -4   0   82.79   30.00
  13  -4   0   61.49   31.00
  13  -4   0   46.50   29.90
 -13   4   0   72.59   27.40
 -13   4   0   96.99   40.50
  12  -4   0   13.30   26.50
  12  -4   0   -8.90   34.00
  12  -4   0   15.40   26.40
  12  -4   0    7.60   26.80
 -12   4   0   -6.80   22.50
 -12   4   0   -2.60   31.70
  11  -4   0   34.00   25.80
  11  -4   0   61.99   29.80
  11  -4   0   46.70   23.70
  11  -4   0   89.29   37.30
 -11   4   0   44.40   23.40
 -11   4   0   53.99   33.00
  10  -4   0  359.96   40.10
  10  -4   0  394.36   42.60
  10  -4   0  371.46   53.29
  10  -4   0  327.87   46.50
 -10   4   0  382.46   39.00
 -10   4   0  335.77   50.69
   9  -4   0  132.19   29.10
   9  -4   0   44.70   32.20
   9  -4   0   52.49   24.00
  -9   4   0   63.59   22.70
  -9   4   0   43.90   33.70
   8  -4   0  611.84   48.30
   8  -4   0  748.23   43.10
   8  -4   0  620.04   52.29
   8  -4   0  711.23   43.60
  -8   4   0  601.84   40.20
  -8   4   0  631.74   52.69
   7  -4   0  104.39   21.00
   7  -4   0   44.10   19.60
   7  -4   0   66.79   18.30
   7  -4   0   80.39   27.00
   7  -4   0   87.89   21.70
  -7   4   0   62.59   17.40
  -7   4   0   57.89   25.50
   6  -4   0  731.83   34.00
   6  -4   0  643.64   33.60
   6  -4   0  693.63   33.10
   6  -4   0  767.02   39.40
   6  -4   0  656.03   41.00
  -6   4   0  702.03   32.60
  -6   4   0  675.43   40.00
   5  -4   0   11.10   12.10
   5  -4   0    2.50   12.10
   5  -4   0   -0.40   16.10
   5  -4   0   -2.20   13.30
  -5   4   0   -1.30   11.50
  -5   4   0   -3.40   16.60
   4  -4   0  242.68   26.70
   4  -4   0  300.77   26.10
   4  -4   0  255.07   29.50
   4  -4   0  264.97   22.70
  -4   4   0  274.67   23.20
  -4   4   0  303.47   26.30
  -4   4   0  286.67   24.10
   3  -4   0  168.08   22.30
   3  -4   0  184.78   22.10
   3  -4   0  181.38   22.20
  -3   4   0  169.98   21.10
  -3   4   0  186.98   17.70
  -3   4   0  170.78   22.00
   2  -4   0  163.78   19.40
   2  -4   0  174.18   19.30
  -2   4   0  142.89   22.10
  -2   4   0  148.29   19.20
   1  -4   0 1118.39   36.50
   1  -4   0 1094.59   33.70
   1  -4   0 1131.79   40.90
  -1   4   0 1073.09   34.00
  -1   4   0 1115.69   36.40
  -1   4   0 1031.20   39.90
   0  -4   0   11.80   14.30
   0  -4   0   30.30    9.40
   0  -4   0   38.90   14.10
   0  -4   0   24.70   12.00
   0   4   0    7.60   14.50
   0   4   0   32.20   13.50
   0   4   0   13.50   10.10
  -1  -4   0  363.46   24.90
  -1  -4   0  350.36   24.70
  -1  -4   0  354.36   20.10
  -1  -4   0  342.87   27.00
   1   4   0  350.66   24.50
   1   4   0  337.27   25.20
   1   4   0  312.67   27.40
   1   4   0  362.26   21.50
  -2  -4   0  134.99   18.00
  -2  -4   0  110.89   15.20
  -2  -4   0  127.39   18.20
  -2  -4   0  129.59   25.50
   2   4   0  140.99   19.00
   2   4   0  112.89   16.00
   2   4   0  142.49   18.30
   2   4   0  110.59   19.90
  -3  -4   0  158.98   22.20
  -3  -4   0  185.68   23.20
  -3  -4   0  171.28   21.80
   3   4   0  161.28   24.70
   3   4   0  176.18   21.90
   3   4   0  173.48   21.10
   3   4   0  154.48   18.00
  -4  -4   0   69.49   19.80
  -4  -4   0   63.29   15.00
  -4  -4   0   62.39   15.60
  -4  -4   0   57.29   20.00
   4   4   0   74.19   15.80
   4   4   0   58.39   14.70
   4   4   0   64.49   19.30
   4   4   0   58.99   21.50
  -5  -4   0   26.10   16.00
  -5  -4   0   -7.40   21.50
  -5  -4   0   -6.50   21.10
  -5  -4   0   24.50   16.10
   5   4   0    5.50   16.30
   5   4   0   -8.60   19.60
   5   4   0  -14.80   22.30
   5   4   0   13.40   15.60
  -6  -4   0 2400.76   86.19
  -6  -4   0 2515.65   78.29
  -6  -4   0 2567.14   78.89
  -6  -4   0 2501.45   83.39
   6   4   0 2482.15   83.09
   6   4   0 2480.95   79.59
   6   4   0 2531.45   87.69
   6   4   0 2526.25   76.79
  -7  -4   0  195.38   27.70
  -7  -4   0  168.38   38.60
  -7  -4   0  254.57   29.80
  -7  -4   0  247.78   35.50
   7   4   0  233.18   34.70
   7   4   0  272.07   38.20
   7   4   0  222.18   39.30
   7   4   0  224.48   30.40
  -8  -4   0  434.66   41.70
  -8  -4   0  349.77   46.60
  -8  -4   0  360.46   46.80
  -8  -4   0  291.77   42.30
   8   4   0  302.47   40.40
   8   4   0  320.07   38.50
   8   4   0  326.37   43.40
   8   4   0  357.66   46.90
  -9  -4   0  397.86   46.70
  -9  -4   0  384.16   41.80
  -9  -4   0  385.76   48.40
  -9  -4   0  318.97   49.70
   9   4   0  298.97   39.50
   9   4   0  323.17   45.20
   9   4   0  345.27   43.70
   9   4   0  382.56   57.39
 -10  -4   0   29.40   28.30
 -10  -4   0   14.50   25.00
 -10  -4   0   21.70   32.00
 -10  -4   0   17.40   31.80
  10   4   0  -33.70   23.80
  10   4   0  -14.70   22.90
  10   4   0   31.40   38.10
 -11  -4   0  969.30   69.29
 -11  -4   0  967.30   67.09
 -11  -4   0  967.80   66.59
 -11  -4   0  894.21   88.29
  11   4   0 1020.70   72.49
  11   4   0  967.20   60.89
  11   4   0  981.10   56.89
  11   4   0 1050.89   62.09
 -12  -4   0  556.24   62.79
 -12  -4   0  698.33   56.59
 -12  -4   0  611.14   65.49
  12   4   0  583.14   58.79
  12   4   0  659.33   57.59
  12   4   0  589.04   55.69
 -13  -4   0  -26.70   41.70
 -13  -4   0   26.40   30.90
 -13  -4   0   11.90   43.30
  13   4   0   15.10   32.90
  13   4   0  -36.40   36.90
  13   4   0   27.80   36.30
 -14  -4   0  332.97   63.69
 -14  -4   0  258.27   54.39
 -14  -4   0  316.87   43.80
  14   4   0  226.78   46.00
  14   4   0  286.77   44.50
  14   4   0  326.17   51.89
 -15  -4   0  174.38   42.90
 -15  -4   0  217.88   63.29
 -15  -4   0  189.18   54.99
  15   4   0  235.18   46.20
  15   4   0  276.77   54.29
 -16  -4   0    9.60   42.40
 -16  -4   0  -57.39   55.59
 -16  -4   0   99.89   56.19
  16   4   0  -11.30   38.60
  16   4   0   14.40   49.70
 -17  -4   0 -130.59   62.89
 -17  -4   0   -5.90   43.90
 -17  -4   0  -35.60   64.59
  17   4   0  106.89   54.19
  17   4   0   17.90   46.20
 -18  -4   0   53.59   69.69
 -18  -4   0   47.10   49.60
  18   4   0   60.29   63.09
  18   4   0  -26.50   49.50
 -19  -4   0   62.99   52.99
 -19  -4   0  -48.20   75.29
  19   4   0  -52.59   53.29
  19   4   0   66.39   66.39
 -20  -4   0   97.29  104.99
 -20  -4   0   20.40   59.89
  20   4   0  129.89   75.49
  20   4   0  -97.49   54.89
 -21  -4   0   90.99   65.69
 -21  -4   0   99.69  101.79
  21   4   0  101.19   84.69
  21   4   0  -76.79   61.39
 -22  -4   0  181.78   70.19
 -22  -4   0  175.08  114.29
  22   4   0  105.39  102.39
  22   4   0    3.40   68.99
 -23  -4   0  100.69   83.09
 -23  -4   0  114.99  126.89
  23   4   0   38.00   78.39
 -24  -4   0   -7.20  138.69
  24   4   0   66.69   88.99
 -25  -4   0  170.08  163.68
  25   4   0 -177.38   93.59
  27  -5   0  -42.00   99.99
 -27   5   0   -2.70  175.08
  26  -5   0  -38.60   89.69
 -26   5   0  -38.80  154.38
  25  -5   0    0.10   91.39
 -25   5   0  108.19  139.09
  24  -5   0   63.19   75.89
 -24   5   0   79.39   68.19
 -24   5   0  -62.69  106.19
  23  -5   0  291.57   77.09
  23  -5   0    7.90   72.59
 -23   5   0  120.49   56.29
 -23   5   0   27.30   99.09
  22  -5   0  294.57   74.39
 -22   5   0  169.48   92.49
 -22   5   0  118.69   58.79
  21  -5   0  165.48   63.39
  21  -5   0  290.47   64.89
 -21   5   0  267.17   84.99
 -21   5   0  240.48   53.09
  20  -5   0   36.50   55.39
  20  -5   0   -5.60   49.70
 -20   5   0  -36.80   73.29
 -20   5   0  100.49   44.90
  19  -5   0  -72.59   55.69
  19  -5   0   19.20   50.39
  19  -5   0   62.59   50.69
 -19   5   0   98.59   40.60
 -19   5   0   32.80   67.39
  18  -5   0   95.99   49.90
  18  -5   0   70.69   46.50
 -18   5   0   53.89   37.10
 -18   5   0   73.49   59.89
  17  -5   0  210.98   52.59
  17  -5   0  116.89   43.00
  17  -5   0   76.59   45.40
 -17   5   0  166.58   39.00
 -17   5   0  270.37   67.49
  16  -5   0  124.59   43.50
  16  -5   0   31.60   40.60
 -16   5   0   77.49   50.69
 -16   5   0  120.29   36.20
  15  -5   0   70.69   39.10
  15  -5   0  -28.20   35.30
  15  -5   0   68.59   34.40
 -15   5   0  -59.89   44.80
  14  -5   0  -47.80   28.50
  14  -5   0  -22.20   33.40
  14  -5   0  -28.70   33.80
 -14   5   0  -22.30   37.70
 -14   5   0  -34.50   30.00
  13  -5   0  -56.99   29.10
  13  -5   0  -36.90   30.30
  13  -5   0  -46.10   25.60
 -13   5   0  -28.00   25.30
 -13   5   0  -40.10   33.30
  12  -5   0  108.39   29.70
  12  -5   0   47.10   28.50
  12  -5   0  133.19   40.60
  12  -5   0  123.19   33.50
  12  -5   0   96.19   32.10
 -12   5   0   90.99   24.30
 -12   5   0  105.99   38.90
  11  -5   0   76.29   38.00
  11  -5   0   28.00   28.30
  11  -5   0  -17.90   23.80
  11  -5   0   63.29   27.70
  11  -5   0   -2.80   23.30
 -11   5   0   18.90   33.60
 -11   5   0    1.40   21.90
  10  -5   0    0.50   23.60
  10  -5   0   40.10   28.10
  10  -5   0    6.10   22.50
  10  -5   0  -17.70   34.60
  10  -5   0   28.00   27.90
 -10   5   0    5.00   21.50
 -10   5   0   -2.40   31.30
   9  -5   0 1066.09   50.69
   9  -5   0 1060.79   53.09
   9  -5   0 1058.19   60.39
   9  -5   0 1090.29   54.69
   9  -5   0 1016.10   65.79
  -9   5   0  994.80   64.39
  -9   5   0  966.90   49.80
   8  -5   0 1941.51   67.89
   8  -5   0 1800.82   71.09
   8  -5   0 1903.61   79.19
   8  -5   0 1959.10   65.79
   8  -5   0 1856.51   68.09
   8  -5   0 1984.20   75.49
  -8   5   0 1948.91   65.99
  -8   5   0 1864.31   78.69
   7  -5   0  296.27   35.20
   7  -5   0  324.17   30.60
   7  -5   0  295.97   32.00
   7  -5   0  264.97   36.60
  -7   5   0  271.67   31.10
  -7   5   0  263.07   38.70
   6  -5   0  190.88   26.20
   6  -5   0  170.68   21.30
   6  -5   0  146.39   19.60
  -6   5   0  149.09   19.80
  -6   5   0  147.79   25.50
   5  -5   0  316.37   43.70
   5  -5   0  329.07   26.60
   5  -5   0  283.77   28.00
   5  -5   0  270.37   29.70
  -5   5   0  319.17   30.50
  -5   5   0  304.27   25.90
  -5   5   0  297.07   26.50
   4  -5   0    4.00   14.90
   4  -5   0   -3.40   14.70
   4  -5   0   -1.60   12.70
   4  -5   0    0.60   22.40
  -4   5   0   -5.60   12.30
  -4   5   0   -4.70   12.70
  -4   5   0   -3.20   14.20
   3  -5   0 1120.69   38.60
   3  -5   0 1092.99   44.60
   3  -5   0 1108.49   39.90
   3  -5   0 1068.59   40.50
  -3   5   0 1088.79   42.40
  -3   5   0 1062.19   38.00
   2  -5   0  241.98   24.60
   2  -5   0  199.48   29.60
   2  -5   0  221.08   22.60
   2  -5   0  238.48   21.00
  -2   5   0  208.18   25.20
  -2   5   0  236.78   19.90
   1  -5   0    8.20   12.30
   1  -5   0  -13.60   27.40
   1  -5   0    8.70   12.70
   1  -5   0   14.10   10.60
  -1   5   0   15.50   10.00
  -1   5   0   -0.70   15.00
  -1   5   0    9.10   13.30
   0  -5   0  689.23   35.60
   0  -5   0  640.74   30.40
   0  -5   0  686.53   32.00
   0  -5   0  626.74   26.30
   0   5   0  645.44   35.50
   0   5   0  673.03   27.20
   0   5   0  646.54   29.30
  -1  -5   0   16.90    9.40
  -1  -5   0   16.60   15.80
  -1  -5   0   31.60   12.70
  -1  -5   0   11.10   14.60
   1   5   0   29.20   10.40
   1   5   0   20.50   16.70
   1   5   0   18.80   12.90
   1   5   0   22.80   15.30
  -2  -5   0  104.89   21.20
  -2  -5   0   91.39   16.10
  -2  -5   0   87.79   18.00
  -2  -5   0   85.79   13.40
   2   5   0   95.89   13.70
   2   5   0   98.69   20.40
   2   5   0   95.19   16.40
   2   5   0  121.79   19.70
  -3  -5   0   -3.00   18.30
  -3  -5   0   26.20   12.40
  -3  -5   0   20.10   17.40
  -3  -5   0   12.60   13.40
   3   5   0  -11.00   20.70
   3   5   0    7.20   12.50
   3   5   0   -4.40   17.00
   3   5   0  -12.00   13.30
  -4  -5   0   -9.00   19.50
  -4  -5   0   23.20   15.50
  -4  -5   0   19.80   21.50
  -4  -5   0   42.20   14.90
   4   5   0   17.30   22.00
   4   5   0   33.20   17.10
   4   5   0   15.90   15.10
   4   5   0   15.70   19.70
  -5  -5   0 2005.10   74.99
  -5  -5   0 2157.28   68.89
  -5  -5   0 2059.19   70.29
  -5  -5   0 2077.79   75.99
   5   5   0 1985.50   75.09
   5   5   0 2158.98   69.89
   5   5   0 2026.90   74.79
   5   5   0 2105.19   68.69
  -6  -5   0  685.03   54.19
  -6  -5   0  755.62   46.70
  -6  -5   0  804.92   48.40
  -6  -5   0  662.13   52.79
   6   5   0  666.33   55.39
   6   5   0  690.13   52.69
   6   5   0  747.03   48.80
   6   5   0  711.23   46.70
  -7  -5   0   15.50   21.40
  -7  -5   0   21.40   23.70
  -7  -5   0  -43.50   32.50
  -7  -5   0  -24.80   27.70
   7   5   0   19.70   21.90
   7   5   0   12.90   29.40
   7   5   0   38.60   33.70
   7   5   0    6.80   22.80
  -8  -5   0  366.06   46.60
  -8  -5   0  376.96   50.69
  -8  -5   0  439.56   47.70
  -8  -5   0  418.16   43.20
   8   5   0  468.45   44.50
   8   5   0  421.66   45.90
   8   5   0  420.16   56.49
   8   5   0  342.57   48.50
  -9  -5   0  -41.60   28.80
  -9  -5   0   45.90   33.00
  -9  -5   0   39.40   26.90
  -9  -5   0   35.30   23.90
   9   5   0    1.60   24.90
   9   5   0   25.30   23.70
   9   5   0    0.20   30.70
   9   5   0   35.50   34.30
 -10  -5   0  753.92   53.39
 -10  -5   0  729.83   60.29
 -10  -5   0  745.63   60.49
 -10  -5   0  769.92   61.69
  10   5   0  813.32   54.99
  10   5   0  774.12   65.09
  10   5   0  773.22   56.89
  10   5   0  787.82   54.89
 -11  -5   0  470.25   59.79
 -11  -5   0  511.85   51.69
 -11  -5   0  429.06   57.69
  11   5   0  559.54   66.99
  11   5   0  448.56   52.29
  11   5   0  406.46   52.69
  11   5   0  427.06   52.59
 -12  -5   0  180.88   45.90
 -12  -5   0  161.48   36.50
 -12  -5   0  122.29   46.20
  12   5   0  192.98   37.40
  12   5   0  144.39   37.00
  12   5   0  212.68   45.30
 -13  -5   0   -8.00   31.50
 -13  -5   0   24.00   43.40
 -13  -5   0   -2.90   47.50
  13   5   0  -17.60   31.90
  13   5   0   16.20   38.20
  13   5   0  -40.10   39.20
 -14  -5   0  232.28   53.19
 -14  -5   0  167.98   41.60
 -14  -5   0  276.17   65.59
  14   5   0  186.08   51.89
  14   5   0  159.48   43.40
 -15  -5   0   90.59   41.10
 -15  -5   0  195.98   55.79
 -15  -5   0   81.69   58.49
  15   5   0  111.59   40.30
  15   5   0  146.59   55.39
 -16  -5   0  -11.40   58.59
 -16  -5   0  -20.50   41.80
 -16  -5   0  -41.50   60.19
  16   5   0  -10.60   49.60
  16   5   0   19.70   44.70
 -17  -5   0    6.10   44.30
 -17  -5   0   39.80   67.99
  17   5   0  -36.40   45.30
  17   5   0  127.59   56.29
 -18  -5   0   22.00   52.39
 -18  -5   0  154.98   87.99
  18   5   0  -29.40   50.69
  18   5   0  136.19   67.09
 -19  -5   0  -15.60   79.29
 -19  -5   0  -50.49   55.79
  19   5   0  156.78   69.19
  19   5   0  -47.50   53.19
 -20  -5   0   18.50   60.69
  20   5   0  121.59   85.59
  20   5   0  224.38   84.39
 -21  -5   0  -47.60   67.69
 -21  -5   0   99.09  103.99
  21   5   0  -67.99   69.59
  21   5   0   61.49   86.49
 -22  -5   0  229.58  122.59
 -22  -5   0  177.88   75.59
  22   5   0  190.98   98.69
  22   5   0   73.39   75.59
 -23  -5   0  -35.00  126.29
 -23  -5   0  178.58   87.49
 -24  -5   0   80.69  143.49
  24   5   0  -43.40   94.29
  27  -6   0  -59.19  102.79
 -27   6   0  236.98  157.68
  26  -6   0   43.90  112.29
 -26   6   0  241.08  145.79
  25  -6   0  -31.60   80.09
 -25   6   0  177.08  120.69
  24  -6   0   29.10   83.99
 -24   6   0   -7.50  100.69
 -24   6   0  185.08   70.89
  23  -6   0  363.66   76.49
  23  -6   0   44.50   72.09
 -23   6   0  200.28   58.39
 -23   6   0   69.19   95.99
  22  -6   0  342.37   71.79
 -22   6   0  129.29   91.99
 -22   6   0  152.18   58.99
  21  -6   0  632.94   79.69
 -21   6   0  580.94  106.99
 -21   6   0  600.94   74.59
  20  -6   0   49.99   54.59
  20  -6   0  119.59   57.89
  20  -6   0   59.09   86.49
 -20   6   0   77.49   72.59
 -20   6   0  138.19   45.00
  19  -6   0  256.67   57.89
  19  -6   0   98.09   65.79
  19  -6   0  162.08   55.49
  19  -6   0  -84.59   75.59
 -19   6   0  121.29   70.99
 -19   6   0  272.27   44.60
  18  -6   0   83.29   53.29
  18  -6   0  245.58   55.19
  18  -6   0  158.88   48.00
  18  -6   0  287.37   61.89
 -18   6   0  248.48   43.60
 -18   6   0  225.78   68.29
  17  -6   0  219.18   53.89
  17  -6   0  164.98   53.29
  17  -6   0  194.58   49.20
  17  -6   0   88.29   46.90
 -17   6   0  166.98   61.89
 -17   6   0  166.18   38.80
  16  -6   0   -4.70   46.60
  16  -6   0   25.40   39.80
  16  -6   0   -7.00   45.30
 -16   6   0  -19.20   30.80
 -16   6   0   -2.70   48.80
  15  -6   0  -22.10   39.80
  15  -6   0  -27.10   33.90
  15  -6   0   22.40   58.39
 -15   6   0  -17.60   44.00
 -15   6   0  -60.09   30.20
  14  -6   0   80.29   36.50
  14  -6   0  114.19   35.90
  14  -6   0   75.29   39.00
  14  -6   0  101.79   39.30
 -14   6   0  125.69   47.10
 -14   6   0  126.49   36.60
  13  -6   0  266.17   37.70
  13  -6   0  293.57   42.80
  13  -6   0  307.87   41.20
  13  -6   0  270.07   38.00
 -13   6   0  307.07   51.59
 -13   6   0  342.37   44.90
  12  -6   0   68.39   32.50
  12  -6   0   31.20   30.00
  12  -6   0   -0.10   27.60
  12  -6   0    4.60   29.70
  12  -6   0   23.80   31.00
  12  -6   0    2.90   38.70
 -12   6   0   25.30   34.40
 -12   6   0   35.40   24.70
  11  -6   0   75.79   39.00
  11  -6   0   22.80   25.50
  11  -6   0   37.80   23.30
  11  -6   0   62.39   32.40
  11  -6   0   66.09   28.80
  11  -6   0   -9.30   23.60
 -11   6   0   20.50   22.10
 -11   6   0   38.70   32.50
  10  -6   0  697.53   54.79
  10  -6   0  664.33   44.70
  10  -6   0  689.43   49.00
  10  -6   0  631.44   47.50
  10  -6   0  627.14   59.19
  10  -6   0  599.14   48.90
 -10   6   0  630.84   43.30
 -10   6   0  576.84   54.49
   9  -6   0 1201.18   58.99
   9  -6   0 1238.58   68.99
   9  -6   0 1314.17   58.79
   9  -6   0 1043.60   89.39
   9  -6   0 1304.57   65.49
   9  -6   0 1321.07   56.89
  -9   6   0 1310.07   70.79
  -9   6   0 1314.07   56.79
   8  -6   0 2471.15   80.79
   8  -6   0 2623.74   81.39
   8  -6   0 2424.26   86.09
   8  -6   0 2439.86   90.29
  -8   6   0 2551.04   80.39
  -8   6   0 2415.96  100.49
   7  -6   0  387.86   37.30
   7  -6   0  357.76   42.10
   7  -6   0  415.36   37.10
   7  -6   0  394.96   40.30
  -7   6   0  368.76   45.50
  -7   6   0  294.27   37.50
   6  -6   0  304.67   35.50
   6  -6   0  286.67   31.90
   6  -6   0  286.77   34.90
   6  -6   0  305.27   32.60
  -6   6   0  285.57   30.90
  -6   6   0  330.17   35.80
   5  -6   0    6.10   18.60
   5  -6   0   -2.70   14.90
   5  -6   0    5.20   14.30
   5  -6   0   -7.10   17.20
  -5   6   0    1.80   17.70
  -5   6   0   -4.30   15.10
  -5   6   0   10.80   15.10
   4  -6   0  802.12   35.10
   4  -6   0  766.92   36.50
   4  -6   0  717.33   43.10
   4  -6   0  789.42   40.00
  -4   6   0  803.92   40.20
  -4   6   0  779.12   35.70
   3  -6   0 1612.64   53.69
   3  -6   0 1709.03   58.19
   3  -6   0 1596.74   53.69
   3  -6   0 1534.15   51.59
   3  -6   0 1639.24   50.59
  -3   6   0 1602.04   57.19
  -3   6   0 1572.44   49.70
   2  -6   0   33.80   16.00
   2  -6   0   33.50   12.30
   2  -6   0   58.89   19.20
   2  -6   0   34.60   15.20
  -2   6   0   45.20   18.50
  -2   6   0   31.30   12.00
   1  -6   0  775.72   36.60
   1  -6   0  782.22   39.30
   1  -6   0  720.43   32.90
   1  -6   0  717.43   29.80
  -1   6   0  759.22   33.20
  -1   6   0  710.73   38.60
  -1   6   0  735.23   30.00
   0  -6   0  881.21   37.10
   0  -6   0  900.61   33.00
   0  -6   0  920.41   44.50
   0  -6   0  974.40   40.70
   0   6   0  916.81   36.50
   0   6   0  908.11   44.30
   0   6   0  950.60   34.30
  -1  -6   0  981.00   40.20
  -1  -6   0  966.70   35.10
  -1  -6   0  974.20   42.70
  -1  -6   0 1029.70   46.80
   1   6   0  987.70   42.00
   1   6   0 1001.20   46.30
   1   6   0  919.51   39.10
   1   6   0  977.20   35.90
  -2  -6   0  407.26   32.20
  -2  -6   0  433.46   36.90
  -2  -6   0  364.46   30.80
   2   6   0  426.76   32.90
   2   6   0  428.86   27.40
   2   6   0  395.76   32.60
   2   6   0  391.96   34.50
  -3  -6   0  -22.70   18.90
  -3  -6   0   -1.90   14.10
  -3  -6   0   -4.90   16.20
  -3  -6   0   30.20   23.30
   3   6   0   14.80   15.20
   3   6   0   23.70   17.20
   3   6   0  -25.40   19.40
   3   6   0   12.70   22.40
  -4  -6   0 1521.65   60.69
  -4  -6   0 1564.94   67.09
  -4  -6   0 1589.04   55.49
  -4  -6   0 1498.05   63.79
   4   6   0 1575.64   57.09
   4   6   0 1524.75   65.99
   4   6   0 1589.54   64.69
   4   6   0 1582.14   60.79
  -5  -6   0  846.22   47.00
  -5  -6   0  932.91   51.49
  -5  -6   0  879.21   56.69
  -5  -6   0  893.11   57.09
   5   6   0  877.21   57.09
   5   6   0  913.81   51.69
   5   6   0  974.30   50.69
   5   6   0  925.11   57.09
  -6  -6   0 1762.02   76.59
  -6  -6   0 1901.51   68.39
  -6  -6   0 1854.11   70.49
  -6  -6   0 1820.52   77.89
   6   6   0 1852.81   70.59
   6   6   0 1885.71   78.39
   6   6   0 1787.42   78.39
   6   6   0 1813.92   69.89
  -7  -6   0  435.46   52.19
  -7  -6   0  520.05   47.00
  -7  -6   0  415.76   60.79
  -7  -6   0  438.16   44.30
   7   6   0  515.55   49.30
   7   6   0  551.64   46.50
   7   6   0  536.15   53.99
   7   6   0  379.26   51.19
  -8  -6   0   42.50   44.50
  -8  -6   0  -45.60   29.10
  -8  -6   0   44.30   31.70
  -8  -6   0   19.90   24.80
   8   6   0    0.00   25.20
   8   6   0  -21.20   28.90
   8   6   0   43.30   37.30
   8   6   0   15.90   24.10
  -9  -6   0  211.98   40.10
  -9  -6   0  182.68   32.70
  -9  -6   0  167.08   39.10
  -9  -6   0  213.48   32.70
   9   6   0  182.98   40.90
   9   6   0  188.68   37.20
   9   6   0   84.49   29.80
   9   6   0  152.78   30.60
 -10  -6   0  267.67   38.20
 -10  -6   0  361.56   55.89
 -10  -6   0  379.76   49.20
 -10  -6   0  344.67   55.59
  10   6   0  364.46   47.80
  10   6   0  430.16   62.79
  10   6   0  333.67   37.90
  10   6   0  352.16   50.19
 -11  -6   0  -49.90   37.60
 -11  -6   0   -4.90   37.90
 -11  -6   0   16.10   29.10
  11   6   0  -27.90   31.10
  11   6   0  -25.80   32.10
  11   6   0  -26.70   28.30
  11   6   0   83.69   46.50
 -12  -6   0  337.67   57.39
 -12  -6   0  339.87   42.40
 -12  -6   0  299.77   52.29
  12   6   0  244.88   41.80
  12   6   0  332.77   52.19
  12   6   0  294.67   44.90
 -13  -6   0  -19.10   45.10
 -13  -6   0   59.59   35.00
 -13  -6   0  -15.30   47.10
  13   6   0   22.50   43.60
  13   6   0   -2.80   35.30
 -14  -6   0  195.38   55.19
 -14  -6   0  277.17   45.80
 -14  -6   0  207.78   61.99
  14   6   0  175.28   46.40
  14   6   0  286.87   54.79
 -15  -6   0   26.10   61.49
 -15  -6   0   61.29   41.40
  15   6   0   67.19   51.99
  15   6   0   34.40   40.60
 -16  -6   0  -10.30   43.70
 -16  -6   0  -37.20   58.59
  16   6   0   42.90   56.19
  16   6   0   14.60   43.80
 -17  -6   0   44.80   71.39
 -17  -6   0   31.20   48.50
  17   6   0  155.48   63.99
  17   6   0   18.30   44.90
 -18  -6   0    8.80   81.39
 -18  -6   0  -44.80   52.59
  18   6   0  -17.20   53.69
  18   6   0  120.29   70.19
 -19  -6   0  311.77  108.29
 -19  -6   0  129.69   62.59
  19   6   0  165.48   61.69
 -20  -6   0  269.77  110.79
 -20  -6   0   35.70   67.09
  20   6   0  -35.60   82.79
  20   6   0  231.18   91.99
 -21  -6   0  -13.10   73.79
 -21  -6   0  -12.40  112.59
  21   6   0  115.29   90.29
  21   6   0  -50.39   72.89
 -22  -6   0   73.69  118.09
 -22  -6   0   13.20   81.99
  22   6   0  -15.50   84.69
  22   6   0  -28.40  106.09
 -23  -6   0  267.17  137.99
 -23  -6   0  163.78  119.19
  23   6   0   78.99   93.79
 -24  -6   0  125.59  174.28
  24   6   0 -122.79   95.99
  27  -7   0   45.30   99.99
 -27   7   0  198.88  142.69
  26  -7   0  -54.49   96.49
 -26   7   0  168.78  135.59
  25  -7   0  177.08   86.79
 -25   7   0  107.49  124.89
  24  -7   0   59.79   74.19
 -24   7   0  -19.80  115.09
 -24   7   0  127.59   67.59
  23  -7   0  -37.30   72.99
  23  -7   0  105.09   69.39
 -23   7   0  -15.80   95.79
 -23   7   0  110.29   64.69
  22  -7   0  413.96   69.59
 -22   7   0  202.68   58.69
 -22   7   0  284.27   93.59
  21  -7   0  275.47   67.69
  21  -7   0   86.99   62.69
 -21   7   0  142.89   85.39
 -21   7   0   96.19   49.90
  20  -7   0  680.33   80.19
 -20   7   0  840.52   74.49
 -20   7   0  718.03  106.39
  19  -7   0   57.99   65.59
  19  -7   0   27.20   53.59
  19  -7   0  107.09   47.20
 -19   7   0  136.09   43.70
 -19   7   0  107.39   66.69
  18  -7   0  279.87   56.89
  18  -7   0  286.37   63.99
  18  -7   0  114.99   55.29
  18  -7   0  299.37   55.79
 -18   7   0  324.47   46.10
 -18   7   0  360.56   67.39
  17  -7   0   26.20   45.10
  17  -7   0   81.99   50.99
  17  -7   0   81.49   51.79
  17  -7   0  -23.20   46.90
 -17   7   0   81.59   36.50
 -17   7   0   41.40   55.69
  16  -7   0  -59.19   46.80
  16  -7   0  -25.40   46.20
  16  -7   0  -14.60   37.30
  16  -7   0  -45.50   44.30
 -16   7   0   16.10   33.20
 -16   7   0  -19.40   48.50
  15  -7   0   27.20   45.10
  15  -7   0  -31.20   32.70
  15  -7   0  -32.20   43.70
  15  -7   0   -2.00   39.70
 -15   7   0  -38.30   45.60
 -15   7   0  -19.20   33.40
  14  -7   0  789.52   65.09
  14  -7   0  744.63   63.19
  14  -7   0  738.83   65.49
 -14   7   0  722.63   73.89
 -14   7   0  722.63   68.19
  13  -7   0  385.46   50.69
  13  -7   0  453.85   56.29
  13  -7   0  396.36   54.49
  13  -7   0  472.75   57.09
 -13   7   0  505.55   63.79
 -13   7   0  458.55   49.20
  12  -7   0 1909.71   78.29
  12  -7   0 1768.92   84.59
  12  -7   0 1814.02   80.19
  12  -7   0 1906.91   74.39
  12  -7   0 1810.42   76.89
  12  -7   0 1739.63   90.59
 -12   7   0 1828.82   88.99
 -12   7   0 1869.21   72.89
  11  -7   0   19.60   26.10
  11  -7   0   14.30   24.50
  11  -7   0   19.80   24.40
  11  -7   0   13.40   36.00
  11  -7   0   24.90   29.90
  11  -7   0   14.30   29.30
 -11   7   0   43.60   24.50
 -11   7   0   21.40   33.70
  10  -7   0   53.39   25.70
  10  -7   0   29.90   28.50
  10  -7   0   23.80   34.00
  10  -7   0   29.90   25.90
  10  -7   0   36.70   29.30
  10  -7   0   26.20   25.80
 -10   7   0   57.89   34.90
 -10   7   0   46.60   23.50
   9  -7   0 1094.29   62.39
   9  -7   0 1129.99   55.39
   9  -7   0 1048.00   56.39
   9  -7   0 1072.39   64.39
  -9   7   0 1131.99   65.09
  -9   7   0 1128.49   54.59
   8  -7   0  573.84   47.20
   8  -7   0  565.24   50.19
   8  -7   0  596.74   45.10
   8  -7   0  490.35   49.70
  -8   7   0  540.45   45.00
   7  -7   0 3421.86  102.69
   7  -7   0 3506.15  101.89
   7  -7   0 3472.05  102.49
   7  -7   0 3464.65  106.99
  -7   7   0 3498.55  101.49
  -7   7   0 3437.36  109.49
   6  -7   0  351.66   39.10
   6  -7   0  286.87   36.90
   6  -7   0  285.37   40.50
   6  -7   0  309.27   39.30
  -6   7   0  363.46   39.50
  -6   7   0  275.27   37.90
   5  -7   0  263.77   31.00
   5  -7   0  259.77   32.50
   5  -7   0  258.67   31.60
   5  -7   0  238.08   32.80
  -5   7   0  220.78   24.20
  -5   7   0  226.88   34.50
   4  -7   0   41.50   15.30
   4  -7   0   41.10   18.80
   4  -7   0   18.70   16.90
   4  -7   0   23.20   21.10
  -4   7   0   34.50   16.30
  -4   7   0   31.40   20.00
   3  -7   0   64.39   18.80
   3  -7   0   28.20   21.00
   3  -7   0   60.99   27.90
   3  -7   0   34.10   17.60
  -3   7   0   23.80   20.10
  -3   7   0   55.79   15.20
   2  -7   0 1174.78   47.70
   2  -7   0 1133.69   41.20
   2  -7   0 1122.79   43.60
   2  -7   0 1139.89   50.99
  -2   7   0 1092.09   40.50
  -2   7   0 1089.19   50.29
   1  -7   0   98.19   15.10
   1  -7   0  119.89   21.20
   1  -7   0  104.99   20.10
   1  -7   0  128.29   24.80
  -1   7   0  103.49   24.10
  -1   7   0  113.49   21.80
  -1   7   0  100.59   15.90
   0  -7   0 4493.75  111.19
   0  -7   0 4737.83  127.29
   0  -7   0 4327.67  115.79
   0  -7   0 4538.15  121.89
   0   7   0 4499.85  126.09
   0   7   0 4431.66  115.39
   0   7   0 4528.05  112.79
  -1  -7   0 4442.86  123.69
  -1  -7   0 4343.47  117.89
  -1  -7   0 4150.28  112.99
   1   7   0 4200.28  112.99
   1   7   0 4319.27  123.69
   1   7   0 4460.75  117.39
   1   7   0 4181.18  108.59
  -2  -7   0   96.69   17.20
  -2  -7   0   89.09   22.00
  -2  -7   0   81.49   28.30
  -2  -7   0   66.99   25.30
   2   7   0   97.99   22.60
   2   7   0  110.49   19.30
   2   7   0   72.39   27.10
   2   7   0   98.69   26.80
  -3  -7   0   50.49   27.30
  -3  -7   0   79.39   30.20
  -3  -7   0   56.89   19.60
  -3  -7   0   64.59   23.00
   3   7   0   33.30   29.00
   3   7   0   93.99   24.60
   3   7   0   89.69   21.00
   3   7   0  128.79   30.10
  -4  -7   0  152.38   28.30
  -4  -7   0  128.19   22.50
  -4  -7   0  139.69   34.40
  -4  -7   0  132.69   36.40
   4   7   0  162.68   24.80
   4   7   0  160.68   34.50
   4   7   0  160.88   28.00
   4   7   0   93.79   41.80
  -5  -7   0  317.97   49.60
  -5  -7   0  328.87   40.30
  -5  -7   0  372.26   44.40
  -5  -7   0  273.57   35.90
   5   7   0  376.56   40.80
   5   7   0  296.37   46.60
   5   7   0  352.16   42.50
   5   7   0  398.66   49.70
  -6  -7   0  453.65   51.39
  -6  -7   0  389.96   52.99
  -6  -7   0  462.65   50.89
  -6  -7   0  468.65   42.90
   6   7   0  400.96   51.49
   6   7   0  450.55   41.90
   6   7   0  503.95   47.10
   6   7   0  414.66   49.80
  -7  -7   0  135.79   28.50
  -7  -7   0  139.29   36.10
  -7  -7   0  103.29   26.60
  -7  -7   0  109.69   35.30
   7   7   0  128.89   38.60
   7   7   0  127.29   33.00
   7   7   0   79.29   28.20
   7   7   0  128.89   35.20
  -8  -7   0 1708.83   75.19
  -8  -7   0 1901.61   80.29
  -8  -7   0 1825.22   74.69
  -8  -7   0 1788.82   81.89
   8   7   0 1713.13   72.99
   8   7   0 1818.22   80.39
   8   7   0 1837.22   83.49
   8   7   0 1747.73   75.89
  -9  -7   0  360.16   47.10
  -9  -7   0  268.97   46.10
  -9  -7   0  254.87   46.90
  -9  -7   0  216.38   35.30
   9   7   0  246.48   35.20
   9   7   0  273.67   36.10
   9   7   0  291.07   47.50
   9   7   0  330.47   45.30
 -10  -7   0   -9.40   28.50
 -10  -7   0   27.10   31.50
 -10  -7   0   13.60   38.00
 -10  -7   0  -19.50   34.50
  10   7   0    9.80   32.00
  10   7   0   39.30   44.90
  10   7   0   10.00   33.70
  10   7   0    7.30   28.70
 -11  -7   0  -21.40   29.50
 -11  -7   0   63.59   43.90
 -11  -7   0  -18.80   41.30
  11   7   0   20.60   56.39
  11   7   0  -17.80   36.70
  11   7   0    3.30   39.20
  11   7   0    4.20   29.90
 -12  -7   0   61.29   33.80
 -12  -7   0   69.79   47.40
 -12  -7   0   54.79   46.30
  12   7   0   92.79   37.40
  12   7   0   42.10   44.70
 -13  -7   0  333.97   47.20
 -13  -7   0  276.47   58.09
 -13  -7   0  353.66   67.49
  13   7   0  336.07   48.20
  13   7   0  409.46   62.09
 -14  -7   0   54.39   40.40
 -14  -7   0   67.49   58.29
  14   7   0   43.10   51.29
  14   7   0   93.79   44.10
 -15  -7   0  723.83   73.49
 -15  -7   0  781.82   96.89
  15   7   0  800.82   79.79
  15   7   0  835.02   86.79
 -16  -7   0   32.00   47.20
 -16  -7   0  103.79   75.89
  16   7   0   60.59   49.30
  16   7   0   96.19   63.79
 -17  -7   0    5.00   50.09
 -17  -7   0   16.10   78.39
  17   7   0  -69.59   49.90
  17   7   0   86.79   70.89
 -18  -7   0  170.88   88.39
 -18  -7   0  237.98   60.79
  18   7   0   97.79   59.39
  18   7   0  436.76   84.49
 -19  -7   0  223.08   64.69
 -19  -7   0  168.38   96.29
  19   7   0  128.39   69.19
  19   7   0  349.17   85.49
 -20  -7   0  210.78  115.49
 -20  -7   0  -20.10   68.59
  20   7   0   87.69   99.19
  20   7   0   80.49   68.19
 -21  -7   0   24.90   76.69
 -21  -7   0  338.07  123.99
  21   7   0  160.38   76.89
  21   7   0   75.09  106.09
 -22  -7   0  109.99   84.29
 -22  -7   0   24.30  124.59
  22   7   0   16.70  123.99
  22   7   0 -172.98   83.39
 -23  -7   0   87.29  158.28
  23   7   0 -209.08   99.59
  27  -8   0   -7.70  103.49
 -27   8   0  136.89  149.39
  26  -8   0   71.19   88.29
 -26   8   0  250.77  159.68
  25  -8   0  -36.00   94.69
 -25   8   0  117.29  127.99
  24  -8   0   -6.80   74.39
 -24   8   0  132.79   76.39
 -24   8   0   76.49  101.79
  23  -8   0   89.89   79.29
  23  -8   0  152.08   70.29
 -23   8   0   34.30   95.59
 -23   8   0   63.09   60.89
  22  -8   0   -0.20   65.39
 -22   8   0  103.69   57.79
 -22   8   0   22.10   86.99
  21  -8   0   97.59   56.49
  21  -8   0   44.80   62.89
 -21   8   0  181.28   53.39
 -21   8   0   70.59   83.69
  20  -8   0   15.50   59.39
  20  -8   0   26.60   56.29
 -20   8   0   24.00   44.50
 -20   8   0   50.79   67.29
  19  -8   0  229.68   57.59
  19  -8   0  233.18   71.29
  19  -8   0  251.97   60.09
 -19   8   0  258.17   78.69
 -19   8   0  347.17   51.09
  18  -8   0  -12.60   50.49
  18  -8   0   37.70   59.89
  18  -8   0  -84.59   87.09
  18  -8   0   56.39   46.90
 -18   8   0  123.69   66.99
 -18   8   0   50.09   39.80
  17  -8   0   57.29   54.79
  17  -8   0   -8.40   49.50
  17  -8   0   29.20   50.39
  17  -8   0    6.70   39.00
 -17   8   0  -60.39   52.59
 -17   8   0   23.70   35.90
  16  -8   0  505.85   57.49
  16  -8   0  661.23   75.99
  16  -8   0  682.33   72.49
  16  -8   0  690.43   74.59
 -16   8   0  679.93   82.49
 -16   8   0  749.42   60.49
  15  -8   0    9.90   42.00
  15  -8   0   49.90   42.20
  15  -8   0  -42.50   33.20
  15  -8   0  -49.30   42.00
 -15   8   0  -39.70   45.90
 -15   8   0    9.30   31.90
  14  -8   0   47.40   31.90
  14  -8   0   35.60   40.70
  14  -8   0   79.99   36.90
  14  -8   0   95.99   40.60
 -14   8   0    5.90   40.80
 -14   8   0   35.10   29.30
  13  -8   0 2518.15  107.69
  13  -8   0 2830.02  100.09
  13  -8   0 2739.43   99.19
  13  -8   0 2578.54  101.89
 -13   8   0 2493.25   98.09
 -13   8   0 2649.63  113.69
  12  -8   0   30.00   33.70
  12  -8   0    1.40   29.40
  12  -8   0   35.40   33.50
  12  -8   0   53.09   29.40
  12  -8   0   12.20   57.89
  12  -8   0   37.60   42.20
 -12   8   0   24.80   33.90
 -12   8   0   32.20   33.40
  11  -8   0   40.00   30.00
  11  -8   0   60.49   30.20
  11  -8   0   29.50   31.60
  11  -8   0    2.20   37.00
  11  -8   0   54.99   28.30
  11  -8   0    4.10   24.70
 -11   8   0    7.00   30.70
 -11   8   0    9.30   25.30
  10  -8   0    9.10   26.20
  10  -8   0   27.30   33.50
  10  -8   0   32.40   30.30
  10  -8   0   39.50   27.10
  10  -8   0   43.80   27.40
 -10   8   0   34.70   31.20
 -10   8   0    6.80   24.00
   9  -8   0  210.58   31.80
   9  -8   0  178.58   30.80
   9  -8   0  218.88   40.70
   9  -8   0  184.28   32.40
  -9   8   0  224.48   39.70
  -9   8   0  208.78   29.60
   8  -8   0  818.52   50.89
   8  -8   0  786.42   54.99
   8  -8   0  715.43   50.39
   8  -8   0  769.22   50.49
  -8   8   0  729.03   49.40
  -8   8   0  705.53   56.19
   7  -8   0  325.57   44.50
   7  -8   0  293.47   32.60
   7  -8   0  331.87   42.60
   7  -8   0  372.46   47.40
  -7   8   0  404.16   47.10
  -7   8   0  309.67   42.40
   6  -8   0 3782.52  110.29
   6  -8   0 3734.43  106.99
   6  -8   0 3852.01  112.59
   6  -8   0 3778.32  112.59
  -6   8   0 3771.32  109.09
  -6   8   0 3789.42  114.99
   5  -8   0 1577.64   67.59
   5  -8   0 1635.74   60.49
   5  -8   0 1576.24   63.39
   5  -8   0 1537.15   62.89
  -5   8   0 1599.84   60.99
  -5   8   0 1624.04   68.19
   4  -8   0  239.68   33.70
   4  -8   0  240.18   33.50
   4  -8   0  245.48   33.50
   4  -8   0  245.78   33.00
   4  -8   0  255.47   29.30
  -4   8   0  273.07   35.40
  -4   8   0  248.08   24.90
   3  -8   0 2730.33   78.79
   3  -8   0 2778.22   91.79
   3  -8   0 2693.83   82.89
   3  -8   0 2722.23   85.89
  -3   8   0 2679.93   77.59
  -3   8   0 2677.93   90.99
   2  -8   0  158.78   24.00
   2  -8   0  230.18   28.50
   2  -8   0  214.08   32.80
   2  -8   0  224.68   27.30
  -2   8   0  189.88   32.90
  -2   8   0  211.68   29.20
   1  -8   0  106.59   26.60
   1  -8   0   51.89   22.90
   1  -8   0  105.99   31.80
   1  -8   0  101.09   29.40
  -1   8   0  109.99   28.80
  -1   8   0  104.29   19.40
   0  -8   0 5043.20  137.59
   0  -8   0 4937.21  131.49
   0  -8   0 5200.18  143.39
   0  -8   0 4945.51  126.49
   0   8   0 5028.70  142.89
   0   8   0 5016.10  126.99
  -1  -8   0  724.53   37.70
  -1  -8   0  768.62   47.90
  -1  -8   0  594.34   48.00
  -1  -8   0  707.93   54.69
   1   8   0  732.53   40.70
   1   8   0  745.33   46.50
   1   8   0  607.34   65.69
  -2  -8   0 1322.67   50.39
  -2  -8   0 1339.97   61.69
  -2  -8   0 1282.97   67.89
  -2  -8   0 1318.87   59.29
   2   8   0 1130.19   77.09
   2   8   0 1349.56   52.39
   2   8   0 1389.26   63.09
   2   8   0 1329.37   58.99
  -3  -8   0  -10.30   29.50
  -3  -8   0  -11.20   27.20
  -3  -8   0    2.60   18.10
  -3  -8   0   36.80   23.80
   3   8   0   52.19   30.40
   3   8   0    5.90   23.90
   3   8   0  -25.40   29.80
   3   8   0   33.40   20.40
  -4  -8   0  331.97   51.99
  -4  -8   0  297.57   43.10
  -4  -8   0  272.37   37.00
  -4  -8   0  319.47   58.19
   4   8   0  365.06   47.30
   4   8   0  325.37   42.80
   4   8   0  297.27   33.60
   4   8   0  383.66   38.90
  -5  -8   0  438.46   39.60
  -5  -8   0  419.56   53.99
  -5  -8   0  374.56   43.40
  -5  -8   0  310.47   46.00
   5   8   0  387.16   47.50
   5   8   0  360.66   40.50
   5   8   0  327.97   36.00
   5   8   0  372.56   51.29
  -6  -8   0   -7.80   22.50
  -6  -8   0    1.10   30.30
  -6  -8   0   -4.00   23.50
   6   8   0   -0.30   23.00
   6   8   0  -52.39   25.40
   6   8   0    2.90   33.20
   6   8   0  -17.10   27.00
  -7  -8   0 1980.60   78.19
  -7  -8   0 2242.08   88.29
  -7  -8   0 2068.89   86.49
  -7  -8   0 2169.68   81.99
   7   8   0 2187.88   90.49
   7   8   0 2090.49   83.09
   7   8   0 2164.48   79.89
   7   8   0 2132.39   88.79
  -8  -8   0  384.76   46.20
  -8  -8   0  366.66   52.39
  -8  -8   0  389.46   50.69
  -8  -8   0  402.66   57.29
   8   8   0  441.86   45.40
   8   8   0  418.36   61.79
   8   8   0  333.37   38.30
   8   8   0  375.26   51.69
  -9  -8   0   84.39   40.40
  -9  -8   0   20.30   28.90
  -9  -8   0  171.28   42.60
  -9  -8   0   60.59   30.90
   9   8   0   75.69   29.10
   9   8   0   83.09   41.50
   9   8   0  128.49   39.40
   9   8   0   95.39   33.70
 -10  -8   0    6.40   29.10
 -10  -8   0   13.10   40.70
 -10  -8   0   10.90   39.50
 -10  -8   0  -62.09   41.40
  10   8   0   25.50   39.40
  10   8   0   50.39   46.00
  10   8   0  -16.20   27.70
 -11  -8   0   41.70   44.20
 -11  -8   0   52.49   35.30
 -11  -8   0   63.99   45.70
  11   8   0   17.30   40.70
  11   8   0   92.49   36.10
 -12  -8   0  775.32   66.99
 -12  -8   0  582.94   79.69
  12   8   0  684.13   68.79
  12   8   0  653.43   71.89
 -13  -8   0   -5.30   36.20
 -13  -8   0   51.19   55.69
  13   8   0   46.00   50.99
  13   8   0   10.70   37.40
 -14  -8   0  713.83   88.79
 -14  -8   0  645.94   73.29
  14   8   0  690.63   74.59
  14   8   0  667.33   81.49
 -15  -8   0  646.94   95.29
 -15  -8   0  722.33   76.39
  15   8   0  856.81   88.59
  15   8   0  768.42   82.89
 -16  -8   0  -11.30   68.09
 -16  -8   0  -41.10   48.30
  16   8   0   18.10   47.80
  16   8   0  180.68   68.59
 -17  -8   0  -37.80   52.19
 -17  -8   0   81.09   79.89
  17   8   0  157.88   72.49
  17   8   0   25.30   51.99
 -18  -8   0   96.89   94.49
 -18  -8   0  -87.19   53.79
  18   8   0   65.89   78.99
  18   8   0    7.50   63.39
 -19  -8   0 -124.39   60.79
  19   8   0  -27.40   71.99
  19   8   0  -26.60   89.39
 -20  -8   0  137.39   74.29
 -20  -8   0   34.10  109.79
  20   8   0  -44.00   91.29
  20   8   0   58.69   73.09
 -21  -8   0  -58.69   77.89
 -21  -8   0  157.78  123.29
  21   8   0  -73.59   77.59
  21   8   0   93.79  110.49
 -22  -8   0  159.28   91.79
 -22  -8   0 -112.39  144.99
  22   8   0 -164.18   85.09
 -23  -8   0  187.28  175.08
  23   8   0   46.90  102.09
  27  -9   0   62.79  110.79
 -27   9   0 -137.69  150.98
  26  -9   0  -37.40   86.59
 -26   9   0  -33.80  127.39
  25  -9   0  112.49   99.49
 -25   9   0  -71.09  120.29
  24  -9   0   29.50   77.89
 -24   9   0   -0.70  108.99
 -24   9   0  278.97   73.99
  23  -9   0    4.00   70.99
  23  -9   0   -0.10   72.89
 -23   9   0   82.09   65.59
 -23   9   0  -14.10   95.09
  22  -9   0   67.49   69.39
 -22   9   0  -18.40   87.69
 -22   9   0   61.99   60.39
  21  -9   0   46.60   60.69
  21  -9   0   14.80   64.69
 -21   9   0  -14.60   52.69
 -21   9   0   24.70   78.59
  20  -9   0 -100.89   58.29
  20  -9   0  -22.20   52.99
 -20   9   0   -8.40   42.70
 -20   9   0   -5.90   71.29
  19  -9   0  -94.29   72.59
  19  -9   0  -31.90   49.60
  19  -9   0  -72.49   56.09
 -19   9   0   99.49   69.39
 -19   9   0   37.40   44.60
  18  -9   0  -19.10   62.79
  18  -9   0   -9.90   53.79
  18  -9   0   27.70   46.40
 -18   9   0   57.69   40.70
 -18   9   0    6.00   61.39
  17  -9   0   77.89   44.50
  17  -9   0  195.28   59.89
  17  -9   0   21.80   51.59
  17  -9   0   79.89   65.79
 -17   9   0   86.89   37.80
 -17   9   0   46.10   58.19
  16  -9   0   88.09   52.49
  16  -9   0   19.90   39.80
  16  -9   0   29.70   48.20
  16  -9   0  -41.40   46.30
 -16   9   0  115.29   37.60
 -16   9   0  108.49   54.89
  15  -9   0  235.88   50.69
  15  -9   0  228.28   45.00
  15  -9   0  183.78   46.90
  15  -9   0  308.07   53.89
 -15   9   0  249.97   57.49
 -15   9   0  267.37   39.70
  14  -9   0  143.39   43.20
  14  -9   0  284.67   50.39
  14  -9   0  297.67   49.99
  14  -9   0  201.78   40.40
 -14   9   0  222.08   52.39
 -14   9   0  247.28   38.30
  13  -9   0   17.40   30.30
  13  -9   0   27.80   38.50
  13  -9   0   58.29   39.20
  13  -9   0  -12.60   34.60
 -13   9   0   38.80   30.20
 -13   9   0   58.29   39.60
  12  -9   0  -72.69   30.30
  12  -9   0  -11.50   42.70
  12  -9   0  -28.30   38.00
  12  -9   0   -3.30   34.40
  12  -9   0    8.20   27.60
  12  -9   0  -23.70   32.00
 -12   9   0  -32.10   33.80
 -12   9   0  -11.00   26.90
  11  -9   0   98.39   32.30
  11  -9   0   73.39   33.20
  11  -9   0  129.19   36.70
  11  -9   0  132.29   37.50
  11  -9   0   88.19   28.00
  11  -9   0   92.99   44.00
 -11   9   0  118.29   33.10
 -11   9   0  110.59   40.50
  10  -9   0  162.48   35.90
  10  -9   0  211.08   43.80
  10  -9   0  102.89   30.20
  10  -9   0  152.28   31.70
 -10   9   0   98.79   35.20
 -10   9   0  110.89   35.40
   9  -9   0  319.77   43.40
   9  -9   0  261.47   34.70
   9  -9   0  269.57   36.90
   9  -9   0  244.68   33.90
  -9   9   0  228.78   32.20
  -9   9   0  273.47   41.10
   8  -9   0  386.06   45.90
   8  -9   0  379.46   46.30
   8  -9   0  391.96   45.80
   8  -9   0  397.06   47.90
  -8   9   0  328.67   36.80
   7  -9   0 1296.87   64.79
   7  -9   0 1425.96   62.89
   7  -9   0 1249.68   64.69
   7  -9   0 1286.37   63.79
  -7   9   0 1284.17   85.29
   6  -9   0 2275.77   81.99
   6  -9   0 2457.95   79.59
   6  -9   0 2313.27   82.49
   6  -9   0 2381.76   87.89
  -6   9   0 2272.67  102.79
  -6   9   0 2262.57   78.99
   5  -9   0  611.04   49.60
   5  -9   0  690.63   44.20
   5  -9   0  622.44   49.80
   5  -9   0  664.13   54.99
   5  -9   0  668.23   46.00
  -5   9   0  622.14   65.89
  -5   9   0  652.03   45.50
   4  -9   0 1020.30   54.69
   4  -9   0  947.01   55.49
   4  -9   0 1039.70   51.89
   4  -9   0  983.50   61.19
   4  -9   0 1056.69   49.30
  -4   9   0  992.70   48.60
  -4   9   0  739.33   92.99
   3  -9   0   45.10   26.90
   3  -9   0    5.70   23.70
   3  -9   0  -28.70   28.20
   3  -9   0  -31.00   24.10
   3  -9   0   33.60   20.90
  -3   9   0  -18.00   18.90
   2  -9   0  463.15   50.59
   2  -9   0  483.65   37.80
   2  -9   0  508.95   47.60
   2  -9   0  534.85   43.40
  -2   9   0  453.95   37.60
  -2   9   0  417.86   51.79
   1  -9   0   10.40   17.90
   1  -9   0  -17.00   23.00
   1  -9   0   75.49   28.40
   1  -9   0  -12.50   28.40
  -1   9   0  -26.30   19.10
  -1   9   0  -34.80   24.80
  -1   9   0  -39.80   28.10
   0  -9   0  178.88   31.10
   0  -9   0  106.49   20.00
   0  -9   0   91.89   33.30
   0  -9   0   94.39   27.60
   0   9   0  138.59   29.20
   0   9   0  121.49   23.00
   0   9   0   80.69   32.80
  -1  -9   0 2946.41  126.89
  -1  -9   0 3210.38   87.79
  -1  -9   0 3161.18   96.39
  -1  -9   0 3175.68  108.29
   1   9   0 3152.28   90.09
   1   9   0 3206.78  108.49
   1   9   0 3126.29   95.29
  -2  -9   0    8.90   25.00
  -2  -9   0  -24.10   30.30
  -2  -9   0   16.30   18.50
  -2  -9   0   13.60   27.90
   2   9   0   25.10   20.50
   2   9   0   51.29   29.70
   2   9   0  -20.60   30.50
  -3  -9   0   19.50   32.90
  -3  -9   0   34.80   19.80
  -3  -9   0   74.29   25.90
  -3  -9   0   27.40   28.40
   3   9   0   15.60   25.90
   3   9   0   66.89   30.20
   3   9   0   62.89   22.50
   3   9   0   41.50   31.20
  -4  -9   0  306.57   35.80
  -4  -9   0  415.06   54.69
  -4  -9   0  364.66   35.60
  -4  -9   0  332.97   45.10
   4   9   0  370.16   46.00
   4   9   0  347.07   36.70
   4   9   0  368.76   39.80
   4   9   0  342.77   48.30
  -5  -9   0   31.80   33.80
  -5  -9   0   26.60   23.60
  -5  -9   0    6.80   21.20
  -5  -9   0   -9.10   31.30
   5   9   0  -30.80   32.40
   5   9   0   10.70   22.60
   5   9   0   32.70   26.30
   5   9   0  -58.79   26.20
  -6  -9   0  629.14   54.19
  -6  -9   0  599.04   60.19
  -6  -9   0  553.14   49.00
  -6  -9   0  580.94   49.40
   6   9   0  475.55   63.79
   6   9   0  537.05   53.59
   6   9   0  534.25   54.09
   6   9   0  667.83   60.99
  -7  -9   0  202.48   33.20
  -7  -9   0  145.29   38.80
  -7  -9   0  168.28   39.90
  -7  -9   0  135.89   29.40
   7   9   0  151.18   30.90
   7   9   0  254.47   46.10
   7   9   0  167.58   39.20
   7   9   0  200.98   35.10
  -8  -9   0  284.57   49.10
  -8  -9   0  205.48   36.60
  -8  -9   0  264.07   44.60
  -8  -9   0  235.88   34.10
   8   9   0  204.98   33.80
   8   9   0  287.77   49.80
   8   9   0  341.77   49.30
  -9  -9   0   -2.50   30.30
  -9  -9   0   28.50   40.20
  -9  -9   0  -28.20   31.60
  -9  -9   0   97.69   44.40
   9   9   0   -1.60   28.40
   9   9   0   26.00   39.20
   9   9   0   57.99   44.90
 -10  -9   0   25.20   31.20
 -10  -9   0   11.30   43.70
  10   9   0   33.50   49.80
  10   9   0   36.90   42.90
  10   9   0   29.50   32.00
 -11  -9   0 1300.47   75.99
 -11  -9   0 1266.97   86.89
  11   9   0 1252.57   76.89
  11   9   0 1250.77   86.99
 -12  -9   0  222.68   45.40
 -12  -9   0  285.37   63.09
  12   9   0  266.87   44.60
  12   9   0  260.57   58.39
 -13  -9   0   88.19   58.19
 -13  -9   0   28.60   41.80
  13   9   0   58.89   53.89
  13   9   0    4.90   39.60
 -14  -9   0  517.55   82.79
 -14  -9   0  384.76   55.59
  14   9   0  552.74   76.79
  14   9   0  604.44   84.59
 -15  -9   0    0.90   46.70
 -15  -9   0   55.09   74.49
  15   9   0   98.59   65.39
  15   9   0   62.79   51.69
 -16  -9   0   58.29   77.09
 -16  -9   0  -39.80   50.49
  16   9   0   19.60   50.09
  16   9   0  108.19   71.19
 -17  -9   0   -7.60   85.59
  17   9   0  -60.69   53.19
  17   9   0  -18.20   75.49
 -18  -9   0   95.59  102.19
 -18  -9   0  -85.09   60.09
  18   9   0  -26.30   60.69
  18   9   0  -55.69   87.99
 -19  -9   0  -11.60   69.49
 -19  -9   0   75.39  111.09
  19   9   0  186.28   97.49
  19   9   0  -57.29   91.39
 -20  -9   0 -186.38   73.29
 -20  -9   0  213.08  118.09
  20   9   0  -59.19   72.19
  20   9   0  177.98  103.49
 -21  -9   0  -13.90   81.19
 -21  -9   0   -9.00  120.99
  21   9   0  298.97  133.39
  21   9   0   -0.60   83.59
 -22  -9   0  -19.60   97.59
 -22  -9   0  142.99  158.08
  22   9   0   16.80   97.99
  27 -10   0   44.00  108.39
 -27  10   0   32.60  143.69
  26 -10   0   32.30   91.39
 -26  10   0   99.19  157.98
  25 -10   0   92.09  103.29
 -25  10   0  134.29  113.69
  24 -10   0  124.79   79.09
 -24  10   0  107.79  108.29
 -24  10   0  295.37   76.59
  23 -10   0  -25.10   70.49
  23 -10   0  -28.60   73.39
 -23  10   0   16.40   91.89
 -23  10   0  117.39   67.89
  22 -10   0    1.40   70.69
 -22  10   0  -19.20   89.79
 -22  10   0   62.29   59.59
  21 -10   0    5.80   65.69
  21 -10   0  151.78   65.69
 -21  10   0  247.08   90.99
 -21  10   0  129.39   54.19
  20 -10   0   37.40   55.79
  20 -10   0 -116.29   60.29
 -20  10   0   95.79   52.09
 -20  10   0   55.69   68.99
  19 -10   0  166.98   81.79
  19 -10   0   28.00   53.89
  19 -10   0   80.09   63.69
 -19  10   0   80.49   45.90
 -19  10   0   29.80   64.59
  18 -10   0  112.99   71.79
  18 -10   0   82.09   52.89
  18 -10   0   -9.20   57.29
 -18  10   0  117.49   43.10
 -18  10   0   69.29   62.79
  17 -10   0   17.00   44.60
  17 -10   0  107.89   64.49
  17 -10   0   43.90   52.89
 -17  10   0   66.89   57.29
 -17  10   0   51.19   40.20
  16 -10   0  157.58   59.99
  16 -10   0  173.88   53.59
  16 -10   0  149.69   47.50
 -16  10   0  132.99   58.19
 -16  10   0  201.48   42.90
  15 -10   0   -6.30   45.50
  15 -10   0  -22.70   38.40
  15 -10   0   42.20   47.20
  15 -10   0   36.30   48.50
 -15  10   0    6.60   34.90
 -15  10   0  -43.70   47.50
  14 -10   0    9.40   32.80
  14 -10   0   -4.30   44.30
  14 -10   0   20.40   41.10
  14 -10   0   66.39   42.20
 -14  10   0    0.30   31.50
 -14  10   0   12.10   46.50
  13 -10   0  104.29   40.50
  13 -10   0   35.20   31.50
  13 -10   0  100.99   43.50
  13 -10   0   26.60   38.90
 -13  10   0  109.29   43.90
 -13  10   0   68.89   32.40
  12 -10   0   68.39   37.90
  12 -10   0   83.29   45.90
  12 -10   0   51.59   34.60
  12 -10   0   82.39   30.90
  12 -10   0    7.70   38.00
  12 -10   0   73.59   39.50
 -12  10   0   49.10   38.00
 -12  10   0   54.39   29.10
  11 -10   0  296.17   51.59
  11 -10   0  269.27   45.20
  11 -10   0  221.08   36.20
  11 -10   0  234.58   36.10
 -11  10   0  233.88   44.30
 -11  10   0  267.97   35.90
  10 -10   0 1758.62   78.49
  10 -10   0 1639.14   77.89
  10 -10   0 1673.23   83.49
  10 -10   0 1648.44   74.49
 -10  10   0 1743.83   73.09
   9 -10   0  392.06   50.29
   9 -10   0  330.17   41.20
   9 -10   0  311.47   37.10
   9 -10   0  330.47   45.20
   8 -10   0  172.38   30.00
   8 -10   0  184.88   35.50
   8 -10   0  102.89   29.60
   8 -10   0  185.18   36.60
  -8  10   0  169.18   35.70
   7 -10   0  337.57   42.80
   7 -10   0  386.06   46.10
   7 -10   0  418.86   45.10
   7 -10   0  391.86   46.30
  -7  10   0  319.87   43.80
  -7  10   0  409.06   47.50
   6 -10   0  321.27   46.80
   6 -10   0  421.06   42.70
   6 -10   0  383.26   50.09
   6 -10   0  376.96   44.40
   6 -10   0  351.06   44.70
  -6  10   0  312.77   40.60
  -6  10   0  309.57   48.60
   5 -10   0  449.56   45.10
   5 -10   0  543.45   43.20
   5 -10   0  452.35   52.09
   5 -10   0  498.15   48.80
   5 -10   0  455.15   46.70
  -5  10   0  450.35   50.39
  -5  10   0  521.95   41.90
   4 -10   0  -20.50   31.10
   4 -10   0   20.20   21.20
   4 -10   0   20.70   24.80
   4 -10   0   13.60   27.40
  -4  10   0  -46.50   27.00
  -4  10   0    7.00   21.10
   3 -10   0  -24.00   31.20
   3 -10   0   17.00   26.30
   3 -10   0   -8.60   25.40
   3 -10   0    1.90   19.10
   3 -10   0   15.00   26.90
  -3  10   0   -3.40   19.20
  -3  10   0   24.20   30.00
   2 -10   0    2.60   17.60
   2 -10   0   33.40   28.20
   2 -10   0    9.80   24.40
   2 -10   0  -11.50   30.30
  -2  10   0  -29.40   28.30
  -2  10   0   -8.70   18.90
   1 -10   0   12.00   17.00
   1 -10   0   34.00   28.50
   1 -10   0  -27.00   23.70
   1 -10   0   -9.90   30.20
  -1  10   0    5.00   19.10
  -1  10   0  -42.90   26.90
  -1  10   0   -3.80   25.80
   0 -10   0  527.55   55.99
   0 -10   0  634.24   37.10
   0 -10   0  576.64   49.70
   0 -10   0  647.64   48.20
   0  10   0  609.74   41.30
   0  10   0  570.64   46.10
   0  10   0  548.95   52.79
  -1 -10   0  -14.00   22.90
  -1 -10   0    1.50   17.80
  -1 -10   0   29.80   31.00
  -1 -10   0  -16.90   27.20
   1  10   0    7.80   20.20
   1  10   0   21.50   27.40
   1  10   0    0.20   29.60
  -2 -10   0   57.39   25.20
  -2 -10   0   84.69   34.40
  -2 -10   0  102.49   30.60
  -2 -10   0   66.39   18.80
   2  10   0  113.79   32.40
   2  10   0  100.59   23.10
   2  10   0   19.00   32.40
  -3 -10   0   56.79   30.60
  -3 -10   0   -8.30   30.60
  -3 -10   0   17.30   17.90
  -3 -10   0   65.09   25.50
   3  10   0   51.19   22.90
   3  10   0   -3.90   29.60
   3  10   0   33.20   31.20
   3  10   0    0.80   26.60
  -4 -10   0   14.30   33.80
  -4 -10   0    1.60   24.70
  -4 -10   0   15.80   21.70
  -4 -10   0   -0.20   29.10
   4  10   0  -47.40   30.40
   4  10   0  -13.50   23.00
   4  10   0  -12.60   29.40
   4  10   0   -6.50   27.10
  -5 -10   0  986.30   75.79
  -5 -10   0  996.60   54.69
  -5 -10   0 1018.50   58.59
  -5 -10   0 1085.79   70.79
   5  10   0  965.10   66.59
   5  10   0 1000.30   66.09
   5  10   0 1036.50   56.49
   5  10   0  923.21   62.39
  -6 -10   0  292.77   43.60
  -6 -10   0  280.37   44.50
  -6 -10   0  192.88   32.20
  -6 -10   0  259.07   36.00
   6  10   0  235.48   46.70
   6  10   0  216.38   32.20
   6  10   0  242.18   46.20
  -7 -10   0  187.28   45.80
  -7 -10   0  186.78   43.00
  -7 -10   0  122.09   31.80
  -7 -10   0  130.89   32.00
   7  10   0  127.99   31.10
   7  10   0   78.89   39.00
   7  10   0  156.78   45.90
  -8 -10   0   18.80   30.30
  -8 -10   0   14.10   39.20
  -8 -10   0  -14.40   30.80
   8  10   0   -7.00   35.70
   8  10   0   45.10   45.10
   8  10   0   42.20   28.70
  -9 -10   0  -23.20   32.50
  -9 -10   0   -6.70   35.60
  -9 -10   0   29.40   43.50
   9  10   0    6.70   48.20
   9  10   0   -1.60   31.00
   9  10   0  -11.80   41.70
 -10 -10   0  331.37   46.60
 -10 -10   0  456.05   62.49
  10  10   0  341.77   58.29
  10  10   0  282.57   45.80
 -11 -10   0  111.09   40.90
 -11 -10   0  147.29   56.59
  11  10   0   97.29   39.90
  11  10   0  102.29   51.99
 -12 -10   0   -9.20   54.09
 -12 -10   0  -20.60   38.20
  12  10   0   71.59   40.30
  12  10   0  -35.40   50.89
 -13 -10   0  250.77   68.49
 -13 -10   0  189.98   48.50
  13  10   0  198.78   47.00
  13  10   0  224.28   66.09
 -14 -10   0  130.89   70.09
 -14 -10   0   45.10   48.60
  14  10   0  107.59   47.60
  14  10   0   43.00   60.69
 -15 -10   0  230.18   55.69
 -15 -10   0  218.58   83.69
  15  10   0  243.68   73.89
  15  10   0  183.18   57.89
 -16 -10   0   -5.70   78.29
 -16 -10   0 -113.59   53.59
  16  10   0  -12.20   55.89
  16  10   0  -18.90   73.69
 -17 -10   0 -151.68   58.49
 -17 -10   0   35.30   92.99
  17  10   0  -56.69   58.99
  17  10   0  -14.30   85.79
 -18 -10   0 -127.89   66.39
 -18 -10   0  294.87  102.99
  18  10   0  -34.60   62.29
  18  10   0  155.28   93.99
 -19 -10   0  -28.60   75.79
 -19 -10   0  135.99  109.39
  19  10   0  214.68  106.49
  19  10   0  -36.40   71.59
 -20 -10   0  -27.90  116.49
 -20 -10   0  -78.69   86.19
  20  10   0  -51.69  110.29
  20  10   0  -66.19   76.09
 -21 -10   0  112.79   92.29
 -21 -10   0   46.30  147.09
  21  10   0  -31.10   83.09
  21  10   0  275.57  146.89
 -22 -10   0  -58.99  125.29
 -22 -10   0  241.78  172.88
  22  10   0 -120.99   97.69
  27 -11   0    9.30  105.69
 -27  11   0  138.99  158.78
  26 -11   0  -13.30  104.09
 -26  11   0   39.90  127.09
  25 -11   0   68.29  102.89
 -25  11   0   19.90  130.39
  24 -11   0  -82.39   76.09
 -24  11   0  184.58   76.49
 -24  11   0   89.89  104.69
  23 -11   0    2.80   76.49
  23 -11   0  -30.00   73.59
 -23  11   0   51.09   69.29
 -23  11   0  127.99  101.09
  22 -11   0  180.38  105.49
  22 -11   0  -59.89   72.19
 -22  11   0   91.69   60.39
 -22  11   0  184.88  106.99
  21 -11   0  126.39   67.59
  21 -11   0  197.18   72.59
 -21  11   0  225.98  112.79
 -21  11   0  267.77   62.29
  20 -11   0   50.19   59.99
  20 -11   0    6.30   65.79
 -20  11   0  167.98   51.89
 -20  11   0  114.69   73.99
  19 -11   0  106.19   57.29
  19 -11   0  -22.60   62.09
  19 -11   0  132.39   85.69
 -19  11   0   64.49   69.89
 -19  11   0   74.09   46.10
  18 -11   0  -15.70   57.49
  18 -11   0   55.69   49.80
  18 -11   0  -61.39   73.89
 -18  11   0  -12.50   40.40
 -18  11   0   -5.20   61.79
  17 -11   0   37.10   46.20
  17 -11   0  -21.60   66.09
  17 -11   0  -59.09   52.69
 -17  11   0  -24.10   38.80
 -17  11   0  -31.00   54.59
  16 -11   0   77.09   41.30
  16 -11   0   61.79   59.39
  16 -11   0  -12.00   51.79
 -16  11   0    6.50   36.20
 -16  11   0   73.79   56.79
  15 -11   0  -25.00   53.79
  15 -11   0   31.40   48.50
  15 -11   0  -49.10   36.80
 -15  11   0  -14.80   35.30
 -15  11   0  -40.60   47.50
  14 -11   0  334.07   55.39
  14 -11   0  294.67   56.09
  14 -11   0  255.47   44.00
  14 -11   0  274.57   73.79
 -14  11   0  251.17   42.10
 -14  11   0  315.87   59.69
  13 -11   0   54.49   45.40
  13 -11   0   36.70   40.50
  13 -11   0   71.89   40.20
  13 -11   0   69.99   32.40
 -13  11   0   76.79   44.30
 -13  11   0   86.89   32.00
  12 -11   0   83.59   37.30
  12 -11   0  159.58   44.00
 -12  11   0  114.09   32.50
  11 -11   0  203.18   38.90
  11 -11   0  237.28   38.70
  11 -11   0  287.77   45.40
  11 -11   0  233.88   45.40
 -11  11   0  220.98   36.80
  10 -11   0  187.48   40.80
  10 -11   0  221.58   35.50
  10 -11   0  184.58   43.60
  10 -11   0  138.19   34.30
   9 -11   0  805.22   62.49
   9 -11   0  775.82   59.49
   9 -11   0  809.12   59.99
   9 -11   0  821.02   62.79
   8 -11   0   60.59   28.80
   8 -11   0   14.00   33.20
   8 -11   0   24.10   34.50
   8 -11   0   74.59   30.30
  -8  11   0   58.29   32.80
   7 -11   0    7.80   26.50
   7 -11   0   32.60   32.40
   7 -11   0    8.60   29.50
   7 -11   0   82.89   29.80
   7 -11   0   37.60   31.40
  -7  11   0    8.70   24.70
  -7  11   0    2.30   28.90
   6 -11   0  124.49   30.30
   6 -11   0  120.19   31.90
   6 -11   0   96.59   35.90
   6 -11   0  113.99   35.00
   6 -11   0  128.89   26.40
  -6  11   0   91.19   24.60
  -6  11   0  109.69   34.50
   5 -11   0  -17.30   20.60
   5 -11   0  -14.10   31.80
   5 -11   0    2.70   27.50
   5 -11   0  -18.30   23.50
   5 -11   0   18.50   29.20
  -5  11   0    0.60   27.30
  -5  11   0    3.60   20.70
   4 -11   0  124.69   22.60
   4 -11   0   97.39   28.60
   4 -11   0  125.59   31.70
   4 -11   0   98.89   29.20
   4 -11   0  147.09   35.60
  -4  11   0   99.69   23.20
  -4  11   0  103.19   34.20
   3 -11   0  184.88   33.20
   3 -11   0  112.19   29.60
   3 -11   0  119.89   29.80
   3 -11   0  146.29   38.70
   3 -11   0   76.19   22.30
  -3  11   0   78.79   32.80
  -3  11   0   96.59   22.30
   2 -11   0   87.99   20.70
   2 -11   0   55.49   25.30
   2 -11   0   43.20   31.50
   2 -11   0  114.19   30.40
  -2  11   0   67.69   20.90
  -2  11   0   60.19   31.30
   1 -11   0   67.39   32.70
   1 -11   0  109.19   30.20
   1 -11   0   73.69   20.30
   1 -11   0   79.79   26.50
  -1  11   0   43.70   29.60
  -1  11   0   46.50   21.40
  -1  11   0    9.90   28.60
   0 -11   0    4.50   18.60
   0 -11   0   -3.30   31.30
   0 -11   0   25.90   27.60
   0 -11   0   17.40   24.00
   0  11   0   23.50   28.20
   0  11   0    7.80   20.20
   0  11   0   38.20   28.50
  -1 -11   0   28.00   18.20
  -1 -11   0   69.59   37.40
  -1 -11   0   47.00   23.80
  -1 -11   0   29.80   28.00
   1  11   0   27.90   30.20
   1  11   0   34.70   29.10
   1  11   0   29.70   22.60
  -2 -11   0   47.60   29.80
  -2 -11   0   14.60   18.10
  -2 -11   0  -15.60   32.70
   2  11   0  -16.30   20.80
   2  11   0  -31.90   28.60
   2  11   0   13.40   31.20
  -3 -11   0   -4.80   22.70
  -3 -11   0  -31.60   29.70
  -3 -11   0   25.30   34.50
  -3 -11   0  -27.70   20.40
   3  11   0   -8.00   21.90
   3  11   0  -58.29   28.90
   3  11   0   -8.40   32.20
  -4 -11   0 2125.19   85.29
  -4 -11   0 2104.89   94.79
  -4 -11   0 2113.39   76.39
   4  11   0 2118.19   95.69
   4  11   0 2118.19   77.39
   4  11   0 1996.60   87.19
  -5 -11   0  523.95   56.09
  -5 -11   0  457.45   48.60
  -5 -11   0  535.05   53.59
  -5 -11   0  540.45   64.49
   5  11   0  424.96   51.79
   5  11   0  405.16   56.79
   5  11   0  370.46   45.00
  -6 -11   0   92.89   40.30
  -6 -11   0  103.49   30.70
  -6 -11   0  105.59   32.00
   6  11   0  144.09   48.00
   6  11   0  126.69   43.40
   6  11   0   84.09   30.20
  -7 -11   0   56.69   33.50
  -7 -11   0   79.79   41.90
  -7 -11   0    5.80   31.00
   7  11   0   13.90   39.20
   7  11   0   41.20   29.80
   7  11   0   35.30   44.80
  -8 -11   0   43.50   33.50
  -8 -11   0   35.30   34.70
  -8 -11   0   -8.50   42.70
   8  11   0   29.50   43.80
   8  11   0   35.50   32.40
   8  11   0    0.10   46.50
  -9 -11   0 1149.39   81.59
  -9 -11   0 1046.50   72.89
   9  11   0 1134.19   74.69
   9  11   0  916.21   87.39
   9  11   0 1096.59   87.19
 -10 -11   0  181.08   56.89
 -10 -11   0  117.39   43.10
  10  11   0  102.49   53.79
  10  11   0  134.79   39.20
 -11 -11   0   50.39   41.40
 -11 -11   0  -41.60   50.89
  11  11   0   -6.80   37.90
  11  11   0  -99.39   47.50
 -12 -11   0  416.26   73.19
 -12 -11   0  469.95   59.69
  12  11   0  483.75   75.19
  12  11   0  274.87   49.90
 -13 -11   0   22.30   45.90
 -13 -11   0  129.99   66.69
  13  11   0   56.99   63.19
  13  11   0   59.79   44.60
 -14 -11   0  436.26   62.79
 -14 -11   0  651.53  100.29
  14  11   0  470.05   61.89
  14  11   0  498.85   82.49
 -15 -11   0  -56.09   75.59
 -15 -11   0   -6.60   53.99
  15  11   0  -56.39   52.79
  15  11   0   51.29   74.99
 -16 -11   0  151.78   87.59
  16  11   0   28.20   78.69
  16  11   0  -67.39   57.29
 -17 -11   0   81.89   92.69
 -17 -11   0  -97.19   66.79
  17  11   0  -75.19   62.69
  17  11   0  156.68   93.19
 -18 -11   0 -158.58   71.79
  18  11   0  134.49  103.89
 -19 -11   0 -118.39   80.39
 -19 -11   0   97.89  116.29
  19  11   0    1.10   76.29
  19  11   0  139.09  115.29
 -20 -11   0  231.38  132.69
 -20 -11   0  -64.29   90.09
  20  11   0 -142.39   79.89
  20  11   0  104.59  124.89
 -21 -11   0   65.09  153.48
 -21 -11   0 -206.08  118.59
  21  11   0  -74.09   96.29
  26 -12   0  -76.29  116.79
 -26  12   0  -89.59  135.39
  25 -12   0   26.70   89.29
 -25  12   0  -47.10  124.69
  24 -12   0   75.19   79.89
 -24  12   0   51.49  107.59
 -24  12   0  134.49   75.59
  23 -12   0  -53.99   76.99
  23 -12   0  -41.90   78.59
 -23  12   0  137.49  108.79
 -23  12   0   98.09   67.79
  22 -12   0   96.69   78.89
  22 -12   0 -122.19   74.89
 -22  12   0  106.99   98.49
 -22  12   0   53.79   61.69
  21 -12   0  123.39   67.29
  21 -12   0  -94.09   71.99
 -21  12   0   81.09   61.79
  20 -12   0  308.47   76.69
  20 -12   0  345.67   69.79
 -20  12   0  456.65   96.39
 -20  12   0  430.36   66.39
  19 -12   0   12.10   64.89
  19 -12   0   26.60   53.99
 -19  12   0   14.90   48.60
 -19  12   0  125.49   75.59
  18 -12   0   25.90   50.29
  18 -12   0  116.39   82.99
  18 -12   0  -69.49   58.99
 -18  12   0   -0.30   61.19
 -18  12   0  -17.30   42.30
  17 -12   0   44.90   74.79
  17 -12   0   39.70   45.60
  17 -12   0  -26.00   55.99
 -17  12   0   40.60   58.49
 -17  12   0   44.20   39.70
  16 -12   0   95.29   53.99
  16 -12   0   73.29   64.99
  16 -12   0   -3.40   39.80
 -16  12   0   -3.80   37.60
 -16  12   0  -24.40   55.39
  15 -12   0   81.69   41.90
  15 -12   0   -0.30   50.69
  15 -12   0  143.59   63.59
 -15  12   0   36.90   37.00
  14 -12   0  249.68   44.90
  14 -12   0  304.67   55.89
  14 -12   0  198.28   59.79
 -14  12   0  243.28   43.80
  13 -12   0  141.89   35.90
  13 -12   0  177.98   48.70
  13 -12   0  172.48   55.09
  12 -12   0  -14.70   45.40
  11 -12   0   18.10   35.40
  11 -12   0   71.49   42.80
  11 -12   0    5.40   41.40
  11 -12   0   83.79   46.90
  10 -12   0  426.56   57.79
  10 -12   0  545.75   60.19
  10 -12   0  460.45   60.09
  10 -12   0  502.25   63.19
   9 -12   0  111.59   34.30
   9 -12   0   90.29   41.20
   9 -12   0  127.89   41.40
   9 -12   0   85.59   34.60
  -9  12   0  198.58   41.10
   8 -12   0   -5.80   33.20
   8 -12   0   11.40   31.60
   8 -12   0   12.00   36.70
   8 -12   0   34.60   29.00
   8 -12   0   50.59   39.30
  -8  12   0   10.30   32.60
   7 -12   0 1362.26   70.69
   7 -12   0 1304.17   76.89
   7 -12   0 1356.36   70.59
   7 -12   0 1375.26   65.89
   7 -12   0 1319.77   68.59
  -7  12   0 1318.17   72.79
  -7  12   0 1317.77   66.29
   6 -12   0   -8.70   34.90
   6 -12   0    3.70   29.70
   6 -12   0    6.60   31.60
   6 -12   0   15.40   25.70
   6 -12   0   44.10   28.20
  -6  12   0    7.70   24.80
  -6  12   0   10.20   29.60
   5 -12   0   35.80   33.90
   5 -12   0   19.80   22.70
   5 -12   0   21.90   21.80
   5 -12   0   28.80   27.50
   5 -12   0  -17.00   29.80
   5 -12   0   65.79   28.00
  -5  12   0    5.70   28.50
  -5  12   0  -10.00   20.90
   4 -12   0  158.98   31.20
   4 -12   0  188.38   34.70
   4 -12   0  177.08   40.00
   4 -12   0  153.68   31.60
   4 -12   0  280.97   36.20
  -4  12   0  148.69   25.30
  -4  12   0  183.98   39.30
   3 -12   0   61.29   25.90
   3 -12   0   55.59   35.80
   3 -12   0   41.60   31.30
   3 -12   0   14.70   21.10
   3 -12   0   40.80   27.40
  -3  12   0   39.30   31.50
  -3  12   0   23.30   20.60
   2 -12   0   83.89   30.60
   2 -12   0   42.30   26.10
   2 -12   0   36.70   28.60
   2 -12   0   56.99   35.40
   2 -12   0  -18.50   19.30
  -2  12   0   40.40   21.20
  -2  12   0   59.49   30.70
   1 -12   0    6.60   28.30
   1 -12   0  -13.40   32.70
   1 -12   0  -29.80   19.10
   1 -12   0  -33.60   22.20
  -1  12   0   17.20   29.40
  -1  12   0   -3.80   19.90
  -1  12   0  -52.79   27.60
   0 -12   0  122.19   23.60
   0 -12   0  161.48   32.80
   0 -12   0  156.28   40.50
   0 -12   0  129.29   29.40
   0  12   0  101.49   37.60
   0  12   0  110.79   24.30
   0  12   0  129.79   33.90
  -1 -12   0  103.89   29.30
  -1 -12   0  138.19   40.20
  -1 -12   0  142.19   35.40
  -1 -12   0  104.79   23.60
   1  12   0  145.59   36.20
   1  12   0   99.09   24.80
   1  12   0   94.89   37.30
  -2 -12   0  -40.60   23.30
  -2 -12   0  -53.69   21.90
  -2 -12   0  -12.60   35.60
  -2 -12   0    1.60   33.10
   2  12   0    9.00   33.20
   2  12   0  -22.00   23.30
   2  12   0   -3.40   31.60
  -3 -12   0 1894.61  118.29
  -3 -12   0 2064.59   86.19
  -3 -12   0 1949.80   73.39
   3  12   0 1876.91   84.69
   3  12   0 2135.69   95.79
   3  12   0 2035.80   76.29
  -4 -12   0  529.35   58.09
  -4 -12   0  491.35   51.09
  -4 -12   0  526.05   55.09
   4  12   0  424.86   61.99
   4  12   0  427.96   61.99
  -5 -12   0  185.28   32.50
  -5 -12   0  184.58   45.40
  -5 -12   0  131.59   34.20
   5  12   0  129.69   32.00
   5  12   0   62.59   45.10
   5  12   0  153.88   48.50
  -6 -12   0   83.69   31.10
  -6 -12   0   30.00   40.50
  -6 -12   0    4.80   32.80
   6  12   0   29.80   29.60
   6  12   0   17.10   39.90
   6  12   0  -15.60   44.90
  -7 -12   0   38.90   35.30
  -7 -12   0   95.69   37.90
  -7 -12   0   59.69   44.40
   7  12   0    7.30   48.00
   7  12   0   77.99   48.90
   7  12   0   77.19   34.10
  -8 -12   0  534.95   68.39
  -8 -12   0  652.13   72.79
  -8 -12   0  791.62   68.69
   8  12   0  714.63   64.39
   8  12   0  653.53   75.59
   8  12   0  637.34   80.29
  -9 -12   0  320.87   49.20
  -9 -12   0  280.77   61.59
   9  12   0  301.27   46.80
   9  12   0  257.17   61.99
 -10 -12   0   -5.50   38.50
 -10 -12   0   11.30   51.69
  10  12   0  -12.60   52.39
  10  12   0  -21.60   38.80
 -11 -12   0  257.37   70.19
 -11 -12   0  274.77   50.99
  11  12   0  359.66   70.99
  11  12   0  192.58   48.30
 -12 -12   0  103.49   67.09
 -12 -12   0  -14.80   43.50
  12  12   0  -47.40   61.49
  12  12   0  -74.59   42.60
 -13 -12   0   68.59   50.89
 -13 -12   0  128.19   73.99
  13  12   0   10.60   48.40
  13  12   0  104.19   69.69
 -14 -12   0  -49.30   52.99
 -14 -12   0   -4.50   78.99
  14  12   0  -38.10   52.09
  14  12   0   55.99   77.39
 -15 -12   0   55.19   84.19
  15  12   0  -58.59   55.19
  15  12   0   19.30   85.29
 -16 -12   0   74.39   93.59
 -16 -12   0   16.70   63.69
  16  12   0  214.28   95.09
  16  12   0  -95.69   62.29
 -17 -12   0  -56.19   71.09
 -17 -12   0   34.20  102.29
  17  12   0  -27.70   68.29
  17  12   0  105.49  107.89
 -18 -12   0 -160.68   76.09
 -18 -12   0   95.59  113.99
  18  12   0  -52.69   78.09
  18  12   0   83.49  113.69
 -19 -12   0 -129.59   81.99
 -19 -12   0   86.49  127.09
  19  12   0 -155.98   85.29
  19  12   0  191.08  120.99
 -20 -12   0   34.20  141.69
  26 -13   0  127.69  103.49
  25 -13   0   -8.50   92.69
 -25  13   0   45.20  130.49
  24 -13   0   29.50   92.69
 -24  13   0   11.80  110.39
  23 -13   0  -53.39   79.79
 -23  13   0   22.20  104.49
  22 -13   0  -55.19   82.69
  22 -13   0   66.09   73.29
 -22  13   0  140.19  100.19
  21 -13   0  471.05   88.89
  21 -13   0  373.76   78.59
 -21  13   0  544.75   76.19
 -21  13   0  403.26  118.49
  20 -13   0    4.20   66.29
  20 -13   0  -20.90   70.59
 -20  13   0  185.58   83.29
 -20  13   0  143.69   60.79
  19 -13   0   33.20   69.49
  19 -13   0   -4.40   60.99
 -19  13   0  168.88   55.89
  18 -13   0   32.60   54.49
  18 -13   0   26.80   62.89
 -18  13   0  186.98   48.90
  17 -13   0  284.47   66.19
  17 -13   0  286.17   59.49
  16 -13   0   29.80   51.89
  16 -13   0   14.50   41.70
  15 -13   0   67.89   41.80
  15 -13   0  122.79   54.39
  15 -13   0  130.29   80.49
  14 -13   0  115.89   59.29
  14 -13   0  121.49   42.20
  14 -13   0   64.29   50.79
  13 -13   0  521.55   80.09
  13 -13   0  475.05   62.29
  12 -13   0   72.09   48.70
  11 -13   0  103.59   47.70
  11 -13   0  146.19   50.39
  11 -13   0  167.98   40.00
  10 -13   0  113.49   44.80
  10 -13   0   91.19   35.90
  10 -13   0  163.78   46.10
   9 -13   0   46.40   32.50
   9 -13   0   11.50   42.80
   9 -13   0   45.60   42.60
   9 -13   0   45.30   38.10
  -9  13   0   69.69   37.30
   8 -13   0 1676.73   83.39
   8 -13   0 1655.83   88.29
   8 -13   0 1762.42   83.19
   8 -13   0 1761.02   77.79
  -8  13   0 1708.93   76.49
  -8  13   0 1722.63   84.99
   7 -13   0  160.48   34.00
   7 -13   0  201.78   41.00
   7 -13   0  250.87   45.40
   7 -13   0  192.98   46.10
  -7  13   0  176.88   43.30
   6 -13   0 1338.57   68.59
   6 -13   0 1392.46   72.09
   6 -13   0 1408.66   73.39
   6 -13   0 1543.15   82.49
   6 -13   0 1327.77   70.69
  -6  13   0 1402.06   65.89
  -6  13   0 1363.06   76.09
   5 -13   0  -13.30   25.90
   5 -13   0   56.29   37.70
   5 -13   0  -16.00   38.40
   5 -13   0   23.10   25.70
   5 -13   0   -5.60   30.60
  -5  13   0   19.50   32.60
  -5  13   0   10.40   23.00
   4 -13   0   20.70   25.10
   4 -13   0    0.40   35.70
   4 -13   0   -4.40   25.40
   4 -13   0   -3.40   31.70
  -4  13   0   -3.80   32.20
  -4  13   0    5.30   21.70
   3 -13   0   15.00   26.90
   3 -13   0   49.10   37.20
   3 -13   0   23.90   22.90
   3 -13   0  -17.00   33.40
  -3  13   0  -10.60   30.90
  -3  13   0   33.80   22.40
   2 -13   0   -7.20   21.80
   2 -13   0   45.80   36.70
   2 -13   0   -9.30   25.60
   2 -13   0   45.10   35.30
  -2  13   0  -24.70   30.40
  -2  13   0  -10.90   21.10
   1 -13   0  656.63   55.69
   1 -13   0  623.04   56.39
   1 -13   0  589.44   44.70
   1 -13   0  851.41  104.89
  -1  13   0  571.84   59.99
  -1  13   0  700.63   53.89
  -1  13   0  662.23   45.30
   0 -13   0  894.81   60.29
   0 -13   0  918.41   63.09
   0 -13   0  931.21   50.39
   0  13   0  878.21   51.39
   0  13   0  845.02   58.99
   0  13   0  831.12   67.49
  -1 -13   0   74.89   29.80
  -1 -13   0   75.29   26.60
  -1 -13   0  110.59   37.30
   1  13   0  115.89   39.60
   1  13   0   90.89   29.20
   1  13   0  137.09   38.30
  -2 -13   0 2134.49   78.59
  -2 -13   0 2125.89   90.99
   2  13   0 2195.08   81.39
   2  13   0 2085.89   99.39
   2  13   0 1965.00   84.99
  -3 -13   0  679.93   62.49
  -3 -13   0  677.13   63.29
  -3 -13   0  706.93   54.19
   3  13   0  620.54   65.49
   3  13   0  706.73   70.69
   3  13   0  656.43   59.59
  -4 -13   0  519.05   52.09
  -4 -13   0  663.73   63.59
  -4 -13   0  595.24   61.59
   4  13   0  647.44   56.29
   4  13   0  486.05   66.49
   4  13   0  491.45   66.59
  -5 -13   0  -10.30   31.70
  -5 -13   0  -34.00   41.70
  -5 -13   0   47.00   31.90
   5  13   0  -47.30   44.00
   5  13   0  -42.90   39.40
   5  13   0   30.10   30.60
  -6 -13   0  139.29   38.30
  -6 -13   0  181.68   49.20
  -6 -13   0  173.68   42.20
   6  13   0  164.28   36.30
   6  13   0  124.69   48.80
   6  13   0  155.88   52.49
  -7 -13   0  201.38   44.00
  -7 -13   0  316.37   58.19
  -7 -13   0  285.27   48.20
   7  13   0  353.36   66.99
   7  13   0  244.68   57.49
   7  13   0  262.07   40.50
  -8 -13   0   37.60   37.50
  -8 -13   0   52.89   50.59
   8  13   0  -28.30   55.49
   8  13   0    6.20   36.30
   8  13   0   51.29   53.19
  -9 -13   0  148.19   59.39
  -9 -13   0  126.99   43.60
   9  13   0  127.99   58.09
   9  13   0   86.69   40.10
 -10 -13   0   -6.40   40.80
 -10 -13   0   66.09   57.29
  10  13   0   55.29   61.89
  10  13   0  -21.50   39.10
 -11 -13   0  -17.70   45.90
 -11 -13   0  -16.60   61.49
  11  13   0    2.30   43.80
  11  13   0   53.49   70.99
 -12 -13   0  218.38   73.59
 -12 -13   0   26.40   49.00
  12  13   0  151.58   50.69
  12  13   0   78.59   73.59
 -13 -13   0  -77.89   52.99
 -13 -13   0   10.90   76.39
  13  13   0   57.39   76.49
  13  13   0   60.49   53.89
 -14 -13   0  -36.00   56.19
 -14 -13   0  -49.80   84.39
  14  13   0   27.40   82.89
  14  13   0  -14.30   57.09
 -15 -13   0   82.49   93.59
 -15 -13   0  -53.89   64.39
  15  13   0  -53.09   89.19
  15  13   0 -108.09   58.79
 -16 -13   0   -7.30  102.29
 -16 -13   0 -150.08   67.39
  16  13   0 -140.69   69.09
  16  13   0  117.29  100.19
 -17 -13   0 -140.49   71.39
  17  13   0  167.28  119.79
  17  13   0  -54.89   94.19
 -18 -13   0 -195.98   78.79
 -18 -13   0  129.39  141.29
  18  13   0   12.90   84.99
 -19 -13   0  244.88  146.99
 -19 -13   0 -160.88  105.59
  19  13   0 -166.38   92.69
  19  13   0  136.09  137.79
 -20 -13   0  177.88  168.08
 -20 -13   0 -105.49  102.39
  20  13   0  329.47  145.09
  20  13   0 -162.38  106.99
  26 -14   0   14.80  107.69
  25 -14   0   10.90  112.79
  24 -14   0  168.88  109.79
  23 -14   0 -113.89   92.79
  23 -14   0  -78.39   77.09
  22 -14   0   71.39   76.59
  22 -14   0 -107.29   85.29
  21 -14   0   31.40   76.89
  21 -14   0  -19.30   80.69
  20 -14   0  194.98   75.39
  20 -14   0    5.80   77.89
  19 -14   0  -71.19   70.39
  19 -14   0  -21.10   59.19
  18 -14   0   88.29   66.59
  18 -14   0   43.50   56.59
  17 -14   0   66.49   53.49
  17 -14   0  -83.69   61.09
  16 -14   0  -15.80   54.19
  16 -14   0  -42.10   46.90
  15 -14   0  -25.00   50.79
  15 -14   0    2.20   40.50
  14 -14   0   89.19   41.10
  11 -14   0  202.78   47.00
  10 -14   0   29.10   45.60
  10 -14   0   63.09   41.10
  10 -14   0   67.89   38.20
 -10  14   0   43.00   42.80
   9 -14   0  110.99   47.70
   9 -14   0   80.79   36.10
   9 -14   0  117.79   43.80
  -9  14   0  135.99   44.80
   8 -14   0   52.29   34.60
   8 -14   0   69.89   39.60
   8 -14   0   49.60   42.50
  -8  14   0   63.39   39.30
  -8  14   0   50.19   30.30
   7 -14   0 2618.44  103.39
   7 -14   0 2637.84  104.49
   7 -14   0 2771.02   98.89
   7 -14   0 2827.32  107.39
  -7  14   0 2874.81  114.09
  -7  14   0 2846.02   95.79
   6 -14   0  517.45   55.89
   6 -14   0  443.96   56.49
   6 -14   0  381.86   55.69
   6 -14   0  453.55   60.39
  -6  14   0  450.55   53.49
  -6  14   0  463.95   60.09
   5 -14   0  -59.09   29.50
   5 -14   0   31.40   38.90
   5 -14   0  -15.70   37.20
   5 -14   0   30.80   28.30
  -5  14   0   21.80   29.00
  -5  14   0   30.40   37.90
   4 -14   0  124.19   42.40
   4 -14   0  140.29   31.30
   4 -14   0  159.28   34.00
  -4  14   0  103.59   38.90
  -4  14   0  128.49   30.10
   3 -14   0  -55.19   25.40
   3 -14   0   -0.80   26.90
  -3  14   0    1.50   24.00
  -3  14   0  -64.89   31.80
   2 -14   0  -43.20   40.80
   2 -14   0   -2.70   26.60
   2 -14   0  -28.20   25.50
  -2  14   0  -12.50   23.20
  -2  14   0  -65.99   31.90
   1 -14   0  137.39   29.50
   1 -14   0  179.48   38.50
   1 -14   0  174.48   49.80
  -1  14   0  162.88   45.20
  -1  14   0  185.68   29.80
  -1  14   0  203.48   43.50
   0 -14   0  299.47   44.00
   0 -14   0  278.87   34.30
   0 -14   0  407.66   82.69
   0  14   0  299.67   52.89
   0  14   0  435.96   48.90
   0  14   0  308.07   48.10
  -1 -14   0 3453.65  106.99
  -1 -14   0 3519.85  125.69
  -1 -14   0 3579.54  129.59
   1  14   0 3541.35  109.99
   1  14   0 3369.16  133.49
   1  14   0 3428.46  116.79
  -2 -14   0  811.12   67.29
  -2 -14   0  776.82   68.29
  -2 -14   0  748.33   57.49
   2  14   0  705.13   69.09
   2  14   0  749.13   61.79
   2  14   0  732.13   72.59
  -3 -14   0 1115.99   75.99
  -3 -14   0  997.50   62.99
  -3 -14   0 1085.59   73.59
   3  14   0 1055.99   66.59
   3  14   0  933.41   75.49
   3  14   0  967.90   82.69
  -4 -14   0  578.84   59.09
  -4 -14   0  649.93   64.99
  -4 -14   0  544.55   64.79
   4  14   0  488.35   71.49
   4  14   0  489.25   60.39
   4  14   0  628.44   57.59
  -5 -14   0   -8.90   45.00
  -5 -14   0   24.10   35.30
  -5 -14   0   36.90   34.00
   5  14   0   36.10   32.30
   5  14   0  -37.50   48.20
   5  14   0   47.20   49.99
  -6 -14   0  180.28   52.79
  -6 -14   0  116.59   42.00
  -6 -14   0  178.88   42.00
   6  14   0  172.18   53.79
   6  14   0  134.09   36.50
   6  14   0   85.69   53.09
  -7 -14   0   38.60   43.40
  -7 -14   0  -59.49   41.50
  -7 -14   0   94.09   52.49
   7  14   0   15.40   56.59
   7  14   0   48.10   54.59
   7  14   0   -2.60   35.50
  -8 -14   0   13.60   42.60
  -8 -14   0   86.19   53.29
   8  14   0   62.49   54.49
   8  14   0   78.69   40.20
  -9 -14   0   28.60   54.49
  -9 -14   0   34.00   43.40
   9  14   0   17.90   61.19
   9  14   0   32.60   42.40
 -10 -14   0   13.00   47.00
 -10 -14   0   99.09   64.79
  10  14   0   80.39   70.39
  10  14   0   99.09   45.80
 -11 -14   0  450.95   80.69
 -11 -14   0  307.27   64.49
  11  14   0  620.14   96.59
  11  14   0  435.16   57.99
 -12 -14   0   45.70   54.49
 -12 -14   0   46.30   73.29
  12  14   0    1.80   49.60
  12  14   0  -20.10   74.19
 -13 -14   0   38.00   82.39
 -13 -14   0   31.40   58.59
  13  14   0  159.18   81.39
 -14 -14   0  -35.60   61.89
 -14 -14   0   88.69   94.39
  14  14   0  197.28   88.99
  14  14   0   11.70   60.39
 -15 -14   0   -7.30  106.09
  15  14   0 -126.79   68.29
  15  14   0  141.79  102.19
 -16 -14   0  137.79   81.79
 -16 -14   0  402.46  124.99
  16  14   0  230.88   82.29
  16  14   0  551.44  124.99
 -17 -14   0  402.06  143.19
 -17 -14   0   73.29   88.89
  17  14   0   -0.90   99.49
 -18 -14   0   50.69  143.59
  18  14   0   93.79  142.19
  18  14   0  -63.29   89.49
 -19 -14   0  300.17  158.48
  19  14   0 -148.59   98.59
  19  14   0  299.47  160.78
  26 -15   0  190.78  142.69
  25 -15   0  232.08  107.19
  24 -15   0  -23.90   88.89
  23 -15   0 -119.69   98.19
  23 -15   0  100.39   95.09
  22 -15   0  126.39   92.69
  21 -15   0  -58.29   81.99
  21 -15   0    9.60   83.29
  20 -15   0  -41.30   80.29
  20 -15   0   68.59   68.49
  19 -15   0  -91.69   71.29
  19 -15   0   30.50   59.89
  18 -15   0   68.69   68.79
  18 -15   0   -3.10   52.59
  17 -15   0   13.40   65.99
  17 -15   0  -34.90   50.49
  16 -15   0  -45.20   46.00
  16 -15   0   88.39   64.39
  15 -15   0  135.69   57.49
  15 -15   0  142.99   49.70
  14 -15   0   38.30   41.20
  11 -15   0   22.10   49.80
  10 -15   0  168.58   51.19
  10 -15   0  179.78   57.39
  10 -15   0  157.18   44.60
 -10  15   0  206.98   55.59
   9 -15   0  115.69   42.10
   9 -15   0  164.38   48.40
   9 -15   0  188.78   53.29
  -9  15   0  189.68   49.20
   8 -15   0  299.77   42.90
   8 -15   0  291.17   50.49
   8 -15   0  312.47   55.29
   8 -15   0  141.09   36.50
  -8  15   0  200.28   36.90
  -8  15   0  218.38   51.39
   7 -15   0   51.69   32.80
   7 -15   0   34.20   34.60
   7 -15   0   -1.40   42.60
   7 -15   0   27.40   39.80
  -7  15   0   60.99   32.70
  -7  15   0   -3.00   42.40
   6 -15   0   86.09   41.00
   6 -15   0   -7.80   32.30
   6 -15   0   31.60   41.30
   6 -15   0    9.30   31.20
  -6  15   0   30.00   31.50
  -6  15   0   15.60   41.80
   5 -15   0  229.98   44.60
   5 -15   0  169.68   35.90
   5 -15   0  275.27   41.80
   5 -15   0  190.08   45.80
  -5  15   0  226.88   44.20
  -5  15   0  243.28   48.30
   4 -15   0   26.10   30.30
   4 -15   0  -24.00   29.50
   4 -15   0   15.90   41.10
  -4  15   0  -25.00   37.90
  -4  15   0   -3.50   29.30
   3 -15   0  177.98   45.90
   3 -15   0   58.19   31.00
   3 -15   0  114.79   37.10
  -3  15   0  117.19   31.50
  -3  15   0  163.28   46.90
   2 -15   0   89.19   42.00
   2 -15   0   -7.30   29.50
   2 -15   0    0.90   32.70
  -2  15   0   63.59   43.30
  -2  15   0   72.39   30.60
   1 -15   0   70.09   42.00
   1 -15   0  -22.70   33.10
  -1  15   0  -43.40   27.80
  -1  15   0  -26.50   42.50
  -1  15   0  -22.20   41.80
   0 -15   0 1129.89   74.39
   0 -15   0 1115.69   76.09
   0 -15   0 1106.09   65.19
   0  15   0  963.00   72.49
   0  15   0  950.10   78.99
   0  15   0 1057.19   64.69
  -1 -15   0  529.65   64.29
  -1 -15   0  463.85   54.99
   1  15   0  525.05   66.79
   1  15   0  436.36   54.59
   1  15   0  528.85   72.39
  -2 -15   0 1089.19   77.99
  -2 -15   0 1179.68   76.49
  -2 -15   0 1096.39   66.19
   2  15   0 1009.30   84.99
   2  15   0 1126.69   74.29
   2  15   0  941.11   75.69
  -3 -15   0  782.92   74.09
  -3 -15   0  819.82   70.29
  -3 -15   0  686.13   62.39
   3  15   0  602.24   71.49
   3  15   0  896.61   63.29
   3  15   0  695.03   80.59
  -4 -15   0  -37.10   34.70
  -4 -15   0    3.10   45.30
  -4 -15   0   49.40   39.10
   4  15   0    0.50   34.20
   4  15   0  -36.90   50.49
   4  15   0  -39.80   47.50
  -5 -15   0   94.19   40.60
  -5 -15   0  247.88   56.79
  -5 -15   0  203.58   45.60
   5  15   0  104.49   36.50
   5  15   0  137.89   55.89
   5  15   0  152.48   58.99
  -6 -15   0   16.20   42.00
  -6 -15   0  123.89   54.89
  -6 -15   0  -13.70   40.00
   6  15   0   53.39   55.09
   6  15   0    2.60   35.00
   6  15   0  -32.10   54.09
  -7 -15   0  414.96   67.89
  -7 -15   0  323.47   53.49
   7  15   0  427.86   74.59
   7  15   0  175.08   73.19
   7  15   0  304.47   46.60
  -8 -15   0  816.62   84.99
  -8 -15   0  800.52   80.09
   8  15   0  672.83   90.19
   8  15   0  712.03   71.09
  -9 -15   0    1.70   47.40
  -9 -15   0   92.99   62.29
   9  15   0   79.29   68.19
   9  15   0  -43.60   41.50
 -10 -15   0  307.77   74.69
 -10 -15   0   91.99   52.79
  10  15   0  196.78   70.69
 -11 -15   0   94.79   72.99
 -11 -15   0  -98.39   52.59
  11  15   0  -60.39   49.90
  11  15   0  -16.90   71.89
 -12 -15   0   10.80   56.09
 -12 -15   0  141.19   84.89
  12  15   0 -120.69   53.79
  12  15   0  114.49   89.09
 -13 -15   0 -141.79   59.99
 -13 -15   0  166.48   94.09
  13  15   0  -38.00   61.69
  13  15   0  103.09   88.59
 -14 -15   0  -84.99   65.09
 -14 -15   0  132.29  105.39
  14  15   0  157.48   95.69
  14  15   0 -109.99   64.39
 -15 -15   0  983.60  145.69
 -15 -15   0  876.61  116.89
  15  15   0  745.93   98.79
 -16 -15   0  703.43  170.58
  16  15   0  769.12  148.59
 -17 -15   0 -164.88   93.79
 -17 -15   0  272.27  133.99
  17  15   0  -59.69   90.29
  17  15   0  360.16  131.59
 -18 -15   0  137.89  158.88
 -18 -15   0 -164.58   97.19
  18  15   0  123.09  135.19
  18  15   0 -225.68   93.19
  25 -16   0  -95.79  118.39
  24 -16   0   34.50  100.59
  23 -16   0   -2.40   86.09
  23 -16   0 -256.17  112.99
  22 -16   0  110.69   88.09
  22 -16   0 -160.08   94.19
  21 -16   0   60.99   92.19
  20 -16   0  -84.99   86.79
  20 -16   0  -34.90   76.29
  19 -16   0 -109.59   67.49
  19 -16   0   42.50   76.59
  18 -16   0  -24.80   69.79
  18 -16   0  -25.30   61.19
  17 -16   0  -42.70   56.59
  17 -16   0   62.99   68.69
  16 -16   0  211.88   56.79
  16 -16   0  287.07   71.99
  15 -16   0  161.48   49.60
  14 -16   0  121.79   49.10
  13 -16   0  116.69   57.99
  12 -16   0  195.18   58.19
  11 -16   0    4.40   50.39
  10 -16   0  -11.70   46.00
  10 -16   0   45.60   48.30
 -10  16   0  -75.29   47.20
   9 -16   0    2.40   43.20
   9 -16   0    7.70   47.80
   9 -16   0  -39.10   35.10
   9 -16   0   11.20   55.49
  -9  16   0  -52.89   43.10
   8 -16   0  174.38   42.60
   8 -16   0  225.08   52.79
   8 -16   0  224.18   43.30
   8 -16   0  195.48   57.19
  -8  16   0  195.88   39.20
  -8  16   0  186.88   54.89
   7 -16   0  -29.60   47.60
   7 -16   0  -16.60   37.10
   7 -16   0  -81.09   30.30
   7 -16   0  -51.09   41.30
  -7  16   0   -1.80   31.60
   6 -16   0  -20.20   44.10
   6 -16   0  -60.09   36.90
   6 -16   0   29.90   31.80
   6 -16   0   -0.90   41.40
  -6  16   0  -33.20   30.80
  -6  16   0  -49.00   39.50
   5 -16   0  103.29   36.40
   5 -16   0  122.89   46.50
   5 -16   0  118.09   46.80
   5 -16   0   52.99   34.80
  -5  16   0   74.89   46.50
  -5  16   0  102.29   34.20
   4 -16   0  -46.50   32.60
   4 -16   0  -33.70   32.60
   4 -16   0  -23.00   43.60
  -4  16   0  -33.80   40.30
   3 -16   0  -10.40   34.70
   3 -16   0   11.90   43.90
   3 -16   0  -18.50   31.50
  -3  16   0   36.60   35.40
  -3  16   0    5.00   46.50
   2 -16   0   24.40   35.50
   2 -16   0  -31.30   29.90
   2 -16   0   99.19   45.40
  -2  16   0  -37.60   44.00
  -2  16   0   65.49   34.10
   1 -16   0  463.95   55.39
   1 -16   0  680.63   69.29
   1 -16   0  648.94   69.89
  -1  16   0  656.53   69.49
  -1  16   0  618.24   75.39
   0 -16   0   22.00   36.30
   0 -16   0   -8.10   31.80
   0 -16   0   26.20   46.20
   0  16   0   12.10   44.80
   0  16   0   39.20   45.90
  -1 -16   0  434.56   66.19
  -1 -16   0  337.47   50.59
  -1 -16   0  283.87   41.20
   1  16   0  402.06   56.09
   1  16   0  422.26   57.09
   1  16   0  459.65   72.59
  -2 -16   0  210.18   40.60
  -2 -16   0  283.97   55.99
  -2 -16   0  147.09   44.30
   2  16   0  186.58   59.09
   2  16   0  232.38   39.80
   2  16   0  157.58   52.99
  -3 -16   0   21.70   40.00
  -3 -16   0   29.40   46.60
  -3 -16   0   -9.10   36.50
   3  16   0   29.40   52.79
   3  16   0   33.40   35.70
   3  16   0  -28.80   50.99
  -4 -16   0   25.30   39.10
  -4 -16   0   61.59   49.00
  -4 -16   0  -15.10   38.60
   4  16   0   15.60   35.00
   4  16   0   16.40   52.09
   4  16   0  -12.80   51.79
  -5 -16   0  -61.19   42.80
  -5 -16   0  -29.80   38.40
  -5 -16   0  -17.40   49.80
   5  16   0  -10.10   36.60
   5  16   0   42.00   58.19
   5  16   0  -59.19   52.39
  -6 -16   0    1.40   44.10
  -6 -16   0  -31.10   62.49
  -6 -16   0   11.30   56.49
   6  16   0  -80.69   54.29
   6  16   0  -10.30   38.80
  -7 -16   0   67.89   48.80
  -7 -16   0  149.69   61.49
   7  16   0   56.89   40.50
   7  16   0   19.70   63.49
  -8 -16   0   86.49   52.39
  -8 -16   0   80.99   62.79
   8  16   0   35.00   67.29
   8  16   0  -15.50   43.80
  -9 -16   0   11.10   50.19
  -9 -16   0   35.80   67.89
   9  16   0    3.40   48.50
   9  16   0   94.19   73.39
 -10 -16   0  114.29   73.99
 -10 -16   0  -92.19   53.09
  10  16   0  -12.20   78.29
  10  16   0 -116.69   48.50
 -11 -16   0  -11.50   58.59
 -11 -16   0  127.39   84.29
  11  16   0  -14.40   78.59
 -12 -16   0  185.28   95.69
 -12 -16   0  -32.70   63.29
  12  16   0   60.89   88.79
  12  16   0  -77.89   59.59
 -13 -16   0  -17.40   68.39
 -13 -16   0   15.90   94.89
  13  16   0 -126.29   64.39
 -14 -16   0  309.07  123.09
  14  16   0  407.46  118.09
  14  16   0  107.49   77.29
 -15 -16   0  857.61  148.89
 -15 -16   0  394.46   93.79
  15  16   0  397.26   89.79
  15  16   0  497.15  137.89
 -16 -16   0  164.78  146.49
 -16 -16   0  -85.79   86.69
  16  16   0  -14.00   98.79
  16  16   0  383.36  133.19
 -17 -16   0   83.79   99.09
 -17 -16   0  230.78  154.28
  17  16   0  166.98  146.99
  17  16   0  -15.50   99.89
  25 -17   0  -12.00  110.09
  24 -17   0   59.99  111.49
  23 -17   0 -252.37  126.99
  23 -17   0   42.00  110.19
  22 -17   0   -5.50  105.49
  22 -17   0  -81.79   91.29
  21 -17   0 -184.78   95.49
  21 -17   0   51.09   93.39
  20 -17   0   -1.00   71.49
  20 -17   0 -106.49   90.29
  19 -17   0  -61.09   67.49
  19 -17   0   22.50   82.39
  18 -17   0  -12.50   61.89
  18 -17   0   46.70   79.19
  17 -17   0   76.29   77.39
  17 -17   0  -43.40   57.49
  16 -17   0   19.50   56.89
  16 -17   0   21.60   71.29
  15 -17   0  184.48   57.39
  14 -17   0   48.70   49.80
  14 -17   0  117.79   68.19
  13 -17   0  295.67   68.89
  12 -17   0   32.70   59.49
  11 -17   0   41.50   53.59
  11 -17   0  -16.60   38.00
  10 -17   0   -3.80   37.20
  10 -17   0   27.40   51.89
 -10  17   0  -60.09   50.19
   9 -17   0   31.60   38.00
   9 -17   0   53.69   48.10
   9 -17   0   46.20   49.50
   9 -17   0   -9.20   61.69
  -9  17   0  -30.50   48.90
   8 -17   0   41.90   40.30
   8 -17   0   11.80   44.40
   8 -17   0   55.79   48.90
   8 -17   0  102.09   59.69
  -8  17   0   69.39   50.09
  -8  17   0   98.59   36.50
   7 -17   0  191.38   60.99
   7 -17   0  150.18   43.20
   7 -17   0  133.99   42.30
   7 -17   0  254.57   55.19
  -7  17   0  145.19   55.99
  -7  17   0  262.67   40.40
   6 -17   0  145.39   42.80
   6 -17   0  161.08   44.70
   6 -17   0  246.98   54.89
   6 -17   0  290.27   57.39
  -6  17   0  187.28   38.50
  -6  17   0  134.79   50.29
   5 -17   0  -24.50   35.20
   5 -17   0    5.90   49.50
   5 -17   0   55.19   48.50
   5 -17   0   58.79   37.30
  -5  17   0   33.60   46.90
  -5  17   0   50.69   33.10
   4 -17   0  221.28   46.00
   4 -17   0  277.87   55.09
   4 -17   0  215.88   40.40
  -4  17   0  241.88   39.50
  -4  17   0  288.27   60.59
   3 -17   0  -31.80   36.20
   3 -17   0   91.89   47.80
   3 -17   0    6.70   34.60
  -3  17   0  -31.90   45.20
  -3  17   0   54.79   35.10
   2 -17   0  368.06   51.29
   2 -17   0  348.27   41.40
   2 -17   0  494.35   68.19
  -2  17   0  483.45   71.99
  -2  17   0  610.84   67.09
   1 -17   0  -23.40   35.30
   1 -17   0   19.10   36.90
   1 -17   0   56.29   46.60
  -1  17   0   20.00   32.80
  -1  17   0   33.30   51.79
   0 -17   0   -7.10   36.20
   0 -17   0   33.80   38.90
   0 -17   0  165.58   51.89
   0  17   0  107.39   35.20
   0  17   0   -8.00   50.59
   0  17   0   57.39   49.30
  -1 -17   0   55.39   41.70
  -1 -17   0  -63.09   35.40
  -1 -17   0   48.80   48.60
   1  17   0   55.29   35.10
   1  17   0   17.30   49.50
   1  17   0   49.50   52.69
  -2 -17   0   66.29   51.39
  -2 -17   0  -18.20   40.10
  -2 -17   0   -8.80   38.30
   2  17   0   38.70   53.79
   2  17   0   23.00   35.10
   2  17   0  -31.20   53.39
  -3 -17   0  172.18   54.79
  -3 -17   0   84.09   47.60
  -3 -17   0   67.29   42.90
   3  17   0   86.89   38.90
   3  17   0  141.19   60.09
   3  17   0   33.10   55.09
  -4 -17   0   54.79   45.80
  -4 -17   0   44.70   45.30
  -4 -17   0  -38.20   51.09
   4  17   0   26.60   38.10
   4  17   0   13.70   56.29
   4  17   0   20.20   59.29
  -5 -17   0  -11.20   47.70
  -5 -17   0  125.09   58.29
  -5 -17   0    5.70   49.99
   5  17   0    1.80   41.50
   5  17   0   61.39   62.79
   5  17   0   49.20   58.99
  -6 -17   0   91.09   52.69
  -6 -17   0  -12.60   57.99
   6  17   0  -36.20   61.69
   6  17   0  -28.20   41.40
  -7 -17   0   34.30   60.59
  -7 -17   0  -46.40   48.50
   7  17   0  -35.10   42.60
   7  17   0   21.10   73.99
  -8 -17   0   34.90   54.79
  -8 -17   0   36.40   70.09
   8  17   0  -10.90   48.00
   8  17   0  -76.69   73.49
  -9 -17   0  208.48   83.39
  -9 -17   0   37.40   57.69
   9  17   0  -42.80   51.39
   9  17   0   73.39   79.39
 -10 -17   0  119.79   85.29
 -10 -17   0  -38.00   61.49
  10  17   0 -138.89   54.39
  10  17   0   18.00   81.89
 -11 -17   0   63.49   96.09
 -11 -17   0 -147.59   59.89
  11  17   0  -29.80   99.79
  11  17   0  -77.29   59.29
 -12 -17   0  -63.89   63.89
 -12 -17   0   43.00   96.29
  12  17   0  -94.19   69.49
  12  17   0   -5.60  101.19
 -13 -17   0  -68.99  113.99
  13  17   0   64.69  114.09
  13  17   0 -176.58   71.69
 -14 -17   0  375.56  131.89
 -14 -17   0   73.69   84.99
  14  17   0  349.77  128.99
  14  17   0  -33.10   81.09
 -15 -17   0  129.59   92.59
 -15 -17   0  239.18  167.58
  15  17   0  254.47  127.59
  15  17   0 -113.89   92.29
 -16 -17   0  259.67  174.38
  16  17   0  290.67  140.99
  24 -18   0   29.20  103.49
  23 -18   0   -5.50   97.79
  22 -18   0   10.30  104.89
  22 -18   0 -209.78  110.49
  21 -18   0    7.70   86.99
  21 -18   0  -50.79  104.49
  20 -18   0  101.79   98.49
  20 -18   0  -15.20   79.99
  19 -18   0 -112.89   85.39
  19 -18   0    0.90   71.39
  18 -18   0   57.49   66.99
  18 -18   0  135.99   87.29
  17 -18   0  -63.39   58.09
  17 -18   0  116.19   81.59
  16 -18   0  113.59   75.69
  16 -18   0  -46.40   55.69
  16 -18   0   52.89   78.49
  15 -18   0   62.89   55.59
  15 -18   0   70.79   76.99
  14 -18   0    3.70   49.50
  14 -18   0  -20.90   69.29
  13 -18   0  322.17   72.99
  12 -18   0   22.90   61.69
  12 -18   0   45.10   42.70
  11 -18   0   48.30   55.99
  11 -18   0   84.79   45.20
 -11  18   0  197.48   64.09
  10 -18   0   61.69   55.99
  10 -18   0   71.29   42.40
 -10  18   0   44.00   59.99
   9 -18   0   38.20   39.40
   9 -18   0   45.30   50.89
   9 -18   0    3.10   52.09
  -9  18   0   22.00   52.09
   8 -18   0  -56.79   47.10
   8 -18   0    2.70   39.20
   8 -18   0  -41.70   60.19
   8 -18   0   -3.20   48.20
  -8  18   0   -3.50   36.30
  -8  18   0  -59.09   51.89
   7 -18   0  111.09   45.60
   7 -18   0   54.39   61.89
   7 -18   0  121.19   52.79
   7 -18   0   -9.90   45.00
  -7  18   0  120.89   37.80
  -7  18   0   29.40   54.59
   6 -18   0   49.40   58.19
   6 -18   0   98.29   52.59
   6 -18   0  -10.90   42.20
   6 -18   0  -19.40   40.20
  -6  18   0   95.19   34.90
  -6  18   0   44.50   49.70
   5 -18   0   -1.80   56.99
   5 -18   0    4.20   38.80
   5 -18   0  -59.89   37.80
   5 -18   0  -28.70   47.20
  -5  18   0    5.50   32.80
  -5  18   0   21.80   51.09
   4 -18   0   -8.10   48.00
   4 -18   0  -49.20   37.90
  -4  18   0  -75.39   46.70
  -4  18   0   19.60   33.20
   3 -18   0    4.00   39.10
   3 -18   0  -46.10   46.90
  -3  18   0  -69.09   47.70
  -3  18   0  -19.20   32.70
   2 -18   0   11.10   39.00
   2 -18   0  -59.79   35.40
   2 -18   0   -1.20   48.30
  -2  18   0   49.10   52.09
  -2  18   0   49.10   34.10
   1 -18   0  164.48   41.90
   1 -18   0  144.29   47.00
   1 -18   0  189.48   54.39
  -1  18   0   90.89   58.29
  -1  18   0  144.49   36.50
   0 -18   0   57.59   40.50
   0 -18   0   -3.40   48.90
   0 -18   0   20.30   43.10
   0  18   0   38.10   35.70
   0  18   0   91.39   55.69
   0  18   0   38.50   55.39
  -1 -18   0   25.30   42.00
  -1 -18   0   72.99   47.70
  -1 -18   0  100.39   54.89
   1  18   0   50.79   36.00
   1  18   0   85.79   57.39
   1  18   0   58.79   59.89
  -2 -18   0  -29.20   44.60
  -2 -18   0   20.30   54.59
  -2 -18   0   20.20   43.90
   2  18   0    4.00   58.29
   2  18   0   91.19   56.39
   2  18   0  -18.00   35.90
  -3 -18   0   69.69   51.89
  -3 -18   0  189.68   62.49
  -3 -18   0   98.59   47.60
   3  18   0  193.28   67.79
   3  18   0   63.49   61.19
   3  18   0  145.39   41.20
  -4 -18   0   -8.20   58.69
  -4 -18   0    4.90   48.60
  -4 -18   0   13.20   47.40
   4  18   0   41.10   42.50
   4  18   0   57.59   64.69
   4  18   0  -23.80   62.39
  -5 -18   0   27.30   61.59
  -5 -18   0  -26.70   48.30
   5  18   0  -30.10   65.19
   5  18   0   20.80   43.60
  -6 -18   0   57.29   69.99
  -6 -18   0  -45.70   55.79
   6  18   0  -13.60   73.49
   6  18   0  -97.69   44.30
  -7 -18   0   -2.20   55.79
  -7 -18   0  216.68   68.49
   7  18   0   56.79   50.69
   7  18   0  136.09   81.69
  -8 -18   0   54.89   74.99
  -8 -18   0   15.80   58.29
   8  18   0  -98.39   49.90
   8  18   0   52.79   82.89
  -9 -18   0  -22.50   81.49
  -9 -18   0  -30.70   59.29
   9  18   0   -9.70   54.79
   9  18   0   68.49  116.09
 -10 -18   0  104.99   95.49
 -10 -18   0  -23.10   64.69
  10  18   0   39.50  104.39
  10  18   0 -126.89   58.39
 -11 -18   0  191.38  102.69
  11  18   0 -136.69   64.79
  11  18   0  -44.10  104.29
 -12 -18   0   18.50   78.59
 -12 -18   0  191.38  111.19
  12  18   0 -194.68  103.29
 -13 -18   0   -0.30   84.09
 -13 -18   0  218.98  139.09
  13  18   0 -104.39   80.79
  13  18   0  172.38  122.09
 -14 -18   0  199.78  140.39
  14  18   0  137.49  145.59
 -15 -18   0  133.39  148.99
 -15 -18   0  -70.29   96.99
  15  18   0 -179.68   97.19
  15  18   0  153.28  138.69
  24 -19   0  -14.40  108.49
  23 -19   0  -86.59   97.79
  22 -19   0  -15.90  101.49
  22 -19   0 -234.98  121.69
  21 -19   0  144.69  106.59
  21 -19   0  -87.09  114.29
  20 -19   0  -69.39  100.29
  19 -19   0   69.29   97.19
  19 -19   0   54.69   76.19
  18 -19   0  107.59   71.59
  18 -19   0 -112.79   89.79
  18 -19   0  124.99   96.09
  17 -19   0  -24.10   83.79
  17 -19   0  -66.09   86.59
  17 -19   0  -16.40   65.99
  16 -19   0  104.79   81.19
  16 -19   0  -75.29   58.49
  15 -19   0  -49.80   74.59
  15 -19   0  123.39   57.69
  15 -19   0  -33.80   52.99
  14 -19   0   43.00   50.29
  14 -19   0  -46.40   70.19
  13 -19   0  -62.59   63.79
  13 -19   0   53.29   49.00
  12 -19   0   75.29   65.89
  12 -19   0  158.58   52.39
  11 -19   0  -26.00   44.40
  11 -19   0    4.00   61.19
 -11  19   0  120.49   62.99
  10 -19   0  160.08   50.49
  10 -19   0  318.77   65.59
 -10  19   0  296.37   71.29
   9 -19   0  133.19   60.49
   9 -19   0  169.78   49.30
  -9  19   0  155.38   59.69
   8 -19   0  -14.00   53.59
   8 -19   0   27.90   54.29
   8 -19   0   -7.40   41.90
  -8  19   0  -55.49   56.59
  -8  19   0   -6.60   39.80
   7 -19   0  -16.60   45.20
   7 -19   0 -116.19   47.60
   7 -19   0  -83.99   52.89
   7 -19   0   39.60   68.59
  -7  19   0    0.60   54.79
  -7  19   0   84.19   39.40
   6 -19   0  156.48   59.29
   6 -19   0  126.19   48.60
   6 -19   0  134.89   47.90
   6 -19   0  224.88   69.29
  -6  19   0  257.17   43.90
  -6  19   0  295.77   69.49
   5 -19   0    2.10   54.39
   5 -19   0    0.40   41.50
   5 -19   0  -58.39   61.69
   5 -19   0  -23.50   44.70
  -5  19   0    0.10   55.49
  -5  19   0  102.49   39.40
   4 -19   0   45.20   41.00
   4 -19   0  -18.60   52.49
   4 -19   0   33.70   61.69
   4 -19   0  -68.29   42.20
  -4  19   0   66.69   60.49
  -4  19   0   27.70   34.80
   3 -19   0   40.30   44.10
   3 -19   0  -61.89   40.40
   3 -19   0   21.70   53.69
  -3  19   0  -16.00   53.39
  -3  19   0   71.99   36.50
   2 -19   0   17.50   43.50
   2 -19   0   13.20   44.90
   2 -19   0   -6.10   52.69
  -2  19   0    2.70   34.30
  -2  19   0   -0.20   53.19
   1 -19   0   90.59   56.29
   1 -19   0  -14.20   46.60
   1 -19   0   14.00   45.10
  -1  19   0   62.49   61.99
  -1  19   0   32.60   37.30
   0 -19   0  -60.89   44.10
   0 -19   0  -61.59   54.69
   0 -19   0  -60.19   44.50
   0  19   0   37.10   38.50
   0  19   0   28.20   59.99
  -1 -19   0  135.19   63.09
  -1 -19   0   26.30   46.90
  -1 -19   0   -4.40   50.89
   1  19   0  139.39   59.99
   1  19   0   57.09   39.00
   1  19   0   21.70   63.09
  -2 -19   0  -17.60   50.49
  -2 -19   0  -23.00   50.39
  -2 -19   0   46.60   58.89
   2  19   0   33.10   65.09
   2  19   0    9.40   67.19
   2  19   0   36.20   40.40
  -3 -19   0  -79.49   47.50
  -3 -19   0  -73.89   58.99
   3  19   0  -85.29   41.10
   3  19   0  -26.40   65.89
  -4 -19   0   37.60   66.19
  -4 -19   0  -51.09   50.59
   4  19   0  139.69   74.49
   4  19   0   54.19   47.60
  -5 -19   0   36.80   68.19
  -5 -19   0  -22.10   53.79
   5  19   0  -42.00   46.80
   5  19   0  -77.29   70.29
  -6 -19   0  -77.89   58.29
  -6 -19   0   -0.70   73.79
   6  19   0   52.99   81.69
  -7 -19   0  -69.49   64.69
  -7 -19   0  134.19   74.99
   7  19   0 -100.49   53.19
  -8 -19   0  -89.29   60.39
  -8 -19   0   91.79   84.89
   8  19   0  -25.10   57.69
   8  19   0  -32.70   85.49
  -9 -19   0   56.39   93.49
   9  19   0  -88.59   61.09
   9  19   0   98.09   97.89
 -10 -19   0   59.19   74.09
 -10 -19   0  151.88  106.89
  10  19   0  131.69  106.99
 -11 -19   0  -46.50   79.69
 -11 -19   0   69.29  108.59
  11  19   0  162.78  111.19
  11  19   0  -92.29   69.29
 -12 -19   0 -130.49   80.89
 -12 -19   0   95.29  119.69
  12  19   0  163.58  135.19
 -13 -19   0   20.10   91.19
 -13 -19   0   49.10  148.79
  13  19   0  107.69  128.09
  13  19   0 -128.29   82.39
 -14 -19   0 -227.38   92.19
  14  19   0  -49.99  135.39
  23 -20   0  -10.70  107.39
  22 -20   0 -114.89  104.49
  22 -20   0 -171.58  129.89
  22 -20   0  156.78  146.19
  22 -20   0  -40.30   93.39
  21 -20   0  181.08  128.79
  21 -20   0  318.67  128.99
  21 -20   0  -57.29  100.99
  21 -20   0   67.99   92.59
  20 -20   0  634.94  133.89
  20 -20   0  211.68   90.99
  20 -20   0  359.06  123.59
  19 -20   0  200.38  116.69
  19 -20   0  113.89  111.59
  19 -20   0   24.70   77.69
  19 -20   0  178.08   89.49
  18 -20   0  -57.19  101.49
  18 -20   0   82.59  102.09
  18 -20   0    8.80   76.19
  18 -20   0   33.40   77.89
  17 -20   0  209.38   99.09
  17 -20   0  -11.10   92.39
  17 -20   0  -28.50   59.89
  17 -20   0  -14.10   70.49
  16 -20   0  101.99   67.89
  16 -20   0  142.19   67.39
  16 -20   0  -27.90   82.89
  15 -20   0   48.30   61.29
  15 -20   0  -15.40   58.99
  15 -20   0  -47.50   77.89
  14 -20   0 -113.09   53.09
  14 -20   0  -34.20   76.19
  14 -20   0  -50.19   53.89
  13 -20   0   22.40   56.09
  13 -20   0   66.39   73.19
  12 -20   0  -24.60   50.59
  12 -20   0   72.19   68.79
  11 -20   0  191.28   70.29
  11 -20   0  177.88   57.79
 -11  20   0  295.97   75.89
  10 -20   0   66.09   63.19
  10 -20   0   29.00   54.79
 -10  20   0   89.69   69.99
   9 -20   0  -30.50   58.49
   9 -20   0   23.00   47.40
  -9  20   0   41.70   63.19
   8 -20   0  -54.79   59.69
   8 -20   0  -31.80   67.09
   8 -20   0   10.50   45.80
  -8  20   0  -20.60   59.69
   7 -20   0  298.47   59.69
   7 -20   0  336.77   62.79
   7 -20   0  541.05   82.19
   6 -20   0  200.28   74.39
   6 -20   0  101.89   53.09
   6 -20   0  -26.10   50.89
   6 -20   0   54.59   59.99
  -6  20   0  166.78   64.69
  -6  20   0  223.28   44.90
   5 -20   0  -58.79   47.00
   5 -20   0   35.50   44.60
   5 -20   0   81.79   72.49
   5 -20   0  -52.89   57.39
  -5  20   0  184.38   61.99
  -5  20   0  180.28   43.20
   4 -20   0   37.40   46.00
   4 -20   0  -10.30   69.09
   4 -20   0  -21.50   46.20
   4 -20   0  -18.80   59.99
  -4  20   0   61.79   64.59
  -4  20   0  103.89   39.60
   3 -20   0   54.09   62.09
   3 -20   0  -29.20   46.80
   3 -20   0  -45.00   47.70
  -3  20   0   20.50   38.60
  -3  20   0   -6.20   64.89
   2 -20   0   52.99   49.50
   2 -20   0  195.08   66.09
   2 -20   0   66.59   54.59
  -2  20   0  178.98   69.99
  -2  20   0  157.78   43.40
   1 -20   0   -6.20   57.79
   1 -20   0  -43.20   48.80
  -1  20   0  -29.50   61.09
  -1  20   0   16.70   38.80
   0 -20   0   -4.70   53.19
   0 -20   0  -37.90   60.59
   0  20   0  -41.20   37.80
   0  20   0  -79.69   68.39
  -1 -20   0   24.80   63.19
  -1 -20   0  -29.90   56.19
   1  20   0   -4.60   70.39
   1  20   0  -40.10   41.90
  -2 -20   0   83.89   65.19
  -2 -20   0   46.00   57.29
   2  20   0  -26.70   43.40
   2  20   0   90.49   75.79
  -3 -20   0    8.50   55.39
  -3 -20   0  190.58   71.79
   3  20   0  169.28   85.59
   3  20   0   32.00   48.00
  -4 -20   0  -78.29   54.19
  -4 -20   0   -2.80   69.59
   4  20   0   44.90  103.59
   4  20   0  -55.79   47.60
  -5 -20   0  177.38   81.89
  -5 -20   0   42.40   62.99
   5  20   0   -2.60   51.19
   5  20   0   74.59   96.59
  -6 -20   0  -57.79   67.49
  -6 -20   0    1.70   78.69
   6  20   0   76.49   57.49
   6  20   0   47.90   96.09
  -7 -20   0   97.09   87.39
  -7 -20   0   83.69   99.19
   7  20   0   14.90   59.59
   7  20   0   67.29   92.49
  -8 -20   0  -76.09   74.99
  -8 -20   0   83.49   92.69
   8  20   0   34.20   95.49
   8  20   0  -28.50   61.29
  -9 -20   0  -84.59   70.59
  -9 -20   0  169.18  107.49
   9  20   0   43.60   98.69
   9  20   0  -85.79   66.79
 -10 -20   0  -41.60   78.99
 -10 -20   0  147.99  116.39
  10  20   0  124.99  112.09
  10  20   0  -95.39   74.99
 -11 -20   0  -37.50  123.69
 -11 -20   0  -38.00   88.19
  11  20   0  -41.40   80.99
  11  20   0  238.38  126.59
 -12 -20   0   66.79   96.89
 -12 -20   0  242.18  131.59
  12  20   0 -155.58   93.09
  12  20   0  -32.10  127.29
 -13 -20   0 -140.09   98.49
  13  20   0   53.19  160.58
  22 -21   0 -125.29   99.69
  22 -21   0  162.28  128.89
  22 -21   0   33.20  153.28
  21 -21   0   41.30  111.49
  21 -21   0  131.59  178.68
  21 -21   0  347.67  143.09
  20 -21   0  119.09  120.49
  20 -21   0  256.37  129.39
  20 -21   0  129.69  106.89
  19 -21   0  156.88   98.39
  19 -21   0  296.17  121.79
  19 -21   0  345.97  120.89
  19 -21   0  178.08   86.39
  18 -21   0  -47.00   84.09
  18 -21   0  116.39  116.19
  18 -21   0   19.60   74.29
  17 -21   0  -92.19   99.99
  17 -21   0   85.49   76.19
  17 -21   0   35.90   77.29
  17 -21   0   65.59  105.39
  16 -21   0   11.20   92.49
  16 -21   0   96.89   74.09
  16 -21   0   30.20   67.89
  15 -21   0  -54.99   85.49
  15 -21   0   -7.60   67.49
  15 -21   0   39.40   69.19
  14 -21   0   47.70   81.89
  14 -21   0   -0.50   60.29
  14 -21   0   30.80   61.09
  13 -21   0  230.48   85.69
  13 -21   0  143.69   59.69
  12 -21   0 -128.99   69.99
  12 -21   0  -25.80   54.69
  11 -21   0  145.79   73.89
  11 -21   0   77.99   55.99
 -11  21   0  173.68   75.99
  10 -21   0   59.89   69.89
  10 -21   0   65.59   56.49
 -10  21   0  253.87   79.69
   9 -21   0   14.70   69.19
   9 -21   0   22.00   53.19
  -9  21   0  165.48   73.19
   8 -21   0  -19.70   49.20
   8 -21   0   25.80   66.89
  -8  21   0   30.20   68.09
  -7  21   0  466.05   87.59
  -7  21   0  669.13   77.59
   6 -21   0  739.83   93.39
   6 -21   0  799.12   95.39
  -6  21   0 1055.29   80.59
  -6  21   0  953.60  105.99
   5 -21   0  151.68   54.49
   5 -21   0  158.28   68.89
  -5  21   0  264.87   49.40
  -5  21   0  206.68   71.09
   4 -21   0   14.30   48.60
   4 -21   0   40.00   64.09
  -4  21   0   95.29   42.60
  -4  21   0   78.49   66.69
   3 -21   0  389.96   74.89
   3 -21   0  280.07   63.89
  -3  21   0  396.46   51.59
  -3  21   0  488.95   92.29
   2 -21   0   -9.70   64.59
   2 -21   0   84.39   54.09
  -2  21   0   83.89   43.80
  -2  21   0   82.19   69.89
   1 -21   0   56.59   61.89
   1 -21   0   30.50   64.39
  -1  21   0   -9.50   69.29
  -1  21   0   17.60   43.20
   0 -21   0   18.90   67.19
   0 -21   0   47.50   58.09
   0  21   0  -26.40   72.89
   0  21   0  -12.00   44.00
  -1 -21   0  164.68   68.89
  -1 -21   0  319.17   75.09
   1  21   0  195.98   49.70
  -2 -21   0  162.58   70.09
  -2 -21   0  179.38   76.79
   2  21   0   58.59   49.00
   2  21   0  186.38   90.69
  -3 -21   0   83.59   77.09
  -3 -21   0   19.20   62.79
   3  21   0   33.80   80.89
   3  21   0   37.50   49.00
  -4 -21   0  442.86   86.39
   4  21   0  275.47   57.49
   4  21   0  402.26  100.29
  -5 -21   0  315.97   89.09
  -5 -21   0  192.88   76.69
   5  21   0  171.58   58.69
   5  21   0  140.99  103.89
  -6 -21   0   25.30   75.39
  -6 -21   0   26.80   84.19
   6  21   0   19.60   60.09
   6  21   0  -10.00   95.49
  -7 -21   0   44.90   77.49
  -7 -21   0  165.98   92.69
   7  21   0   32.60  102.59
   7  21   0   71.89   66.09
  -8 -21   0   -2.70   80.49
  -8 -21   0  128.59  103.99
   8  21   0  -46.70  112.99
   8  21   0  -42.10   70.89
  -9 -21   0  -60.49   81.59
  -9 -21   0  182.38  114.39
   9  21   0   89.69  134.89
   9  21   0   35.80   85.29
 -10 -21   0  -48.10   86.19
  10  21   0   65.69  145.99
 -11 -21   0  -60.29   97.79
  11  21   0  161.38  147.39
 -12 -21   0   32.60  104.79
  12  21   0  -25.10  138.49
  21 -22   0   36.90  102.59
  21 -22   0    4.10  143.49
  21 -22   0  199.68  153.58
  21 -22   0  100.39  122.59
  20 -22   0  156.38   98.49
  20 -22   0  273.77  143.99
  20 -22   0  142.99   98.49
  20 -22   0  280.27  138.99
  19 -22   0   22.80  121.49
  19 -22   0  -85.59  121.29
  19 -22   0  203.38   94.19
  18 -22   0   38.70   87.89
  18 -22   0   18.30  121.19
  18 -22   0  -16.40  152.78
  17 -22   0   67.89   79.59
  17 -22   0 -110.59  106.99
  16 -22   0 -100.09   72.89
  16 -22   0 -119.29  103.39
  16 -22   0   79.09   71.19
  15 -22   0  -20.50   67.39
  15 -22   0   78.69   71.99
  15 -22   0  -30.00   96.69
  14 -22   0   40.70   63.39
  14 -22   0  -78.29   68.19
  14 -22   0  -11.20   89.09
  13 -22   0   19.50   84.99
  13 -22   0  -30.50   58.79
  12 -22   0   73.39   83.79
  12 -22   0  168.58   65.99
  11 -22   0    5.20   58.09
  11 -22   0   88.39   78.29
 -11  22   0  204.38   81.79
  10 -22   0  209.88   80.19
  10 -22   0  295.87   67.39
 -10  22   0  267.77   91.69
   9 -22   0  142.49   62.09
   9 -22   0  166.68   79.29
  -9  22   0  235.88   82.19
   8 -22   0   51.79   59.69
   8 -22   0  -15.90   72.89
  -8  22   0  169.68   78.29
   7 -22   0  373.56   69.69
   7 -22   0  429.96   82.69
  -7  22   0  515.75   91.09
  -7  22   0  595.34   78.19
   6 -22   0   27.10   70.49
   6 -22   0  162.48   59.49
  -6  22   0  141.59   54.09
  -6  22   0  133.09   77.99
   5 -22   0  335.87   68.79
   5 -22   0  418.06   79.39
  -5  22   0  357.96   57.39
  -5  22   0  513.15  105.49
   4 -22   0  639.54   85.59
  -4  22   0  670.43  143.59
  -4  22   0  845.32   77.19
   3 -22   0  -30.60   67.49
   3 -22   0   91.89   58.89
  -3  22   0  235.08   48.40
   2 -22   0  648.34   87.39
   2 -22   0  339.37   70.49
  -2  22   0  452.75  102.39
  -2  22   0  612.54   73.59
   1 -22   0   83.39   76.89
   1 -22   0   -0.60   56.59
  -1  22   0   56.39   46.10
  -1  22   0  -10.70   77.89
   0 -22   0   89.39   77.09
   0 -22   0   -7.30   66.19
   0  22   0   58.09   47.80
   0  22   0  -94.99   75.39
  -1 -22   0  113.09   78.59
   1  22   0    3.50   83.19
   1  22   0   53.79   49.70
  -2 -22   0  -17.90   69.79
  -2 -22   0   26.50   80.29
   2  22   0   54.29   53.29
   2  22   0   99.79   85.19
  -3 -22   0  353.56   85.99
  -3 -22   0  246.08   77.19
   3  22   0  227.08   94.59
  -4 -22   0  111.19   73.99
  -4 -22   0  387.66   92.69
   4  22   0  292.07  119.79
   4  22   0  336.67   64.39
  -5 -22   0  162.78   78.79
  -5 -22   0  448.26  101.09
   5  22   0  203.38   71.39
   5  22   0  178.48  102.49
  -6 -22   0 -130.09   77.29
  -6 -22   0  228.58  109.39
   6  22   0   99.29  117.39
  -7 -22   0  288.47  119.59
  -7 -22   0   69.59   87.69
   7  22   0  -53.39  112.59
  -8 -22   0   10.30   92.09
   8  22   0   42.00  116.29
  -9 -22   0 -151.88   91.09
   9  22   0  119.69  131.69
 -10 -22   0   43.20  102.39
  10  22   0  104.39  137.79
  20 -23   0    6.00  142.79
  20 -23   0  -60.49  114.19
  20 -23   0   97.99  103.09
  20 -23   0  171.58  149.49
  19 -23   0  251.97  143.39
  19 -23   0 -110.29  134.59
  19 -23   0   19.00  107.89
  19 -23   0    6.60   97.59
  18 -23   0    6.60  125.19
  18 -23   0  -52.29   97.09
  18 -23   0  -49.80  125.59
  18 -23   0   46.00   84.99
  17 -23   0   82.49   79.89
  17 -23   0   99.19   94.29
  16 -23   0 -161.58  103.69
  16 -23   0  -63.69   75.09
  16 -23   0  -15.80   84.39
  15 -23   0    2.70   75.79
  15 -23   0    7.40  101.19
  15 -23   0   35.80   80.19
  14 -23   0    1.30   95.49
  14 -23   0  100.29   73.39
  14 -23   0 -195.18   74.59
  13 -23   0   24.70   90.09
  12 -23   0  -67.99   88.79
  11 -23   0  222.48  105.89
  11 -23   0  -17.40   84.99
 -11  23   0  152.58   93.19
  10 -23   0   84.09   72.29
  10 -23   0  -88.89   81.99
 -10  23   0  -25.00   82.59
   9 -23   0  -72.19   79.69
   9 -23   0  -17.50   60.59
  -9  23   0  118.29   87.89
   8 -23   0   52.49   74.09
   8 -23   0  -57.09   75.09
  -8  23   0  -50.89   81.99
   7 -23   0  -58.69   61.79
   7 -23   0 -163.88   74.59
  -7  23   0   75.29   78.99
   6 -23   0  140.89   78.29
   6 -23   0  196.88   82.59
  -6  23   0  274.77   89.59
  -6  23   0  251.27   59.09
   5 -23   0   99.59   77.49
   5 -23   0   90.29   79.69
  -5  23   0  225.08   90.79
  -5  23   0  340.67   62.09
   4 -23   0  -50.59   74.19
  -4  23   0  118.59   55.29
  -4  23   0   55.49   78.19
   3 -23   0  170.38   74.49
   3 -23   0  226.68   81.29
  -3  23   0  444.96  109.09
  -3  23   0  287.27   55.49
   2 -23   0  106.79   80.09
   2 -23   0   81.09   74.69
  -2  23   0  172.48   54.29
  -2  23   0  171.68   85.89
   1 -23   0    9.90   63.69
   1 -23   0  272.27   83.89
  -1  23   0  118.09   54.59
  -1  23   0   88.59   90.79
   0 -23   0  292.87   82.49
   0 -23   0    3.80   71.79
   0  23   0   63.49   85.89
   0  23   0   45.50   55.99
  -1 -23   0  110.89   85.09
  -1 -23   0  -26.10   66.59
   1  23   0  100.89   91.29
  -2 -23   0  373.56   94.09
  -2 -23   0  -44.30   70.59
   2  23   0   99.99   95.49
  -3 -23   0  124.39   76.09
   3  23   0  232.78  118.39
  -4 -23   0  211.98   83.19
   4  23   0  403.06  115.69
  -5 -23   0  208.78   87.79
   5  23   0  342.97  119.39
  -6 -23   0 -198.48   81.79
   6  23   0   92.59  120.29
  -7 -23   0  -78.89   94.89
   7  23   0    1.00  120.89
  -8 -23   0 -125.69   96.99
   8  23   0    5.20  134.89
  -9 -23   0  -12.40  113.19
   9  23   0  258.07  169.18
  19 -24   0  -29.20  151.58
  19 -24   0   69.69  114.59
  19 -24   0   72.09  152.08
  19 -24   0 -174.68  100.29
  18 -24   0  115.09  102.89
  18 -24   0  188.18  146.59
  18 -24   0   26.20  131.69
  17 -24   0  202.28   96.79
  17 -24   0  152.68   92.09
  17 -24   0   95.59  130.29
  16 -24   0   57.29   89.39
  16 -24   0   96.59   96.29
  16 -24   0   -6.20  119.19
  15 -24   0  -24.10   82.39
  15 -24   0  -80.19   79.99
  15 -24   0 -206.48  111.19
  14 -24   0  -54.89  101.99
  14 -24   0   -7.10   72.79
  14 -24   0  -69.69   78.39
  13 -24   0  -59.79  101.99
  13 -24   0   22.30   71.89
  12 -24   0  -90.69   97.09
  12 -24   0  -53.89   67.79
  11 -24   0   20.60   95.39
  11 -24   0  -84.89   62.69
 -11  24   0  112.89   99.79
  10 -24   0  -31.50   90.69
  10 -24   0  -55.09   66.19
 -10  24   0  -63.19   90.99
   9 -24   0 -116.49   83.19
   9 -24   0  123.89   71.39
  -9  24   0   40.70   91.19
   8 -24   0   40.80   70.79
   8 -24   0 -179.68   83.09
  -8  24   0    3.20   90.89
   7 -24   0   34.40   69.89
   7 -24   0  -41.40   82.59
  -7  24   0  106.19   98.39
   6 -24   0  -19.20   66.69
   6 -24   0  -77.89   82.09
  -6  24   0  -50.29   83.89
  -6  24   0   78.79   64.49
   5 -24   0   75.19   84.49
   5 -24   0   98.89   66.29
  -5  24   0  247.38   99.49
  -5  24   0  273.77   72.99
   4 -24   0   18.10   83.39
   4 -24   0    3.80   72.09
  -4  24   0  -40.90   83.39
   3 -24   0  -20.30   83.19
   3 -24   0  -88.39   70.99
  -3  24   0   75.89   93.49
   2 -24   0  -51.39   77.59
   2 -24   0   -8.50   84.89
  -2  24   0  -17.90   86.29
   1 -24   0  239.78   92.69
   1 -24   0   10.30   81.29
  -1  24   0  153.98   93.69
   0 -24   0   -1.70   70.19
   0  24   0   -0.80   86.89
  -1 -24   0  131.79   76.79
   1  24   0  165.48  108.59
  -2 -24   0   14.20   83.59
   2  24   0   94.89  123.19
  -3 -24   0   -9.00   76.29
   3  24   0  140.29  112.79
  -4 -24   0 -108.19   88.79
   4  24   0   -2.40  115.49
  -5 -24   0   -6.00   96.99
   5  24   0  166.18  121.49
  -6 -24   0  -53.69   96.59
   6  24   0  145.09  154.58
  -7 -24   0  -97.49  100.29
   7  24   0   23.00  134.49
  18 -25   0  229.78  160.28
  18 -25   0  147.49  114.79
  18 -25   0   73.99  151.88
  17 -25   0 -128.69  141.99
  17 -25   0   27.00  105.39
  17 -25   0   16.50   94.99
  16 -25   0  209.58  100.29
  16 -25   0  204.58  145.29
  16 -25   0   82.29  100.39
  15 -25   0  178.78   92.09
  15 -25   0   58.49  122.09
  15 -25   0   -1.50   85.09
  14 -25   0   77.19   85.29
  14 -25   0   85.29   87.09
  14 -25   0  -81.29  115.79
  13 -25   0 -111.69   79.49
  13 -25   0 -200.38  108.49
  13 -25   0  -26.60   83.59
  12 -25   0  -95.79  108.39
  12 -25   0   -4.00   81.89
  11 -25   0 -209.68   98.49
  11 -25   0  -39.00   71.19
 -11  25   0   38.20  105.99
  10 -25   0  244.28   84.39
  10 -25   0   67.49  101.99
 -10  25   0  432.26  125.99
   9 -25   0 -113.79   93.39
   9 -25   0   -6.50   74.29
  -9  25   0  101.39  107.19
   8 -25   0 -121.49   72.79
   8 -25   0 -177.58   87.69
  -8  25   0   28.00  100.19
   7 -25   0  -22.60   74.39
   7 -25   0  -96.19   87.59
  -7  25   0  -95.69   94.29
   6 -25   0  153.88   80.59
   6 -25   0 -124.49   89.89
  -6  25   0   37.10  105.09
   5 -25   0 -176.88   97.09
   5 -25   0   11.90   75.59
  -5  25   0 -103.09   92.99
   4 -25   0  -62.89   80.69
  -4  25   0   -5.00  101.09
   3 -25   0   56.09   81.59
  -3  25   0   62.69  113.49
   2 -25   0 -176.98   81.79
  -2  25   0   67.29  112.29
   1 -25   0 -106.29   82.59
  -1  25   0  239.48  116.99
   0 -25   0  -29.20   86.49
   0  25   0  -17.00  110.49
  -1 -25   0  133.99   84.49
   1  25   0   38.50  128.39
  -2 -25   0  -15.30   90.19
   2  25   0  120.39  116.99
  -3 -25   0   19.70   97.19
   3  25   0   63.49  120.49
  -4 -25   0  -71.39  106.89
   4  25   0  126.89  134.49
  -5 -25   0  -95.29  106.39
   5  25   0  306.07  149.09
  16 -26   0  -21.90  142.99
  16 -26   0   16.00  102.89
  15 -26   0  118.49   99.09
  14 -26   0  -97.89   95.59
  14 -26   0 -132.19  124.69
  13 -26   0 -121.09   80.19
  13 -26   0 -205.68  119.99
  12 -26   0 -103.59   82.99
  11 -26   0  193.68   89.29
 -11  26   0   13.30  117.39
  10 -26   0 -175.78  141.39
  10 -26   0  -92.59   79.19
 -10  26   0   39.20  120.29
   9 -26   0   -3.40   80.39
  -9  26   0   56.59  118.09
   8 -26   0   74.99   78.39
  -8  26   0   83.99  121.39
   7 -26   0   40.30   77.19
  -7  26   0  -51.39  108.49
   6 -26   0  -57.19   82.39
  -6  26   0  -53.69  108.69
   5 -26   0   -2.70   93.59
  -5  26   0   95.79  108.59
   4 -26   0   56.79   85.29
  -4  26   0  -14.10  112.59
   3 -26   0  -67.99   91.99
  -3  26   0  -35.10  127.99
   2 -26   0 -147.39   87.99
  -2  26   0   67.09  114.29
   1 -26   0   48.20  100.59
  -1  26   0   74.49  122.59
   0 -26   0  -63.19  100.99
   0  26   0   -7.50  127.49
  -1 -26   0   -9.00   99.59
   1  26   0   64.89  121.19
  -2 -26   0   19.50   98.99
   2  26   0   74.99  121.69
  -3 -26   0 -119.49  105.79
   3  26   0   11.80  156.88
  13 -27   0 -143.69   95.59
  12 -27   0   86.59   96.19
  11 -27   0  -15.00   91.49
  10 -27   0  -55.59   89.09
 -10  27   0  -19.10  126.99
   9 -27   0    5.10   91.49
  -9  27   0  -43.60  127.09
   8 -27   0   34.60   90.19
  -8  27   0 -161.78  123.19
   7 -27   0  109.79   92.89
  -7  27   0   50.89  127.19
   6 -27   0  161.88   96.59
  -6  27   0   23.90  127.39
   5 -27   0  102.49   95.89
  -5  27   0   85.19  120.89
   4 -27   0  -45.90  105.89
  -4  27   0   74.09  131.99
   3 -27   0    5.40   97.19
  -3  27   0  146.19  137.49
   2 -27   0   42.50  108.59
  -2  27   0  -25.30  134.89
   1 -27   0  -44.40   99.39
  -1  27   0  252.97  162.28
   0 -27   0  104.49  100.79
   0  27   0  104.99  133.19
   8 -28   0 -149.59  110.29
  -8  28   0  146.89  149.19
   7 -28   0 -150.28  100.99
  -7  28   0  245.78  143.29
   6 -28   0  -30.80  110.39
  -6  28   0   -9.90  138.59
  -5  28  -1  189.38  142.29
  -6  28  -1  169.68  141.69
   6 -28   1  170.08  122.29
  -7  28  -1  167.68  150.18
   7 -28   1   -4.00  106.89
  -8  28  -1  162.28  146.39
   8 -28   1   -5.90  103.79
   0  27  -1   99.69  134.79
   0 -27   1   91.99  115.59
  -1  27  -1  -36.20  120.69
   1 -27   1  -46.40  108.69
  -2  27  -1 -119.79  120.79
   2 -27   1  -21.80  104.99
  -3  27  -1 -104.89  118.49
   3 -27   1  -21.40   95.79
  -4  27  -1   68.89  124.49
   4 -27   1   -7.10   96.59
  -5  27  -1  151.38  128.09
   5 -27   1   57.99   98.89
  -6  27  -1   10.80  133.69
   6 -27   1  123.49   99.99
  -7  27  -1  181.18  130.49
   7 -27   1   53.69   93.49
  -8  27  -1   48.60  136.89
   8 -27   1  -83.89   90.29
  -9  27  -1  -64.79  126.39
   9 -27   1  138.59   95.19
 -10  27  -1   74.39  129.19
  10 -27   1   44.20   92.59
  11 -27   1  -12.60   90.19
  12 -27   1    7.30   95.39
  13 -27   1   29.30  110.89
   3  26  -1  190.58  130.39
  -3 -26   1   98.99  101.09
   2  26  -1   55.99  131.79
  -2 -26   1   67.29  100.89
   1  26  -1   80.59  122.09
  -1 -26   1 -205.08   98.79
   0  26  -1  139.59  116.29
   0 -26   1  -13.90   99.89
  -1  26  -1  127.19  121.49
   1 -26   1  -34.90   84.49
  -2  26  -1   23.40  115.39
   2 -26   1  119.29  100.19
  -3  26  -1  168.08  116.79
   3 -26   1 -104.29   95.29
  -4  26  -1  185.98  113.89
   4 -26   1   -3.20   93.09
  -5  26  -1    7.80  110.59
   5 -26   1  -89.59   86.69
  -6  26  -1   -0.70  114.99
   6 -26   1    3.00   90.49
  -7  26  -1  104.39  113.29
   7 -26   1  -59.19   78.89
  -8  26  -1  257.27  123.69
   8 -26   1  -11.20   74.59
  -9  26  -1   -0.60  119.39
   9 -26   1  -76.99   84.79
 -10  26  -1   62.59  116.89
  10 -26   1  -51.09   86.79
  11 -26   1  -27.60   88.69
  12 -26   1  -64.39   91.49
  13 -26   1   66.69   86.39
  14 -26   1  157.58   97.99
  14 -26   1  -16.70  161.58
  15 -26   1   72.39  105.59
  15 -26   1  -59.69  159.18
  16 -26   1  -96.49   96.79
  16 -26   1  -73.99  162.68
   5  25  -1  107.89  138.39
  -5 -25   1   -7.00  110.39
   4  25  -1   30.10  117.49
  -4 -25   1 -149.39   98.19
   3  25  -1   99.09  135.69
  -3 -25   1  -90.29   88.69
   2  25  -1   17.40  106.79
  -2 -25   1   91.89   90.99
   1  25  -1  150.58  109.49
  -1 -25   1   15.00   92.49
   0  25  -1  108.09  113.19
   0 -25   1  -22.30   86.69
  -1  25  -1  109.39  113.49
   1 -25   1  144.39   84.29
  -2  25  -1  110.69  103.09
   2 -25   1 -143.39   74.59
  -3  25  -1   30.30   94.89
   3 -25   1  -16.80   84.19
  -4  25  -1   90.59   97.99
   4 -25   1   97.69   80.39
  -5  25  -1  -27.70   97.39
   5 -25   1   27.50   84.29
  -6  25  -1  -43.90   93.89
   6 -25   1  -74.29   70.89
  -7  25  -1   12.20  102.49
   7 -25   1   62.99   98.39
   7 -25   1   84.89   75.09
  -8  25  -1  147.79  100.49
   8 -25   1  -65.19   73.59
   8 -25   1  -46.80   90.99
  -9  25  -1  212.48  111.59
   9 -25   1   60.79   79.69
   9 -25   1  -58.39   92.09
 -10  25  -1  191.98  107.09
  10 -25   1  -87.39   93.69
  10 -25   1   87.79   76.19
  11 -25   1  217.58   83.19
  11 -25   1  -66.39   97.59
  12 -25   1  -63.69   74.59
  12 -25   1 -102.69  104.29
  13 -25   1   -6.90   78.69
  13 -25   1   63.59  109.59
  14 -25   1  -69.19   79.99
  14 -25   1  117.79  117.99
  14 -25   1 -220.18   91.39
  15 -25   1  115.29  119.89
  15 -25   1   40.00   92.89
  15 -25   1   64.09  105.99
  16 -25   1  -74.99   88.49
  16 -25   1   91.79  113.49
  16 -25   1  -33.60  172.68
  17 -25   1  110.89  105.99
  17 -25   1  129.29  146.19
  18 -25   1  -36.30  116.89
  18 -25   1   36.50  146.99
  18 -25   1   29.90  115.99
  18 -25   1  154.08  153.38
   7  24  -1  136.79  144.39
  -7 -24   1  -10.50  102.19
   6  24  -1  -57.79  122.49
  -6 -24   1   26.00   97.09
   5  24  -1   81.79  124.99
  -5 -24   1  -72.19   91.59
   4  24  -1   58.09  115.39
  -4 -24   1    7.30   95.99
   3  24  -1   88.29  116.69
  -3 -24   1   86.79   83.39
   2  24  -1  321.77  111.89
  -2 -24   1  257.57   83.59
   1  24  -1    7.80  100.39
  -1 -24   1   -5.90   76.89
   0  24  -1   -5.40  101.39
   0 -24   1   -4.70   80.39
  -1  24  -1   74.59  108.49
   1 -24   1  -80.59   78.59
  -2  24  -1  168.08   99.69
   2 -24   1  257.57   91.49
   2 -24   1   66.59   82.29
  -3  24  -1  114.19   89.69
  -3  24  -1  130.99   59.79
   3 -24   1   10.70   71.99
   3 -24   1   73.79   80.89
  -4  24  -1  -19.20   82.49
  -4  24  -1  133.69   64.29
   4 -24   1  -32.90   77.69
   4 -24   1   -9.30   78.79
  -5  24  -1   60.79   92.69
  -5  24  -1  221.88   64.59
   5 -24   1   -3.00   78.69
   5 -24   1  113.69   71.79
  -6  24  -1  166.18   66.89
  -6  24  -1  -89.59   81.59
   6 -24   1   -2.20   80.89
   6 -24   1   69.19   69.29
  -7  24  -1  -29.70   87.49
  -7  24  -1  183.98   66.09
   7 -24   1  -14.50   66.69
   7 -24   1  -40.40   81.19
  -8  24  -1  169.48   94.49
   8 -24   1   49.40   68.19
   8 -24   1 -166.38   79.89
  -9  24  -1  110.69   96.29
   9 -24   1 -188.18   81.59
   9 -24   1   79.89   65.99
 -10  24  -1  171.78  104.69
  10 -24   1  134.09   74.29
  10 -24   1   70.39   87.79
  11 -24   1 -115.99   91.79
  11 -24   1   22.80   70.29
  12 -24   1    6.30   71.79
  12 -24   1   24.40   98.49
  13 -24   1  -45.00   96.49
  13 -24   1   47.50   72.99
  14 -24   1 -132.29  100.39
  14 -24   1  110.59   86.69
  15 -24   1  -64.09   93.19
  15 -24   1   46.80   81.69
  15 -24   1   59.39  112.09
  16 -24   1    4.40  114.29
  16 -24   1   48.40   82.99
  16 -24   1  178.78   94.39
  17 -24   1  128.99  101.09
  17 -24   1  -63.49  159.98
  17 -24   1  123.19  100.29
  18 -24   1  355.26  157.38
  18 -24   1  126.09  103.39
  18 -24   1  -56.09  136.09
  19 -24   1   92.99  114.79
  19 -24   1 -100.29   92.99
  19 -24   1   12.20  152.18
  19 -24   1   92.69  155.68
   9  23  -1  215.48  144.79
  -9 -23   1  -71.79  106.19
   8  23  -1   26.10  129.09
  -8 -23   1   49.00   98.49
   7  23  -1  111.89  118.79
  -7 -23   1  -67.49   94.49
   6  23  -1  274.87  143.89
  -6 -23   1  -71.59   89.69
   5  23  -1  157.78  110.09
  -5 -23   1  -65.49   77.49
   4  23  -1  518.55  126.19
   3  23  -1  113.79   95.89
   3  23  -1  150.98   75.99
  -3 -23   1  227.08   79.79
   2  23  -1  126.99   62.49
   2  23  -1  -16.10   91.49
  -2 -23   1  160.58  100.79
  -2 -23   1   42.80   69.69
   1  23  -1   83.19  101.49
   1  23  -1   38.80   58.19
  -1 -23   1  215.18   83.49
  -1 -23   1  -64.09   67.59
   0  23  -1  -17.40   85.69
   0  23  -1   13.70   53.69
   0 -23   1   74.49   75.99
   0 -23   1   -2.90   69.79
  -1  23  -1  193.48   55.79
  -1  23  -1  134.59  100.09
   1 -23   1  183.28   78.29
   1 -23   1   -9.10   71.89
  -2  23  -1  268.67   56.69
  -2  23  -1  103.59   93.39
   2 -23   1  180.68   77.99
   2 -23   1   -8.00   70.49
  -3  23  -1  195.28   52.99
  -3  23  -1  262.47   84.69
   3 -23   1  109.89   98.89
   3 -23   1  102.29   77.39
  -4  23  -1  738.13   82.59
  -4  23  -1  514.35  102.19
   4 -23   1  495.25   84.69
  -5  23  -1  226.78   57.09
  -5  23  -1  103.49   82.89
   5 -23   1  116.19   84.19
   5 -23   1   90.49   73.49
  -6  23  -1  184.68   97.89
  -6  23  -1  220.08   57.69
   6 -23   1   90.79   74.09
   6 -23   1  211.58   75.19
  -7  23  -1  222.38   60.39
  -7  23  -1  135.19   82.39
   7 -23   1   38.80   60.29
   7 -23   1  -66.09   71.59
  -8  23  -1   41.40   82.19
   8 -23   1 -116.19   72.29
   8 -23   1    3.00   63.49
  -9  23  -1   10.80   85.79
   9 -23   1  -66.79   78.09
   9 -23   1   55.09   63.59
 -10  23  -1    8.00   87.49
  10 -23   1   58.19   68.19
  11 -23   1  -12.50   66.99
  11 -23   1  -45.10   81.49
  12 -23   1   46.80   86.99
  12 -23   1   45.50   80.19
  13 -23   1   56.79   89.49
  14 -23   1   66.89   95.59
  15 -23   1 -140.89  108.09
  15 -23   1  106.59   79.09
  16 -23   1  -56.39   81.39
  16 -23   1  -52.19  106.99
  16 -23   1   59.99   88.39
  17 -23   1 -217.88  119.79
  17 -23   1 -151.38   81.49
  17 -23   1   12.30   82.29
  18 -23   1    2.80  127.29
  18 -23   1 -173.58  120.09
  18 -23   1  -17.00   88.39
  18 -23   1   89.39   98.59
  19 -23   1   48.90  135.99
  19 -23   1   67.99  138.69
  19 -23   1 -141.09   99.49
  19 -23   1  -92.99   99.39
  20 -23   1    5.20  105.29
  20 -23   1  252.27  154.78
  20 -23   1  211.78  116.89
  20 -23   1   10.50  143.19
  10  22  -1  295.67  162.58
 -10 -22   1  -87.39  101.69
   9  22  -1   32.20  146.19
  -9 -22   1  -65.79   90.39
   8  22  -1  -98.59  131.59
  -8 -22   1  133.19   93.19
   7  22  -1   35.40  108.39
   7  22  -1   13.90   80.99
  -7 -22   1  176.98   93.99
   6  22  -1   87.39   66.69
   6  22  -1  -38.60   98.59
  -6 -22   1 -112.09   82.19
   5  22  -1  445.86  123.49
   5  22  -1  279.97   67.29
  -5 -22   1   77.09   79.29
  -5 -22   1  465.85   95.89
   4  22  -1  592.84  113.29
   4  22  -1  481.75   70.39
  -4 -22   1  793.42  109.19
  -4 -22   1  339.27   83.29
   3  22  -1   58.09   56.29
   3  22  -1  177.08   94.89
  -3 -22   1  262.17   85.09
  -3 -22   1   88.69   68.89
   2  22  -1  154.58   89.79
   2  22  -1  182.38   56.69
  -2 -22   1  150.78   67.49
  -2 -22   1  246.58   80.99
   1  22  -1   -9.80   50.29
   1  22  -1  104.79   91.79
  -1 -22   1   33.40   73.29
   0  22  -1   50.59   49.80
   0  22  -1   83.69   86.59
   0 -22   1  -43.00   62.69
   0 -22   1   24.10   70.09
  -1  22  -1   99.09   80.29
  -1  22  -1   56.89   50.59
   1 -22   1  129.29   72.09
   1 -22   1  -27.40   60.39
  -2  22  -1  181.28   52.19
  -2  22  -1  291.97   92.69
   2 -22   1  201.08   73.69
   2 -22   1    5.80   64.59
  -3  22  -1 1303.37   89.79
   3 -22   1 1200.78  103.29
   3 -22   1 1202.38  115.49
  -4  22  -1  162.78   49.40
  -4  22  -1  210.68  115.89
   4 -22   1  135.19   61.99
   4 -22   1  144.69   69.19
  -5  22  -1 1012.90   85.29
  -5  22  -1  913.91  123.19
   5 -22   1  793.72  101.19
   5 -22   1  655.13   92.39
  -6  22  -1  399.06   84.09
   6 -22   1  222.58   71.79
   6 -22   1  220.18   63.29
  -7  22  -1   77.69   75.69
  -7  22  -1  151.48   52.09
   7 -22   1   99.99   56.99
   7 -22   1  -51.29   66.69
  -8  22  -1   40.60   73.99
  -8  22  -1   83.19   53.29
   8 -22   1  121.79   60.19
   8 -22   1  -87.99   69.59
  -9  22  -1   83.69   76.29
   9 -22   1  -25.40   56.99
   9 -22   1  -70.89   73.29
 -10  22  -1  297.07   86.89
  10 -22   1  213.08   67.39
  10 -22   1  195.98   79.69
  11 -22   1  242.28   83.89
  11 -22   1  356.76   68.09
  12 -22   1   28.90   59.99
  12 -22   1  -93.89   75.09
  13 -22   1  -14.90   63.19
  13 -22   1   18.70   80.89
  14 -22   1  -12.20   86.69
  14 -22   1   62.99   65.69
  15 -22   1  -22.70   94.59
  15 -22   1  -52.19   63.39
  15 -22   1   31.30   72.29
  16 -22   1   45.00   74.69
  16 -22   1  -86.69   99.69
  16 -22   1    5.10   81.19
  17 -22   1   84.19  125.49
  17 -22   1    1.20  106.89
  17 -22   1  -90.19   71.99
  17 -22   1   77.89   83.29
  18 -22   1  124.59   90.19
  18 -22   1  120.79  154.68
  18 -22   1  128.89  128.59
  19 -22   1  123.09  132.29
  19 -22   1  163.58  108.99
  19 -22   1  251.47  128.29
  20 -22   1 -101.79  100.79
  20 -22   1  157.48  138.99
  20 -22   1   90.79  137.09
  20 -22   1  -16.80   97.79
  21 -22   1  164.68  146.99
  21 -22   1   20.40  143.79
  21 -22   1  147.29  107.89
  21 -22   1  117.39  102.89
  12  21  -1   38.40  137.39
 -12 -21   1  -33.30  102.69
  11  21  -1  139.69  131.19
 -11 -21   1  -63.89   98.29
  10  21  -1   71.99   87.69
  10  21  -1  105.59  122.29
 -10 -21   1  -62.49   86.49
   9  21  -1  -41.50  111.39
   9  21  -1   22.50   78.99
  -9 -21   1  113.89  125.09
  -9 -21   1  -35.80   85.29
   8  21  -1  165.68   73.89
   8  21  -1  167.78  110.99
  -8 -21   1  141.79   83.39
  -8 -21   1  219.88   98.09
   7  21  -1   93.09   66.69
   7  21  -1  105.89  105.19
  -7 -21   1  263.87   79.69
  -7 -21   1  279.57   93.89
   6  21  -1  -28.20   61.69
   6  21  -1  -20.30   93.49
  -6 -21   1    0.30   72.29
  -6 -21   1  104.69   84.49
   5  21  -1  263.07   99.19
   5  21  -1  371.56   65.69
  -5 -21   1  519.55   86.89
  -5 -21   1  266.57   80.69
   4  21  -1   66.29   54.69
   4  21  -1  -18.80   82.69
   3  21  -1  319.77   97.89
   3  21  -1  267.97   57.49
  -3 -21   1  299.17   72.09
  -3 -21   1  325.07   76.69
   2  21  -1    0.10   83.49
  -2 -21   1  101.79   58.09
  -2 -21   1   54.59   71.39
   1  21  -1   46.90  111.49
   1  21  -1   60.19   47.50
  -1 -21   1  106.79   57.29
  -1 -21   1  207.78   71.59
   0  21  -1   46.60   71.79
   0  21  -1   34.80   44.70
   0 -21   1   91.29   66.09
   0 -21   1    2.20   53.69
  -1  21  -1   61.89   73.99
  -1  21  -1   22.10   45.70
   1 -21   1   58.39   64.69
   1 -21   1   83.49   56.69
  -2  21  -1  678.03   74.49
  -2  21  -1  689.63  103.79
   2 -21   1  468.75   69.99
   2 -21   1  608.74   84.99
  -3  21  -1  179.08   47.30
  -3  21  -1  182.08   69.49
   3 -21   1  113.99   66.39
   3 -21   1  152.78   55.99
  -4  21  -1  400.16   79.29
  -4  21  -1  633.34   68.79
   4 -21   1  495.35   74.59
   4 -21   1  265.57   61.29
  -5  21  -1  331.87   81.39
  -5  21  -1  495.45   70.29
   5 -21   1  249.28   59.19
   5 -21   1  228.78   70.19
  -6  21  -1  168.68   48.10
  -6  21  -1  193.38   71.79
   6 -21   1   48.30   62.59
   6 -21   1  137.19   57.79
  -7  21  -1  784.12  101.89
  -7  21  -1  922.41   81.59
   7 -21   1  636.34   90.59
   7 -21   1  713.63   93.39
  -8  21  -1   81.59   49.60
  -8  21  -1   -5.60   69.49
   8 -21   1  -10.00   50.79
  -9  21  -1  195.38   77.69
   9 -21   1  -29.60   65.19
   9 -21   1  113.29   55.79
 -10  21  -1  689.53   99.29
  10 -21   1  367.96   69.49
  10 -21   1  476.85   82.29
  11 -21   1   89.29   60.29
  11 -21   1   34.30   69.69
  12 -21   1  144.69   78.59
  12 -21   1  132.79   58.89
  13 -21   1  -18.40   56.79
  13 -21   1  122.79   78.99
  14 -21   1    5.00   83.79
  14 -21   1  -12.70   59.79
  15 -21   1  -64.89   88.29
  15 -21   1    7.80   62.99
  15 -21   1    6.60   66.19
  16 -21   1   29.70   91.29
  16 -21   1   90.79   74.19
  16 -21   1  106.79   72.39
  17 -21   1  177.08   75.59
  17 -21   1  294.07  105.19
  17 -21   1  174.48  106.69
  17 -21   1   68.09   81.49
  18 -21   1  287.97   87.59
  18 -21   1  196.28  116.59
  18 -21   1  193.08   87.99
  18 -21   1  238.18  115.69
  19 -21   1  313.87   91.19
  19 -21   1  347.67  123.49
  19 -21   1  462.95  126.99
  20 -21   1  475.25  110.79
  20 -21   1  573.74  139.59
  20 -21   1  337.97   99.19
  21 -21   1   67.39  113.19
  21 -21   1  211.48  140.09
  21 -21   1  -23.40  168.98
  22 -21   1  208.28  144.99
  22 -21   1 -156.68  118.49
  22 -21   1  153.98  116.29
  13  20  -1 -257.47  107.09
  13  20  -1   83.29  145.59
 -13 -20   1 -153.28  100.59
  12  20  -1  -80.89   84.69
  12  20  -1  -95.49  120.39
 -12 -20   1  -65.79   91.49
  11  20  -1  118.59  136.09
  11  20  -1  -27.90   79.69
 -11 -20   1  -86.29   81.99
 -11 -20   1  209.48  126.59
  10  20  -1 -110.89   70.89
  10  20  -1  150.58  130.99
 -10 -20   1   10.10  112.19
 -10 -20   1   45.90   85.69
   9  20  -1   51.59  113.89
  -9 -20   1  174.98  101.79
  -9 -20   1  -86.79   70.89
   8  20  -1   51.69  110.39
   8  20  -1  -16.60   64.39
  -8 -20   1   88.39   74.49
  -8 -20   1  239.98   93.69
   7  20  -1  -31.20   61.19
   7  20  -1   19.90   93.29
  -7 -20   1  205.08   83.89
  -7 -20   1   28.80  101.69
   6  20  -1   72.19   89.59
   6  20  -1   36.10   58.09
  -6 -20   1   81.89   75.09
  -6 -20   1  -17.10   68.79
   5  20  -1   39.70  114.29
   5  20  -1   59.89   53.49
  -5 -20   1   73.59   77.39
  -5 -20   1   -1.60   60.19
   4  20  -1  115.99   86.69
   4  20  -1  134.69   51.59
  -4 -20   1  235.78   75.99
  -4 -20   1   96.69   64.49
   3  20  -1   24.00   71.19
   3  20  -1   13.50   47.90
  -3 -20   1   22.90   63.99
  -3 -20   1    5.30   56.19
   2  20  -1   34.60   46.80
   2  20  -1  123.19   75.69
  -2 -20   1   37.50   54.39
  -2 -20   1  108.69   65.29
   1  20  -1   -8.10   42.20
   1  20  -1  -31.20   67.59
  -1 -20   1    4.40   61.59
  -1 -20   1  -49.40   49.40
   0  20  -1   31.10   41.50
   0  20  -1  -12.00   64.19
   0 -20   1   18.20   59.49
   0 -20   1    1.60   52.39
  -1  20  -1   81.39   69.99
  -1  20  -1  200.68   43.70
   1 -20   1  148.29   56.49
   1 -20   1   88.99   58.79
   1 -20   1  239.18   63.19
  -2  20  -1  165.98   42.60
  -2  20  -1  153.68   66.79
   2 -20   1   57.79   47.60
   2 -20   1   67.69   56.79
   2 -20   1   -3.60   53.09
  -3  20  -1   79.89   63.39
  -3  20  -1   52.99   39.30
   3 -20   1   37.80   56.59
   3 -20   1   85.39   67.19
   3 -20   1  -37.10   50.79
   3 -20   1   69.49   47.80
  -4  20  -1  -40.60   59.19
  -4  20  -1   19.60   39.10
   4 -20   1  -45.00   64.49
   4 -20   1  -49.50   55.19
   4 -20   1    0.50   47.30
  -5  20  -1   12.50   56.49
  -5  20  -1  129.39   41.00
   5 -20   1   38.80   49.00
   5 -20   1   56.29   66.69
   5 -20   1  -10.40   57.29
  -6  20  -1 1234.88   79.59
  -6  20  -1 1043.40  101.99
   6 -20   1  894.41   92.19
   6 -20   1  932.81   88.59
   6 -20   1  824.22  106.19
  -7  20  -1  378.26   51.69
  -7  20  -1  297.37   70.59
   7 -20   1  274.37   78.79
   7 -20   1  258.27   66.69
   7 -20   1  211.38   56.79
  -8  20  -1  127.49   46.80
  -8  20  -1   79.29   65.29
   8 -20   1   48.80   49.30
   8 -20   1   49.99   61.79
  -9  20  -1  494.75   83.59
   9 -20   1  350.36   71.89
   9 -20   1  363.56   65.59
 -10  20  -1   43.20   65.79
  10 -20   1    7.90   47.40
  10 -20   1   16.80   61.49
  11 -20   1  -19.30   62.19
  11 -20   1  -26.40   47.10
  12 -20   1   54.99   64.39
  12 -20   1   66.49   52.99
  13 -20   1   70.89   72.69
  13 -20   1   69.49   53.89
  14 -20   1 -150.78   70.59
  14 -20   1   35.90   54.79
  15 -20   1  -79.69   77.09
  15 -20   1  -62.09   56.79
  15 -20   1   14.50   61.49
  16 -20   1   49.99   61.09
  16 -20   1   26.90   65.89
  16 -20   1  203.78   92.29
  17 -20   1   80.29   72.79
  17 -20   1  103.09   96.49
  17 -20   1   86.89   96.99
  17 -20   1   98.69   62.49
  18 -20   1  -12.30   71.59
  18 -20   1  325.57  107.29
  18 -20   1  191.68  105.49
  18 -20   1  133.39   80.19
  19 -20   1  532.35   97.69
  19 -20   1  421.46   90.79
  19 -20   1  818.92  156.18
  19 -20   1  717.13  124.69
  20 -20   1  302.57  117.49
  20 -20   1  128.59   92.79
  20 -20   1   65.99   86.19
  21 -20   1  125.99  125.89
  21 -20   1  147.59   93.39
  21 -20   1  301.07  104.19
  22 -20   1  -48.00   97.09
  22 -20   1  -15.20  108.59
  22 -20   1 -258.27  123.69
  23 -20   1  -69.39  119.89
  23 -20   1   32.30  112.79
  14  19  -1   60.69  137.59
 -14 -19   1  174.48  172.58
  13  19  -1 -215.18   90.69
  13  19  -1   87.29  142.69
 -13 -19   1   -4.20   93.69
 -13 -19   1  249.38  145.19
  12  19  -1   -6.10  112.69
  12  19  -1  -91.69   82.59
 -12 -19   1   26.50  127.69
 -12 -19   1 -193.78   78.99
  11  19  -1   74.39  107.09
  11  19  -1 -128.39   68.79
 -11 -19   1  236.58  115.39
 -11 -19   1  -78.89   77.39
  10  19  -1   19.00  100.29
  10  19  -1 -103.39   65.39
 -10 -19   1   77.69   94.69
 -10 -19   1   41.50   74.49
   9  19  -1   47.90   63.39
   9  19  -1   64.29   94.89
  -9 -19   1   52.39   88.59
   8  19  -1  -93.79   56.89
   8  19  -1  -38.60   89.59
  -8 -19   1  -51.39   62.89
  -8 -19   1   72.69   83.59
   7  19  -1  -11.00   54.59
   7  19  -1  114.29  107.59
  -7 -19   1  135.79   73.89
  -7 -19   1  -39.00   61.39
   6  19  -1  -98.19   49.80
   6  19  -1  -55.09   75.89
  -6 -19   1   65.39   67.49
  -6 -19   1 -135.89   56.59
   5  19  -1   35.10   50.59
   5  19  -1   62.79   79.99
  -5 -19   1   36.00   66.79
  -5 -19   1    6.30   56.69
   4  19  -1    5.40   45.70
   4  19  -1   98.19   73.09
  -4 -19   1  -27.40   48.80
  -4 -19   1   58.99   60.69
   3  19  -1  163.18   71.69
   3  19  -1  140.29   47.80
  -3 -19   1   67.19   56.19
  -3 -19   1  226.28   67.99
   2  19  -1   16.60   41.70
   2  19  -1   75.79   63.79
   2  19  -1    6.80   63.99
  -2 -19   1   54.19   57.39
  -2 -19   1   71.39   50.99
  -2 -19   1  -83.99   49.50
   1  19  -1   39.70   39.30
   1  19  -1   40.60   59.49
   1  19  -1  102.69   57.29
  -1 -19   1  100.29   56.69
  -1 -19   1  -28.50   49.20
  -1 -19   1   63.09   49.90
   0  19  -1  142.39   40.00
   0  19  -1  155.88   66.19
   0 -19   1  111.69   49.10
   0 -19   1  158.38   58.99
   0 -19   1   46.30   50.19
  -1  19  -1  113.59   38.00
  -1  19  -1  113.09   64.89
   1 -19   1   44.20   45.70
   1 -19   1   86.49   54.19
   1 -19   1   -5.90   48.60
  -2  19  -1  -15.70   55.99
  -2  19  -1    4.40   36.30
   2 -19   1   25.20   51.69
   2 -19   1  -42.00   45.10
   2 -19   1    0.10   43.60
  -3  19  -1   55.79   37.00
  -3  19  -1  -44.30   50.69
   3 -19   1   -8.10   42.80
   3 -19   1  -65.99   42.20
   3 -19   1   21.10   50.59
  -4  19  -1  -12.70   56.49
  -4  19  -1   39.40   35.90
   4 -19   1  -21.70   57.29
   4 -19   1   62.79   45.60
   4 -19   1  -13.90   51.19
  -5  19  -1   60.79   57.79
  -5  19  -1  135.89   36.90
   5 -19   1   27.70   42.90
   5 -19   1   79.89   48.20
   5 -19   1  106.69   61.09
   5 -19   1   61.09   54.99
  -6  19  -1  176.38   65.49
  -6  19  -1  195.68   41.30
   6 -19   1   30.50   49.30
   6 -19   1  149.69   67.59
   6 -19   1  111.49   55.59
   6 -19   1   32.40   44.10
  -7  19  -1  119.19   41.10
  -7  19  -1  131.29   62.99
   7 -19   1   59.79   61.19
   7 -19   1   46.80   56.09
   7 -19   1   63.09   44.60
   7 -19   1    1.50   51.39
  -8  19  -1  132.89   43.20
  -8  19  -1   20.10   60.69
   8 -19   1   76.79   56.39
   8 -19   1  107.59   71.69
   8 -19   1   80.39   46.80
  -9  19  -1  -23.10   41.60
  -9  19  -1   39.00   59.99
   9 -19   1    8.10   54.49
   9 -19   1   25.70   44.00
 -10  19  -1  127.89   62.89
  10 -19   1   37.30   47.10
  10 -19   1    2.90   57.79
  11 -19   1   50.19   45.50
  11 -19   1   20.50   60.89
  12 -19   1  -43.50   59.39
  12 -19   1    1.70   44.50
  13 -19   1   -3.50   49.80
  13 -19   1  -43.30   62.99
  14 -19   1   40.50   51.49
  14 -19   1   71.69   74.29
  15 -19   1  145.79   81.49
  15 -19   1  -38.10   52.69
  15 -19   1  -66.19   55.39
  16 -19   1  214.88   87.59
  16 -19   1  103.39   84.79
  16 -19   1  -43.40   54.89
  16 -19   1   49.60   62.59
  17 -19   1   14.50   84.99
  17 -19   1  174.58   93.59
  17 -19   1  -43.80   63.99
  17 -19   1   70.99   59.69
  18 -19   1  104.69   66.89
  18 -19   1  211.88   96.79
  18 -19   1  126.99   73.39
  18 -19   1  200.08   97.39
  19 -19   1  -10.70   71.59
  19 -19   1  153.68   81.19
  19 -19   1  226.58  100.69
  20 -19   1  448.66  127.69
  20 -19   1  187.98   83.49
  21 -19   1  -84.49   87.19
  21 -19   1 -115.49  110.29
  21 -19   1   64.59   98.89
  22 -19   1  -93.19   99.09
  22 -19   1  143.59   92.29
  22 -19   1 -265.87  117.79
  23 -19   1   41.50   98.19
  23 -19   1    2.90  121.09
  23 -19   1 -255.77  133.39
  24 -19   1    1.40  117.89
  15  18  -1  330.47  158.38
  14  18  -1  180.88  127.39
  14  18  -1  -72.89   88.59
 -14 -18   1  265.47  129.09
 -14 -18   1  -68.59   86.59
  13  18  -1 -196.58   79.39
  13  18  -1  174.98  117.09
 -13 -18   1   42.50  136.19
 -13 -18   1 -111.49   79.69
  12  18  -1  -50.29  114.79
  12  18  -1 -113.09   71.99
 -12 -18   1  -11.70   77.09
 -12 -18   1  169.98  106.19
  11  18  -1  166.28  103.19
  11  18  -1  -73.99   68.69
 -11 -18   1 -158.48   90.99
 -11 -18   1   82.99  105.19
  10  18  -1   95.69  122.99
 -10 -18   1  -45.90   63.09
 -10 -18   1  155.38   86.09
   9  18  -1  -22.70   56.19
   9  18  -1  123.29   90.99
  -9 -18   1   22.80   62.09
  -9 -18   1  158.78   76.79
   8  18  -1   39.70   87.89
   8  18  -1  -65.39   51.99
  -8 -18   1   27.80   56.99
  -8 -18   1  105.49   69.69
   7  18  -1   18.70   51.09
   7  18  -1   60.29   77.59
  -7 -18   1  157.98   72.59
  -7 -18   1   17.90   59.49
   6  18  -1  -34.70   45.10
   6  18  -1  -47.00   72.39
  -6 -18   1  -54.89   54.49
  -6 -18   1   90.39   62.99
   5  18  -1   72.89   71.09
   5  18  -1   70.19   45.50
  -5 -18   1  102.59   56.79
  -5 -18   1  191.78   62.69
   4  18  -1   97.79   44.20
   4  18  -1   91.69   63.79
   4  18  -1  118.89   67.99
  -4 -18   1   31.40   49.10
  -4 -18   1  228.88   64.09
   3  18  -1   91.49   64.99
   3  18  -1   45.10   42.70
   3  18  -1   30.80   56.99
  -3 -18   1   71.49   55.89
  -3 -18   1  115.59   49.30
  -3 -18   1   47.60   48.10
   2  18  -1  -55.49   37.20
   2  18  -1  -75.79   52.49
   2  18  -1   81.99   58.99
  -2 -18   1  -24.90   48.60
  -2 -18   1  -42.20   47.00
  -2 -18   1   -2.90   45.20
   1  18  -1  134.69   39.10
   1  18  -1  121.69   55.29
   1  18  -1   66.29   61.59
  -1 -18   1   50.29   46.40
  -1 -18   1    4.50   43.20
  -1 -18   1  180.98   54.99
   0  18  -1    2.80   52.89
   0  18  -1    4.60   35.20
   0 -18   1   19.10   49.50
   0 -18   1   64.39   45.70
   0 -18   1  -19.90   43.30
  -1  18  -1   37.90   34.70
  -1  18  -1   37.60   54.59
   1 -18   1   46.20   43.40
   1 -18   1   24.60   48.20
   1 -18   1   23.20   41.50
  -2  18  -1   62.49   53.29
  -2  18  -1  139.29   35.50
   2 -18   1  132.49   44.80
   2 -18   1   78.09   50.19
   2 -18   1   -0.20   39.90
  -3  18  -1   68.39   32.40
  -3  18  -1  -11.70   48.40
   3 -18   1  -58.89   39.70
   3 -18   1   -5.60   47.70
   3 -18   1    4.60   38.70
  -4  18  -1   25.30   33.50
  -4  18  -1    5.40   48.40
   4 -18   1   65.59   40.80
   4 -18   1   12.20   49.60
   4 -18   1   68.89   51.09
  -5  18  -1  -54.69   46.70
  -5  18  -1   -9.10   31.10
   5 -18   1  -12.70   37.50
   5 -18   1  -25.10   46.50
   5 -18   1  -97.79   52.69
   5 -18   1  -11.00   42.90
  -6  18  -1   36.40   48.90
  -6  18  -1   60.39   35.70
   6 -18   1  -27.00   45.40
   6 -18   1  -20.80   38.60
   6 -18   1    5.20   48.70
   6 -18   1   20.80   57.79
  -7  18  -1   29.20   35.80
  -7  18  -1  -25.50   50.79
   7 -18   1  -23.30   37.00
   7 -18   1  -16.60   48.50
   7 -18   1  -13.80   59.49
   7 -18   1   -7.50   47.70
  -8  18  -1  -58.89   51.99
  -8  18  -1  -28.50   36.30
   8 -18   1   76.89   38.80
   8 -18   1  -35.70   48.60
   8 -18   1  -86.69   48.60
   8 -18   1   35.60   61.49
  -9  18  -1  110.39   60.69
  -9  18  -1  131.49   41.90
   9 -18   1   14.90   49.70
   9 -18   1   88.99   41.60
   9 -18   1   20.70   63.09
 -10  18  -1  -49.99   52.69
  10 -18   1    0.50   38.90
  10 -18   1  -29.30   50.29
  11 -18   1  -27.90   38.90
  11 -18   1  -20.90   55.09
  12 -18   1   37.50   61.79
  12 -18   1   40.00   40.80
  13 -18   1   29.30   59.79
  13 -18   1   20.50   45.00
  14 -18   1  126.19   69.79
  14 -18   1   36.80   46.70
  15 -18   1  -96.49   48.80
  15 -18   1   73.99   71.59
  16 -18   1   99.99   62.19
  16 -18   1   58.29   76.59
  17 -18   1  289.67   92.39
  17 -18   1  207.48   65.99
  18 -18   1  -19.30   62.29
  18 -18   1  112.19   88.59
  19 -18   1  -25.70   91.89
  19 -18   1   71.29   71.39
  20 -18   1   15.10   77.59
  20 -18   1  -37.80   96.29
  21 -18   1   -2.50   82.49
  21 -18   1 -132.89  103.39
  22 -18   1   -5.60   95.39
  22 -18   1 -221.38  114.09
  23 -18   1   27.40  110.49
  24 -18   1   -7.90  119.89
  16  17  -1 -110.59  100.49
  16  17  -1   59.09  141.69
 -16 -17   1 -221.18   97.39
 -16 -17   1  275.47  158.18
  15  17  -1  463.35  132.29
 -15 -17   1   90.69   92.29
 -15 -17   1  308.27  154.78
  14  17  -1 -126.19   78.39
  14  17  -1    4.20  119.59
 -14 -17   1  291.07  124.49
 -14 -17   1 -189.58   80.59
  13  17  -1 -156.08   69.79
  13  17  -1   90.89  104.19
 -13 -17   1   94.29  110.79
 -13 -17   1  -44.20   79.89
  12  17  -1   -7.30  131.59
  12  17  -1  -40.90   67.09
 -12 -17   1    5.10  104.19
 -12 -17   1   35.40   68.19
  11  17  -1    0.40   93.79
  11  17  -1  -10.70   60.89
 -11 -17   1   55.09   85.39
 -11 -17   1 -112.89   60.59
  10  17  -1   18.20   86.09
 -10 -17   1  117.09   79.69
 -10 -17   1  -32.60   60.39
   9  17  -1   27.10   79.39
   9  17  -1  -55.79   48.90
  -9 -17   1   43.10   56.19
  -9 -17   1   88.39   75.59
   8  17  -1  -79.29   46.90
   8  17  -1   83.29   75.59
  -8 -17   1  118.89   58.19
  -8 -17   1   67.19   63.39
   7  17  -1  137.09   73.39
   7  17  -1  169.38   48.70
  -7 -17   1  126.59   66.09
  -7 -17   1   84.89   51.79
   6  17  -1  110.89   70.29
   6  17  -1   66.49   44.20
   6  17  -1   29.20   61.29
  -6 -17   1  110.19   61.39
  -6 -17   1  117.89   53.89
   5  17  -1   21.60   59.49
   5  17  -1  -59.99   38.40
   5  17  -1  -31.60   62.29
  -5 -17   1   19.40   54.99
  -5 -17   1   -3.30   45.70
   4  17  -1   97.49   41.10
   4  17  -1   78.19   57.79
   4  17  -1   70.49   59.99
  -4 -17   1  118.09   53.79
  -4 -17   1   65.09   48.70
  -4 -17   1   49.00   46.70
   3  17  -1  142.29   57.69
   3  17  -1  103.19   39.30
   3  17  -1  147.39   62.19
  -3 -17   1  163.58   53.59
  -3 -17   1   61.49   44.50
  -3 -17   1   85.39   45.00
   2  17  -1   17.60   53.99
   2  17  -1   26.80   36.00
   2  17  -1  -20.80   48.70
  -2 -17   1    6.40   41.50
  -2 -17   1  -13.60   47.30
  -2 -17   1   15.50   41.40
   1  17  -1  123.49   50.69
   1  17  -1  223.58   39.20
   1  17  -1  225.68   64.09
  -1 -17   1  178.88   53.89
  -1 -17   1  196.68   48.80
  -1 -17   1   80.99   43.40
   0  17  -1   69.59   54.69
   0  17  -1   71.39   35.50
   0  17  -1   93.09   48.70
   0 -17   1  117.49   42.50
   0 -17   1  182.78   52.49
   0 -17   1   97.49   41.60
  -1  17  -1  378.06   68.39
  -1  17  -1  444.46   57.09
   1 -17   1  205.28   42.90
   1 -17   1  249.28   50.09
   1 -17   1  366.96   55.89
  -2  17  -1   10.40   33.10
  -2  17  -1   42.30   48.60
   2 -17   1  -27.50   34.50
   2 -17   1   -4.70   36.30
   2 -17   1    5.00   45.00
  -3  17  -1   86.39   34.10
  -3  17  -1  140.09   55.79
   3 -17   1  111.29   48.60
   3 -17   1  124.69   42.50
   3 -17   1   49.10   35.00
  -4  17  -1  157.18   35.70
  -4  17  -1  212.28   56.89
   4 -17   1  122.69   48.30
   4 -17   1   71.09   38.50
   4 -17   1  218.38   52.89
   4 -17   1  119.29   42.40
  -5  17  -1   -2.90   48.40
  -5  17  -1  101.99   34.50
   5 -17   1   59.89   47.30
   5 -17   1  -18.50   35.20
   5 -17   1    2.50   39.20
   5 -17   1   34.50   48.40
  -6  17  -1    2.70   45.70
  -6  17  -1  -52.59   31.00
   6 -17   1  -75.79   39.90
   6 -17   1  -14.70   45.00
   6 -17   1   -6.30   38.50
   6 -17   1   23.90   51.89
  -7  17  -1  -80.79   44.10
  -7  17  -1    1.50   33.90
   7 -17   1  -23.30   35.20
   7 -17   1   84.99   54.39
   7 -17   1  -36.10   42.50
   7 -17   1   31.00   46.00
  -8  17  -1  247.28   42.80
  -8  17  -1  214.88   58.29
   8 -17   1  172.98   52.29
   8 -17   1  206.48   45.40
   8 -17   1  246.98   59.59
   8 -17   1  156.88   49.40
  -9  17  -1   -3.30   37.40
  -9  17  -1  -51.19   46.90
   9 -17   1   70.89   49.10
   9 -17   1   73.79   49.90
   9 -17   1  -69.79   36.30
   9 -17   1    1.80   58.29
 -10  17  -1   52.49   52.79
  10 -17   1   77.49   52.49
  10 -17   1    1.10   39.60
  11 -17   1  112.99   43.70
  11 -17   1  129.49   55.99
  12 -17   1   15.80   40.00
  12 -17   1  -20.10   52.99
  13 -17   1   85.79   59.29
  14 -17   1  -62.89   59.19
  15 -17   1  -12.20   48.00
  16 -17   1  -14.30   55.59
  16 -17   1   21.00   73.29
  17 -17   1  184.98   77.59
  17 -17   1   79.79   58.19
  18 -17   1  202.08   66.09
  18 -17   1  437.26   91.79
  19 -17   1    6.40   67.39
  19 -17   1  155.68   90.29
  20 -17   1  -68.79   90.29
  20 -17   1  -71.29   68.49
  21 -17   1   29.40  102.29
  21 -17   1   11.10   83.39
  22 -17   1 -127.79  104.89
  22 -17   1  -50.09   83.49
  23 -17   1   34.90   93.19
  24 -17   1  -14.90  106.49
  25 -17   1  -13.40  125.89
  17  16  -1   32.40  143.79
  17  16  -1 -125.99   96.59
 -17 -16   1  349.96  153.08
  16  16  -1  262.97   93.69
  16  16  -1  497.45  134.99
 -16 -16   1  154.38   91.89
  15  16  -1  367.36  133.09
  15  16  -1  -37.00   82.89
 -15 -16   1  112.09   84.69
 -15 -16   1  432.96  129.29
 -14 -16   1  423.96  142.79
  13  16  -1   96.89  102.49
  13  16  -1 -149.49   63.99
 -13 -16   1 -166.58   63.89
 -13 -16   1  242.58  103.59
  12  16  -1  -37.70   85.39
 -12 -16   1    3.00   62.89
 -12 -16   1  171.78   90.79
  11  16  -1   90.49   81.79
  11  16  -1  -54.49   56.49
 -11 -16   1  -33.50   59.39
 -11 -16   1  109.19   82.39
  10  16  -1    2.20   75.59
 -10 -16   1    6.30   55.89
 -10 -16   1   37.60   75.59
   9  16  -1  -86.79   47.50
   9  16  -1   22.10   71.59
  -9 -16   1  -10.00   49.00
  -9 -16   1   -7.50   66.79
   8  16  -1  135.49   71.89
   8  16  -1   83.49   48.00
  -8 -16   1  171.38   66.19
  -8 -16   1  192.98   57.39
   7  16  -1  -20.40   40.20
   7  16  -1  -98.39   62.69
   7  16  -1  -36.00   61.29
  -7 -16   1   19.70   53.39
  -7 -16   1    0.50   46.10
   6  16  -1   61.89   39.70
   6  16  -1   28.00   61.09
   6  16  -1 -112.79   57.09
  -6 -16   1   23.70   53.99
  -6 -16   1  -58.79   40.10
   5  16  -1   -6.50   53.69
   5  16  -1  -23.00   54.89
   5  16  -1  -45.40   37.50
  -5 -16   1   -0.30   48.30
  -5 -16   1    7.80   42.70
  -5 -16   1  -82.09   42.40
   4  16  -1  225.88   42.30
   4  16  -1  330.77   58.69
   4  16  -1  280.17   64.49
  -4 -16   1  254.47   50.09
  -4 -16   1  289.97   56.59
  -4 -16   1  180.78   45.70
   3  16  -1  179.18   52.39
   3  16  -1  147.29   38.00
   3  16  -1  188.98   59.09
  -3 -16   1   66.29   39.60
  -3 -16   1  155.38   45.80
  -3 -16   1  210.48   50.89
   2  16  -1  270.87   40.50
   2  16  -1  237.18   53.59
   2  16  -1  235.18   59.09
  -2 -16   1  180.08   45.40
  -2 -16   1  216.08   52.29
  -2 -16   1  110.39   38.70
   1  16  -1   94.59   35.00
   1  16  -1  112.39   52.69
   1  16  -1  140.19   47.20
  -1 -16   1  114.49   47.90
  -1 -16   1  108.09   42.60
  -1 -16   1   27.70   36.80
   0  16  -1  -63.49   45.00
   0  16  -1   12.20   42.70
   0  16  -1   -2.20   30.90
   0 -16   1  -41.70   33.40
   0 -16   1   21.80   44.50
   0 -16   1    0.70   35.70
  -1  16  -1    1.90   46.20
  -1  16  -1   27.60   31.20
   1 -16   1   67.49   46.60
   1 -16   1  -12.40   33.20
   1 -16   1   -8.40   37.00
  -2  16  -1  216.68   55.09
  -2  16  -1  161.18   34.20
   2 -16   1   89.79   35.30
   2 -16   1  241.78   50.29
   2 -16   1   89.59   38.10
  -3  16  -1  128.79   50.39
  -3  16  -1  103.59   33.60
   3 -16   1  220.28   47.60
   3 -16   1   96.29   35.40
   3 -16   1  179.78   41.30
  -4  16  -1    6.20   32.30
  -4  16  -1   27.30   43.80
   4 -16   1   81.49   43.90
   4 -16   1  -10.90   33.60
   4 -16   1   82.99   42.70
   4 -16   1   21.50   35.60
  -5  16  -1  -27.40   42.30
  -5  16  -1  -29.20   29.60
   5 -16   1   21.90   34.10
   5 -16   1  -20.70   43.80
   5 -16   1    3.00   40.50
   5 -16   1  -88.69   34.50
  -6  16  -1  -44.00   29.50
  -6  16  -1   33.20   42.70
   6 -16   1   30.00   34.00
   6 -16   1    3.20   40.40
   6 -16   1  -32.80   42.70
   6 -16   1  -55.39   36.50
  -7  16  -1   46.90   46.30
  -7  16  -1  116.49   35.60
   7 -16   1   77.79   44.00
   7 -16   1   75.39   37.50
   7 -16   1  123.69   50.89
   7 -16   1  129.69   41.50
  -8  16  -1   48.50   33.40
  -8  16  -1   80.69   49.90
   8 -16   1   89.49   45.20
   8 -16   1   48.10   37.90
   8 -16   1   96.49   52.99
   8 -16   1   21.20   41.80
  -9  16  -1    5.90   34.90
  -9  16  -1  -12.90   46.80
   9 -16   1   24.70   43.90
   9 -16   1    3.20   51.29
   9 -16   1  -51.09   32.80
   9 -16   1  -33.20   44.40
 -10  16  -1  109.79   51.89
  10 -16   1   66.89   50.79
  10 -16   1   59.99   37.90
  10 -16   1  163.58   59.49
  11 -16   1   17.50   50.69
  11 -16   1   26.50   35.70
  12 -16   1   95.59   56.59
  15 -16   1  381.16   60.79
  15 -16   1  600.04   89.29
  16 -16   1  -11.30   65.29
  16 -16   1   46.20   50.39
  17 -16   1  -17.00   54.59
  17 -16   1   89.29   66.79
  18 -16   1  -50.59   63.19
  18 -16   1  122.09   72.99
  19 -16   1   61.89   82.29
  19 -16   1    8.30   66.29
  20 -16   1  -44.70   87.59
  20 -16   1  -81.39   69.49
  21 -16   1    4.20   94.19
  22 -16   1  116.49  103.59
  22 -16   1  295.07  105.09
  23 -16   1    3.70   94.09
  23 -16   1  -77.79  109.39
  24 -16   1  -12.50   94.49
  25 -16   1   71.99  105.79
  18  15  -1  -80.59  102.39
  18  15  -1  214.18  150.68
 -18 -15   1  242.08  143.19
 -18 -15   1 -224.58   94.89
  17  15  -1  361.06  128.09
  17  15  -1  126.09   94.99
 -17 -15   1  155.98   95.09
 -17 -15   1  505.55  151.58
  16  15  -1  514.05  155.48
 -16 -15   1  472.25  133.29
 -16 -15   1  145.19   98.79
  15  15  -1  406.66  132.59
  15  15  -1  243.28   78.49
 -15 -15   1  543.75  129.39
 -15 -15   1   30.90   80.69
  14  15  -1  227.98   77.09
  14  15  -1  308.37  100.89
 -14 -15   1  182.88   71.49
 -14 -15   1  361.86  109.89
  13  15  -1   80.29   95.69
  13  15  -1  -45.50   60.79
 -13 -15   1 -146.89   59.69
 -13 -15   1   81.79   97.39
  12  15  -1   26.00   89.09
 -12 -15   1  -20.30   56.39
 -12 -15   1   92.39   80.79
  11  15  -1  231.08   82.89
  11  15  -1   27.30   53.69
 -11 -15   1  121.49   74.49
 -11 -15   1  117.29   59.49
  10  15  -1   27.40   69.79
  10  15  -1  -46.50   44.90
 -10 -15   1   47.20   65.09
 -10 -15   1  -28.90   49.20
   9  15  -1  557.64   91.49
   9  15  -1  522.95   73.89
  -9 -15   1  428.16   61.79
  -9 -15   1  765.22   85.49
   8  15  -1  -12.30   61.49
   8  15  -1  -12.20   41.40
  -8 -15   1   55.79   47.80
  -8 -15   1   93.79   58.09
   7  15  -1  579.14   86.29
   7  15  -1  623.64   67.09
  -7 -15   1  629.44   76.49
  -7 -15   1  601.64   76.99
   6  15  -1   21.90   53.89
   6  15  -1   50.99   37.30
   6  15  -1   11.80   55.39
  -6 -15   1   25.00   47.80
  -6 -15   1   17.60   51.79
  -6 -15   1   37.40   43.00
   5  15  -1  171.18   57.29
   5  15  -1  235.28   64.39
   5  15  -1  259.77   42.70
  -5 -15   1  291.77   47.70
  -5 -15   1  179.28   44.00
  -5 -15   1  319.17   55.69
   4  15  -1  532.65   72.19
   4  15  -1  622.14   77.79
   4  15  -1  631.74   62.79
  -4 -15   1  730.63   70.09
  -4 -15   1  705.93   69.99
  -4 -15   1  531.95   67.99
   3  15  -1  185.38   37.30
   3  15  -1  187.58   54.59
   3  15  -1  161.68   46.90
  -3 -15   1  143.59   42.20
  -3 -15   1  115.99   37.60
  -3 -15   1  165.38   48.80
   2  15  -1  885.81   73.59
   2  15  -1 1190.18   68.59
   2  15  -1  968.40   84.09
  -2 -15   1  958.70   68.09
  -2 -15   1 1025.20   73.19
  -2 -15   1 1073.89   75.99
   1  15  -1 1802.82   79.69
   1  15  -1 1651.13   84.19
   1  15  -1 1675.23   98.89
  -1 -15   1 1687.63   77.89
  -1 -15   1 1740.23   91.39
   0  15  -1  133.89   49.30
   0  15  -1  173.78   45.60
   0  15  -1  202.88   46.30
   0 -15   1  156.88   41.00
   0 -15   1  181.48   35.60
   0 -15   1  241.48   54.89
  -1  15  -1  -13.50   39.60
   1 -15   1  -50.39   28.20
   1 -15   1   32.90   39.30
   1 -15   1  -17.20   31.60
  -2  15  -1  -10.40   45.10
  -2  15  -1  -34.00   37.60
   2 -15   1   67.29   31.70
   2 -15   1   25.80   39.70
  -3  15  -1  -26.00   36.70
   3 -15   1   25.30   58.39
   3 -15   1   36.00   31.80
   3 -15   1  -49.40   28.50
  -4  15  -1   53.69   42.30
  -4  15  -1  -21.30   37.50
   4 -15   1  -28.90   30.60
   4 -15   1   58.69   47.20
   4 -15   1   33.80   38.20
   4 -15   1   22.50   31.70
  -5  15  -1  -44.60   37.60
  -5  15  -1  -35.50   29.00
   5 -15   1   40.80   30.70
   5 -15   1  -31.70   32.60
   5 -15   1   49.50   40.20
   5 -15   1  -62.69   35.00
  -6  15  -1  195.38   48.90
  -6  15  -1  210.68   35.00
   6 -15   1  171.28   34.90
   6 -15   1  287.67   48.10
   6 -15   1  231.38   46.20
   6 -15   1  170.68   36.50
  -7  15  -1   35.40   31.50
  -7  15  -1   41.70   41.70
   7 -15   1  103.59   40.40
   7 -15   1  110.99   38.00
   7 -15   1   83.69   34.10
   7 -15   1   63.09   43.00
  -8  15  -1    4.90   30.40
  -8  15  -1   49.20   42.30
   8 -15   1   66.49   41.80
   8 -15   1   30.30   43.70
   8 -15   1  -28.70   31.20
   8 -15   1   93.69   38.90
  -9  15  -1   99.69   34.80
  -9  15  -1  210.88   52.49
   9 -15   1    6.60   40.50
   9 -15   1  100.59   36.20
   9 -15   1  186.18   52.79
   9 -15   1  114.59   45.30
  10 -15   1   -4.50   43.60
  10 -15   1  -36.50   49.70
  10 -15   1    9.50   42.70
  11 -15   1  330.97   59.79
  15 -15   1  101.09   44.00
  15 -15   1   24.80   59.69
  16 -15   1   -7.70   46.90
  16 -15   1    4.00   63.29
  17 -15   1  -50.39   50.79
  17 -15   1  -27.50   63.19
  18 -15   1   18.60   69.39
  18 -15   1    7.10   53.89
  19 -15   1   98.89   59.29
  19 -15   1   62.89   79.29
  20 -15   1  -21.40   83.39
  20 -15   1   86.59   65.69
  21 -15   1 -150.08   81.49
  22 -15   1  -31.90   78.89
  23 -15   1 -199.88  100.29
  23 -15   1  -94.29   79.99
  24 -15   1   80.49  103.19
  25 -15   1  165.58  119.39
  26 -15   1  117.59  106.69
  19  14  -1  191.78  152.58
  19  14  -1 -142.69   95.39
 -19 -14   1 -215.98  100.09
 -19 -14   1  288.97  155.78
  18  14  -1  150.98  147.49
  18  14  -1 -150.48   90.09
 -18 -14   1  207.18  140.69
 -18 -14   1  -86.39   92.29
  17  14  -1 -169.48   79.69
  16  14  -1  179.08  107.59
  16  14  -1   69.79   76.99
 -16 -14   1  115.59  116.99
 -16 -14   1  -38.60   75.89
  15  14  -1  530.95  116.99
  15  14  -1  197.28   76.09
 -15 -14   1  429.76  116.49
 -15 -14   1  163.48   76.49
  14  14  -1  -66.59   59.99
  14  14  -1  156.58   98.79
 -14 -14   1 -130.99   59.59
 -14 -14   1   -7.40   93.59
  13  14  -1    5.00   57.39
  13  14  -1   17.60   75.79
 -13 -14   1  -17.50   58.69
 -13 -14   1  131.19   88.39
  12  14  -1   82.89   54.19
  12  14  -1   91.59   77.29
 -12 -14   1   41.70   52.69
 -12 -14   1   96.29   71.59
  11  14  -1  -12.20   47.30
  11  14  -1    7.00   70.69
 -11 -14   1   24.50   50.19
 -11 -14   1  102.49   70.29
  10  14  -1  368.86   55.29
  10  14  -1  471.15   84.09
 -10 -14   1  447.86   73.89
 -10 -14   1  252.17   54.89
   9  14  -1  104.89   60.09
   9  14  -1    7.70   41.80
  -9 -14   1   13.10   42.90
  -9 -14   1   90.39   55.79
   8  14  -1  298.57   68.09
   8  14  -1  172.48   60.39
   8  14  -1  300.27   48.20
  -8 -14   1  261.37   51.69
  -8 -14   1  383.06   65.09
   7  14  -1  254.97   44.20
   7  14  -1  299.27   66.39
   7  14  -1  352.96   60.89
  -7 -14   1  435.96   62.79
  -7 -14   1  400.36   54.29
   6  14  -1  122.49   37.70
   6  14  -1  -26.20   50.99
   6  14  -1  131.79   54.69
  -6 -14   1  128.59   42.70
  -6 -14   1  165.68   50.89
  -6 -14   1  103.49   41.80
   5  14  -1   -9.30   46.80
   5  14  -1  -29.60   47.60
   5  14  -1    3.90   31.90
  -5 -14   1   24.90   34.30
  -5 -14   1  -14.80   41.50
  -5 -14   1   31.90   36.20
   4  14  -1   27.90   47.20
   4  14  -1   69.79   32.80
   4  14  -1   43.50   46.00
  -4 -14   1   40.40   42.90
  -4 -14   1   42.20   35.30
  -4 -14   1   25.40   34.50
   3  14  -1 1163.88   66.69
   3  14  -1 1173.28   83.89
   3  14  -1  996.20   74.09
  -3 -14   1 1093.69   76.29
  -3 -14   1 1148.99   74.69
  -3 -14   1 1177.58   67.79
   2  14  -1 1339.87   78.29
   2  14  -1 1427.06   89.29
   2  14  -1 1610.74   75.99
  -2 -14   1 1470.15   70.49
  -2 -14   1 1447.46  110.29
  -2 -14   1 1505.85   82.89
   1  14  -1  961.20   97.19
   1  14  -1  815.72   63.89
   1  14  -1  932.31   75.89
  -1 -14   1  928.61   63.69
  -1 -14   1  727.93   57.39
  -1 -14   1  882.81   68.09
   0  14  -1 2215.58   86.89
   0  14  -1 2364.86   86.99
   0  14  -1 2194.38  103.49
   0 -14   1 2147.59   96.69
   0 -14   1 2426.66   88.79
   0 -14   1 2223.68   82.79
  -1  14  -1   -7.00   28.00
  -1  14  -1  -32.00   33.30
  -1  14  -1   15.30   37.20
   1 -14   1   26.20   34.20
   1 -14   1  -23.70   27.20
  -2  14  -1  -36.00   27.80
  -2  14  -1  -12.20   34.50
   2 -14   1   60.09   35.60
   2 -14   1  -15.50   26.60
   2 -14   1  -48.60   26.80
  -3  14  -1   48.70   37.40
  -3  14  -1   63.09   29.30
   3 -14   1   70.89   37.40
   3 -14   1   84.79   30.30
   3 -14   1   81.39   31.90
  -4  14  -1    3.80   34.70
  -4  14  -1   24.80   27.90
   4 -14   1  -32.40   34.60
   4 -14   1  -47.30   27.60
   4 -14   1   12.20   28.00
   4 -14   1  -27.90   32.20
  -5  14  -1  161.58   43.20
   5 -14   1  135.89   33.90
   5 -14   1  208.08   42.00
   5 -14   1  175.58   35.30
   5 -14   1   34.70   62.49
  -6  14  -1  319.87   48.80
  -6  14  -1  274.47   35.30
   6 -14   1  263.47   38.10
   6 -14   1  221.98   39.70
   6 -14   1  306.17   47.20
   6 -14   1  345.57   54.49
  -7  14  -1 1351.56   67.89
  -7  14  -1 1199.28   77.49
   7 -14   1 1162.18   74.19
   7 -14   1 1156.08   72.49
   7 -14   1 1187.78   71.29
   7 -14   1 1234.68   71.69
  -8  14  -1 1531.05   85.79
  -8  14  -1 1447.66   73.19
   8 -14   1 1419.86   77.39
   8 -14   1 1374.06   77.49
   8 -14   1 1450.95   80.79
   8 -14   1 1474.65   78.99
  -9  14  -1   28.10   30.60
  -9  14  -1   64.29   41.60
   9 -14   1   44.30   40.50
   9 -14   1   18.20   42.10
   9 -14   1   86.09   37.40
  10 -14   1  405.06   46.30
  10 -14   1  507.65   69.29
  11 -14   1  643.24   77.29
  14 -14   1   24.20   50.69
  15 -14   1  -39.50   38.80
  15 -14   1  -16.20   53.49
  16 -14   1   44.80   58.19
  16 -14   1   -7.30   45.00
  17 -14   1  -31.30   50.09
  17 -14   1   59.79   61.69
  18 -14   1  -42.10   51.99
  18 -14   1   95.79   67.99
  19 -14   1   17.50   57.69
  19 -14   1   -1.10   71.39
  20 -14   1   94.09   70.79
  20 -14   1  -70.19   73.39
  21 -14   1 -127.89   79.79
  21 -14   1  103.69   78.89
  22 -14   1 -108.09   86.99
  22 -14   1  -22.40   79.29
  23 -14   1   11.50   88.59
  23 -14   1 -126.99   92.09
  24 -14   1  -88.49   81.59
  25 -14   1  108.79  100.49
  26 -14   1  -18.40  114.79
  20  13  -1  -30.30  109.19
  20  13  -1  180.78  147.49
 -20 -13   1  240.58  151.68
 -20 -13   1 -142.69  106.89
  19  13  -1  -46.90   91.69
 -19 -13   1   62.89  152.38
  18  13  -1  113.19  117.69
  18  13  -1 -209.38   80.39
 -18 -13   1  -70.69   89.09
 -18 -13   1  149.09  137.09
  17  13  -1   68.79  108.79
 -17 -13   1 -169.38   75.39
 -17 -13   1   62.89  119.09
  16  13  -1  -45.60   65.09
  16  13  -1  119.19  101.09
 -16 -13   1  -82.19   67.79
 -16 -13   1   52.09  106.39
  15  13  -1  -42.80   63.29
  15  13  -1   70.59   87.89
 -15 -13   1   42.20   95.19
  14  13  -1    5.90   81.29
  14  13  -1   46.30   56.49
 -14 -13   1  -28.70   82.09
 -14 -13   1  -36.70   56.29
  13  13  -1   40.50   72.89
  13  13  -1   83.69   55.49
 -13 -13   1   90.49   76.79
 -13 -13   1   55.99   55.19
  12  13  -1  -84.59   45.10
  12  13  -1   39.80   69.69
 -12 -13   1   53.69   67.29
 -12 -13   1   62.79   52.29
  11  13  -1  255.67   77.09
  11  13  -1   96.99   48.40
 -11 -13   1  192.98   52.69
 -11 -13   1  225.18   69.99
  10  13  -1   35.60   57.99
  10  13  -1  -43.40   39.40
 -10 -13   1  -24.10   42.10
 -10 -13   1    0.00   52.49
   9  13  -1   85.29   53.69
   9  13  -1   25.40   40.40
  -9 -13   1    4.30   43.00
  -9 -13   1  113.79   53.49
   8  13  -1   66.29   38.50
   8  13  -1    5.60   51.79
   8  13  -1   11.40   54.59
  -8 -13   1    3.60   38.20
  -8 -13   1   82.39   51.89
   7  13  -1  -16.70   34.20
   7  13  -1  -13.50   50.09
   7  13  -1   53.19   49.50
  -7 -13   1   14.30   44.80
  -7 -13   1   24.90   37.10
  -7 -13   1  -52.99   38.30
   6  13  -1  715.23   76.09
   6  13  -1  673.43   61.59
   6  13  -1  577.54   73.69
  -6 -13   1  708.13   68.09
  -6 -13   1  478.65   64.49
  -6 -13   1  699.83   68.29
   5  13  -1  -51.09   43.50
   5  13  -1   64.49   31.90
   5  13  -1   -6.20   40.90
  -5 -13   1  -14.60   40.70
  -5 -13   1    7.50   31.00
  -5 -13   1   28.50   30.10
   4  13  -1  106.19   44.30
   4  13  -1  118.29   32.30
   4  13  -1   15.90   43.40
  -4 -13   1  134.59   36.20
  -4 -13   1   65.29   31.10
  -4 -13   1  113.69   44.20
   3  13  -1  947.71   68.09
   3  13  -1 1077.29   76.49
   3  13  -1 1020.90   61.09
  -3 -13   1  876.31   78.79
  -3 -13   1  999.80   68.79
  -3 -13   1 1026.90   61.89
   2  13  -1  614.74   63.79
   2  13  -1  561.64   55.99
   2  13  -1  512.75   56.89
  -2 -13   1  616.34   56.49
  -2 -13   1  633.54   58.99
  -2 -13   1  618.54   53.89
   1  13  -1 1323.57   65.59
   1  13  -1 1250.27   64.59
   1  13  -1 1340.47   79.89
  -1 -13   1 1309.27   64.59
  -1 -13   1 1299.97   62.19
  -1 -13   1 1312.07   72.09
   0  13  -1   27.90   35.10
   0  13  -1   30.90   25.80
   0  13  -1   -8.10   32.10
   0 -13   1   31.60   27.70
   0 -13   1   -4.60   23.50
   0 -13   1   53.89   29.50
  -1  13  -1  574.44   59.39
  -1  13  -1  659.33   51.99
  -1  13  -1  646.24   48.40
   1 -13   1  653.03   50.69
   1 -13   1  606.84   48.00
   1 -13   1  651.73   57.19
   1 -13   1  709.23   77.69
  -2  13  -1   25.00   23.90
  -2  13  -1  -34.10   28.70
   2 -13   1   -3.30   26.70
   2 -13   1   40.40   37.90
   2 -13   1    1.20   23.50
   2 -13   1   28.20   30.90
  -3  13  -1  100.69   36.70
  -3  13  -1  102.59   26.00
   3 -13   1   66.79   34.30
   3 -13   1   61.39   38.30
   3 -13   1   25.00   26.70
   3 -13   1   78.49   28.60
  -4  13  -1   82.29   25.60
  -4  13  -1   91.39   35.60
   4 -13   1   92.19   30.10
   4 -13   1   84.49   36.60
   4 -13   1   28.30   32.60
   4 -13   1   22.20   27.50
   4 -13   1   45.20   27.60
  -5  13  -1  -36.70   31.20
  -5  13  -1   -1.60   24.50
   5 -13   1   22.40   31.60
   5 -13   1  -19.30   36.20
   5 -13   1  -21.40   25.60
   5 -13   1  -13.00   27.80
   5 -13   1   -4.80   32.30
  -6  13  -1  550.84   59.29
   6 -13   1  575.84   63.69
   6 -13   1  403.06   51.69
   6 -13   1  581.04   55.69
   6 -13   1  480.55   57.79
   6 -13   1  610.74   57.09
  -7  13  -1 3121.99  117.19
  -7  13  -1 3305.97  104.99
   7 -13   1 3082.09  120.49
   7 -13   1 2997.50  110.79
   7 -13   1 3259.87  108.39
   7 -13   1 3188.68  109.09
   7 -13   1 3265.97  111.29
  -8  13  -1   50.99   28.00
  -8  13  -1   40.10   35.40
   8 -13   1   55.49   37.00
   8 -13   1   70.69   41.80
   8 -13   1  -33.50   37.10
   8 -13   1   86.09   32.90
  -9  13  -1  222.28   46.30
   9 -13   1  121.09   35.40
   9 -13   1   89.79   42.40
   9 -13   1  206.38   46.30
  10 -13   1  594.24   66.99
  10 -13   1  622.94   69.49
  10 -13   1  644.84   65.59
  11 -13   1  218.38   50.49
  11 -13   1  170.38   50.19
  11 -13   1  162.28   50.29
  12 -13   1  234.28   55.99
  13 -13   1   17.90   59.99
  14 -13   1  190.98   42.20
  14 -13   1  287.57   55.99
  15 -13   1  159.48   46.40
  15 -13   1  241.38   60.19
  16 -13   1   11.90   41.60
  16 -13   1   64.49   55.19
 -17  13  -1   -6.30   59.49
  17 -13   1   41.60   58.89
  17 -13   1  -16.20   47.70
 -18  13  -1   39.90   60.69
  18 -13   1   -6.60   51.69
  18 -13   1  -18.50   61.29
 -19  13  -1   34.80   70.89
  19 -13   1  -99.69   64.89
  19 -13   1   71.39   61.69
 -20  13  -1  229.18   89.59
  20 -13   1  262.37   75.49
  20 -13   1   57.59   76.19
 -21  13  -1  250.17  128.89
  21 -13   1  174.48   78.39
  21 -13   1  129.79   82.59
 -22  13  -1  304.67  104.79
  22 -13   1  139.39   82.79
  22 -13   1  100.29   86.29
 -23  13  -1   63.49  109.09
  23 -13   1  120.59   78.49
 -24  13  -1    5.50  120.79
  24 -13   1  -29.10   83.09
 -25  13  -1   61.79  121.29
  25 -13   1   15.50  103.79
 -26  13  -1   73.59  141.69
  26 -13   1 -156.38  115.79
  20  12  -1  386.56  162.78
  20  12  -1 -143.09   92.59
 -20 -12   1  -19.50  151.78
 -20 -12   1  -44.90  107.99
  19  12  -1  -36.60  113.99
  19  12  -1  -28.90   93.09
 -19 -12   1   37.30  124.19
  18  12  -1 -107.79   74.89
  18  12  -1   11.00  101.39
 -18 -12   1   -9.90  122.69
  17  12  -1  -51.49   69.59
  17  12  -1  -27.20   92.09
 -17 -12   1  -36.60   98.79
  16  12  -1  -33.60   65.29
  16  12  -1  114.39   92.39
 -16 -12   1  111.39   93.79
 -16 -12   1 -159.08   59.49
  15  12  -1   38.70   79.99
  15  12  -1  -38.20   58.39
 -15 -12   1  -41.10   79.09
 -15 -12   1 -114.59   56.09
  14  12  -1  -23.90   72.39
  14  12  -1  -98.59   51.79
 -14 -12   1  -37.80   51.29
 -14 -12   1  120.49   76.39
  13  12  -1   11.70   49.70
  13  12  -1   58.19   70.49
 -13 -12   1  -15.20   48.50
 -13 -12   1   41.10   70.89
  12  12  -1  120.59   66.39
  12  12  -1   62.79   45.60
 -12 -12   1  117.99   49.10
 -12 -12   1  145.79   67.69
  11  12  -1   34.00   43.20
  11  12  -1  -16.40   53.59
 -11 -12   1  -18.50   51.09
 -11 -12   1   48.10   41.60
  10  12  -1   24.90   53.49
  10  12  -1  -29.70   39.00
 -10 -12   1    5.60   52.99
 -10 -12   1   -7.90   41.60
   9  12  -1  433.36   50.19
   9  12  -1  457.85   63.69
   9  12  -1  472.45   75.29
  -9 -12   1  477.25   69.59
  -9 -12   1  467.35   65.69
   8  12  -1  158.98   56.19
   8  12  -1  207.78   58.49
   8  12  -1  210.58   42.30
  -8 -12   1  157.18   41.60
  -8 -12   1  190.48   52.49
   7  12  -1  -75.39   46.60
   7  12  -1   18.50   44.60
   7  12  -1   51.69   32.60
  -7 -12   1   14.80   39.00
  -7 -12   1   15.70   35.20
  -7 -12   1   44.60   34.90
   6  12  -1  -58.09   37.70
   6  12  -1  -76.09   42.20
   6  12  -1  -13.00   28.60
  -6 -12   1    3.60   30.80
  -6 -12   1   -8.40   38.10
  -6 -12   1   15.60   32.30
   5  12  -1   12.20   39.10
   5  12  -1    4.60   28.50
   5  12  -1  -25.80   40.90
  -5 -12   1   -7.30   28.20
  -5 -12   1  -24.30   26.80
  -5 -12   1  -49.30   36.40
   4  12  -1 1308.27   80.09
   4  12  -1 1392.76   67.79
   4  12  -1 1198.48   71.39
  -4 -12   1 1412.96   73.99
  -4 -12   1 1455.55   66.29
  -4 -12   1 1264.37  108.59
   3  12  -1  337.47   52.19
   3  12  -1  314.77   49.30
   3  12  -1  368.16   49.40
  -3 -12   1  326.47   63.29
  -3 -12   1  383.86   49.60
  -3 -12   1  309.07   35.10
  -3 -12   1  251.97   37.70
   2  12  -1  313.57   47.60
   2  12  -1  271.97   38.30
   2  12  -1  278.87   33.80
  -2 -12   1  258.27   48.20
  -2 -12   1  350.66   48.20
  -2 -12   1  345.57   45.40
  -2 -12   1  244.08   32.30
   1  12  -1   -7.30   30.20
   1  12  -1   15.50   29.10
   1  12  -1   12.20   23.80
  -1 -12   1   32.40   36.00
  -1 -12   1   -5.40   24.60
  -1 -12   1   11.70   21.90
  -1 -12   1   22.60   27.90
   0  12  -1   85.19   36.40
   0  12  -1   48.70   30.80
   0  12  -1   78.59   23.90
   0 -12   1   60.99   25.70
   0 -12   1   45.00   21.40
   0 -12   1   75.39   29.30
   0 -12   1  141.39   40.30
  -1  12  -1   -3.80   20.30
  -1  12  -1  -37.90   28.70
  -1  12  -1   10.70   26.80
   1 -12   1   -4.50   18.70
   1 -12   1  -31.60   21.70
   1 -12   1    2.10   26.20
   1 -12   1   16.30   32.80
  -2  12  -1  120.19   24.40
  -2  12  -1  126.19   36.40
   2 -12   1  186.48   32.50
   2 -12   1  126.99   29.70
   2 -12   1  140.09   38.90
   2 -12   1  101.49   21.90
  -3  12  -1  -43.50   27.60
  -3  12  -1   -1.80   21.00
   3 -12   1   -0.20   27.70
   3 -12   1   15.00   27.10
   3 -12   1    8.90   32.70
   3 -12   1   -5.20   20.30
   3 -12   1   -9.90   24.00
  -4  12  -1   19.80   29.50
  -4  12  -1   23.90   21.50
   4 -12   1   -2.30   26.60
   4 -12   1   11.00   24.10
   4 -12   1    4.70   20.90
   4 -12   1   -4.90   22.90
   4 -12   1   20.10   26.50
   4 -12   1   19.30   34.50
  -5  12  -1  -42.20   27.60
  -5  12  -1  -26.70   22.00
   5 -12   1  -38.70   21.80
   5 -12   1  -21.70   23.10
   5 -12   1   21.30   27.70
   5 -12   1  -26.00   26.70
   5 -12   1    2.30   35.50
   5 -12   1    4.20   23.30
  -6  12  -1  551.44   48.30
  -6  12  -1  481.45   51.69
   6 -12   1  578.74   48.10
   6 -12   1  482.85   50.09
   6 -12   1  504.05   62.09
   6 -12   1  419.86   52.29
   6 -12   1  468.95   50.79
   6 -12   1  495.35   49.20
  -7  12  -1  109.29   36.20
  -7  12  -1  100.29   35.20
   7 -12   1  165.88   37.70
   7 -12   1  176.68   36.30
   7 -12   1  121.49   31.70
   7 -12   1  169.48   42.40
   7 -12   1  129.59   31.70
  -8  12  -1    2.40   26.00
  -8  12  -1   -3.10   31.90
   8 -12   1  -16.10   38.40
   8 -12   1  -25.80   29.80
   8 -12   1   15.50   28.70
   8 -12   1  -51.89   33.50
   9 -12   1  473.35   55.79
   9 -12   1  579.24   59.09
   9 -12   1  464.35   56.19
   9 -12   1  567.74   63.39
  10 -12   1  323.77   48.70
  10 -12   1  236.58   38.40
  10 -12   1  432.06   55.79
  10 -12   1  370.46   58.59
  11 -12   1   42.30   35.00
  11 -12   1   71.79   42.40
  11 -12   1   39.40   35.60
  11 -12   1   15.80   42.20
  12 -12   1   52.39   46.70
  12 -12   1  105.29   40.60
  13 -12   1  470.95   66.09
  13 -12   1  367.16   57.69
 -14  12  -1  786.42   79.69
  14 -12   1  638.64   84.29
  14 -12   1  669.83   68.59
  14 -12   1  718.73   76.19
 -15  12  -1  -37.40   48.10
  15 -12   1   36.80   39.10
  15 -12   1   75.69   60.59
  15 -12   1  -74.79   43.50
 -16  12  -1   37.60   54.69
  16 -12   1   76.19   66.99
  16 -12   1   39.50   52.39
  16 -12   1  -18.20   39.90
 -17  12  -1    6.80   59.29
 -17  12  -1   56.89   41.50
  17 -12   1  -35.00   56.39
  17 -12   1  -45.20   40.70
 -18  12  -1  126.29   44.40
 -18  12  -1  -51.79   61.49
  18 -12   1    5.20   59.29
  18 -12   1    2.90   49.10
 -19  12  -1   26.90   68.59
 -19  12  -1  105.99   47.40
  19 -12   1  -86.39   61.99
  19 -12   1   29.00   56.09
 -20  12  -1  260.57   82.19
 -20  12  -1  247.18   54.49
  20 -12   1   80.09   73.29
  20 -12   1  163.48   68.49
 -21  12  -1  657.33   86.49
  21 -12   1  459.15   86.99
  21 -12   1  456.55   84.99
 -22  12  -1  172.38   94.19
  22 -12   1   66.69   71.89
  22 -12   1 -111.79   77.19
 -23  12  -1  107.99  102.49
  23 -12   1    2.20   73.39
 -24  12  -1  126.19  122.49
  24 -12   1  -44.90   88.59
 -25  12  -1  251.97  132.39
  25 -12   1  -22.70  104.39
 -26  12  -1    7.10  142.49
  26 -12   1    2.10   99.19
  21  11  -1 -125.59  100.99
 -21 -11   1   57.69  158.78
  20  11  -1  -19.50   84.59
  20  11  -1  127.19  142.29
 -20 -11   1   89.29  136.99
 -20 -11   1  -18.80   90.79
  19  11  -1   71.79  107.59
 -19 -11   1 -202.68   81.59
 -19 -11   1   -1.60  114.99
  18  11  -1  109.29   98.89
 -18 -11   1 -108.99  117.39
  17  11  -1  -71.89   65.29
  17  11  -1   93.79   92.49
 -17 -11   1  -80.99   90.99
 -17 -11   1  -99.49   60.99
  16  11  -1 -106.39   55.69
  16  11  -1   27.30   83.09
 -16 -11   1  -65.49   57.49
 -16 -11   1    0.70   83.99
  15  11  -1   11.10   53.19
  15  11  -1   52.99   71.39
 -15 -11   1   19.40   76.79
 -15 -11   1  -48.00   53.19
  14  11  -1  132.49   69.39
  14  11  -1  120.89   54.79
 -14 -11   1   94.69   74.49
 -14 -11   1   42.60   49.70
  13  11  -1    8.30   46.90
  13  11  -1  141.39   64.19
 -13 -11   1   80.49   46.20
 -13 -11   1  138.79   67.29
  12  11  -1   20.80   56.09
  12  11  -1  -31.60   39.20
 -12 -11   1   79.59   59.59
 -12 -11   1    4.70   43.30
  11  11  -1  -47.10   37.00
  11  11  -1    4.30   49.10
 -11 -11   1  -26.30   39.50
 -11 -11   1   43.00   51.69
  10  11  -1  446.86   50.69
  10  11  -1  401.76   64.19
 -10 -11   1  555.74   68.49
 -10 -11   1  438.76   65.99
   9  11  -1    1.50   50.29
   9  11  -1    1.40   45.70
   9  11  -1   30.60   35.60
  -9 -11   1   33.60   35.30
  -9 -11   1   -1.30   45.60
   8  11  -1  357.46   57.89
   8  11  -1  392.96   54.49
   8  11  -1  398.76   57.09
  -8 -11   1  435.56   58.99
  -8 -11   1  386.46   59.49
   7  11  -1   99.39   32.10
   7  11  -1  123.89   44.90
   7  11  -1  106.09   46.70
  -7 -11   1  151.88   42.60
  -7 -11   1   46.60   32.60
  -7 -11   1   96.99   33.20
   6  11  -1   39.00   38.50
   6  11  -1   64.99   28.90
   6  11  -1  -47.10   40.70
  -6 -11   1   51.59   28.50
  -6 -11   1  -35.30   36.90
  -6 -11   1   32.40   28.90
  -6 -11   1   62.59   64.59
   5  11  -1 1498.95   67.19
   5  11  -1 1434.76   79.59
   5  11  -1 1355.26   75.69
  -5 -11   1 1349.66   79.29
  -5 -11   1 1359.96   65.79
  -5 -11   1 1234.68   84.29
  -5 -11   1 1397.36   70.79
   4  11  -1  213.18   44.30
   4  11  -1  192.48   36.80
   4  11  -1  241.08   40.00
  -4 -11   1  145.09   29.30
  -4 -11   1  242.18   40.60
  -4 -11   1  224.88   34.30
  -4 -11   1  252.17   46.30
   3  11  -1  307.77   40.80
   3  11  -1  232.78   41.10
   3  11  -1  168.98   45.80
   3  11  -1  243.38   31.20
  -3 -11   1  290.27   42.40
  -3 -11   1  243.28   28.70
  -3 -11   1  252.17   43.00
  -3 -11   1  228.48   33.40
   2  11  -1   91.69   25.20
   2  11  -1  119.49   31.80
   2  11  -1   86.89   34.30
  -2 -11   1  119.99   28.30
  -2 -11   1  144.09   31.00
  -2 -11   1  119.09   22.90
  -2 -11   1  167.88   41.50
   1  11  -1  -33.70   28.30
   1  11  -1  -11.30   21.90
   1  11  -1    1.30   26.80
  -1 -11   1   25.50   23.90
  -1 -11   1  -32.70   31.70
  -1 -11   1   -3.60   17.40
  -1 -11   1   -1.90   25.50
   0  11  -1  209.58   41.00
   0  11  -1  178.78   27.10
   0  11  -1  246.88   33.20
   0 -11   1  163.58   31.10
   0 -11   1  222.68   40.30
   0 -11   1  273.47   40.00
   0 -11   1  191.18   24.10
  -1  11  -1   83.29   23.20
  -1  11  -1   97.19   28.10
  -1  11  -1   37.20   30.00
   1 -11   1   91.19   34.90
   1 -11   1  104.99   21.50
   1 -11   1   61.49   26.30
   1 -11   1  132.39   29.70
  -2  11  -1  287.97   40.70
  -2  11  -1  287.07   37.60
   2 -11   1  297.77   41.10
   2 -11   1  308.07   37.10
   2 -11   1  289.17   43.20
   2 -11   1  346.77   45.10
  -3  11  -1  651.83   54.69
  -3  11  -1  633.44   44.70
   3 -11   1  716.83   46.90
   3 -11   1  711.13   55.19
   3 -11   1  687.83   59.89
   3 -11   1  668.63   51.49
   3 -11   1  664.33   45.20
  -4  11  -1   60.09   29.30
  -4  11  -1   30.00   22.30
   4 -11   1   78.19   25.30
   4 -11   1    3.60   24.70
   4 -11   1   62.39   21.40
   4 -11   1   65.79   28.10
   4 -11   1   20.80   31.60
   4 -11   1   23.20   25.60
  -5  11  -1    2.20   20.60
  -5  11  -1    7.00   29.20
   5 -11   1   57.39   25.80
   5 -11   1    9.40   28.40
   5 -11   1    3.90   31.70
   5 -11   1    5.10   21.80
   5 -11   1   89.99   28.10
   5 -11   1   14.40   25.70
  -6  11  -1   26.70   29.70
  -6  11  -1    3.70   23.60
   6 -11   1   56.69   26.40
   6 -11   1   53.39   32.50
   6 -11   1   52.39   25.00
   6 -11   1   60.99   27.80
   6 -11   1   20.10   29.50
  -7  11  -1   81.49   32.90
  -7  11  -1  138.69   34.40
   7 -11   1   87.59   35.20
   7 -11   1   98.99   27.10
   7 -11   1  100.39   31.20
   7 -11   1  123.59   29.20
  -8  11  -1  222.28   40.20
  -8  11  -1  181.38   31.60
   8 -11   1  196.58   32.30
   8 -11   1  232.18   38.10
   8 -11   1  191.78   34.40
   8 -11   1  177.58   39.20
   9 -11   1  562.64   54.19
   9 -11   1  570.54   58.59
   9 -11   1  608.24   60.09
   9 -11   1  692.83   55.39
  10 -11   1 1487.45   78.49
  10 -11   1 1445.16   77.39
  10 -11   1 1411.16   76.09
  10 -11   1 1482.75   71.89
  11 -11   1  103.79   36.10
  11 -11   1   78.99   34.50
  11 -11   1   83.79   40.50
  11 -11   1  107.79   42.70
 -12  11  -1  223.58   48.40
  12 -11   1  271.77   47.40
  12 -11   1  218.78   51.99
  12 -11   1  225.08   46.50
  12 -11   1  207.88   39.20
 -13  11  -1  409.66   58.59
 -13  11  -1  413.06   51.19
  13 -11   1  310.47   44.20
  13 -11   1  401.26   56.19
  13 -11   1  319.27   45.40
  13 -11   1  406.66   60.79
 -14  11  -1   33.70   33.30
 -14  11  -1   66.39   47.20
  14 -11   1   73.99   51.69
  14 -11   1   50.29   36.70
  14 -11   1   44.10   43.60
  14 -11   1   52.69   45.20
 -15  11  -1  -41.60   48.20
 -15  11  -1   -6.50   33.70
  15 -11   1  -34.80   37.30
  15 -11   1   -4.20   56.19
  15 -11   1   24.70   52.09
  15 -11   1   27.40   49.40
 -16  11  -1   27.30   36.80
 -16  11  -1  -28.30   50.89
  16 -11   1  -19.50   52.69
  16 -11   1  -78.89   37.10
  16 -11   1  -36.40   61.79
 -17  11  -1   54.59   39.30
 -17  11  -1  -14.30   58.49
  17 -11   1   36.90   55.29
  17 -11   1   83.79   44.50
  17 -11   1  108.49   71.39
 -18  11  -1  -15.00   40.60
 -18  11  -1  -29.60   60.19
  18 -11   1  -62.89   56.49
  18 -11   1   40.40   54.19
  18 -11   1   86.59   78.29
 -19  11  -1  -36.90   68.09
 -19  11  -1  -31.70   44.10
  19 -11   1 -120.59   61.79
  19 -11   1  155.88  109.39
  19 -11   1   -2.00   58.59
 -20  11  -1  415.96   91.89
 -20  11  -1  388.36   60.29
  20 -11   1  285.47   75.69
  20 -11   1  347.67   74.89
 -21  11  -1  195.68   55.89
 -21  11  -1  342.97  102.09
  21 -11   1   29.80   69.59
  21 -11   1  178.68   66.59
 -22  11  -1  -31.00   83.49
 -22  11  -1  148.49   63.59
  22 -11   1   75.39   78.69
  22 -11   1  -10.00   74.49
 -23  11  -1   96.59   65.59
 -23  11  -1   38.20  100.29
  23 -11   1   -6.50   79.39
  23 -11   1  -61.29   72.79
 -24  11  -1   94.39  109.19
 -24  11  -1  290.27   85.99
  24 -11   1  -31.00   84.49
 -25  11  -1  112.79  129.89
  25 -11   1   73.19   91.09
 -26  11  -1   49.99  134.19
  26 -11   1   -4.10   96.99
 -27  11  -1  197.58  175.18
  27 -11   1  191.28  131.39
  22  10  -1  -70.99  101.09
 -22 -10   1  -15.20  151.78
  21  10  -1  152.48  120.59
  21  10  -1  -41.00   87.99
 -21 -10   1 -148.19   90.99
 -21 -10   1   37.70  139.79
  20  10  -1  349.17  139.09
 -20 -10   1 -150.78   81.49
 -20 -10   1  -48.30  124.59
  19  10  -1  176.18  105.29
  19  10  -1  -16.70   71.19
 -19 -10   1   89.29  111.59
 -19 -10   1 -111.59   72.19
  18  10  -1   52.79   65.39
  18  10  -1  -21.30   88.49
 -18 -10   1   72.89   98.69
 -18 -10   1  -62.29   65.89
  17  10  -1  -32.70   77.69
  17  10  -1  -15.00   57.09
 -17 -10   1   93.69   91.19
 -17 -10   1  -40.10   61.99
  16  10  -1   95.29   74.69
  16  10  -1   29.00   52.99
 -16 -10   1   70.79   84.69
 -16 -10   1 -105.59   52.29
  15  10  -1   81.29   63.59
  15  10  -1   36.10   49.20
 -15 -10   1  119.39   80.19
 -15 -10   1   14.60   50.39
  14  10  -1  162.08   52.59
  14  10  -1  197.68   66.99
 -14 -10   1  199.38   74.29
 -14 -10   1  116.89   52.19
  13  10  -1   17.20   43.10
  13  10  -1   20.40   53.89
 -13 -10   1   -5.20   44.70
 -13 -10   1    3.50   58.59
  12  10  -1   25.90   41.10
  12  10  -1   -9.90   50.39
 -12 -10   1   41.80   42.40
 -12 -10   1  176.58   57.89
  11  10  -1  336.87   63.59
  11  10  -1  236.58   44.90
 -11 -10   1  312.47   49.00
 -11 -10   1  312.07   61.49
  10  10  -1   70.79   33.90
  10  10  -1   23.30   51.09
  10  10  -1  -18.50   44.40
 -10 -10   1   23.40   36.90
 -10 -10   1   61.29   49.00
   9  10  -1  635.84   65.49
   9  10  -1  628.34   61.79
   9  10  -1  657.83   76.59
  -9 -10   1  681.23   64.79
  -9 -10   1  739.63   69.09
   8  10  -1  389.56   53.49
   8  10  -1  395.36   58.29
   8  10  -1  405.66   56.79
  -8 -10   1  403.76   58.29
  -8 -10   1  323.37   42.80
  -8 -10   1  276.07   38.80
  -8 -10   1  453.75   66.49
   7  10  -1  -43.70   39.70
   7  10  -1  -54.09   32.40
   7  10  -1   39.70   28.10
  -7 -10   1   20.40   37.20
  -7 -10   1   18.50   38.30
  -7 -10   1    4.60   28.50
  -7 -10   1  -32.50   27.30
   6  10  -1 1046.00   59.19
   6  10  -1  939.81   68.99
   6  10  -1 1069.59   69.59
  -6 -10   1  881.81   57.69
  -6 -10   1 1132.09   71.49
  -6 -10   1 1025.20   64.59
  -6 -10   1  976.50   62.69
   5  10  -1  -15.60   29.50
   5  10  -1  -23.80   33.50
   5  10  -1   -5.20   32.20
  -5 -10   1   -2.60   32.90
  -5 -10   1   -1.50   31.10
  -5 -10   1  -25.70   23.50
  -5 -10   1   -2.30   23.60
   4  10  -1  119.59   30.30
   4  10  -1  106.79   27.70
   4  10  -1  103.49   35.10
   4  10  -1   74.19   34.20
  -4 -10   1  144.49   38.80
  -4 -10   1  112.29   27.90
  -4 -10   1   85.89   24.30
  -4 -10   1  144.99   34.80
   3  10  -1  -31.80   25.90
   3  10  -1    6.10   28.40
   3  10  -1   -8.80   21.00
   3  10  -1    6.50   26.20
  -3 -10   1   17.90   24.10
  -3 -10   1   -7.40   19.40
  -3 -10   1   18.60   26.50
  -3 -10   1  -54.69   31.00
   2  10  -1   43.80   28.00
   2  10  -1   77.59   29.20
   2  10  -1   83.99   23.80
   2  10  -1   70.39   31.70
  -2 -10   1   96.59   27.10
  -2 -10   1   76.99   34.60
  -2 -10   1   67.09   19.80
  -2 -10   1   84.09   28.50
   1  10  -1  595.54   54.89
   1  10  -1  619.74   43.60
   1  10  -1  627.54   43.50
  -1 -10   1  572.14   56.49
  -1 -10   1  656.73   50.69
  -1 -10   1  614.84   40.10
  -1 -10   1  619.54   44.60
   0  10  -1    7.00   24.20
   0  10  -1  -24.80   28.80
   0  10  -1    8.60   21.00
   0 -10   1    0.50   30.70
   0 -10   1   -2.80   18.30
   0 -10   1   34.00   26.00
   0 -10   1  -14.60   23.10
  -1  10  -1   24.10   30.40
  -1  10  -1   72.09   25.90
  -1  10  -1   51.49   22.30
   1 -10   1   99.89   29.20
   1 -10   1   17.20   32.80
   1 -10   1   46.40   26.50
   1 -10   1   66.69   20.80
  -2  10  -1   69.89   33.40
  -2  10  -1  136.19   24.40
   2 -10   1  126.49   34.80
   2 -10   1  124.29   30.30
   2 -10   1  108.69   22.20
   2 -10   1  163.68   30.50
  -3  10  -1  -21.00   20.20
   3 -10   1  -13.80   35.40
   3 -10   1   -9.50   19.30
   3 -10   1   -6.50   24.30
   3 -10   1  -16.40   31.70
  -4  10  -1   34.30   31.50
  -4  10  -1   19.40   22.20
   4 -10   1   -2.00   22.40
   4 -10   1   36.90   23.80
   4 -10   1   34.90   24.90
   4 -10   1   48.30   27.20
   4 -10   1   -0.20   31.50
  -5  10  -1   43.10   32.70
  -5  10  -1   35.40   22.40
   5 -10   1   54.99   33.10
   5 -10   1   57.19   28.20
   5 -10   1   53.39   24.10
   5 -10   1   25.70   24.70
   5 -10   1   37.50   26.50
  -6  10  -1 1814.72   70.39
  -6  10  -1 1857.11   78.89
   6 -10   1 1858.01   72.69
   6 -10   1 1904.41   71.99
   6 -10   1 1849.11   74.49
   6 -10   1 1868.81   79.89
  -7  10  -1  301.47   47.40
  -7  10  -1  288.17   33.60
   7 -10   1  260.47   32.50
   7 -10   1  277.97   38.20
   7 -10   1  278.07   33.70
   7 -10   1  290.37   40.00
  -8  10  -1  426.66   48.80
   8 -10   1  434.76   51.79
   8 -10   1  495.15   50.09
   8 -10   1  514.25   50.79
   8 -10   1  489.55   51.39
   9 -10   1  970.40   64.29
   9 -10   1 1088.99   65.39
   9 -10   1 1086.19   59.79
   9 -10   1 1019.30   64.39
 -10  10  -1  130.69   37.60
  10 -10   1  114.99   40.70
  10 -10   1   85.49   34.00
  10 -10   1  146.49   38.70
  10 -10   1  107.49   31.10
 -11  10  -1 1164.98   62.09
 -11  10  -1 1032.40   69.39
  11 -10   1 1156.78   70.99
  11 -10   1 1110.89   64.89
  11 -10   1 1060.49   75.39
  11 -10   1 1125.19   71.99
 -12  10  -1  203.88   46.00
 -12  10  -1  189.48   32.80
  12 -10   1  227.28   43.60
  12 -10   1  276.47   51.29
  12 -10   1  239.88   45.80
  12 -10   1  221.68   37.40
 -13  10  -1  104.79   46.60
 -13  10  -1  150.38   34.10
  13 -10   1   78.69   39.20
  13 -10   1   69.79   34.00
  13 -10   1   33.00   38.40
  13 -10   1  105.79   44.20
 -14  10  -1   -0.80   29.40
 -14  10  -1   -6.30   44.60
  14 -10   1   -9.80   41.40
  14 -10   1    5.50   40.70
  14 -10   1   22.70   34.20
  14 -10   1  -16.70   46.30
 -15  10  -1  -36.40   47.10
  15 -10   1  -53.09   46.20
  15 -10   1  -19.60   45.30
  15 -10   1   44.80   53.79
  15 -10   1   -9.90   36.00
 -16  10  -1  -55.99   49.60
 -16  10  -1  -27.80   32.40
  16 -10   1    2.40   57.69
  16 -10   1   40.50   41.00
  16 -10   1   -7.30   49.30
  16 -10   1   29.20   51.49
 -17  10  -1   -0.60   37.60
 -17  10  -1   -5.40   54.69
  17 -10   1  102.29   65.39
  17 -10   1    8.20   52.59
  17 -10   1   38.50   64.69
  17 -10   1   58.89   44.70
 -18  10  -1   55.69   64.39
 -18  10  -1  119.49   42.10
  18 -10   1   94.69   59.69
  18 -10   1   46.70   71.49
  18 -10   1  169.98   55.19
 -19  10  -1  239.88   76.69
 -19  10  -1  335.07   53.79
  19 -10   1  319.47   70.19
  19 -10   1  254.97   84.69
  19 -10   1  271.67   63.99
 -20  10  -1   93.09   75.89
 -20  10  -1   54.49   49.20
  20 -10   1  -54.19   62.89
  20 -10   1   96.59   60.69
 -21  10  -1  131.59   54.59
 -21  10  -1  137.19   87.79
  21 -10   1  122.99   61.69
 -22  10  -1   80.89   89.89
 -22  10  -1   80.39   57.69
  22 -10   1   -3.10   93.19
  22 -10   1  -37.00   71.99
 -23  10  -1   70.59   60.09
 -23  10  -1   -1.20  104.09
  23 -10   1   23.80   73.89
  23 -10   1    2.00   77.59
 -24  10  -1  239.48  107.79
  24 -10   1  203.18   88.19
 -25  10  -1  -66.19  116.09
  25 -10   1  134.29   84.79
 -26  10  -1  -65.09  132.89
  26 -10   1  -30.40   89.99
 -27  10  -1   87.39  142.59
  27 -10   1  134.09  124.59
  22   9  -1    8.10   94.99
 -22  -9   1   45.30  143.49
 -22  -9   1 -212.58   91.29
  21   9  -1   57.99  126.89
  21   9  -1  -57.89   83.59
 -21  -9   1  -51.39   87.99
 -21  -9   1   76.19  136.29
  20   9  -1   40.90  111.59
  20   9  -1  -20.40   72.09
 -20  -9   1   30.40  114.59
 -20  -9   1 -144.39   76.09
  19   9  -1  -14.80   69.39
  19   9  -1  109.69   94.19
 -19  -9   1  -11.70   68.29
  18   9  -1   68.99   82.79
  18   9  -1   17.80   61.19
 -18  -9   1  -44.70   98.59
 -18  -9   1  -61.19   60.79
  17   9  -1   74.79   73.59
  17   9  -1   23.60   56.29
 -17  -9   1   15.80   88.69
  16   9  -1   34.20   65.59
  16   9  -1   44.20   53.19
 -16  -9   1  -62.89   49.10
 -16  -9   1   -2.40   77.39
  15   9  -1  169.28   66.39
  15   9  -1  198.18   53.29
 -15  -9   1  111.99   52.09
 -15  -9   1  209.38   80.29
  14   9  -1 -103.69   53.19
  14   9  -1   10.40   42.00
 -14  -9   1  105.99   69.79
 -14  -9   1   -5.80   45.50
  13   9  -1  -73.89   49.60
  13   9  -1  -13.20   39.10
 -13  -9   1  -49.00   53.69
 -13  -9   1   38.50   40.90
  12   9  -1  701.43   77.29
  12   9  -1  825.42   71.59
 -12  -9   1  745.83   70.29
 -12  -9   1  727.93   81.49
  11   9  -1  207.68   42.50
  11   9  -1  219.08   53.59
 -11  -9   1  175.18   43.90
 -11  -9   1  167.18   52.39
  10   9  -1  894.51   67.79
  10   9  -1  729.43   69.69
  10   9  -1  819.32   79.99
 -10  -9   1  882.51   66.79
 -10  -9   1  761.82   71.49
 -10  -9   1  965.90   79.09
   9   9  -1  311.27   49.70
   9   9  -1  360.86   53.99
   9   9  -1  445.36   52.99
  -9  -9   1  448.26   53.69
  -9  -9   1  468.65   59.69
  -9  -9   1  483.95   66.29
  -9  -9   1  434.56   59.19
   8   9  -1  131.19   32.30
   8   9  -1  114.49   39.50
   8   9  -1  195.48   46.30
  -8  -9   1  137.49   32.20
  -8  -9   1  143.09   42.70
  -8  -9   1  108.69   31.60
  -8  -9   1  144.89   42.50
   7   9  -1  935.41   64.89
   7   9  -1  956.10   56.69
   7   9  -1  791.82   62.29
   7   9  -1  995.00   69.99
  -7  -9   1 1003.30   64.09
  -7  -9   1  925.31   58.49
  -7  -9   1 1014.80   70.39
  -7  -9   1 1025.00   59.89
   6   9  -1  -35.20   28.60
   6   9  -1   -3.70   24.40
   6   9  -1   -7.70   33.90
   6   9  -1  -12.00   26.40
  -6  -9   1  -43.50   23.40
  -6  -9   1    3.10   31.40
  -6  -9   1   -2.50   23.50
   5   9  -1  161.58   39.30
   5   9  -1  194.18   38.90
   5   9  -1  177.58   32.70
   5   9  -1  162.18   29.10
  -5  -9   1  197.18   39.20
  -5  -9   1  151.68   28.90
  -5  -9   1  193.68   35.10
  -5  -9   1  158.88   27.30
   4   9  -1   -5.80   21.90
   4   9  -1   45.10   31.10
   4   9  -1  -51.79   25.60
   4   9  -1    7.20   26.00
  -4  -9   1    3.50   22.40
  -4  -9   1   -2.10   20.50
  -4  -9   1    5.80   31.40
  -4  -9   1  -24.80   27.20
   3   9  -1  283.17   38.30
   3   9  -1  265.37   35.50
   3   9  -1  231.58   31.80
   3   9  -1  194.98   39.20
  -3  -9   1  247.18   34.80
  -3  -9   1  222.98   26.20
  -3  -9   1  201.28   39.10
  -3  -9   1  247.48   32.30
   2   9  -1  844.82   53.49
   2   9  -1  765.02   49.00
   2   9  -1  742.93   55.99
   2   9  -1  822.82   46.50
  -2  -9   1  735.73   58.99
  -2  -9   1  857.31   44.30
  -2  -9   1  735.13   47.50
  -2  -9   1  856.81   54.09
   1   9  -1   38.50   26.10
   1   9  -1   51.99   25.00
   1   9  -1    2.10   30.90
   1   9  -1   45.20   22.30
  -1  -9   1   -2.70   46.10
  -1  -9   1    4.80   31.10
  -1  -9   1   -2.70   18.60
  -1  -9   1   24.10   26.10
   0   9  -1 2106.79   85.99
   0   9  -1 2216.68   72.79
   0  -9   1 2193.08   69.99
   0  -9   1 2205.98   72.59
   0  -9   1 2225.08   81.09
   0  -9   1 2232.68   86.49
  -1   9  -1  -35.80   29.40
  -1   9  -1   -7.80   20.70
  -1   9  -1   -1.50   35.70
   1  -9   1   58.19   26.60
   1  -9   1  -14.60   28.60
   1  -9   1    7.90   19.10
   1  -9   1   13.10   23.30
  -2   9  -1  146.29   37.50
  -2   9  -1  151.48   24.10
   2  -9   1  198.78   36.10
   2  -9   1  275.07   37.60
   2  -9   1  174.68   29.20
   2  -9   1  196.28   25.40
  -3   9  -1  321.57   50.09
  -3   9  -1  368.06   39.80
   3  -9   1  391.66   44.80
   3  -9   1  331.27   49.50
   3  -9   1  401.86   39.70
   3  -9   1  461.35   40.10
  -4   9  -1  227.68   28.20
   4  -9   1  216.58   32.20
   4  -9   1  245.98   36.30
   4  -9   1  172.58   30.40
   4  -9   1  225.78   31.40
   4  -9   1  241.08   28.00
   4  -9   1  213.78   39.30
  -5   9  -1 3189.08   97.29
   5  -9   1 3245.78  100.69
   5  -9   1 3352.06   99.39
   5  -9   1 3341.17  102.89
   5  -9   1 3296.47  108.39
[truncated: 7,652,882 more chars]
